# Supplementary material for: PPARγ mediated enhanced lipid biogenesis fuels Mycobacterium tuberculosis growth in a drug-tolerant hepatocyte environment
Source: eLife journal article supplement (doi:10.7554/elife.103817), 2025-01-06
Supplement: fig6-data3 [file elife-103817-fig6-data3-v1.pdf]

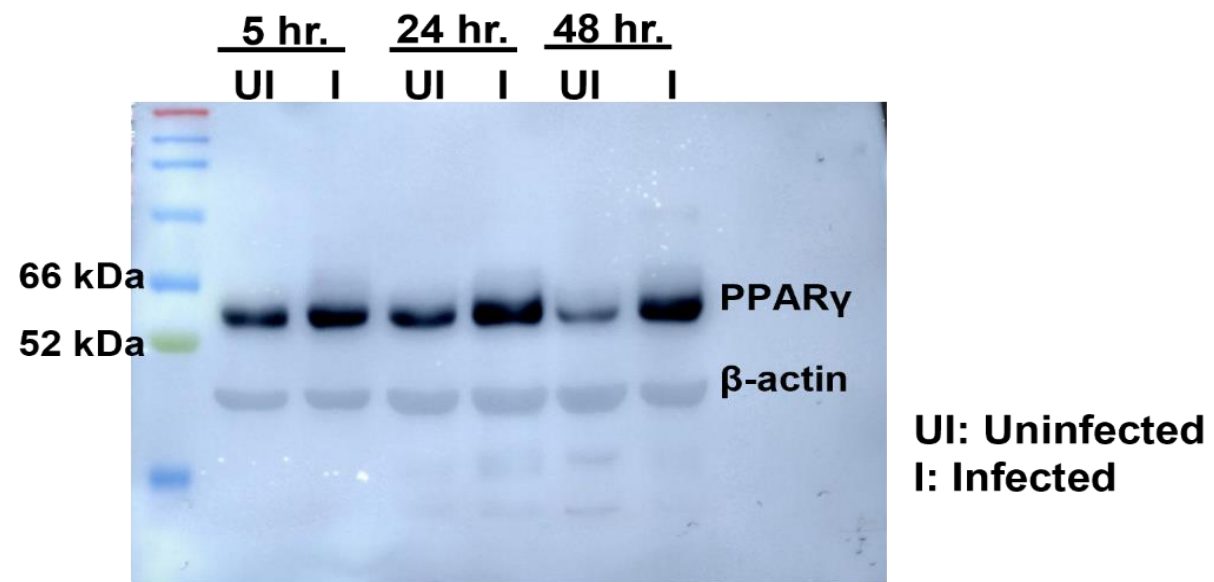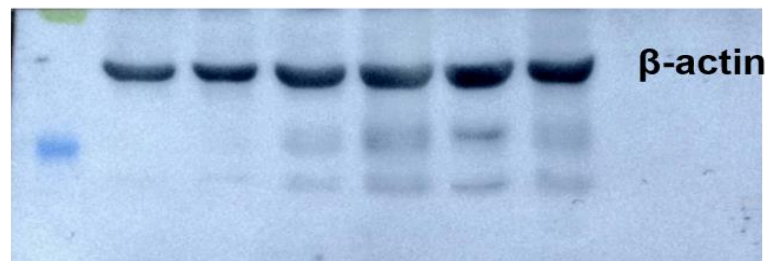

**$\beta$ -actin of the same blot, cut and developed separately**
