# Supplementary material for: PPARγ mediated enhanced lipid biogenesis fuels Mycobacterium tuberculosis growth in a drug-tolerant hepatocyte environment
Source: eLife. 2025 Dec 8;14:RP103817. doi: 10.7554/eLife.103817 (PMC12685304; doi:10.7554/eLife.103817)
Supplement: Figure 2—figure supplement 1—source data 1. [file elife-103817-fig2-figsupp1-data1.xlsx]

## Sheet: Fig 2-fig supp 1-source data 1
log10 CFU/10 million hepatocytes at the mentioned timepoints
	Day 10	Day 20	Day 30
	2	2.67	3.45
	2.1	2.87	4.5
	1.89	2.67	3.67	N=5 mice
	2.3	3.4	3.65
	2.12	3.21	3.87
