# Supplementary material for: PPARγ mediated enhanced lipid biogenesis fuels Mycobacterium tuberculosis growth in a drug-tolerant hepatocyte environment
Source: eLife. 2025 Dec 8;14:RP103817. doi: 10.7554/eLife.103817 (PMC12685304; doi:10.7554/eLife.103817)
Supplement: Figure 2—figure supplement 1—source data 2. [file elife-103817-fig2-figsupp1-data2.xlsx]

## Sheet: Fig2-fig supp 1-Source data 2
Albumin levels in the infected mice at the mentioned time points of infection						Statistical parameters for Albumin quantification
	Week 4	Week 6	Week 8	Week 10		Tukey's multiple comparisons test	Mean Diff.	95.00% CI of diff.	Below threshold?	Summary	Adjusted P Value
	2.6	3.2	3.1	2.9		Week 4 vs. Week 6	-0.25	-0.5515 to 0.05149	No	ns	0.1176	A-B
	2.9	2.8	3.3	3		Week 4 vs. Week 8	-0.325	-0.6265 to -0.02351	Yes	*	0.0334	A-C
	2.8	3.1	3	3.1		Week 4 vs. Week 10	-0.15	-0.4515 to 0.1515	No	ns	0.4796	A-D
	2.9	3.1	3.1	2.8		Week 6 vs. Week 8	-0.075	-0.3765 to 0.2265	No	ns	0.8797	B-C
						Week 6 vs. Week 10	0.1	-0.2015 to 0.4015	No	ns	0.7606	B-D
						Week 8 vs. Week 10	0.175	-0.1265 to 0.4765	No	ns	0.3543	C-D
						Test details	Mean 1	Mean 2	Mean Diff.	SE of diff.	n1	n2	q	DF
						Week 4 vs. Week 6	2.8	3.05	-0.25	0.1016	4	4	3.482	12
						Week 4 vs. Week 8	2.8	3.125	-0.325	0.1016	4	4	4.526	12
						Week 4 vs. Week 10	2.8	2.95	-0.15	0.1016	4	4	2.089	12
						Week 6 vs. Week 8	3.05	3.125	-0.075	0.1016	4	4	1.044	12
						Week 6 vs. Week 10	3.05	2.95	0.1	0.1016	4	4	1.393	12
						Week 8 vs. Week 10	3.125	2.95	0.175	0.1016	4	4	2.437	12
ALT levels in the infected mice at the mentioned time points of infection						Statistical parameters for ALT quantification
	Week 4	Week 6	Week 8	Week 10		Tukey's multiple comparisons test	Mean Diff.	95.00% CI of diff.	Below threshold?	Summary	Adjusted P Value
	90.37	59.23	120.34	116.99		Week 4 vs. Week 6	-17.22	-65.18 to 30.75	No	ns	0.7158	A-B
	73.56	114.55	75.57	79.72		Week 4 vs. Week 8	-25.9	-73.87 to 22.07	No	ns	0.4129	A-C
	30.23	89.24	70.47	88.3		Week 4 vs. Week 10	-28.32	-76.28 to 19.65	No	ns	0.3409	A-D
	63.31	63.31	94.69	85.72		Week 6 vs. Week 8	-8.685	-56.65 to 39.28	No	ns	0.9481	B-C
						Week 6 vs. Week 10	-11.1	-59.07 to 36.87	No	ns	0.9001	B-D
						Week 8 vs. Week 10	-2.415	-50.38 to 45.55	No	ns	0.9987	C-D
						Test details	Mean 1	Mean 2	Mean Diff.	SE of diff.	n1	n2	q	DF
						Week 4 vs. Week 6	64.37	81.58	-17.22	16.16	4	4	1.507	12
						Week 4 vs. Week 8	64.37	90.27	-25.9	16.16	4	4	2.267	12
						Week 4 vs. Week 10	64.37	92.68	-28.32	16.16	4	4	2.479	12
						Week 6 vs. Week 8	81.58	90.27	-8.685	16.16	4	4	0.7602	12
						Week 6 vs. Week 10	81.58	92.68	-11.1	16.16	4	4	0.9716	12
						Week 8 vs. Week 10	90.27	92.68	-2.415	16.16	4	4	0.2114	12
						Statistical parameters for AST quantification
AST levels in the infected mice at the mentioned time points of infection									Tukey's multiple comparisons test	Mean Diff.	95.00% CI of diff.	Below threshold?	Summary	Adjusted P Value
	137.98	105.17	156	167.19					Week 4 vs. Week 6	-7.908	-48.38 to 32.57	No	ns	0.9362	A-B
	94.22	107	137.15	123.57					Week 4 vs. Week 8	-46.07	-86.55 to -5.600	Yes	*	0.0244	A-C
	64.4	122.79	139.81	136.55					Week 4 vs. Week 10	-40.65	-81.12 to -0.1774	Yes	*	0.0489	A-D
	100.77	94.04	148.7	132.66					Week 6 vs. Week 8	-38.17	-78.64 to 2.308	No	ns	0.0669	B-C
									Week 6 vs. Week 10	-32.74	-73.22 to 7.730	No	ns	0.1296	B-D
									Week 8 vs. Week 10	5.422	-35.05 to 45.90	No	ns	0.9777	C-D
									Test details	Mean 1	Mean 2	Mean Diff.	SE of diff.	n1	n2	q	DF
									Week 4 vs. Week 6	99.34	107.3	-7.908	13.63	4	4	0.8203	12
									Week 4 vs. Week 8	99.34	145.4	-46.07	13.63	4	4	4.78	12
									Week 4 vs. Week 10	99.34	140	-40.65	13.63	4	4	4.217	12
									Week 6 vs. Week 8	107.3	145.4	-38.17	13.63	4	4	3.959	12
									Week 6 vs. Week 10	107.3	140	-32.74	13.63	4	4	3.397	12
									Week 8 vs. Week 10	145.4	140	5.422	13.63	4	4	0.5625	12
							Statistical parameters for GGT quantification
									Tukey's multiple comparisons test	Mean Diff.	95.00% CI of diff.	Below threshold?	Summary	Adjusted P Value
									Week 4 vs. Week 6	0.455	-1.180 to 2.090	No	ns	0.841	A-B
GGT levels in the infected mice at the mentioned time points of infection	0.26	0.11	3.29	2.43					Week 4 vs. Week 8	-1.828	-3.462 to -0.1927	Yes	*	0.0272	A-C
	0.8	0.88	1.8	2.82					Week 4 vs. Week 10	-2.598	-4.232 to -0.9627	Yes	**	0.0024	A-D
	1.63	0.81	3.37	5.06					Week 6 vs. Week 8	-2.283	-3.917 to -0.6477	Yes	**	0.0064	B-C
	1.2	0.27	2.74	3.97					Week 6 vs. Week 10	-3.053	-4.687 to -1.418	Yes	***	0.0006	B-D
									Week 8 vs. Week 10	-0.77	-2.405 to 0.8648	No	ns	0.5235	C-D
									Test details	Mean 1	Mean 2	Mean Diff.	SE of diff.	n1	n2	q	DF
									Week 4 vs. Week 6	0.9725	0.5175	0.455	0.5506	4	4	1.169	12
									Week 4 vs. Week 8	0.9725	2.8	-1.828	0.5506	4	4	4.694	12
									Week 4 vs. Week 10	0.9725	3.57	-2.598	0.5506	4	4	6.671	12
									Week 6 vs. Week 8	0.5175	2.8	-2.283	0.5506	4	4	5.862	12
									Week 6 vs. Week 10	0.5175	3.57	-3.053	0.5506	4	4	7.84	12
									Week 8 vs. Week 10	2.8	3.57	-0.77	0.5506	4	4	1.978	12
