# Supplementary material for: PPARγ mediated enhanced lipid biogenesis fuels Mycobacterium tuberculosis growth in a drug-tolerant hepatocyte environment
Source: eLife. 2025 Dec 8;14:RP103817. doi: 10.7554/eLife.103817 (PMC12685304; doi:10.7554/eLife.103817)
Supplement: Figure 2—figure supplement 1—source data 3. [file elife-103817-fig2-figsupp1-data3.xlsx]

## Sheet: Figure 2-fig supp1-source data3
Log10_CFU of mtb/10million hepatocytes in the mentioned time points
	WEEK 6	WEEK 8
	1.04	1.38
	1.11	1.44
	1	1.27
	1.2	1.25
	0.903	1.38
