# Supplementary material for: PPARγ mediated enhanced lipid biogenesis fuels Mycobacterium tuberculosis growth in a drug-tolerant hepatocyte environment
Source: eLife. 2025 Dec 8;14:RP103817. doi: 10.7554/eLife.103817 (PMC12685304; doi:10.7554/eLife.103817)
Supplement: Figure 2—figure supplement 2—source data 1. [file elife-103817-fig2-figsupp2-data1.xlsx]

## Sheet: Fig2-fig supp2-source data 1
log10_CFU/gram of lung, liver and spleen tissue of guinea pigs at the respective timepoints
		Lung			Spleen			Liver
	Day 1	2.019	2.06	2.29	0	0	0	0	0	0
	Week 4	4.59	4.4	4.65	3.26	3.06		2.38	2.6	3.31
	Week 8	3.45	3.49	3.39	3.22	2.79	3.3	2.66	2.97	2.22
										N=3 guinea pigs
