# Supplementary material for: PPARγ mediated enhanced lipid biogenesis fuels Mycobacterium tuberculosis growth in a drug-tolerant hepatocyte environment
Source: eLife. 2025 Dec 8;14:RP103817. doi: 10.7554/eLife.103817 (PMC12685304; doi:10.7554/eLife.103817)
Supplement: Figure 2—source data 1. [file elife-103817-fig2-data1.xlsx]

## Sheet: Figure2-Source data 1
Log10_CFU values used to plot Figure 2B
Day 1	1.25	2	2.204	2.176	2.181	0	0	0	0	0
Week 3	3.021	3.283	3.107	3.041	3	0	0	0	0	0
Week 4	3.498	3.376	3.512	3.58	3.78	1.778	1.857	1.919	1.812	1.971
Week 6	3.875	3.963	4.38	3.88	3.985	2.4	2.447	2.681	2.314	2.12			:LUNG
Week 8	4.1	4.247	4.305	4.8	5	2.91	2.86	2.945	2.5	3.148			: LIVER
Week 10	5	5.255	5.5	5.321	5.176	2.69	3.9	3.6	2.658	3.145
