# Supplementary material for: PPARγ mediated enhanced lipid biogenesis fuels Mycobacterium tuberculosis growth in a drug-tolerant hepatocyte environment
Source: eLife. 2025 Dec 8;14:RP103817. doi: 10.7554/eLife.103817 (PMC12685304; doi:10.7554/eLife.103817)
Supplement: Figure 2—source data 2. [file elife-103817-fig2-data2.xlsx]

## Sheet: Figure2-Source data 2
Log10_CFU values used to plot the Figure 2H
Day 1	Week 3	Week 4	Week 6	Week 8	Week 10
0	0	2.852	3.32	3.47	3.903
0	0	2.6989	3.198	3.57	3.72
0	0	2.653	3	3.62	3.59
0	0	2.579	3.204	3.681	3.66
