# Supplementary material for: PPARγ mediated enhanced lipid biogenesis fuels Mycobacterium tuberculosis growth in a drug-tolerant hepatocyte environment
Source: eLife. 2025 Dec 8;14:RP103817. doi: 10.7554/eLife.103817 (PMC12685304; doi:10.7554/eLife.103817)
Supplement: Figure 3—figure supplement 1—source data 1. [file elife-103817-fig3-figsupp1-data1.xlsx]

## Sheet: Fig3-fig supp1-source data 1
Percentage infection of labeled Mtb in primary hepatocytes at the mentioned MOI	MOI: 1	MOI: 5	MOI: 10
	18.5	26.66	60
	15.67	33.33	58.33
	18.75	30.7	63.63
	20	31.25	61.53
	13.33	25	70
