# Supplementary material for: PPARγ mediated enhanced lipid biogenesis fuels Mycobacterium tuberculosis growth in a drug-tolerant hepatocyte environment
Source: eLife. 2025 Dec 8;14:RP103817. doi: 10.7554/eLife.103817 (PMC12685304; doi:10.7554/eLife.103817)
Supplement: Figure 3—figure supplement 1—source data 2. [file elife-103817-fig3-figsupp1-data2.xlsx]

## Sheet: Fig 3-fig supp 1-source data 2
	Percentage infection of labeled Mtb in HepG2 in the mentioned MOIs
		MOI: 1	MOI: 2.5	MOI: 5	MOI: 10
		15.4	30.8	47.3	70.3
		16.8	28.9	46.4	70.6
		16.7	32.6	50.1	71.5
		16.4	31.2	46.9	70.6
		15.2	29.2	48.9	68.7
