# Supplementary material for: PPARγ mediated enhanced lipid biogenesis fuels Mycobacterium tuberculosis growth in a drug-tolerant hepatocyte environment
Source: eLife. 2025 Dec 8;14:RP103817. doi: 10.7554/eLife.103817 (PMC12685304; doi:10.7554/eLife.103817)
Supplement: Figure 3—figure supplement 1—source data 3. [file elife-103817-fig3-figsupp1-data3.xlsx]

## Sheet: Fig3-fig supp1-source data 3
CFU/ml of Mtb in HepG2 cells at the mentioned time points post infection		5 HPI	24 HPI	48 HPI	72 HPI	96 HPI
		200000	570000	620000	1000000	1250000
		300000	442000	650000	1100000	1600000
		240000	386000	850000	1650000	1700000
		180000	300000	700000	1380000	1500000
		230000	424500	705000	1282500	1512500
