# Supplementary material for: PPARγ mediated enhanced lipid biogenesis fuels Mycobacterium tuberculosis growth in a drug-tolerant hepatocyte environment
Source: eLife. 2025 Dec 8;14:RP103817. doi: 10.7554/eLife.103817 (PMC12685304; doi:10.7554/eLife.103817)
Supplement: Figure 3—figure supplement 1—source data 4. [file elife-103817-fig3-figsupp1-data4.xlsx]

## Sheet: Fig3-fig supp1-source data 4
CFU/ml of Mtb in primary mouse hepatocytes at the mentioned time points post infection	5 HPI	24 HPI	48 HPI	72 HPI
	10500	140000	180000	220000
	90000	145000	195000	230000
	80000	149000	200000	200000
	76200	150000	190000	200000
	70000	140000	210000	220000
	65340	144800	195000	214000
