# Supplementary material for: PPARγ mediated enhanced lipid biogenesis fuels Mycobacterium tuberculosis growth in a drug-tolerant hepatocyte environment
Source: eLife. 2025 Dec 8;14:RP103817. doi: 10.7554/eLife.103817 (PMC12685304; doi:10.7554/eLife.103817)
Supplement: Figure 3—figure supplement 1—source data 5. [file elife-103817-fig3-figsupp1-data5.xlsx]

## Sheet: fig3-fig supp1-source data 5
CFU/ml of Mtb in RAW 264.7 cells at the mentioned time points post infection
		5 HPI	24 HPI	48 HPI	72 HPI
		485000	854000	600000	800000
		450000	650000	785000	785400
		542000	795000	880000	700000
		450000	700000	754000	850000
		481750	749750	754700	783850
