# Supplementary material for: PPARγ mediated enhanced lipid biogenesis fuels Mycobacterium tuberculosis growth in a drug-tolerant hepatocyte environment
Source: eLife. 2025 Dec 8;14:RP103817. doi: 10.7554/eLife.103817 (PMC12685304; doi:10.7554/eLife.103817)
Supplement: Figure 3—figure supplement 1—source data 6. [file elife-103817-fig3-figsupp1-data6.xlsx]

## Sheet: Fig3-fig supp1-source data 6
CFU/ml of Mtb in THP-1 cells at the mentioned time points post infection
			5 HPI	24 HPI	48 HPI	72 HPI
			220000	400000	300000	310000
			298000	350000	254000	250000
			210000	425000	280000	264000
			300000	360000	286000	310000
			282000	385000	250000	200000
			262000	384000	274000	266800
