# Supplementary material for: PPARγ mediated enhanced lipid biogenesis fuels Mycobacterium tuberculosis growth in a drug-tolerant hepatocyte environment
Source: eLife. 2025 Dec 8;14:RP103817. doi: 10.7554/eLife.103817 (PMC12685304; doi:10.7554/eLife.103817)
Supplement: Figure 3—figure supplement 1—source data 7. [file elife-103817-fig3-figsupp1-data7.xlsx]

## Sheet: Fig3-fig supp1-source data 7
CFU/ml of Mtb in bone marrow derived macrophages at the mentioned time points post infection		5 HPI	24 HPI	48 HPI	72 HPI
		300000	400000	450000	550000
		400000	500000	600000	650000
		450000	540000	550000	600000
		400000	420000	500000	550000
		387500	465000	525000	587500
