# Supplementary material for: PPARγ mediated enhanced lipid biogenesis fuels Mycobacterium tuberculosis growth in a drug-tolerant hepatocyte environment
Source: eLife. 2025 Dec 8;14:RP103817. doi: 10.7554/eLife.103817 (PMC12685304; doi:10.7554/eLife.103817)
Supplement: Figure 3—source data 1. [file elife-103817-fig3-data1.xlsx]

## Sheet: Figure 3-Source data 1
Percentage infected cells in the different cell lines (Figure 3B)
BMDMs	RAW 264.7	AML-12	PHCs	THP-1	HepG2	Huh-7
65	50	55	55	65	75	70
70	63	45	60	70	69	68
80	67	42	58	72	72	68
70	66	52	60	60	72	65
70	58	55	57	65	70	70
