# Supplementary material for: PPARγ mediated enhanced lipid biogenesis fuels Mycobacterium tuberculosis growth in a drug-tolerant hepatocyte environment
Source: eLife. 2025 Dec 8;14:RP103817. doi: 10.7554/eLife.103817 (PMC12685304; doi:10.7554/eLife.103817)
Supplement: Figure 3—source data 2. [file elife-103817-fig3-data2.xlsx]

## Sheet: Figure 3-Source data 2
Log10 CFU/ml of Mtb in different cell lines (Figure 3C)
BMDMs	Raw264.7	AML-12	PHCs	THP-1	HepG2	Huh-7
5.55	5.1	4.5	4.9	5.68	5.4	6
5.4	5.15	4.8	5	5.87	5.21	5.89
5.6	5.21	4.76	5	5.57	5.24	5.82
5.85	5.33	4.8	4.89	5.28	5.1	6.2
5.6	5.21	4.35	5.1	5.3	5.21	6
	4.98	4.57	5.2	5.66	5.26	5.6
	5	4.5	4.8	5.42	5.3	5.78
