# Supplementary material for: PPARγ mediated enhanced lipid biogenesis fuels Mycobacterium tuberculosis growth in a drug-tolerant hepatocyte environment
Source: eLife. 2025 Dec 8;14:RP103817. doi: 10.7554/eLife.103817 (PMC12685304; doi:10.7554/eLife.103817)
Supplement: Figure 3—source data 3. [file elife-103817-fig3-data3.xlsx]

## Sheet: Figure 3-Source data 3
Mean Fluorescent intensity of labeled Mtb/ cell of primary hepatocyte-Figure 3E
5 HPI	48 HPI	120 HPI
3485	15089.4	54034.4
9456.76	18005.5	50074.8
8500.53	14652.2	51083.3
6534.45	14764.5	56845.4
3740.4	19678.5	48244.1
4200.97	14082.3	40629.7
