# Supplementary material for: PPARγ mediated enhanced lipid biogenesis fuels Mycobacterium tuberculosis growth in a drug-tolerant hepatocyte environment
Source: eLife. 2025 Dec 8;14:RP103817. doi: 10.7554/eLife.103817 (PMC12685304; doi:10.7554/eLife.103817)
Supplement: Figure 3—source data 4. [file elife-103817-fig3-data4.xlsx]

## Sheet: Figure 3-Source data 4
Mean fluorescent intensity of labeled Mtb/ HepG2 cell- Figure 3G.
5 HPI	24 HPI	48 HPI	96 HPI	120 HPI
8008.24	11249.8	19456.3	54035.4	70231.3
6765.65	12754.3	20456.6	57543.5	69526.4
9945.23	11065.5	21854.4	53984.3	75455.6
6345.56	13433.5	22454.6	51621.9	61456.7
6678.3	12728.4	21456.3	55345.4	71566.5
7973.34	14345.6	22698.5	49456.7	75466.5
								Fi
