# Supplementary material for: PPARγ mediated enhanced lipid biogenesis fuels Mycobacterium tuberculosis growth in a drug-tolerant hepatocyte environment
Source: eLife. 2025 Dec 8;14:RP103817. doi: 10.7554/eLife.103817 (PMC12685304; doi:10.7554/eLife.103817)
Supplement: Figure 3—source data 5. [file elife-103817-fig3-data5.xlsx]

## Sheet: Figure 3-Source data 5
Fold change of the growth rate of Mtb within the different cell lines-Figire 3H
	HepG2	PHCs	RAW 264.7	THP-1	BMDMs
5 HPI	1	1	1	1	1
24 HPI	1.8457	2.2161	1.5563	1.46	1.2
48 HPI	3.0652	2.9844	1.5667	1.0458	1.354
72 HPI	5.57	3.275	1.62709	1.018	1.51613
