# Supplementary material for: PPARγ mediated enhanced lipid biogenesis fuels Mycobacterium tuberculosis growth in a drug-tolerant hepatocyte environment
Source: eLife. 2025 Dec 8;14:RP103817. doi: 10.7554/eLife.103817 (PMC12685304; doi:10.7554/eLife.103817)
Supplement: Figure 4—source data 1. [file elife-103817-fig4-data1.xlsx]

## Sheet: Figure 4-Source data 1
Differentially expressed genes at 0 hours post infection-Figure 4D
Ensembl Gene ID	Base Mean	log2FoldChange	lfcSE	stat	pvalue	padj	symbol	ENTREZID
ENSG00000164190	7260.65	29.7886	3.38338	8.80439	1.32e-18	6.99e-15	NIPBL	25836
ENSG00000118579	432.103	25.8716	3.38346	7.64648	2.07e-14	5.82e-11	MED28	80306
ENSG00000154719	79.2236	21.8467	3.38388	6.4561	1.07e-10	1.01e-07	MRPL39	54148
ENSG00000135899	87.4385	9.98601	2.76309	3.61407	0.00030143	0.00928348	SP110	3431
ENSG00000028528	67.2365	9.60696	2.7508	3.49242	0.000478663	0.0122049	SNX1	6642
ENSG00000157873	53.019	7.11717	2.31502	3.07435	0.00210963	0.0309208	TNFRSF14	8764
ENSG00000249241	32.6081	6.10223	1.17206	5.20642	1.93e-07	4.63e-05	LINC02265	101060498
ENSG00000106028	30.0521	5.85648	1.40925	4.15574	3.24e-05	0.00211641	SSBP1	6742
ENSG00000270923	30.0521	5.85648	1.40925	4.15574	3.24e-05	0.00211641	TAS2R6P	448990
ENSG00000125740	16758	5.66143	0.990894	5.71346	1.11e-08	4.92e-06	FOSB	2354
ENSG00000120738	17601.3	5.43383	0.951775	5.70915	1.14e-08	4.97e-06	EGR1	1958
ENSG00000170345	26309.4	5.24445	0.951437	5.51214	3.54e-08	1.11e-05	FOS	2353
ENSG00000257725	21.3023	5.1614	1.14497	4.50789	6.55e-06	0.000726465	LINC02399	105369891
ENSG00000259884	228.27	4.97989	1.732	2.87522	0.00403748	0.0444207	NR4A1AS	115409980
ENSG00000144339	52.4173	4.75793	0.848381	5.60824	2.04e-08	7.55e-06	TMEFF2	23671
ENSG00000243629	47.8699	4.54736	1.1321	4.01674	5.9e-05	0.00327559	LINC00880	339894
ENSG00000138166	15068.6	4.47186	0.84228	5.30923	1.1e-07	2.95e-05	DUSP5	1847
ENSG00000162771	32.9527	3.81238	1.03689	3.67675	0.00023622	0.00802905	FAM71A	149647
ENSG00000249464	30.5435	3.62207	0.862094	4.20148	2.65e-05	0.00183593	LINC01091	285419
ENSG00000188039	79.9803	3.47761	0.963324	3.61001	0.000306181	0.00938574	NWD1	284434
ENSG00000131069	9286.06	3.46457	0.6119	5.66199	1.5e-08	6.04e-06	ACSS2	55902
ENSG00000167182	890.194	3.41944	0.585652	5.83869	5.26e-09	2.84e-06	SP2	6668
ENSG00000123358	28810.2	3.22614	0.590397	5.46435	4.65e-08	1.37e-05	NR4A1	3164
ENSG00000266780	63.3532	3.21013	1.09032	2.94421	0.00323784	0.039243	MIR4444-2	100846999
ENSG00000177606	3650.05	3.17573	0.619865	5.12326	3e-07	6.57e-05	JUN	3725
ENSG00000241544	45.8604	3.1292	0.839868	3.72583	0.000194675	0.00723552	LINC02029	105374177
ENSG00000200997	650.178	3.04094	0.553885	5.49019	4.01e-08	1.24e-05	RNVU1-34	106480177
ENSG00000115648	171.37	2.98925	0.501085	5.96556	2.44e-09	1.56e-06	MLPH	79083
ENSG00000232010	18.9755	2.88105	0.714035	4.03489	5.46e-05	0.00310659	DNMT3L-AS1	105372833
ENSG00000206579	108.959	2.86464	0.648915	4.4145	1.01e-05	0.000932142	XKR4	114786
ENSG00000089127	1664.97	2.85788	0.886906	3.2223	0.00127165	0.0223797	OAS1	4938
ENSG00000131737	35.7798	2.82745	0.716836	3.94435	8e-05	0.00391722	KRT34	3885
ENSG00000255150	3267.09	2.79424	0.495152	5.64319	1.67e-08	6.48e-06	EID3	493861
ENSG00000081041	449.196	2.74962	0.41952	6.55421	5.59e-11	6.12e-08	CXCL2	2920
ENSG00000234667	21.918	2.68793	0.856144	3.13957	0.00169193	0.0268418	ACTL11P	389120
ENSG00000146676	1448.7	2.59663	0.891257	2.91345	0.00357461	0.041516	PURB	5814
ENSG00000284261	1448.7	2.59663	0.891257	2.91345	0.00357461	0.041516	MIR4657	100616393
ENSG00000201801	185.672	2.55823	0.51771	4.94142	7.76e-07	0.000141321	RNU5E-4P	100873829
ENSG00000162947	44.2989	2.54985	0.633128	4.02738	5.64e-05	0.00316913	LINC01931	150596
ENSG00000104804	80.7289	2.50525	0.62329	4.01939	5.83e-05	0.00325756	TULP2	7288
ENSG00000136244	345.79	2.493	0.607365	4.10462	4.05e-05	0.00249448	IL6	3569
ENSG00000205978	68.3059	2.47737	0.639777	3.87224	0.000107841	0.00477193	NYNRIN	57523
ENSG00000127528	1111.82	2.43385	0.431376	5.64205	1.68e-08	6.48e-06	KLF2	10365
ENSG00000286172	213.666	2.38436	0.496497	4.80237	1.57e-06	0.00025555	RNVU1-8	101447996
ENSG00000139318	3051.69	2.34598	0.432116	5.42905	5.67e-08	1.62e-05	DUSP6	1848
ENSG00000264229	391.421	2.29969	0.435015	5.28645	1.25e-07	3.18e-05	RNU4ATAC	100151683
ENSG00000182796	457.04	2.28094	0.339536	6.71783	1.84e-11	2.39e-08	TMEM198B	440104
ENSG00000222724	595.627	2.27325	0.463357	4.90604	9.29e-07	0.000164769	RNU2-63P	106480225
ENSG00000276027	1052.46	2.2524	0.397747	5.6629	1.49e-08	6.04e-06	RNU12	267010
ENSG00000201558	278.302	2.20377	0.588836	3.74259	0.000182137	0.00687665	RNVU1-6	101954276
ENSG00000253479	21.5761	2.20155	0.633945	3.47278	0.000515104	0.0127272	LINC01603	100505739
ENSG00000243806	26.2128	2.19751	0.717924	3.06092	0.00220656	0.0318658	RPL7P18	100270852
ENSG00000201183	127.148	2.19405	0.46007	4.76896	1.85e-06	0.000292557	RNVU1-3	101954272
ENSG00000199347	254.606	2.19	0.670052	3.2684	0.00108156	0.0203241	RNU5E-1	26829
ENSG00000100225	1726.92	2.18538	0.51057	4.28027	1.87e-05	0.0014489	FBXO7	25793
ENSG00000212248	19.3251	2.18156	0.647404	3.36971	0.000752478	0.0161845	RNU6-750P	106479897
ENSG00000231826	35.5096	2.12286	0.669612	3.17028	0.00152292	0.0250379	LINC01819	102723854
ENSG00000251574	94.6652	2.10384	0.555794	3.78529	0.000153527	0.00606708	LOC105379109	105379109
ENSG00000120875	6781.33	2.08783	0.455446	4.58414	4.56e-06	0.000553797	DUSP4	1846
ENSG00000207501	1840.98	2.06929	0.334185	6.19206	5.94e-10	5.03e-07	RNVU1-14	101954266
ENSG00000121769	471.025	2.04616	0.274258	7.46071	8.61e-14	2.05e-10	FABP3	2170
ENSG00000128016	1880.79	2.04027	0.363706	5.60966	2.03e-08	7.55e-06	ZFP36	7538
ENSG00000171658	487.845	2.03713	0.466255	4.36914	1.25e-05	0.00107315	NMRAL2P	344887
ENSG00000035403	10256.6	2.03043	0.449704	4.51504	6.33e-06	0.000722233	VCL	7414
ENSG00000137193	4541.74	2.02167	0.279709	7.22777	4.91e-13	1.07e-09	PIM1	5292
ENSG00000101132	305.23	2.01853	0.672195	3.0029	0.00267421	0.0355918	PFDN4	5203
ENSG00000125354	1603	2.01564	0.559192	3.60456	0.000312683	0.00944067	SEPTIN6	23157
ENSG00000201699	25.9926	1.99012	0.591647	3.3637	0.000769042	0.0164452	RNVU1-24	106480167
ENSG00000189377	48.8831	1.9864	0.55065	3.60737	0.000309319	0.00942688	CXCL17	284340
ENSG00000199377	609.837	1.98502	0.440475	4.50655	6.59e-06	0.000726465	RNU5F-1	26828
ENSG00000200169	609.837	1.98502	0.440475	4.50655	6.59e-06	0.000726465	RNU5D-1	26830
ENSG00000052802	23649.8	1.98417	0.413646	4.79679	1.61e-06	0.000259552	MSMO1	6307
ENSG00000087074	9615.38	1.9704	0.395372	4.98367	6.24e-07	0.000119499	PPP1R15A	23645
ENSG00000009950	363.424	1.9532	0.596786	3.27286	0.00106465	0.0200692	MLXIPL	51085
ENSG00000235172	34.2824	1.94329	0.439589	4.42068	9.84e-06	0.00091227	LINC01366	257358
ENSG00000188396	251.332	1.94208	0.488135	3.97857	6.93e-05	0.00360958	DYNLT4	343521
ENSG00000237986	73.1952	1.92661	0.49525	3.89018	0.000100168	0.00454741	CELF2-AS2	439950
ENSG00000128050	6460.15	1.90721	0.412168	4.62726	3.71e-06	0.000482362	PAICS	10606
ENSG00000169435	21.4179	1.9027	0.539917	3.52405	0.000424997	0.0112988	RASSF6	166824
ENSG00000162512	1182.26	1.89865	0.627919	3.02372	0.00249691	0.0343931	SDC3	9672
ENSG00000196972	46.5611	1.851	0.468767	3.94866	7.86e-05	0.00388312	SMIM10L2B	644596
ENSG00000179388	34.6503	1.84484	0.549171	3.35931	0.000781368	0.0165467	EGR3	1960
ENSG00000253981	25.6828	1.81504	0.605014	3	0.00269981	0.035604	ALG1L13P	106479038
ENSG00000232656	2345.84	1.81018	0.392481	4.61215	3.99e-06	0.000510115	IDI2-AS1	55853
ENSG00000006747	366.73	1.80492	0.365092	4.94372	7.66e-07	0.000140639	SCIN	85477
ENSG00000169429	418.868	1.79644	0.527339	3.40662	0.000657728	0.0149168	CXCL8	3576
ENSG00000199879	319.221	1.79201	0.449893	3.98319	6.8e-05	0.00358493	RNVU1-22	106481627
ENSG00000233893	70.4541	1.77984	0.515387	3.45341	0.00055354	0.013302	EZR-AS1	101409257
ENSG00000125772	3368.02	1.77557	0.415833	4.2699	1.96e-05	0.00148789	GPCPD1	56261
ENSG00000181847	40.2577	1.77298	0.40352	4.3938	1.11e-05	0.00101135	TIGIT	201633
ENSG00000122877	47.2296	1.76752	0.594327	2.97399	0.00293958	0.0370661	EGR2	1959
ENSG00000186480	38099.7	1.76269	0.401696	4.38811	1.14e-05	0.0010205	INSIG1	3638
ENSG00000142182	34.8819	1.7498	0.563843	3.10335	0.00191342	0.0291821	DNMT3L	29947
ENSG00000145545	4541.94	1.74724	0.375987	4.64708	3.37e-06	0.000453025	SRD5A1	6715
ENSG00000225462	328.574	1.74612	0.424922	4.10928	3.97e-05	0.00246205	FDPSP1	343332
ENSG00000112972	8979.37	1.73376	0.424609	4.08319	4.44e-05	0.00268669	HMGCS1	3157
ENSG00000218739	1821.63	1.73286	0.516112	3.35753	0.000786422	0.0165792	CEBPZOS	100505876
ENSG00000250072	85.6105	1.73059	0.445235	3.88691	0.00010153	0.00459334	SH3TC2-DT	255187
ENSG00000119673	698.918	1.72885	0.509516	3.39313	0.000691	0.0152754	ACOT2	10965
ENSG00000277610	61.8388	1.72575	0.41833	4.12534	3.7e-05	0.00234061	RNVU1-4	101954264
ENSG00000163738	1889.33	1.70949	0.383716	4.45508	8.39e-06	0.000835744	MTHFD2L	441024
ENSG00000182585	1889.33	1.70949	0.383716	4.45508	8.39e-06	0.000835744	EPGN	255324
ENSG00000156384	621.587	1.70597	0.48367	3.52715	0.000420064	0.0112017	SFR1	119392
ENSG00000266554	53.623	1.70407	0.567809	3.00114	0.00268973	0.0355918	LINC01443	400644
ENSG00000250556	81.0374	1.70138	0.559696	3.03983	0.00236709	0.0332864	CCDC34P1	100288584
ENSG00000149809	830.483	1.69947	0.456448	3.72325	0.000196675	0.00728921	TM7SF2	7108
ENSG00000149823	830.483	1.69947	0.456448	3.72325	0.000196675	0.00728921	VPS51	738
ENSG00000067082	9560.02	1.6836	0.420198	4.00669	6.16e-05	0.00337555	KLF6	1316
ENSG00000247746	356.277	1.68135	0.367296	4.57764	4.7e-06	0.000568647	USP51	158880
ENSG00000184574	240.194	1.68123	0.405189	4.14925	3.34e-05	0.00216011	LPAR5	57121
ENSG00000207205	474.961	1.67713	0.280972	5.96902	2.39e-09	1.56e-06	RNVU1-15	101954267
ENSG00000260630	1818.88	1.67354	0.383911	4.35919	1.31e-05	0.00111216	SNAI3-AS1	197187
ENSG00000250033	860.874	1.66893	0.360176	4.63365	3.59e-06	0.000476281	SLC7A11-AS1	641364
ENSG00000230495	329.165	1.66647	0.441305	3.77624	0.000159214	0.00620771	LOC100286962	100286962
ENSG00000224596	32.738	1.66109	0.570148	2.91343	0.00357485	0.041516	ZMIZ1-AS1	283050
ENSG00000143869	144.38	1.65483	0.385155	4.29654	1.73e-05	0.00137945	GDF7	151449
ENSG00000118520	89.9445	1.64963	0.471526	3.49849	0.000467892	0.0120368	ARG1	383
ENSG00000138379	21.4947	1.64832	0.543904	3.03053	0.00244126	0.0339293	MSTN	2660
ENSG00000265142	781.568	1.64539	0.403919	4.07357	4.63e-05	0.00273624	MIR133A1HG	102723167
ENSG00000283927	781.568	1.64539	0.403919	4.07357	4.63e-05	0.00273624	MIR133A1	406922
ENSG00000284453	781.568	1.64539	0.403919	4.07357	4.63e-05	0.00273624	MIR1-2	406905
ENSG00000149527	809.6	1.64198	0.456128	3.59983	0.000318423	0.00948323	PLCH2	9651
ENSG00000079459	20271.9	1.63626	0.362307	4.51623	6.3e-06	0.000722233	FDFT1	2222
ENSG00000227630	168.454	1.62886	0.568982	2.86276	0.00419962	0.0453691	LINC01132	100506810
ENSG00000173846	892.067	1.61857	0.301153	5.37459	7.68e-08	2.14e-05	PLK3	1263
ENSG00000175592	2151.03	1.60774	0.401593	4.00342	6.24e-05	0.00339889	FOSL1	8061
ENSG00000109920	192.818	1.60323	0.433938	3.6946	0.00022023	0.00769484	FNBP4	23360
ENSG00000148346	108.634	1.59245	0.291029	5.47179	4.46e-08	1.34e-05	LCN2	3934
ENSG00000118523	15448.8	1.5902	0.340228	4.67392	2.96e-06	0.000408114	CCN2	1490
ENSG00000166483	16921.1	1.58943	0.386526	4.11209	3.92e-05	0.00243799	WEE1	7465
ENSG00000120437	13691.7	1.5798	0.331879	4.76018	1.93e-06	0.000299321	ACAT2	39
ENSG00000114854	892.425	1.5793	0.554046	2.8505	0.00436512	0.0463165	TNNC1	7134
ENSG00000134184	23.6821	1.57529	0.437052	3.60435	0.000312934	0.00944067	GSTM1	2944
ENSG00000213366	23.6821	1.57529	0.437052	3.60435	0.000312934	0.00944067	GSTM2	2946
ENSG00000102575	54.1268	1.5733	0.495191	3.17716	0.00148726	0.0247311	ACP5	54
ENSG00000199094	57.7138	1.56852	0.52443	2.99091	0.00278148	0.0361269	MIR30C2	407032
ENSG00000207827	57.7138	1.56852	0.52443	2.99091	0.00278148	0.0361269	MIR30A	407029
ENSG00000233237	57.7138	1.56852	0.52443	2.99091	0.00278148	0.0361269	LINC00472	79940
ENSG00000249628	54.5788	1.56613	0.446869	3.50467	0.000457165	0.011864	LINC00942	100292680
ENSG00000127585	716.904	1.55432	0.435381	3.57001	0.000356964	0.0101262	FBXL16	146330
ENSG00000144136	15134.9	1.53847	0.375551	4.09657	4.19e-05	0.00256615	SLC20A1	6574
ENSG00000138376	1982.64	1.53209	0.408797	3.74779	0.000178399	0.00678431	BARD1	580
ENSG00000160285	17727.3	1.51979	0.368794	4.12096	3.77e-05	0.00236844	LSS	4047
ENSG00000119138	3555.91	1.51923	0.39924	3.80531	0.000141629	0.0056999	KLF9	687
ENSG00000196549	301.329	1.51859	0.417329	3.63883	0.000273884	0.00883976	MME	4311
ENSG00000111912	13032.3	1.51693	0.35225	4.30641	1.66e-05	0.00134377	NCOA7	135112
ENSG00000142623	103.619	1.51441	0.38756	3.90755	9.32e-05	0.00433845	PADI1	29943
ENSG00000143543	2492.87	1.50578	0.338387	4.44988	8.59e-06	0.000835744	JTB	10899
ENSG00000143545	2492.87	1.50578	0.338387	4.44988	8.59e-06	0.000835744	RAB13	5872
ENSG00000143570	2492.87	1.50578	0.338387	4.44988	8.59e-06	0.000835744	SLC39A1	27173
ENSG00000160741	2492.87	1.50578	0.338387	4.44988	8.59e-06	0.000835744	CRTC2	200186
ENSG00000198837	2492.87	1.50578	0.338387	4.44988	8.59e-06	0.000835744	DENND4B	9909
ENSG00000276584	2492.87	1.50578	0.338387	4.44988	8.59e-06	0.000835744	MIR6737	102465441
ENSG00000137440	5679.86	1.49868	0.332395	4.50875	6.52e-06	0.000726465	FGFBP1	9982
ENSG00000261729	35.959	1.49463	0.451405	3.31107	0.000929386	0.0183638	GS1-204I12.4	105371653
ENSG00000236345	56.1108	1.48948	0.443783	3.35633	0.000789847	0.0165829	SCAT8	112935969
ENSG00000052749	88.1885	1.48835	0.364923	4.07853	4.53e-05	0.00272201	RRP12	23223
ENSG00000231508	88.1885	1.48835	0.364923	4.07853	4.53e-05	0.00272201	RPL34P20	100271308
ENSG00000151012	21953.4	1.48826	0.400238	3.71844	0.000200455	0.00734629	SLC7A11	23657
ENSG00000242986	36.4335	1.48296	0.488224	3.03746	0.00238584	0.0333866	RPL21P99	100271429
ENSG00000139613	2106.72	1.48221	0.423004	3.50402	0.0004583	0.011864	SMARCC2	6601
ENSG00000132196	4083.8	1.47611	0.353327	4.17776	2.94e-05	0.00196566	HSD17B7	51478
ENSG00000169247	2361.57	1.47507	0.375378	3.92957	8.51e-05	0.00412703	SH3TC2	79628
ENSG00000173401	35.5169	1.46968	0.432198	3.40047	0.000672694	0.0150902	GLIPR1L1	256710
ENSG00000048540	230.132	1.46845	0.397317	3.69592	0.000219093	0.00768584	LMO3	55885
ENSG00000168497	424.493	1.46028	0.420382	3.47369	0.000513358	0.0127246	CAVIN2	8436
ENSG00000243986	373.272	1.45622	0.36569	3.98212	6.83e-05	0.00358493	ENO1P3	100419069
ENSG00000101782	1139.72	1.45258	0.337224	4.30746	1.65e-05	0.00134159	RIOK3	8780
ENSG00000178403	73.6578	1.45128	0.375008	3.86999	0.000108839	0.00479184	NEUROG2	63973
ENSG00000162772	981.132	1.44655	0.408731	3.53913	0.000401442	0.0109159	ATF3	467
ENSG00000173295	432.717	1.44433	0.416951	3.46403	0.000532151	0.0129774	FAM86B3P	286042
ENSG00000270554	66.7421	1.44241	0.344663	4.18499	2.85e-05	0.00193359	EIF3EP4	100422200
ENSG00000197980	275.541	1.43255	0.339929	4.21426	2.51e-05	0.00177245	LEKR1	389170
ENSG00000213719	666.014	1.43218	0.419039	3.41778	0.00063135	0.0145067	CLIC1	1192
ENSG00000213722	666.014	1.43218	0.419039	3.41778	0.00063135	0.0145067	DDAH2	23564
ENSG00000134107	20912.1	1.42384	0.328918	4.32885	1.5e-05	0.00125899	BHLHE40	8553
ENSG00000144485	551.433	1.42315	0.367567	3.87181	0.000108028	0.00477216	HES6	55502
ENSG00000138685	9016.75	1.42222	0.43118	3.29843	0.000972256	0.0188391	FGF2	2247
ENSG00000145375	9016.75	1.42222	0.43118	3.29843	0.000972256	0.0188391	SPATA5	166378
ENSG00000240775	9016.75	1.42222	0.43118	3.29843	0.000972256	0.0188391	RPS26P23	100271107
ENSG00000047634	7791.87	1.41673	0.338301	4.18777	2.82e-05	0.00191501	SCML1	6322
ENSG00000130787	2109.54	1.40736	0.46594	3.02048	0.00252374	0.0345992	HIP1R	9026
ENSG00000182134	1717.3	1.39718	0.315379	4.43016	9.42e-06	0.000893844	TDRKH	11022
ENSG00000124772	39.7285	1.39472	0.476115	2.92938	0.00339635	0.0405277	CPNE5	57699
ENSG00000258667	7909.93	1.39306	0.337517	4.12739	3.67e-05	0.00233117	HIF1A-AS3	105370526
ENSG00000142676	6817.68	1.37858	0.406848	3.38845	0.000702883	0.0154469	RPL11	6135
ENSG00000165115	505.455	1.36952	0.415398	3.2969	0.000977583	0.0188715	KIF27	55582
ENSG00000136826	3604.4	1.35933	0.328451	4.13859	3.49e-05	0.00224739	KLF4	9314
ENSG00000172348	296.533	1.3543	0.340151	3.98146	6.85e-05	0.00358493	RCAN2	10231
ENSG00000130518	9493.97	1.351	0.372375	3.62807	0.000285545	0.00903823	IQCN	80726
ENSG00000130522	9493.97	1.351	0.372375	3.62807	0.000285545	0.00903823	JUND	3727
ENSG00000174521	52.8164	1.33998	0.440223	3.04386	0.00233563	0.0330561	TTC9B	148014
ENSG00000260832	76.6778	1.32902	0.342767	3.87734	0.000105603	0.00470508	LOC101928417	101928417
ENSG00000166634	175.206	1.3273	0.400421	3.31477	0.000917197	0.0182466	SERPINB12	89777
ENSG00000226216	48.4416	1.31701	0.369689	3.56249	0.00036735	0.0103041	RPS12P5	100271053
ENSG00000142583	50.2992	1.31544	0.439371	2.99392	0.00275422	0.0360935	SLC2A5	6518
ENSG00000102452	552.257	1.30903	0.363665	3.59956	0.000318758	0.00948323	NALCN	259232
ENSG00000118503	12622.3	1.30733	0.442689	2.95315	0.00314552	0.0385861	TNFAIP3	7128
ENSG00000236101	96.2725	1.30021	0.353899	3.67397	0.000238812	0.00810663	RAC1P7	100874390
ENSG00000288691	133.173	1.29651	0.35177	3.68568	0.000228097	0.00782388	LOC105377369	105377369
ENSG00000126583	38.1287	1.2949	0.412043	3.14262	0.00167444	0.0266286	PRKCG	5582
ENSG00000163082	194.933	1.29298	0.441978	2.92543	0.00343979	0.0408503	SGPP2	130367
ENSG00000172296	431.683	1.28907	0.375611	3.43191	0.000599339	0.0139668	SPTLC3	55304
ENSG00000247498	1740.2	1.28418	0.380105	3.37848	0.000728879	0.0157934	GPRC5D-AS1	100506314
ENSG00000184227	2155.78	1.28072	0.325776	3.9313	8.45e-05	0.00412076	ACOT1	641371
ENSG00000128607	4488.43	1.277	0.363025	3.51768	0.000435341	0.0115271	KLHDC10	23008
ENSG00000125538	164.201	1.27697	0.382925	3.33477	0.000853688	0.0174733	IL1B	3553
ENSG00000160888	12149.1	1.27605	0.323187	3.94833	7.87e-05	0.00388312	IER2	9592
ENSG00000101255	8575.48	1.27505	0.352496	3.61721	0.0002978	0.00922583	TRIB3	57761
ENSG00000158748	75.1711	1.27492	0.287023	4.44186	8.92e-06	0.000854091	HTR6	3362
ENSG00000186583	36.7268	1.27468	0.414305	3.07666	0.00209332	0.0307997	SPATC1	375686
ENSG00000109846	533.373	1.27386	0.256955	4.95753	7.14e-07	0.00013193	CRYAB	1410
ENSG00000181773	438.898	1.27333	0.299387	4.25311	2.11e-05	0.00157439	GPR3	2827
ENSG00000215644	263.539	1.27188	0.372394	3.41542	0.000636837	0.0145971	GCGR	2642
ENSG00000250412	20.5655	1.2703	0.442307	2.872	0.00407883	0.0447256	KLHL2P1	729249
ENSG00000229794	120.421	1.26915	0.415195	3.05677	0.00223739	0.0321518	MTCYBP32	107075231
ENSG00000175874	770.898	1.26598	0.322203	3.92915	8.52e-05	0.00412703	CREG2	200407
ENSG00000248698	116.334	1.26561	0.340336	3.71871	0.000200245	0.00734629	LINC01085	152742
ENSG00000169710	34361.3	1.26402	0.38717	3.26477	0.00109552	0.0205038	FASN	2194
ENSG00000185420	12555.8	1.25682	0.353749	3.55285	0.000381077	0.0105237	SMYD3	64754
ENSG00000184381	1035.95	1.25395	0.306106	4.09645	4.2e-05	0.00256615	PLA2G6	8398
ENSG00000064961	4510.16	1.25124	0.337746	3.70467	0.000211664	0.00757715	HMG20B	10362
ENSG00000220008	80.2432	1.25002	0.440474	2.83789	0.00454132	0.0474758	LINGO3	645191
ENSG00000167995	2023.74	1.24919	0.423734	2.94805	0.00319785	0.0389562	BEST1	7439
ENSG00000181577	4095.34	1.24547	0.384085	3.2427	0.00118402	0.0214711	C6orf223	221416
ENSG00000116990	303.071	1.2396	0.426835	2.90416	0.00368242	0.0420665	MYCL	4610
ENSG00000208024	151.729	1.23838	0.348318	3.55531	0.000377535	0.0104942	MIR199A2	406977
ENSG00000283844	151.729	1.23838	0.348318	3.55531	0.000377535	0.0104942	MIR214	406996
ENSG00000153234	10211.7	1.23721	0.312385	3.96054	7.48e-05	0.0037913	NR4A2	4929
ENSG00000136235	1906.93	1.23616	0.420608	2.93899	0.00329284	0.0397367	GPNMB	10457
ENSG00000270424	47.4191	1.23576	0.413292	2.99003	0.00278951	0.0361823	PAWRP2	100420535
ENSG00000116194	423.517	1.23085	0.344646	3.57136	0.000355135	0.0101071	ANGPTL1	9068
ENSG00000078018	298.662	1.22925	0.386353	3.18168	0.00146424	0.0245517	MAP2	4133
ENSG00000109991	34.8502	1.22831	0.31475	3.90251	9.52e-05	0.00437172	P2RX3	5024
ENSG00000243137	388.172	1.22525	0.288392	4.24856	2.15e-05	0.00159476	PSG4	5672
ENSG00000229401	22.1902	1.22497	0.394879	3.10213	0.00192131	0.0292772	MIR5689HG	106660610
ENSG00000129354	5640.66	1.2195	0.284954	4.27965	1.87e-05	0.0014489	AP1M2	10053
ENSG00000106733	288.182	1.21581	0.321264	3.78446	0.000154045	0.0060784	NMRK1	54981
ENSG00000143367	12513.4	1.21524	0.304398	3.99227	6.54e-05	0.00351171	TUFT1	7286
ENSG00000207606	12513.4	1.21524	0.304398	3.99227	6.54e-05	0.00351171	MIR554	693139
ENSG00000223861	12513.4	1.21524	0.304398	3.99227	6.54e-05	0.00351171	RPS10P6	729374
ENSG00000226761	67.3811	1.21504	0.315416	3.85219	0.000117065	0.00503361	TAS2R46	259292
ENSG00000130066	10191.8	1.20787	0.22705	5.31986	1.04e-07	2.84e-05	SAT1	6303
ENSG00000004799	2669.74	1.20041	0.338327	3.54807	0.000388062	0.0106626	PDK4	5166
ENSG00000170899	146.62	1.19788	0.376619	3.18061	0.00146963	0.0245938	GSTA4	2941
ENSG00000105048	154.964	1.19604	0.268272	4.4583	8.26e-06	0.000835744	TNNT1	7138
ENSG00000227714	35.807	1.19482	0.375979	3.17789	0.00148352	0.0247049	MTND6P18	106478951
ENSG00000230408	47.2596	1.19407	0.298077	4.00592	6.18e-05	0.00337555	BZW1-AS1	101927795
ENSG00000159231	345.655	1.189	0.306369	3.88093	0.000104058	0.00467547	CBR3	874
ENSG00000113161	33307.9	1.18792	0.288176	4.12221	3.75e-05	0.00236697	HMGCR	3156
ENSG00000123983	42128.9	1.18235	0.376808	3.13781	0.00170213	0.0269547	ACSL3	2181
ENSG00000100292	2094.4	1.17972	0.295428	3.99325	6.52e-05	0.00351171	HMOX1	3162
ENSG00000198467	6910.37	1.17826	0.373197	3.15722	0.00159282	0.0258081	TPM2	7169
ENSG00000185739	122.069	1.17754	0.370919	3.17466	0.0015001	0.0248815	SRL	6345
ENSG00000251432	716.427	1.17552	0.294329	3.99389	6.5e-05	0.00351171	LINC02615	100507487
ENSG00000161243	148.99	1.15988	0.225253	5.14925	2.62e-07	5.97e-05	FBXO27	126433
ENSG00000122435	422.772	1.15553	0.324295	3.5632	0.000366367	0.0102928	TRMT13	54482
ENSG00000101868	2235.72	1.15506	0.305628	3.77931	0.000157266	0.00615919	POLA1	5422
ENSG00000251869	2235.72	1.15506	0.305628	3.77931	0.000157266	0.00615919	SCARNA23	677773
ENSG00000142235	319.918	1.15407	0.239692	4.81481	1.47e-06	0.000244694	LMTK3	114783
ENSG00000168672	2970.07	1.15113	0.317812	3.62204	0.000292291	0.00915451	LRATD2	157638
ENSG00000116668	1199.36	1.14818	0.29045	3.95309	7.71e-05	0.00386324	SWT1	54823
ENSG00000073756	3504.24	1.14752	0.37889	3.02863	0.00245665	0.0340891	PTGS2	5743
ENSG00000144278	8769.62	1.14631	0.326624	3.50959	0.000448799	0.0117191	GALNT13	114805
ENSG00000219547	38.7061	1.14455	0.381221	3.00231	0.00267935	0.0355918	RPL17P25	442232
ENSG00000131389	26243	1.14404	0.319737	3.57808	0.000346126	0.00994782	SLC6A6	6533
ENSG00000237853	66.2053	1.14048	0.363855	3.13445	0.00172179	0.0271308	NFIA-AS1	645030
ENSG00000126861	739.315	1.13819	0.33646	3.38286	0.000717364	0.0156603	OMG	4974
ENSG00000160326	427.76	1.13531	0.351465	3.23021	0.001237	0.0219826	SLC2A6	11182
ENSG00000185813	7351.64	1.13394	0.333023	3.405	0.000661647	0.0149412	PCYT2	5833
ENSG00000206588	5397.73	1.13331	0.245908	4.60868	4.05e-06	0.000515702	RNU1-28P	26866
ENSG00000181804	93.8614	1.13163	0.38708	2.92351	0.00346106	0.0408838	SLC9A9	285195
ENSG00000236882	50.7929	1.13148	0.374079	3.02472	0.00248865	0.0343334	LINC01554	202299
ENSG00000107736	66.2138	1.13032	0.366158	3.08698	0.00202202	0.0301979	CDH23	64072
ENSG00000144426	3367.98	1.12869	0.378416	2.98267	0.00285745	0.0365816	NBEAL1	65065
ENSG00000261652	396.216	1.12723	0.259594	4.34228	1.41e-05	0.00118976	C15orf65	145788
ENSG00000235823	2769.31	1.12677	0.271266	4.15376	3.27e-05	0.00212949	OLMALINC	90271
ENSG00000223409	71.6107	1.126	0.364003	3.09337	0.00197897	0.0297585	RPL17P17	100270943
ENSG00000160752	6695.25	1.122	0.372269	3.01395	0.00257873	0.0349333	FDPS	2224
ENSG00000231615	93.6659	1.12131	0.363889	3.08145	0.00205994	0.0306248	LOC646870	646870
ENSG00000139428	5054.48	1.12087	0.283089	3.95942	7.51e-05	0.0037913	MMAB	326625
ENSG00000200274	5054.48	1.12087	0.283089	3.95942	7.51e-05	0.0037913	RNU4-32P	106479572
ENSG00000119630	62.8581	1.11611	0.255269	4.37229	1.23e-05	0.00107183	PGF	5228
ENSG00000163395	625.368	1.11385	0.320577	3.47452	0.000511775	0.0127246	IGFN1	91156
ENSG00000170955	5083.84	1.1138	0.260668	4.27285	1.93e-05	0.00148069	CAVIN3	112464
ENSG00000182795	297.737	1.11228	0.366257	3.03689	0.00239029	0.0334156	C1orf116	79098
ENSG00000241288	43.3081	1.10587	0.391565	2.82423	0.00473946	0.0486364	LINC02614	101927056
ENSG00000220392	89.5811	1.10449	0.358313	3.08247	0.00205288	0.0305545	FCF1P5	106479045
ENSG00000139323	466.587	1.09719	0.298368	3.6773	0.000235718	0.00802237	POC1B	282809
ENSG00000257594	466.587	1.09719	0.298368	3.6773	0.000235718	0.00802237	GALNT4	8693
ENSG00000259075	466.587	1.09719	0.298368	3.6773	0.000235718	0.00802237	POC1B-GALNT4	100528030
ENSG00000100151	1351.47	1.09568	0.385383	2.84308	0.00446795	0.0470085	PICK1	9463
ENSG00000171189	947.391	1.09259	0.331674	3.29415	0.000987201	0.0189635	GRIK1	2897
ENSG00000103089	198.632	1.08975	0.387291	2.81378	0.00489634	0.0496816	FA2H	79152
ENSG00000189180	4205.76	1.08498	0.342443	3.16836	0.001533	0.0251098	ZNF33A	7581
ENSG00000206737	5408.82	1.08278	0.273249	3.9626	7.41e-05	0.00378482	RNVU1-18	26863
ENSG00000182185	12449.5	1.07983	0.310892	3.47334	0.000514026	0.0127246	RAD51B	5890
ENSG00000234718	106.113	1.07872	0.367605	2.93445	0.0033414	0.0400724	RPL23AP51	100271464
ENSG00000133935	9535.02	1.0786	0.264461	4.07847	4.53e-05	0.00272201	ERG28	11161
ENSG00000169946	369.825	1.07621	0.329116	3.27	0.00107547	0.0202587	ZFPM2	23414
ENSG00000186001	1874.26	1.0754	0.372892	2.88395	0.00392718	0.0436094	LRCH3	84859
ENSG00000073350	5746.94	1.07076	0.249828	4.28598	1.82e-05	0.00143061	LLGL2	3993
ENSG00000093144	867.93	1.06889	0.365507	2.9244	0.0034512	0.0408838	ECHDC1	55862
ENSG00000248538	25.6766	1.06854	0.359485	2.97242	0.00295465	0.0372025	LOC157273	157273
ENSG00000136143	127.326	1.06572	0.303115	3.51591	0.000438255	0.0115692	SUCLA2	8803
ENSG00000260388	127.326	1.06572	0.303115	3.51591	0.000438255	0.0115692	LINC00562	100861549
ENSG00000175793	18546.5	1.0649	0.248732	4.28129	1.86e-05	0.0014489	SFN	2810
ENSG00000206596	25834.6	1.06442	0.250652	4.24662	2.17e-05	0.00160414	RNU1-27P	26865
ENSG00000103150	992.078	1.06241	0.297301	3.57351	0.000352223	0.0100523	MLYCD	23417
ENSG00000140961	992.078	1.06241	0.297301	3.57351	0.000352223	0.0100523	OSGIN1	29948
ENSG00000230989	992.078	1.06241	0.297301	3.57351	0.000352223	0.0100523	HSBP1	3281
ENSG00000104549	36435.6	1.06163	0.253831	4.18242	2.88e-05	0.0019465	SQLE	6713
ENSG00000125148	18066.8	1.06156	0.147494	7.19726	6.14e-13	1.24e-09	MT2A	4502
ENSG00000259163	44.5423	1.06031	0.335867	3.15694	0.00159432	0.0258081	LOC101928909	101928909
ENSG00000203737	274.563	1.05746	0.336651	3.14111	0.00168307	0.0267335	GPR52	9293
ENSG00000131263	4044.3	1.05574	0.287676	3.66989	0.000242654	0.00819464	RLIM	51132
ENSG00000207513	7923.41	1.05557	0.271152	3.89289	9.91e-05	0.00450474	RNU1-3	26869
ENSG00000206652	7976.95	1.05311	0.272323	3.86716	0.000110112	0.0048262	RNU1-1	26871
ENSG00000110921	6978.84	1.0522	0.296175	3.55263	0.000381405	0.0105237	MVK	4598
ENSG00000207389	40321.9	1.05109	0.247756	4.24244	2.21e-05	0.00162972	RNU1-4	6060
ENSG00000067798	951.78	1.0501	0.322775	3.25335	0.00114053	0.0210609	NAV3	89795
ENSG00000135116	378.164	1.04868	0.333037	3.14883	0.00163928	0.0262897	HRK	8739
ENSG00000280997	58.5828	1.04857	0.347794	3.01493	0.0025704	0.0348745	CCAT2	101805488
ENSG00000145945	72.1326	1.04821	0.330285	3.17365	0.00150537	0.0249271	FAM50B	26240
ENSG00000130203	67.8367	1.04788	0.308452	3.39721	0.000680756	0.0152006	APOE	348
ENSG00000130208	67.8367	1.04788	0.308452	3.39721	0.000680756	0.0152006	APOC1	341
ENSG00000172409	142.819	1.04541	0.348009	3.00398	0.00266474	0.0355299	CLP1	10978
ENSG00000207005	39789.2	1.04483	0.248195	4.20971	2.56e-05	0.00179876	RNU1-2	26870
ENSG00000167895	33.4323	1.04044	0.339697	3.06284	0.00219249	0.03175	TMC8	147138
ENSG00000146233	839.225	1.0398	0.231504	4.49151	7.07e-06	0.000748852	CYP39A1	51302
ENSG00000225434	485.928	1.03676	0.314484	3.29671	0.000978245	0.0188715	LINC01504	100507540
ENSG00000200070	24.7452	1.03566	0.358249	2.89089	0.00384157	0.0433375	RNU4-80P	106480386
ENSG00000173281	1343.78	1.03245	0.285203	3.62005	0.00029455	0.00915758	PPP1R3B	79660
ENSG00000165046	587.642	1.03199	0.275576	3.74484	0.00018051	0.00684477	LETM2	137994
ENSG00000206585	5053.68	1.02535	0.266377	3.84925	0.000118479	0.00506059	RNVU1-7	26864
ENSG00000171223	13806.4	1.02254	0.250792	4.07724	4.56e-05	0.00273019	JUNB	3726
ENSG00000130513	9670.28	1.02092	0.242746	4.20571	2.6e-05	0.00181148	GDF15	9518
ENSG00000185046	273.015	1.02091	0.337751	3.02268	0.00250547	0.0344388	ANKS1B	56899
ENSG00000184828	77.2466	1.01607	0.302869	3.35482	0.000794166	0.0166445	ZBTB7C	201501
ENSG00000167720	1458.04	1.01553	0.289362	3.50956	0.000448846	0.0117191	SRR	63826
ENSG00000155903	1746.71	1.01495	0.358212	2.83338	0.00460587	0.0478457	RASA2	5922
ENSG00000177842	1286.57	1.00991	0.350121	2.88445	0.00392104	0.0435598	ZNF620	253639
ENSG00000177873	1286.57	1.00991	0.350121	2.88445	0.00392104	0.0435598	ZNF619	285267
ENSG00000198417	268.426	1.00687	0.267283	3.76708	0.000165171	0.00640192	MT1F	4494
ENSG00000088726	65.1368	1.0063	0.336765	2.98813	0.00280686	0.0363176	TMEM40	55287
ENSG00000155115	3454.24	1.00585	0.254729	3.94871	7.86e-05	0.00388312	GTF3C6	112495
ENSG00000174327	1584.48	1.00346	0.245241	4.09172	4.28e-05	0.0026129	SLC16A13	201232
ENSG00000163683	2614.73	0.999753	0.259284	3.85582	0.00011534	0.00498605	SMIM14	201895
ENSG00000163995	473.053	0.997729	0.215826	4.62283	3.79e-06	0.000489296	ABLIM2	84448
ENSG00000174326	78.4873	0.997388	0.295036	3.38056	0.000723376	0.0157391	SLC16A11	162515
ENSG00000139410	216.542	0.996813	0.310166	3.2138	0.00130991	0.0228841	SDSL	113675
ENSG00000231384	127.581	0.995257	0.337297	2.95068	0.00317073	0.0387337	LOC100420939	100420939
ENSG00000249379	187.439	0.995179	0.341592	2.91335	0.0035757	0.041516	LOC105375095	105375095
ENSG00000090013	2938.37	0.990979	0.19031	5.20719	1.92e-07	4.63e-05	BLVRB	645
ENSG00000108175	3479.99	0.982923	0.314153	3.1288	0.00175521	0.0275458	ZMIZ1	57178
ENSG00000101417	337.486	0.978229	0.296664	3.29743	0.000975724	0.0188537	PXMP4	11264
ENSG00000058085	96.8396	0.973161	0.302907	3.21274	0.00131474	0.0229379	LAMC2	3918
ENSG00000166750	7625.27	0.972273	0.248462	3.91317	9.11e-05	0.00432241	SLFN5	162394
ENSG00000168785	707.028	0.969824	0.270521	3.58502	0.000337046	0.00982678	TSPAN5	10098
ENSG00000104415	71.5578	0.969365	0.268302	3.61297	0.00030271	0.00930107	CCN4	8840
ENSG00000264235	159.605	0.968056	0.218394	4.43262	9.31e-06	0.000888306	MYL12-AS1	104968399
ENSG00000175294	166.679	0.966793	0.164467	5.87833	4.14e-09	2.36e-06	CATSPER1	117144
ENSG00000079337	1021.59	0.96367	0.248561	3.87699	0.000105758	0.00470508	RAPGEF3	10411
ENSG00000100300	585.012	0.963144	0.288512	3.33832	0.000842867	0.0173329	TSPO	706
ENSG00000147383	9482.56	0.959949	0.210308	4.56449	5.01e-06	0.000599944	NSDHL	50814
ENSG00000154153	4641.86	0.957811	0.25776	3.7159	0.000202481	0.00739985	RETREG1	54463
ENSG00000183742	196.435	0.95749	0.287302	3.33269	0.000860098	0.0175054	MACC1	346389
ENSG00000076641	1600.71	0.955642	0.27131	3.52233	0.000427771	0.011361	PAG1	55824
ENSG00000110900	191.72	0.955382	0.276168	3.45943	0.000541326	0.0130916	TSPAN11	441631
ENSG00000151726	717.795	0.952392	0.293491	3.24505	0.00117432	0.0213948	ACSL1	2180
ENSG00000148225	170.065	0.948681	0.283445	3.34696	0.000817019	0.0169743	WDR31	114987
ENSG00000238005	168.34	0.938637	0.332726	2.82105	0.00478666	0.0489868	LOC101927851	101927851
ENSG00000160633	1464.91	0.937059	0.316127	2.96418	0.00303487	0.0376675	SAFB	6294
ENSG00000108946	11074.8	0.936555	0.161404	5.80257	6.53e-09	3.17e-06	PRKAR1A	5573
ENSG00000141337	11074.8	0.936555	0.161404	5.80257	6.53e-09	3.17e-06	ARSG	22901
ENSG00000169252	1697.49	0.935306	0.239217	3.90987	9.23e-05	0.00433479	ADRB2	154
ENSG00000166578	273.118	0.934657	0.303421	3.0804	0.00206723	0.0306937	IQCD	115811
ENSG00000229456	200.302	0.929445	0.276694	3.35911	0.000781932	0.0165467	RLIMP1	100533695
ENSG00000137962	8542.99	0.927542	0.276359	3.3563	0.000789933	0.0165829	ARHGAP29	9411
ENSG00000196338	195.812	0.926842	0.281217	3.29583	0.000981315	0.0188919	NLGN3	54413
ENSG00000104432	228.003	0.923596	0.2654	3.48001	0.000501394	0.0125182	IL7	3574
ENSG00000107796	635.55	0.923111	0.284671	3.24273	0.00118391	0.0214711	ACTA2	59
ENSG00000167992	1131.7	0.921127	0.267826	3.43927	0.000583281	0.0137317	VWCE	220001
ENSG00000287978	383.393	0.920375	0.210574	4.37078	1.24e-05	0.00107212	LOC100996756	100996756
ENSG00000100100	190.475	0.917186	0.223395	4.10566	4.03e-05	0.00248915	PIK3IP1	113791
ENSG00000177098	76.0127	0.916995	0.254191	3.6075	0.000309162	0.00942688	SCN4B	6330
ENSG00000105479	47.8179	0.915683	0.295965	3.09389	0.00197551	0.0297574	ODAD1	93233
ENSG00000137752	539.674	0.915293	0.294117	3.112	0.00185823	0.0286317	CASP1	834
ENSG00000204397	539.674	0.915293	0.294117	3.112	0.00185823	0.0286317	CARD16	114769
ENSG00000255221	539.674	0.915293	0.294117	3.112	0.00185823	0.0286317	CARD17	440068
ENSG00000138764	4239.88	0.912374	0.238558	3.82454	0.000131019	0.00537176	CCNG2	901
ENSG00000155792	1782.17	0.912289	0.195688	4.66195	3.13e-06	0.000428068	DEPTOR	64798
ENSG00000122378	9975.24	0.911506	0.202262	4.50655	6.59e-06	0.000726465	PRXL2A	84293
ENSG00000199603	14585.9	0.911067	0.305587	2.98137	0.00286964	0.0366009	RNU6-951P	106481480
ENSG00000227770	14585.9	0.911067	0.305587	2.98137	0.00286964	0.0366009	RPL7P12	100131085
ENSG00000232973	14585.9	0.911067	0.305587	2.98137	0.00286964	0.0366009	CYP1B1-AS1	285154
ENSG00000146006	1872.57	0.910965	0.299504	3.04158	0.00235339	0.0331471	LRRTM2	26045
ENSG00000130612	314.162	0.909878	0.257833	3.52894	0.000417226	0.0111609	CYP2G1P	22952
ENSG00000167578	314.162	0.909878	0.257833	3.52894	0.000417226	0.0111609	RAB4B	53916
ENSG00000261857	314.162	0.909878	0.257833	3.52894	0.000417226	0.0111609	MIA	8190
ENSG00000269858	314.162	0.909878	0.257833	3.52894	0.000417226	0.0111609	EGLN2	112398
ENSG00000164442	7950.7	0.909287	0.267999	3.39287	0.000691636	0.0152765	CITED2	10370
ENSG00000147676	11327.3	0.908426	0.284612	3.19181	0.00141385	0.0240437	MAL2	114569
ENSG00000177511	445.73	0.905847	0.306975	2.95089	0.00316865	0.0387337	ST8SIA3	51046
ENSG00000250479	1384.49	0.905036	0.163946	5.52035	3.38e-08	1.09e-05	CHCHD10	400916
ENSG00000114841	660.062	0.902119	0.29031	3.10743	0.00188721	0.0289592	DNAH1	25981
ENSG00000104870	180.161	0.902051	0.26894	3.3541	0.000796246	0.0166748	FCGRT	2217
ENSG00000267322	698.896	0.901177	0.31551	2.85625	0.00428675	0.0459495	SCARNA17	677769
ENSG00000008441	515.359	0.901103	0.281593	3.20002	0.00137416	0.0235673	NFIX	4784
ENSG00000144824	39847.5	0.900471	0.191274	4.70776	2.5e-06	0.000367144	PHLDB2	90102
ENSG00000240891	39847.5	0.900471	0.191274	4.70776	2.5e-06	0.000367144	PLCXD2	257068
ENSG00000182197	132359	0.898817	0.301024	2.98586	0.00282778	0.0364704	EXT1	2131
ENSG00000228212	1471	0.895724	0.268357	3.33781	0.000844427	0.0173514	OFD1P17	23738
ENSG00000005243	640.43	0.893909	0.234514	3.81176	0.00013798	0.00558735	COPZ2	51226
ENSG00000186687	1309.75	0.893642	0.226095	3.9525	7.73e-05	0.00386553	LYRM7	90624
ENSG00000249618	41.4231	0.892721	0.30205	2.95554	0.00312122	0.0384117	LINC02465	107986313
ENSG00000170989	53.9418	0.892321	0.296244	3.01212	0.00259434	0.0350904	S1PR1	1901
ENSG00000189143	161.291	0.891553	0.260509	3.42235	0.000620834	0.0143152	CLDN4	1364
ENSG00000258130	147.32	0.89109	0.203004	4.38952	1.14e-05	0.0010205	LOC613038	613038
ENSG00000109084	40796.3	0.886067	0.247386	3.58172	0.00034134	0.0098318	TMEM97	27346
ENSG00000198431	64889.2	0.885357	0.251476	3.52065	0.000430491	0.0114102	TXNRD1	7296
ENSG00000140465	284.077	0.881682	0.287419	3.06758	0.00215797	0.0313887	CYP1A1	1543
ENSG00000004777	827.44	0.876692	0.307088	2.85486	0.00430564	0.045951	ARHGAP33	115703
ENSG00000137474	96.2137	0.875733	0.259117	3.37969	0.000725681	0.0157498	MYO7A	4647
ENSG00000104883	130.514	0.873608	0.290974	3.00235	0.00267901	0.0355918	PEX11G	92960
ENSG00000170681	226.685	0.873548	0.157132	5.55932	2.71e-08	9.23e-06	CAVIN4	347273
ENSG00000102805	433.364	0.871701	0.293095	2.97412	0.00293829	0.0370661	CLN5	1203
ENSG00000236051	433.364	0.871701	0.293095	2.97412	0.00293829	0.0370661	MYCBP2-AS1	100874212
ENSG00000187239	5129.23	0.871606	0.249689	3.49077	0.000481632	0.0122256	FNBP1	23048
ENSG00000179397	129.338	0.869516	0.276005	3.15036	0.00163069	0.026219	CATSPERE	257044
ENSG00000187678	903.479	0.869268	0.144139	6.03075	1.63e-09	1.1e-06	SPRY4	81848
ENSG00000128833	4884.88	0.865075	0.209163	4.13588	3.54e-05	0.00226852	MYO5C	55930
ENSG00000048052	988.227	0.861558	0.285985	3.0126	0.00259019	0.0350524	HDAC9	9734
ENSG00000155066	243.666	0.861249	0.304284	2.83041	0.00464889	0.048121	PROM2	150696
ENSG00000162923	71.3164	0.860773	0.260977	3.29827	0.000972827	0.0188391	WDR26	80232
ENSG00000266618	71.3164	0.860773	0.260977	3.29827	0.000972827	0.0188391	MIR4742	100616468
ENSG00000139344	469.011	0.855832	0.202809	4.2199	2.44e-05	0.00174278	AMDHD1	144193
ENSG00000117266	1615.97	0.855672	0.264563	3.23428	0.00121948	0.0218873	CDK18	5129
ENSG00000095464	67.3901	0.854531	0.290927	2.93727	0.0033112	0.0398559	PDE6C	5146
ENSG00000102796	198.599	0.852995	0.272164	3.13412	0.0017237	0.0271308	DHRS12	79758
ENSG00000281106	198.599	0.852995	0.272164	3.13412	0.0017237	0.0271308	TMEM272	283521
ENSG00000136854	9358.71	0.852677	0.238677	3.57251	0.000353575	0.0100736	STXBP1	6812
ENSG00000233690	64.6689	0.852098	0.299188	2.84804	0.004399	0.0464623	EBAG9P1	100422254
ENSG00000167799	323.876	0.851508	0.286357	2.97359	0.00294338	0.0370962	NUDT8	254552
ENSG00000128165	537.022	0.851414	0.242429	3.51202	0.000444717	0.0116928	ADM2	79924
ENSG00000152229	2139.13	0.8487	0.253455	3.34852	0.000812439	0.0169328	PSTPIP2	9050
ENSG00000145362	527.253	0.846579	0.299342	2.82813	0.00468206	0.0483324	ANK2	287
ENSG00000225222	7557.76	0.845696	0.289279	2.92346	0.00346161	0.0408838	CHCHD4P5	106479039
ENSG00000164120	631.326	0.84416	0.164587	5.12895	2.91e-07	6.42e-05	HPGD	3248
ENSG00000070540	2422.5	0.843662	0.272483	3.0962	0.00196018	0.0295434	WIPI1	55062
ENSG00000162545	2453.06	0.841921	0.217872	3.86428	0.000111415	0.00486446	CAMK2N1	55450
ENSG00000226237	601.126	0.840476	0.25336	3.31732	0.000908864	0.0181496	GAS1RR	100506834
ENSG00000138798	186.657	0.839708	0.210687	3.98557	6.73e-05	0.003583	EGF	1950
ENSG00000178172	320.353	0.836934	0.264296	3.16665	0.00154206	0.025164	SPINK6	404203
ENSG00000268621	21141.9	0.836128	0.211797	3.94779	7.89e-05	0.00388312	IGFL2-AS1	645553
ENSG00000158987	14867.1	0.834933	0.271754	3.07238	0.00212356	0.0309814	RAPGEF6	51735
ENSG00000217128	14867.1	0.834933	0.271754	3.07238	0.00212356	0.0309814	FNIP1	96459
ENSG00000156453	87.345	0.834548	0.222113	3.75731	0.000171748	0.0065887	PCDH1	5097
ENSG00000111348	528.452	0.833124	0.219254	3.79981	0.000144809	0.00580122	ARHGDIB	397
ENSG00000111875	3526.35	0.832974	0.149813	5.56009	2.7e-08	9.23e-06	ASF1A	25842
ENSG00000284138	173.107	0.831247	0.212643	3.90912	9.26e-05	0.00433845	ATP6V0CP4	112436690
ENSG00000151500	1480.56	0.830345	0.175268	4.73757	2.16e-06	0.000328073	THYN1	29087
ENSG00000133739	1110.2	0.829112	0.183469	4.51908	6.21e-06	0.000717934	LRRCC1	85444
ENSG00000175455	4853.44	0.828635	0.232609	3.56235	0.000367556	0.0103041	CCDC14	64770
ENSG00000099260	2731.39	0.828258	0.238803	3.46837	0.000523631	0.0128292	PALMD	54873
ENSG00000225872	86.6295	0.828085	0.284314	2.91257	0.00358466	0.0415909	LINC01529	644050
ENSG00000104765	12356	0.827405	0.208304	3.9721	7.12e-05	0.00367357	BNIP3L	665
ENSG00000114446	809.423	0.825237	0.158271	5.21407	1.85e-07	4.53e-05	IFT57	55081
ENSG00000224081	335.791	0.819409	0.256175	3.19862	0.00138086	0.0236513	SLC44A3-AS1	101928079
ENSG00000145287	3079.89	0.819061	0.254439	3.21908	0.00128602	0.0225719	PLAC8	51316
ENSG00000071967	8918.37	0.818764	0.247427	3.30912	0.000935901	0.0184729	CYBRD1	79901
ENSG00000250303	388.177	0.81762	0.211137	3.87246	0.000107744	0.00477193	LINC02762	283140
ENSG00000077152	2458.38	0.816276	0.190706	4.28028	1.87e-05	0.0014489	UBE2T	29089
ENSG00000258150	100.097	0.813477	0.202149	4.02414	5.72e-05	0.00319933	LOC388242	388242
ENSG00000244398	8861.41	0.810708	0.231505	3.50191	0.000461937	0.0119034	RPL36AP37	729362
ENSG00000109929	29081.3	0.810011	0.254403	3.18396	0.00145274	0.0244359	SC5D	6309
ENSG00000180964	3688.35	0.806184	0.181139	4.45065	8.56e-06	0.000835744	TCEAL8	90843
ENSG00000109944	401.243	0.805698	0.171731	4.69163	2.71e-06	0.000379335	JHY	79864
ENSG00000282556	355.993	0.803206	0.198011	4.05638	4.98e-05	0.00289978	LOC101927825	101927825
ENSG00000153363	486.75	0.799348	0.245138	3.26081	0.00111094	0.0206893	LINC00467	84791
ENSG00000179476	281.374	0.796777	0.247439	3.22009	0.00128148	0.0225139	C14orf28	122525
ENSG00000143971	2514.82	0.794845	0.221349	3.59091	0.000329523	0.0096719	ETAA1	54465
ENSG00000272767	165.933	0.794361	0.279502	2.84206	0.00448226	0.0471185	JMJD1C-AS1	84989
ENSG00000244921	93.1158	0.791923	0.242306	3.26828	0.00108204	0.0203241	MTCYBP18	107075130
ENSG00000065833	15814	0.791484	0.191835	4.12587	3.69e-05	0.00234061	ME1	4199
ENSG00000142867	3183.88	0.790593	0.194499	4.06477	4.81e-05	0.00280361	BCL10	8915
ENSG00000106823	573.166	0.790569	0.276682	2.85732	0.00427239	0.0459081	ECM2	1842
ENSG00000171388	217.938	0.788751	0.262989	2.99918	0.0027071	0.0356418	APLN	8862
ENSG00000161011	10690.6	0.788058	0.245972	3.20385	0.00135604	0.0234114	SQSTM1	8878
ENSG00000234369	250.262	0.786059	0.220577	3.56365	0.000365734	0.010286	TATDN1P1	728737
ENSG00000137393	3050.1	0.781184	0.230819	3.3844	0.000713341	0.0155984	RNF144B	255488
ENSG00000169715	4794.19	0.777661	0.221803	3.50608	0.000454755	0.0118381	MT1E	4493
ENSG00000185515	8279.8	0.777165	0.276043	2.81538	0.00487203	0.0495128	BRCC3	79184
ENSG00000173681	1746.58	0.776368	0.150226	5.16799	2.37e-07	5.45e-05	BCLAF3	256643
ENSG00000198142	4603.81	0.775478	0.212088	3.65641	0.000255777	0.00843163	SOWAHC	65124
ENSG00000136492	21070	0.774938	0.254007	3.05085	0.00228193	0.0325954	BRIP1	83990
ENSG00000154310	310.808	0.774746	0.190242	4.07243	4.65e-05	0.00273624	TNIK	23043
ENSG00000214145	508.183	0.774554	0.221924	3.49018	0.000482699	0.0122256	LINC00887	100131551
ENSG00000125868	53817.5	0.77406	0.245446	3.15369	0.00161219	0.0260011	DSTN	11034
ENSG00000174501	2259.51	0.773679	0.220319	3.51163	0.000445373	0.0116966	ANKRD36C	400986
ENSG00000108639	3262.2	-0.483412	0.154208	-3.13479	0.00171975	0.0271308	SYNGR2	9144
ENSG00000172508	285.988	-0.484625	0.155867	-3.10923	0.00187574	0.0288508	CARNS1	57571
ENSG00000136908	3944.62	-0.485047	0.1546	-3.13742	0.0017044	0.0269743	DPM2	8818
ENSG00000132522	4311	-0.486607	0.149785	-3.24871	0.00115929	0.0212132	GPS2	2874
ENSG00000215041	4311	-0.486607	0.149785	-3.24871	0.00115929	0.0212132	NEURL4	84461
ENSG00000181409	2465.72	-0.491668	0.107477	-4.57465	4.77e-06	0.000574181	AATK	9625
ENSG00000142798	87301.3	-0.492092	0.108121	-4.55131	5.33e-06	0.00063299	HSPG2	3339
ENSG00000213904	468.048	-0.493857	0.149367	-3.30634	0.00094523	0.0185382	LIPE-AS1	100996307
ENSG00000185024	3948.15	-0.494653	0.156518	-3.16036	0.00157572	0.0256018	BRF1	2972
ENSG00000100767	1481.33	-0.494866	0.126028	-3.92663	8.61e-05	0.00416007	PAPLN	89932
ENSG00000114739	3817.77	-0.495911	0.137242	-3.61341	0.000302191	0.009296	ACVR2B	93
ENSG00000148400	10144.7	-0.497281	0.113681	-4.37435	1.22e-05	0.00106532	NOTCH1	4851
ENSG00000118705	54959.9	-0.498279	0.156783	-3.17815	0.00148216	0.0247049	RPN2	6185
ENSG00000100413	8122.15	-0.498368	0.167804	-2.96995	0.00297851	0.0373238	POLR3H	171568
ENSG00000143641	74635.8	-0.498373	0.165415	-3.01286	0.00258795	0.0350402	GALNT2	2590
ENSG00000184402	10060.2	-0.499466	0.176954	-2.82257	0.00476399	0.04885	SS18L1	26039
ENSG00000140015	2389.61	-0.49951	0.157216	-3.17723	0.00148691	0.0247311	KCNH5	27133
ENSG00000148411	12757	-0.500962	0.154686	-3.23856	0.00120133	0.0216801	NACC2	138151
ENSG00000123384	65683.7	-0.502929	0.148937	-3.37679	0.000733372	0.0158515	LRP1	4035
ENSG00000221365	65683.7	-0.502929	0.148937	-3.37679	0.000733372	0.0158515	MIR1228	100302201
ENSG00000160959	7320.09	-0.504625	0.163126	-3.09347	0.0019783	0.0297585	LRRC14	9684
ENSG00000129351	33882.1	-0.505799	0.167668	-3.01667	0.00255571	0.0347831	ILF3	3609
ENSG00000129353	33882.1	-0.505799	0.167668	-3.01667	0.00255571	0.0347831	SLC44A2	57153
ENSG00000133398	5206.96	-0.507202	0.172505	-2.94021	0.00327985	0.0396058	MED10	84246
ENSG00000103253	1911.69	-0.507974	0.12819	-3.96267	7.41e-05	0.00378482	HAGHL	84264
ENSG00000041988	1283.56	-0.508022	0.152683	-3.32729	0.00087695	0.0176624	THAP3	90326
ENSG00000148297	3328.55	-0.510711	0.153605	-3.32483	0.000884715	0.0177892	MED22	6837
ENSG00000179240	1263.09	-0.513064	0.127166	-4.03459	5.47e-05	0.00310659	GVQW3	100506127
ENSG00000173621	7535.21	-0.5133	0.174948	-2.93401	0.00334612	0.0401107	LRFN4	78999
ENSG00000160401	1119.5	-0.516011	0.129911	-3.97204	7.13e-05	0.00367357	CFAP157	286207
ENSG00000158850	6084.64	-0.517716	0.167068	-3.09884	0.00194283	0.0294055	B4GALT3	8703
ENSG00000213995	4618.18	-0.51971	0.147283	-3.52865	0.000417684	0.0111609	NAXD	55739
ENSG00000253710	5963.81	-0.520511	0.183518	-2.8363	0.00456399	0.0475218	ALG11	440138
ENSG00000253797	5963.81	-0.520511	0.183518	-2.8363	0.00456399	0.0475218	UTP14C	9724
ENSG00000185730	1691.12	-0.522575	0.183354	-2.85009	0.00437062	0.0463361	ZNF696	79943
ENSG00000237017	148.742	-0.524309	0.168932	-3.10367	0.00191133	0.0291759	PRPF31-AS1	121832802
ENSG00000197345	1557.98	-0.525205	0.155284	-3.38223	0.000718987	0.0156797	MRPL21	219927
ENSG00000272620	5617.56	-0.529053	0.147304	-3.59157	0.000328697	0.00966928	AFAP1-AS1	84740
ENSG00000204174	1194.11	-0.530687	0.12447	-4.26357	2.01e-05	0.00151524	NPY4R	5540
ENSG00000100263	5062.89	-0.53166	0.168273	-3.1595	0.00158041	0.025662	RHBDD3	25807
ENSG00000149380	625.485	-0.531965	0.155494	-3.42113	0.00062362	0.0143668	P4HA3	283208
ENSG00000144647	3515.49	-0.533272	0.178238	-2.99192	0.00277232	0.0361269	POMGNT2	84892
ENSG00000083444	33173.3	-0.536069	0.106582	-5.02963	4.91e-07	9.77e-05	PLOD1	5351
ENSG00000072818	749.024	-0.536509	0.169122	-3.17233	0.00151222	0.0249415	ACAP1	9744
ENSG00000127586	5856.1	-0.537174	0.190899	-2.81392	0.00489412	0.0496796	CHTF18	63922
ENSG00000140443	36884.2	-0.539755	0.182073	-2.96449	0.00303181	0.0376501	IGF1R	3480
ENSG00000117318	9932.65	-0.540377	0.163854	-3.29792	0.00097403	0.0188485	ID3	3399
ENSG00000283429	102.934	-0.54156	0.171012	-3.16679	0.00154132	0.025164	MIR1244-3	100422872
ENSG00000116478	1268.06	-0.542335	0.17875	-3.03403	0.00241307	0.0336266	HDAC1	3065
ENSG00000169660	1444.13	-0.54302	0.141239	-3.8447	0.000120699	0.00511656	HEXD	284004
ENSG00000099904	3474.5	-0.544157	0.136373	-3.9902	6.6e-05	0.00353532	ZDHHC8	29801
ENSG00000166860	2074.6	-0.544237	0.160045	-3.40052	0.000672582	0.0150902	ZBTB39	9880
ENSG00000149930	1418.07	-0.545076	0.149988	-3.63413	0.000278917	0.00892536	TAOK2	9344
ENSG00000144749	4197.58	-0.545314	0.149395	-3.65016	0.000262076	0.00859609	LRIG1	26018
ENSG00000203993	3606.69	-0.547356	0.130982	-4.17886	2.93e-05	0.00196113	ARRDC1-AS1	85026
ENSG00000103226	12615.6	-0.548206	0.169673	-3.23096	0.00123376	0.0219826	NOMO3	408050
ENSG00000257381	12615.6	-0.548206	0.169673	-3.23096	0.00123376	0.0219826	MIR3179-2	100422886
ENSG00000178412	229.496	-0.5483	0.16453	-3.33253	0.000860591	0.0175054	LOC284241	284241
ENSG00000130768	412.515	-0.549593	0.13692	-4.01398	5.97e-05	0.0032981	SMPDL3B	27293
ENSG00000160957	21899.1	-0.552315	0.14672	-3.76442	0.000166936	0.00645124	RECQL4	9401
ENSG00000176248	6081.67	-0.55583	0.194515	-2.85752	0.00426964	0.0458973	ANAPC2	29882
ENSG00000168140	4416.34	-0.557791	0.183383	-3.04167	0.00235272	0.0331471	VASN	114990
ENSG00000141294	182.963	-0.557978	0.162702	-3.42946	0.000604784	0.0140418	LRRC46	90506
ENSG00000167470	3528.71	-0.55897	0.167945	-3.3283	0.00087378	0.0176369	MIDN	90007
ENSG00000169696	7256.17	-0.559796	0.168245	-3.32726	0.00087706	0.0176624	ASPSCR1	79058
ENSG00000121281	3397.47	-0.560513	0.15138	-3.7027	0.000213321	0.00760193	ADCY7	113
ENSG00000274969	3397.47	-0.560513	0.15138	-3.7027	0.000213321	0.00760193	MIR6771	102465462
ENSG00000154096	289.735	-0.56102	0.164907	-3.40204	0.000668844	0.015039	THY1	7070
ENSG00000137185	3984.22	-0.561533	0.184779	-3.03895	0.00237402	0.0333125	ZSCAN9	7746
ENSG00000132361	3661.52	-0.566949	0.178725	-3.17219	0.00151295	0.0249415	CLUH	23277
ENSG00000107159	1310.24	-0.567027	0.197403	-2.87243	0.00407327	0.0446834	CA9	768
ENSG00000137642	12003.9	-0.567063	0.140636	-4.03214	5.53e-05	0.00312569	SORL1	6653
ENSG00000182749	2525.21	-0.567409	0.192506	-2.94748	0.0032037	0.038981	PAQR7	164091
ENSG00000109323	5270.67	-0.569238	0.195752	-2.90796	0.00363798	0.0418503	MANBA	4126
ENSG00000230069	5270.67	-0.569238	0.195752	-2.90796	0.00363798	0.0418503	LRRC37A15P	106481796
ENSG00000248971	5270.67	-0.569238	0.195752	-2.90796	0.00363798	0.0418503	KRT8P46	100418744
ENSG00000261924	583.076	-0.572545	0.147579	-3.87959	0.000104634	0.00468909	LOC400627	400627
ENSG00000235173	6686.39	-0.572568	0.16934	-3.38118	0.000721754	0.0157169	HGH1	51236
ENSG00000146477	1016.62	-0.574422	0.17064	-3.36628	0.000761902	0.0163603	SLC22A3	6581
ENSG00000184281	2998.1	-0.574948	0.199322	-2.88452	0.00392011	0.0435598	TSSC4	10078
ENSG00000240418	91.3381	-0.57687	0.19336	-2.9834	0.00285061	0.0365591	RPS2P51	729679
ENSG00000147166	150.557	-0.579968	0.183371	-3.1628	0.00156258	0.0254671	ITGB1BP2	26548
ENSG00000257285	382.004	-0.582377	0.194605	-2.99261	0.00276601	0.0360935	PRMT5-DT	101926933
ENSG00000137216	4689.69	-0.582632	0.201387	-2.8931	0.00381461	0.043128	TMEM63B	55362
ENSG00000167721	143.95	-0.582715	0.206499	-2.82188	0.00477432	0.0488986	TSR1	55720
ENSG00000231609	147.273	-0.583064	0.17623	-3.30855	0.000937812	0.0184746	EHBP1-AS1	100132215
ENSG00000246339	177.699	-0.584831	0.188786	-3.09785	0.00194932	0.0294055	EXTL3-AS1	101929402
ENSG00000230844	700.244	-0.587386	0.19849	-2.95927	0.00308373	0.0380607	ZNF674-AS1	401588
ENSG00000103512	19361.8	-0.587683	0.205844	-2.855	0.00430374	0.045951	NOMO1	23420
ENSG00000072071	1396.91	-0.588281	0.199989	-2.94157	0.00326558	0.0394879	ADGRL1	22859
ENSG00000282458	1699.87	-0.589215	0.13628	-4.32355	1.54e-05	0.00126696	WASH5P	375690
ENSG00000173530	4945.13	-0.589548	0.201453	-2.92647	0.0034283	0.040779	TNFRSF10D	8793
ENSG00000169627	1754.87	-0.589682	0.149131	-3.95412	7.68e-05	0.0038541	BOLA2	552900
ENSG00000103197	2809.86	-0.589843	0.177066	-3.33119	0.000864743	0.0175354	TSC2	7249
ENSG00000218018	155.809	-0.591205	0.195423	-3.02526	0.00248419	0.03429	RBM38-AS1	100291105
ENSG00000179627	514.547	-0.591291	0.159401	-3.70946	0.000207705	0.00749681	ZBTB42	100128927
ENSG00000130304	2067.17	-0.596873	0.194355	-3.07105	0.00213307	0.0310436	SLC27A1	376497
ENSG00000062716	45977.2	-0.596892	0.166648	-3.58176	0.000341284	0.0098318	VMP1	81671
ENSG00000284190	45977.2	-0.596892	0.166648	-3.58176	0.000341284	0.0098318	MIR21	406991
ENSG00000187720	7847.66	-0.59743	0.20115	-2.97006	0.00297738	0.0373238	THSD4	79875
ENSG00000197530	3990.62	-0.598022	0.155902	-3.8359	0.000125107	0.00524091	MIB2	142678
ENSG00000180822	2359.08	-0.59822	0.207822	-2.87852	0.00399541	0.0441059	PSMG4	389362
ENSG00000116574	623.806	-0.600306	0.179655	-3.34143	0.000833468	0.017191	RHOU	58480
ENSG00000145506	472.595	-0.600968	0.185365	-3.24208	0.00118663	0.0214828	NKD2	85409
ENSG00000099625	948.778	-0.601042	0.113286	-5.30555	1.12e-07	2.98e-05	CBARP	255057
ENSG00000144893	392.096	-0.601225	0.202514	-2.96881	0.00298958	0.0373912	MED12L	116931
ENSG00000199994	392.096	-0.601225	0.202514	-2.96881	0.00298958	0.0373912	RNA5SP145	100873412
ENSG00000167971	293.412	-0.605697	0.179476	-3.37482	0.000738653	0.0159394	CASKIN1	57524
ENSG00000175787	471.913	-0.608495	0.16617	-3.66188	0.000250371	0.00835084	ZNF169	169841
ENSG00000198933	511.583	-0.608996	0.189208	-3.21866	0.0012879	0.0225899	TBKBP1	9755
ENSG00000076351	12881.4	-0.611803	0.21181	-2.88846	0.00387138	0.0433609	SLC46A1	113235
ENSG00000228812	569.756	-0.613595	0.133196	-4.60671	4.09e-06	0.000515702	LAMA5-AS1	101928158
ENSG00000236144	2399.8	-0.616358	0.191953	-3.21099	0.0013228	0.023048	TMEM147-AS1	100506469
ENSG00000115353	971.667	-0.621613	0.161785	-3.84223	0.000121924	0.00515182	TACR1	6869
ENSG00000090447	3241.16	-0.621749	0.216292	-2.87458	0.0040457	0.0444552	TFAP4	7023
ENSG00000163257	11657.3	-0.622373	0.174601	-3.56454	0.000364494	0.0102621	DCAF16	54876
ENSG00000064932	6355.17	-0.623086	0.202697	-3.07398	0.00211225	0.0309294	SBNO2	22904
ENSG00000090971	752.579	-0.623679	0.198141	-3.14765	0.00164587	0.0263191	NAT14	57106
ENSG00000197483	752.579	-0.623679	0.198141	-3.14765	0.00164587	0.0263191	ZNF628	89887
ENSG00000215808	917.47	-0.625413	0.180722	-3.46064	0.000538902	0.0130812	LINC01139	339535
ENSG00000161638	13676.6	-0.626145	0.208747	-2.99955	0.00270382	0.0356309	ITGA5	3678
ENSG00000162576	1560.07	-0.626811	0.162422	-3.85916	0.000113776	0.00494285	MXRA8	54587
ENSG00000069424	2671.14	-0.627748	0.176545	-3.55574	0.000376912	0.0104942	KCNAB2	8514
ENSG00000213918	2870.28	-0.629128	0.20449	-3.07656	0.00209401	0.0307997	DNASE1	1773
ENSG00000171246	83902	-0.630955	0.201328	-3.13396	0.00172463	0.0271308	NPTX1	4884
ENSG00000248677	277.502	-0.632491	0.194025	-3.25985	0.00111471	0.02073	LINC02102	100505625
ENSG00000167703	1133.7	-0.632626	0.106644	-5.93212	2.99e-09	1.87e-06	SLC43A2	124935
ENSG00000201302	240.658	-0.634105	0.21515	-2.94727	0.00320592	0.038982	SNORA65	26783
ENSG00000232775	286.377	-0.635013	0.216392	-2.93455	0.0033403	0.0400724	BMS1P22	106480334
ENSG00000059145	4305.67	-0.637895	0.1931	-3.30344	0.000955053	0.0186047	UNKL	64718
ENSG00000141562	228.23	-0.639897	0.223276	-2.86595	0.00415763	0.0452869	NARF	26502
ENSG00000240668	109.159	-0.640374	0.222498	-2.87811	0.00400068	0.0441454	KRT8P36	100418748
ENSG00000185818	1939.93	-0.640401	0.216836	-2.95339	0.00314305	0.0385752	NAT8L	339983
ENSG00000132773	2639.67	-0.641955	0.22726	-2.82476	0.00473157	0.0486267	TOE1	114034
ENSG00000112139	168.928	-0.642355	0.220161	-2.91767	0.00352662	0.0412451	MDGA1	266727
ENSG00000250295	529.03	-0.64305	0.204985	-3.13706	0.00170652	0.0269916	RDH10-AS1	101926926
ENSG00000213468	1668.79	-0.643445	0.202873	-3.17167	0.00151567	0.0249506	FIRRE	286467
ENSG00000162775	287.283	-0.646528	0.21506	-3.00626	0.0026448	0.035441	RBM15	64783
ENSG00000149716	1852.49	-0.649673	0.199132	-3.26253	0.00110421	0.0205932	LTO1	220064
ENSG00000108557	6062	-0.650628	0.21858	-2.97661	0.00291452	0.0369633	RAI1	10743
ENSG00000164638	166.204	-0.651847	0.168167	-3.87619	0.000106105	0.00471101	SLC29A4	222962
ENSG00000232217	69.1057	-0.653744	0.215094	-3.03934	0.00237101	0.033308	FTLP8	100462790
ENSG00000168079	531.591	-0.655038	0.223796	-2.92694	0.0034231	0.0407356	SCARA5	286133
ENSG00000268858	4428.93	-0.656047	0.170447	-3.84899	0.000118608	0.00506059	LOC112268269	112268269
ENSG00000180539	208.221	-0.657422	0.187723	-3.50209	0.000461631	0.0119034	LINC02908	401563
ENSG00000188763	198.104	-0.657809	0.168397	-3.9063	9.37e-05	0.00433845	FZD9	8326
ENSG00000181350	4615.86	-0.657838	0.206668	-3.18307	0.00145723	0.02448	LRRC75A	388341
ENSG00000146674	31816.5	-0.661668	0.217788	-3.03813	0.00238051	0.0333679	IGFBP3	3486
ENSG00000101181	5985.99	-0.663912	0.15491	-4.28578	1.82e-05	0.00143061	MTG2	26164
ENSG00000184675	4472.25	-0.664937	0.225172	-2.95301	0.00314689	0.0385861	AMER1	139285
ENSG00000100836	5920.58	-0.665371	0.173351	-3.8383	0.00012389	0.0052014	PABPN1	8106
ENSG00000129473	5920.58	-0.665371	0.173351	-3.8383	0.00012389	0.0052014	BCL2L2	599
ENSG00000258643	5920.58	-0.665371	0.173351	-3.8383	0.00012389	0.0052014	BCL2L2-PABPN1	100529063
ENSG00000169242	9179.05	-0.666642	0.232653	-2.86539	0.00416494	0.0453071	EFNA1	1942
ENSG00000134569	1425.04	-0.66709	0.199453	-3.34459	0.000824035	0.0170257	LRP4	4038
ENSG00000179886	2798.23	-0.668194	0.156456	-4.27081	1.95e-05	0.00148789	TIGD5	84948
ENSG00000105699	2094.83	-0.669004	0.236249	-2.83178	0.00462899	0.0480326	LSR	51599
ENSG00000185585	15157.3	-0.671241	0.217006	-3.0932	0.00198012	0.0297585	OLFML2A	169611
ENSG00000135637	732.499	-0.671343	0.166203	-4.03929	5.36e-05	0.00306501	CCDC142	84865
ENSG00000204822	732.499	-0.671343	0.166203	-4.03929	5.36e-05	0.00306501	MRPL53	116540
ENSG00000169139	1061.4	-0.672116	0.194643	-3.45306	0.000554263	0.0133064	UBE2V2	7336
ENSG00000103034	1021.58	-0.673308	0.197497	-3.40921	0.000651508	0.0148142	NDRG4	65009
ENSG00000250133	2629.51	-0.679417	0.220814	-3.07687	0.00209183	0.0307997	HOXC-AS2	100874364
ENSG00000250451	2629.51	-0.679417	0.220814	-3.07687	0.00209183	0.0307997	HOXC-AS1	100874363
ENSG00000166166	1712.03	-0.679967	0.203002	-3.34955	0.000809415	0.0168966	TRMT61A	115708
ENSG00000188157	55332.2	-0.681165	0.111926	-6.08582	1.16e-09	8e-07	AGRN	375790
ENSG00000283828	137.464	-0.681282	0.216159	-3.15177	0.00162285	0.0261249	LOC102724474	102724474
ENSG00000114790	122.527	-0.686258	0.235487	-2.91421	0.00356594	0.0415129	ARHGEF26	26084
ENSG00000114554	10826.4	-0.686282	0.220417	-3.11357	0.0018484	0.0286148	PLXNA1	5361
ENSG00000246308	74.4295	-0.686654	0.23844	-2.87977	0.00397961	0.0439879	LOC101928053	101928053
ENSG00000152683	4702.76	-0.688974	0.172789	-3.98738	6.68e-05	0.00357037	SLC30A6	55676
ENSG00000248546	126.132	-0.691469	0.217472	-3.17957	0.00147492	0.0246509	ANP32C	23520
ENSG00000121671	1728.54	-0.691709	0.218215	-3.16985	0.00152516	0.0250379	CRY2	1408
ENSG00000109736	3634.89	-0.6922	0.13901	-4.97949	6.38e-07	0.000120348	MFSD10	10227
ENSG00000104081	1356.62	-0.695103	0.164437	-4.22717	2.37e-05	0.00170131	BMF	90427
ENSG00000284203	1783.33	-0.698366	0.227068	-3.07558	0.00210094	0.0308325	MIR29B2	407025
ENSG00000284214	1783.33	-0.698366	0.227068	-3.07558	0.00210094	0.0308325	MIR29C	407026
ENSG00000164849	287.673	-0.699944	0.217909	-3.2121	0.0013177	0.0229744	GPR146	115330
ENSG00000153404	3236.45	-0.702481	0.222814	-3.15277	0.00161728	0.0260512	PLEKHG4B	153478
ENSG00000196700	7975.88	-0.702639	0.216536	-3.2449	0.00117492	0.0213948	ZNF512B	57473
ENSG00000180846	161.29	-0.704062	0.232815	-3.02413	0.00249351	0.0343824	CSNK1G2-AS1	255193
ENSG00000226167	172.309	-0.706475	0.222637	-3.17322	0.0015076	0.0249271	AP4B1-AS1	100287722
ENSG00000244280	220.111	-0.706667	0.236798	-2.98427	0.0028426	0.0365591	ECEL1P2	347694
ENSG00000172404	245.397	-0.710184	0.2298	-3.09044	0.00199858	0.0299531	DNAJB7	150353
ENSG00000183655	1218.21	-0.714729	0.184355	-3.87691	0.000105793	0.00470508	KLHL25	64410
ENSG00000162931	352.743	-0.716472	0.225805	-3.17297	0.00150889	0.0249289	TRIM17	51127
ENSG00000005007	18537.9	-0.71863	0.240121	-2.99278	0.00276451	0.0360935	UPF1	5976
ENSG00000215912	219.5	-0.720406	0.244619	-2.94501	0.00322944	0.0391954	TTC34	100287898
ENSG00000103335	34733.7	-0.723844	0.198549	-3.64567	0.000266695	0.00869325	PIEZO1	9780
ENSG00000284585	34733.7	-0.723844	0.198549	-3.64567	0.000266695	0.00869325	MIR4722	100616167
ENSG00000280213	1455.17	-0.727775	0.180139	-4.04007	5.34e-05	0.00306501	UCKL1-AS1	100113386
ENSG00000099994	7378.36	-0.728263	0.246253	-2.95738	0.00310264	0.0382581	SUSD2	56241
ENSG00000160472	290.214	-0.72904	0.151922	-4.79877	1.6e-06	0.000258581	TMEM190	147744
ENSG00000120334	504.106	-0.731035	0.240676	-3.03742	0.00238615	0.0333866	CENPL	91687
ENSG00000267226	192.675	-0.732746	0.243028	-3.01507	0.00256924	0.0348745	MALT1-AS1	101927322
ENSG00000198732	51435.7	-0.7336	0.256968	-2.85484	0.0043059	0.045951	SMOC1	64093
ENSG00000100105	5251.63	-0.73973	0.246225	-3.00429	0.00266199	0.0355294	PATZ1	23598
ENSG00000131797	926.856	-0.739767	0.210708	-3.51087	0.000446647	0.0116966	CLUHP3	100132341
ENSG00000167491	7736.2	-0.740245	0.2234	-3.31354	0.000921227	0.0182852	GATAD2A	54815
ENSG00000251151	631.295	-0.742383	0.26269	-2.82608	0.00471209	0.0484883	HOXC-AS3	100874365
ENSG00000141756	31811.2	-0.744267	0.262843	-2.83161	0.00463149	0.0480357	FKBP10	60681
ENSG00000172530	2900.84	-0.744511	0.236662	-3.14589	0.00165584	0.0264129	BANP	54971
ENSG00000158966	3685.16	-0.745866	0.240062	-3.10697	0.00189017	0.0289711	CACHD1	57685
ENSG00000183535	73.9429	-0.747438	0.259555	-2.87969	0.00398066	0.0439879	COL18A1-AS1	378832
ENSG00000112852	845.168	-0.751189	0.187302	-4.01058	6.06e-05	0.00333903	PCDHB2	56133
ENSG00000132622	93.768	-0.751305	0.20014	-3.75389	0.000174111	0.00665989	HSPA12B	116835
ENSG00000101246	4390.41	-0.754102	0.162583	-4.63827	3.51e-06	0.000470357	ARFRP1	10139
ENSG00000215914	106.235	-0.754927	0.236622	-3.19044	0.00142058	0.0241269	MMP23A	8511
ENSG00000269720	2117.95	-0.755988	0.178372	-4.23826	2.25e-05	0.00164649	CCDC194	110806280
ENSG00000131634	111.078	-0.757816	0.266794	-2.84046	0.00450487	0.0471888	TMEM204	79652
ENSG00000149634	89.3026	-0.759078	0.233744	-3.24748	0.00116432	0.0212755	SPATA25	128497
ENSG00000158246	1053	-0.759092	0.231131	-3.28425	0.00102256	0.0194858	TENT5B	115572
ENSG00000006016	1355.74	-0.761513	0.239828	-3.17525	0.00149709	0.0248473	CRLF1	9244
ENSG00000181754	1341.04	-0.76382	0.263627	-2.89735	0.00376332	0.0428006	AMIGO1	57463
ENSG00000169884	1061.58	-0.76409	0.260457	-2.93365	0.00334999	0.0401215	WNT10B	7480
ENSG00000182578	474.767	-0.766286	0.174011	-4.40367	1.06e-05	0.000976519	CSF1R	1436
ENSG00000235204	879.058	-0.766743	0.211849	-3.61929	0.000295412	0.00917351	LOC613206	613206
ENSG00000148468	261.844	-0.767443	0.247221	-3.10428	0.00190742	0.0291501	FAM171A1	221061
ENSG00000171368	4658.27	-0.767593	0.224962	-3.4121	0.000644641	0.0147016	TPPP	11076
ENSG00000112759	3709.14	-0.772696	0.189729	-4.07263	4.65e-05	0.00273624	SLC29A1	2030
ENSG00000197905	1823.59	-0.77288	0.258633	-2.98832	0.00280514	0.0363132	TEAD4	7004
ENSG00000144810	6353.69	-0.774094	0.26216	-2.95275	0.00314954	0.0386007	COL8A1	1295
ENSG00000050555	1630.27	-0.781442	0.20114	-3.88508	0.000102298	0.00461218	LAMC3	10319
ENSG00000169635	515.459	-0.781624	0.271903	-2.87464	0.00404493	0.0444552	HIC2	23119
ENSG00000264462	80009.9	-0.787569	0.150695	-5.22625	1.73e-07	4.28e-05	MIR3648-2	103504731
ENSG00000135362	1261.95	-0.789678	0.265499	-2.97432	0.00293639	0.0370661	PRR5L	79899
ENSG00000180979	178.29	-0.792834	0.261291	-3.03429	0.00241103	0.033616	LRRC57	255252
ENSG00000285942	178.29	-0.792834	0.261291	-3.03429	0.00241103	0.033616	LRRC57	255252
ENSG00000197696	139.583	-0.794508	0.178589	-4.44881	8.63e-06	0.000836089	NMB	4828
ENSG00000137959	824.546	-0.79528	0.216929	-3.66608	0.000246292	0.00825378	IFI44L	10964
ENSG00000137965	824.546	-0.79528	0.216929	-3.66608	0.000246292	0.00825378	IFI44	10561
ENSG00000126814	1047.49	-0.796971	0.26892	-2.9636	0.00304059	0.0376675	TRMT5	57570
ENSG00000147604	13993.8	-0.797159	0.25259	-3.15594	0.00159982	0.0258333	RPL7	6129
ENSG00000276700	2.97063e+06	-0.803347	0.130203	-6.16994	6.83e-10	5.12e-07	RNA5-8SN4	109864274
ENSG00000267191	142.849	-0.804534	0.238022	-3.38009	0.000724621	0.0157473	ZNF45-AS1	118827818
ENSG00000245149	865.425	-0.806462	0.2702	-2.98469	0.00283867	0.0365489	RNF139-DT	101927612
ENSG00000149609	391.425	-0.808844	0.249508	-3.24176	0.00118794	0.0214828	C20orf144	128864
ENSG00000263843	851.393	-0.809397	0.236336	-3.42477	0.000615321	0.0142256	MIF4GD-DT	100287042
ENSG00000096717	1690.67	-0.815703	0.228755	-3.56584	0.000362686	0.0102442	SIRT1	23411
ENSG00000135823	11632.5	-0.816294	0.289422	-2.82043	0.004796	0.0490249	STX6	10228
ENSG00000232586	11632.5	-0.816294	0.289422	-2.82043	0.004796	0.0490249	KIAA1614-AS1	103344928
ENSG00000275708	108814	-0.816839	0.12162	-6.71632	1.86e-11	2.39e-08	MIR3648-1	100500862
ENSG00000105819	479.459	-0.818208	0.140329	-5.83066	5.52e-09	2.84e-06	PMPCB	9512
ENSG00000161057	479.459	-0.818208	0.140329	-5.83066	5.52e-09	2.84e-06	PSMC2	5701
ENSG00000264745	95.2011	-0.82155	0.242019	-3.39457	0.00068737	0.0152144	TTC39C-AS1	102724246
ENSG00000112186	7904.63	-0.83475	0.218449	-3.82126	0.000132772	0.00542669	CAP2	10486
ENSG00000103044	235.193	-0.835499	0.275177	-3.03622	0.00239564	0.0334548	HAS3	3038
ENSG00000037757	1445.73	-0.835994	0.193849	-4.3126	1.61e-05	0.00132306	MRI1	84245
ENSG00000104979	1445.73	-0.835994	0.193849	-4.3126	1.61e-05	0.00132306	C19orf53	28974
ENSG00000114737	131.487	-0.837506	0.225764	-3.70965	0.000207545	0.00749681	CISH	1154
ENSG00000111452	526.754	-0.839771	0.237443	-3.53672	0.000405123	0.0109932	ADGRD1	283383
ENSG00000250746	603.051	-0.841331	0.125252	-6.71711	1.85e-11	2.39e-08	LOC100288073	100288073
ENSG00000095303	10742	-0.841959	0.294739	-2.85663	0.0042817	0.0459495	PTGS1	5742
ENSG00000183605	966.573	-0.848299	0.265935	-3.18988	0.00142333	0.0241579	SFXN4	119559
ENSG00000128652	154.145	-0.850026	0.229378	-3.70579	0.000210732	0.00755412	HOXD3	3232
ENSG00000143740	5246.98	-0.851311	0.284838	-2.98876	0.00280114	0.0363132	SNAP47	116841
ENSG00000135902	378.998	-0.854625	0.150301	-5.68609	1.3e-08	5.5e-06	CHRND	1144
ENSG00000128011	1081.68	-0.85617	0.26088	-3.28185	0.00103128	0.0196093	LRFN1	57622
ENSG00000172215	303.492	-0.858741	0.278209	-3.08667	0.00202411	0.030212	CXCR6	10663
ENSG00000115414	28106.3	-0.859516	0.291419	-2.94942	0.00318372	0.0388381	FN1	2335
ENSG00000196814	197.755	-0.862825	0.283754	-3.04076	0.00235985	0.0332202	MVB12B	89853
ENSG00000260101	78.8879	-0.864666	0.278875	-3.10055	0.00193164	0.0293833	AFTPH-DT	101927402
ENSG00000216031	2446.73	-0.864944	0.261827	-3.3035	0.000954854	0.0186047	MIR298	100126296
ENSG00000235590	2446.73	-0.864944	0.261827	-3.3035	0.000954854	0.0186047	GNAS-AS1	149775
ENSG00000284040	2446.73	-0.864944	0.261827	-3.3035	0.000954854	0.0186047	MIR296	407022
ENSG00000167074	1258.58	-0.868689	0.304349	-2.85426	0.00431377	0.045951	TEF	7008
ENSG00000121406	234.888	-0.870311	0.28841	-3.01762	0.00254767	0.0347831	ZNF549	256051
ENSG00000115318	828.445	-0.870774	0.237838	-3.66121	0.000251029	0.00835084	LOXL3	84695
ENSG00000249715	89.4716	-0.880459	0.296736	-2.96715	0.00300578	0.0374396	FER1L5	90342
ENSG00000227495	100.035	-0.883418	0.311378	-2.83712	0.00455219	0.0475137	KIF1C-AS1	102724009
ENSG00000130382	10495	-0.883474	0.221914	-3.98115	6.86e-05	0.00358493	MLLT1	4298
ENSG00000243224	119.384	-0.884274	0.307836	-2.87255	0.00407178	0.0446834	TWF2-DT	101929054
ENSG00000236499	1184.91	-0.885336	0.238832	-3.70694	0.000209778	0.00753021	LINC00896	150197
ENSG00000134962	331.367	-0.885632	0.275941	-3.2095	0.00132967	0.0231523	KLB	152831
ENSG00000228784	165.385	-0.885839	0.272413	-3.25182	0.00114668	0.0211003	LINC00954	400946
ENSG00000069020	1417.43	-0.886511	0.312875	-2.83344	0.00460503	0.0478457	MAST4	375449
ENSG00000145284	326.844	-0.890804	0.282237	-3.15623	0.00159822	0.0258309	SCD5	79966
ENSG00000108839	364.135	-0.895715	0.227931	-3.92976	8.5e-05	0.00412703	ALOX12	239
ENSG00000140832	256.76	-0.900401	0.293796	-3.06471	0.00217878	0.0315841	MARVELD3	91862
ENSG00000198517	2025.57	-0.90409	0.248313	-3.64094	0.000271648	0.00877839	MAFK	7975
ENSG00000166407	115.469	-0.90448	0.274869	-3.29058	0.000999795	0.0191494	LMO1	4004
ENSG00000244515	88.165	-0.905962	0.237756	-3.81047	0.000138705	0.00560806	KRT18P34	391589
ENSG00000004776	224.737	-0.906278	0.245204	-3.69602	0.000219005	0.00768584	HSPB6	126393
ENSG00000057757	1797.96	-0.906373	0.203107	-4.46255	8.1e-06	0.000833404	PITHD1	57095
ENSG00000227473	233.9	-0.909075	0.187779	-4.84121	1.29e-06	0.000218473	TSSK5P	648630
ENSG00000150510	875.494	-0.911038	0.321211	-2.83626	0.00456453	0.0475218	FAM124A	220108
ENSG00000143217	55.9373	-0.916365	0.269759	-3.39698	0.000681338	0.0152006	NECTIN4	81607
ENSG00000050820	922.492	-0.920852	0.225527	-4.08311	4.44e-05	0.00268669	BCAR1	9564
ENSG00000152377	13765.2	-0.921923	0.188734	-4.88478	1.04e-06	0.000181137	SPOCK1	6695
ENSG00000270006	87.7475	-0.92296	0.321658	-2.86938	0.00411274	0.0449343	C16orf95-DT	101928659
ENSG00000245848	233.127	-0.923775	0.22198	-4.16152	3.16e-05	0.00207528	CEBPA	1050
ENSG00000022840	1094.82	-0.926085	0.156415	-5.9207	3.21e-09	1.91e-06	RNF10	9921
ENSG00000102879	111.981	-0.927837	0.259366	-3.57732	0.000347129	0.00996571	CORO1A	11151
ENSG00000178951	1137.68	-0.930518	0.250239	-3.71852	0.000200395	0.00734629	ZBTB7A	51341
ENSG00000105426	1571.93	-0.93214	0.2829	-3.29495	0.000984396	0.0189235	PTPRS	5802
ENSG00000236423	296.704	-0.933726	0.306006	-3.05133	0.0022783	0.032579	LINC01134	100133612
ENSG00000186765	1377.35	-0.935544	0.187845	-4.98041	6.35e-07	0.000120348	FSCN2	25794
ENSG00000141424	124.005	-0.946775	0.216346	-4.37621	1.21e-05	0.00106532	SLC39A6	25800
ENSG00000173250	94.7977	-0.948785	0.322398	-2.9429	0.0032515	0.0393554	GPR151	134391
ENSG00000070404	10706.1	-0.948971	0.323032	-2.9377	0.00330656	0.0398451	FSTL3	10272
ENSG00000234616	4577.5	-0.950912	0.252593	-3.7646	0.000166816	0.00645124	JRK	8629
ENSG00000236081	3449.14	-0.953066	0.286305	-3.32885	0.00087206	0.0176301	ELFN1-AS1	101927125
ENSG00000171517	88.3828	-0.954808	0.330706	-2.88718	0.00388706	0.0433843	LPAR3	23566
ENSG00000264028	302.159	-0.956587	0.31728	-3.01496	0.00257017	0.0348745	RN7SL744P	106479493
ENSG00000235299	64.2261	-0.957672	0.280677	-3.412	0.000644877	0.0147016	MRPL53P1	359752
ENSG00000243910	100.981	-0.961782	0.335192	-2.86934	0.00411326	0.0449343	TUBA4B	80086
ENSG00000214359	59.935	-0.962278	0.306454	-3.14004	0.00168923	0.0268151	RPL18P10	100271286
ENSG00000133111	1623.32	-0.964898	0.308938	-3.12328	0.0017885	0.0279346	RFXAP	5994
ENSG00000102890	380.527	-0.965156	0.192986	-5.00117	5.7e-07	0.000109947	ELMO3	79767
ENSG00000202198	186.499	-0.966056	0.281739	-3.42891	0.000606017	0.0140418	RN7SK	125050
ENSG00000283293	186.499	-0.966056	0.281739	-3.42891	0.000606017	0.0140418	RN7SK	125050
ENSG00000127507	843.776	-0.970091	0.265547	-3.65319	0.000259005	0.00852316	ADGRE2	30817
ENSG00000259230	226.23	-0.980227	0.167702	-5.84505	5.06e-09	2.83e-06	LINC02323	105370681
ENSG00000196366	348.192	-0.980456	0.192181	-5.10174	3.37e-07	7.18e-05	C9orf163	158055
ENSG00000227964	1157.95	-0.980892	0.203985	-4.80865	1.52e-06	0.000249204	LINC01429	101927678
ENSG00000091947	862.277	-0.98504	0.323632	-3.0437	0.00233686	0.0330561	TMEM101	84336
ENSG00000166106	1494.63	-0.988516	0.277072	-3.56772	0.000360098	0.0101931	ADAMTS15	170689
ENSG00000281832	156.518	-0.989834	0.266814	-3.70983	0.000207402	0.00749681	LINC00602	441177
ENSG00000223923	262.582	-0.990158	0.330116	-2.99942	0.00270491	0.0356309	TNS1-AS1	105373878
ENSG00000110697	2326.14	-0.994776	0.299388	-3.3227	0.000891494	0.0178981	PITPNM1	9600
ENSG00000204946	533.203	-0.994885	0.221689	-4.48775	7.2e-06	0.000750666	ZNF783	100289678
ENSG00000244560	533.203	-0.994885	0.221689	-4.48775	7.2e-06	0.000750666	LOC155060	155060
ENSG00000223764	684.214	-1.0026	0.221152	-4.53353	5.8e-06	0.000682547	LINC02593	100130417
ENSG00000248791	65.0852	-1.00556	0.279494	-3.59777	0.000320955	0.00950548	LOC100422687	100422687
ENSG00000288649	249.485	-1.00772	0.292039	-3.45062	0.000559291	0.0133903	ACTL10	170487
ENSG00000135297	3065.54	-1.00924	0.340593	-2.96319	0.00304469	0.0376675	MTO1	25821
ENSG00000243819	69.3574	-1.00927	0.278322	-3.62626	0.000287557	0.00905823	RN7SL832P	106479524
ENSG00000250722	48.4429	-1.01076	0.3587	-2.81784	0.00483477	0.0492873	SELENOP	6414
ENSG00000102003	143.251	-1.01657	0.309615	-3.28334	0.00102585	0.0195342	SYP	6855
ENSG00000265683	121.609	-1.02319	0.264583	-3.86719	0.000110098	0.0048262	SYPL1P2	100132972
ENSG00000171116	50.5166	-1.0285	0.282245	-3.64399	0.000268441	0.00870692	HSFX1	100506164
ENSG00000159251	1880.48	-1.03522	0.288709	-3.5857	0.00033617	0.00981213	ACTC1	70
ENSG00000162385	788.937	-1.03857	0.254992	-4.07293	4.64e-05	0.00273624	MAGOH	4116
ENSG00000099769	166.387	-1.04283	0.284578	-3.6645	0.000247825	0.00828397	IGFALS	3483
ENSG00000162032	166.387	-1.04283	0.284578	-3.6645	0.000247825	0.00828397	SPSB3	90864
ENSG00000205740	330.957	-1.04568	0.273793	-3.81924	0.000133863	0.00544585	LOC107984285	107984285
ENSG00000234093	84.2617	-1.04688	0.273262	-3.83105	0.000127596	0.00532216	RPS15AP11	644790
ENSG00000245748	122.73	-1.04846	0.351828	-2.98005	0.00288203	0.0366753	LOC100129931	100129931
ENSG00000187634	1838.16	-1.04876	0.226418	-4.63197	3.62e-06	0.0004776	SAMD11	148398
ENSG00000106771	3202.07	-1.05493	0.288406	-3.65778	0.000254408	0.00840171	TMEM245	23731
ENSG00000119326	3202.07	-1.05493	0.288406	-3.65778	0.000254408	0.00840171	CTNNAL1	8727
ENSG00000165716	256.04	-1.05701	0.236233	-4.47444	7.66e-06	0.00079147	DIPK1B	138311
ENSG00000242251	32.0698	-1.06321	0.365346	-2.91013	0.00361273	0.0418099	RN7SL20P	106479232
ENSG00000184507	42.9028	-1.0635	0.363543	-2.92538	0.00344041	0.0408503	NUTM1	256646
ENSG00000169083	259.326	-1.06484	0.334627	-3.18216	0.00146182	0.0245414	AR	367
ENSG00000182325	74.8522	-1.06765	0.28881	-3.69673	0.000218393	0.00768584	FBXL6	26233
ENSG00000261587	74.8522	-1.06765	0.28881	-3.69673	0.000218393	0.00768584	TMEM249	340393
ENSG00000261678	42.384	-1.06779	0.359836	-2.96744	0.00300287	0.0374396	SCRT1	83482
ENSG00000275558	59.7209	-1.07162	0.368378	-2.90902	0.00362561	0.0418229	RN7SKP175	106479173
ENSG00000260927	67.3397	-1.07247	0.321683	-3.33393	0.000856285	0.0174992	LOC101927556	101927556
ENSG00000054179	122.424	-1.07609	0.259374	-4.1488	3.34e-05	0.00216011	ENTPD2	954
ENSG00000153162	11819.5	-1.07782	0.350115	-3.07846	0.00208072	0.0307624	BMP6	654
ENSG00000106070	1119.68	-1.0797	0.338742	-3.18737	0.00143573	0.0242586	GRB10	2887
ENSG00000276255	2017.41	-1.08089	0.280987	-3.84678	0.000119681	0.00509299	LINC02809	100506571
ENSG00000079101	118.134	-1.08425	0.34437	-3.1485	0.0016411	0.0262897	CLUL1	27098
ENSG00000146731	152.879	-1.10113	0.361105	-3.04935	0.00229341	0.032668	CCT6A	908
ENSG00000206603	152.879	-1.10113	0.361105	-3.04935	0.00229341	0.032668	SNORA22B	109616964
ENSG00000207168	152.879	-1.10113	0.361105	-3.04935	0.00229341	0.032668	SNORA15	677803
ENSG00000232037	55.8813	-1.10423	0.297054	-3.71727	0.000201388	0.0073702	RPL21P29	440575
ENSG00000162819	2098.15	-1.10874	0.391608	-2.83125	0.00463661	0.0480508	BROX	148362
ENSG00000119508	2331.36	-1.11199	0.318923	-3.4867	0.00048902	0.0123196	NR4A3	8013
ENSG00000244748	30.035	-1.11936	0.352458	-3.17587	0.0014939	0.0248259	RN7SL153P	106480490
ENSG00000163467	236.292	-1.12378	0.324447	-3.46367	0.000532857	0.0129825	TSACC	128229
ENSG00000188917	1148.12	-1.13173	0.218111	-5.18878	2.12e-07	5.05e-05	TRMT2B	79979
ENSG00000142208	2427.14	-1.13385	0.396331	-2.86088	0.00422474	0.045577	AKT1	207
ENSG00000213970	175.354	-1.13392	0.368646	-3.07591	0.00209861	0.0308325	RPS15P7	100271361
ENSG00000124203	8419.74	-1.13586	0.324168	-3.50392	0.000458465	0.011864	ZNF831	128611
ENSG00000170166	128.833	-1.13716	0.346054	-3.28607	0.00101594	0.01939	HOXD4	3233
ENSG00000101082	119.968	-1.13862	0.401804	-2.83376	0.00460037	0.0478264	SLA2	84174
ENSG00000234319	26.1712	-1.14288	0.37518	-3.04622	0.00231739	0.032905	RPS12P2	619448
ENSG00000240549	129.996	-1.14416	0.298373	-3.83466	0.000125737	0.00525371	THOC7-AS1	100874039
ENSG00000280278	30.4409	-1.1484	0.369667	-3.10657	0.00189271	0.0289928	FLJ30679	146512
ENSG00000154721	106.097	-1.15651	0.331632	-3.48733	0.000487876	0.0123095	JAM2	58494
ENSG00000109452	119.162	-1.15737	0.406287	-2.84864	0.00439064	0.0464408	INPP4B	8821
ENSG00000182376	356.569	-1.16281	0.292599	-3.97408	7.07e-05	0.00365654	LOC339059	339059
ENSG00000137266	1032.38	-1.17495	0.263884	-4.45253	8.49e-06	0.000835744	SLC22A23	63027
ENSG00000173482	4916.12	-1.1782	0.23483	-5.01723	5.24e-07	0.000102655	PTPRM	5797
ENSG00000149115	7244.43	-1.17835	0.415395	-2.8367	0.00455825	0.0475218	TNKS1BP1	85456
ENSG00000280424	308.742	-1.18374	0.340634	-3.47512	0.000510624	0.0127123	LOC730668	730668
ENSG00000065320	689.386	-1.18907	0.394291	-3.01572	0.00256373	0.0348561	NTN1	9423
ENSG00000227759	823.331	-1.19327	0.41854	-2.85102	0.00435792	0.0462775	VTI1BP4	100422540
ENSG00000126231	128.062	-1.19442	0.388899	-3.07128	0.00213143	0.0310371	PROZ	8858
ENSG00000141959	267.391	-1.19683	0.402166	-2.97595	0.00292081	0.0369894	PFKL	5211
ENSG00000256746	50.6378	-1.19701	0.367745	-3.25499	0.00113396	0.0210135	MADD-AS1	101928943
ENSG00000130810	24.6763	-1.19762	0.409819	-2.92231	0.0034745	0.0408838	PPAN	56342
ENSG00000209645	24.6763	-1.19762	0.409819	-2.92231	0.0034745	0.0408838	SNORD105	692229
ENSG00000238531	24.6763	-1.19762	0.409819	-2.92231	0.0034745	0.0408838	SNORD105B	100113382
ENSG00000243207	24.6763	-1.19762	0.409819	-2.92231	0.0034745	0.0408838	PPAN-P2RY11	692312
ENSG00000244165	24.6763	-1.19762	0.409819	-2.92231	0.0034745	0.0408838	P2RY11	5032
ENSG00000076716	706.462	-1.2029	0.402268	-2.9903	0.00278702	0.0361679	GPC4	2239
ENSG00000175097	35.3604	-1.20851	0.332463	-3.63503	0.000277947	0.00891477	RAG2	5897
ENSG00000260778	123.036	-1.20983	0.416445	-2.90514	0.00367094	0.0420014	MIR3677HG	106660606
ENSG00000284346	123.036	-1.20983	0.416445	-2.90514	0.00367094	0.0420014	MIR940	100126328
ENSG00000165271	35.9031	-1.21491	0.358352	-3.39026	0.000698274	0.0153714	NOL6	65083
ENSG00000275651	35.9031	-1.21491	0.358352	-3.39026	0.000698274	0.0153714	MIR6851	102465512
ENSG00000018699	1659.72	-1.21544	0.399096	-3.04549	0.00232299	0.0329665	TTC27	55622
ENSG00000068650	13940.1	-1.21674	0.355509	-3.42252	0.000620431	0.0143152	ATP11A	23250
ENSG00000235138	293.299	-1.22351	0.224639	-5.44656	5.14e-08	1.48e-05	LOC100130548	100130548
ENSG00000142207	5498.04	-1.22652	0.277189	-4.42485	9.65e-06	0.000901212	URB1	9875
ENSG00000159055	5498.04	-1.22652	0.277189	-4.42485	9.65e-06	0.000901212	MIS18A	54069
ENSG00000200792	5498.04	-1.22652	0.277189	-4.42485	9.65e-06	0.000901212	SNORA80A	677846
ENSG00000186019	253.797	-1.23207	0.251533	-4.89824	9.67e-07	0.000170297	LOC100379224	100379224
ENSG00000100146	83.2699	-1.2325	0.262422	-4.69662	2.65e-06	0.000379335	SOX10	6663
ENSG00000149782	4431.32	-1.23306	0.363258	-3.39445	0.000687662	0.0152144	PLCB3	5331
ENSG00000250635	52.5507	-1.23741	0.421531	-2.9355	0.00333007	0.0400463	CXXC5-AS1	111082989
ENSG00000259895	279.07	-1.24382	0.404065	-3.07826	0.0020821	0.0307624	TEDC2-AS1	729652
ENSG00000182831	12948.6	-1.2486	0.28416	-4.394	1.11e-05	0.00101135	C16orf72	29035
ENSG00000259125	39.0899	-1.25184	0.365967	-3.42064	0.000624737	0.0143799	LRP1-AS	105751187
ENSG00000283463	24.5152	-1.26103	0.367512	-3.43126	0.000600782	0.013988	HSFX4	101927685
ENSG00000115211	2041.4	-1.26358	0.385927	-3.27415	0.00105982	0.0200213	EIF2B4	8890
ENSG00000142149	635.346	-1.26523	0.391219	-3.23408	0.00122036	0.021888	HUNK	30811
ENSG00000263412	286.56	-1.26822	0.385729	-3.28786	0.00100952	0.0193166	NFE2L1-DT	116435298
ENSG00000184363	1969.76	-1.27123	0.349081	-3.64165	0.000270893	0.00877559	PKP3	11187
ENSG00000254019	29.296	-1.28119	0.370256	-3.46028	0.00053961	0.0130863	LOC105375787	105375787
ENSG00000177350	23.1443	-1.28249	0.407755	-3.14524	0.0016595	0.0264231	RPL13AP3	645683
ENSG00000118046	2741.24	-1.28546	0.373453	-3.4421	0.000577227	0.0136713	STK11	6794
ENSG00000150893	103.403	-1.28643	0.435838	-2.95162	0.00316109	0.038706	FREM2	341640
ENSG00000182759	118.457	-1.29413	0.408557	-3.16755	0.00153727	0.0251548	MAFA	389692
ENSG00000162526	59.4421	-1.2961	0.414569	-3.12637	0.00176976	0.0277411	TSSK3	81629
ENSG00000122986	26.7236	-1.30017	0.442023	-2.9414	0.00326734	0.039491	HVCN1	84329
ENSG00000106546	6199.06	-1.30202	0.42466	-3.06604	0.00216915	0.0314815	AHR	196
ENSG00000165030	6903.81	-1.30219	0.36191	-3.5981	0.000320554	0.00950434	NFIL3	4783
ENSG00000169071	6903.81	-1.30219	0.36191	-3.5981	0.000320554	0.00950434	ROR2	4920
ENSG00000228149	21.3696	-1.30644	0.426879	-3.06044	0.0022101	0.0318994	RPL3P1	8488
ENSG00000268738	39.4261	-1.31469	0.307902	-4.26983	1.96e-05	0.00148789	HSFX2	100130086
ENSG00000140986	28.6878	-1.31573	0.449907	-2.92444	0.00345078	0.0408838	RPL3L	6123
ENSG00000174917	1034.47	-1.31653	0.3185	-4.13354	3.57e-05	0.00228461	MICOS13	125988
ENSG00000178460	126.777	-1.33042	0.425809	-3.12445	0.00178139	0.0278734	MCMDC2	157777
ENSG00000176749	462.192	-1.33328	0.294549	-4.52651	6e-06	0.000699333	CDK5R1	8851
ENSG00000187553	45.1288	-1.3446	0.441349	-3.04657	0.00231469	0.0328844	CYP26C1	340665
ENSG00000260228	36.2038	-1.34756	0.405184	-3.32581	0.00088163	0.0177408	LOC102724163	102724163
ENSG00000127129	69.3378	-1.35264	0.396141	-3.41454	0.000638906	0.0146036	EDN2	1907
ENSG00000148773	9398.84	-1.35778	0.359631	-3.77548	0.0001597	0.00621742	MKI67	4288
ENSG00000125844	13123.3	-1.3619	0.453396	-3.00377	0.00266653	0.0355357	RRBP1	6238
ENSG00000234327	345.563	-1.38044	0.332628	-4.15009	3.32e-05	0.00215864	ZNF232-AS1	101928000
ENSG00000167588	102.006	-1.38499	0.22251	-6.22439	4.83e-10	4.23e-07	GPD1	2819
ENSG00000188659	75.3951	-1.39241	0.461472	-3.01733	0.00255016	0.0347831	SAXO2	283726
ENSG00000099785	290.517	-1.40286	0.423271	-3.31433	0.000918628	0.0182474	MARCHF2	51257
ENSG00000258471	31.0885	-1.41904	0.396233	-3.58132	0.000341867	0.00983617	LOC101929718	101929718
ENSG00000197182	153.561	-1.42736	0.494129	-2.88864	0.00386908	0.0433609	MIRLET7BHG	400931
ENSG00000266533	153.561	-1.42736	0.494129	-2.88864	0.00386908	0.0433609	MIR3619	100500828
ENSG00000283990	153.561	-1.42736	0.494129	-2.88864	0.00386908	0.0433609	MIRLET7A3	406883
ENSG00000284175	153.561	-1.42736	0.494129	-2.88864	0.00386908	0.0433609	MIR4763	100616143
ENSG00000284520	153.561	-1.42736	0.494129	-2.88864	0.00386908	0.0433609	MIRLET7B	406884
ENSG00000173465	535.17	-1.43065	0.429229	-3.33308	0.000858915	0.0175054	ZNRD2	10534
ENSG00000176973	535.17	-1.43065	0.429229	-3.33308	0.000858915	0.0175054	FAM89B	23625
ENSG00000179314	340.541	-1.43336	0.506823	-2.82812	0.0046822	0.0483324	WSCD1	23302
ENSG00000006611	794.845	-1.44111	0.364705	-3.95142	7.77e-05	0.00386569	USH1C	10083
ENSG00000151655	20.027	-1.45427	0.480703	-3.02531	0.0024838	0.03429	ITIH2	3698
ENSG00000049323	1456.44	-1.4594	0.429819	-3.39539	0.000685303	0.0152006	LTBP1	4052
ENSG00000134516	44.314	-1.46405	0.42534	-3.44207	0.000577281	0.0136713	DOCK2	1794
ENSG00000171798	61.9004	-1.47452	0.388654	-3.79391	0.000148292	0.00593169	KNDC1	85442
ENSG00000179157	26.313	-1.47657	0.399097	-3.69978	0.000215783	0.0076619	RPS2P28	100132673
ENSG00000132854	366.09	-1.47878	0.479988	-3.08086	0.00206403	0.0306682	KANK4	163782
ENSG00000162878	1713.66	-1.48263	0.320242	-4.62972	3.66e-06	0.000480405	PKDCC	91461
ENSG00000102897	986.256	-1.48713	0.292876	-5.07769	3.82e-07	7.96e-05	LYRM1	57149
ENSG00000114742	1128.19	-1.51208	0.291694	-5.18378	2.17e-07	5.09e-05	WDR48	57599
ENSG00000167967	150.4	-1.52763	0.26393	-5.78803	7.12e-09	3.34e-06	E4F1	1877
ENSG00000167968	150.4	-1.52763	0.26393	-5.78803	7.12e-09	3.34e-06	DNASE1L2	1775
ENSG00000260458	219.063	-1.53187	0.51447	-2.97757	0.00290547	0.0368842	KCNJ18	100134444
ENSG00000237412	10024.7	-1.53578	0.499566	-3.07423	0.00211048	0.0309208	PRSS56	646960
ENSG00000249087	160.89	-1.55311	0.474426	-3.27366	0.00106163	0.0200268	ZNF436-AS1	148898
ENSG00000261308	83.3917	-1.57368	0.442725	-3.55454	0.000378643	0.0104999	FIGNL2	401720
ENSG00000185261	1148.07	-1.57522	0.523761	-3.00752	0.00263385	0.0353877	KIAA0825	285600
ENSG00000137809	223.698	-1.57819	0.518818	-3.04189	0.00235095	0.0331471	ITGA11	22801
ENSG00000179348	3158.16	-1.58105	0.374293	-4.2241	2.4e-05	0.00171995	GATA2	2624
ENSG00000261798	46.8679	-1.59454	0.529992	-3.0086	0.00262452	0.0353059	LOC101929536	101929536
ENSG00000168060	49.7861	-1.71485	0.578859	-2.96247	0.00305177	0.0377373	NAALADL1	10004
ENSG00000186594	618.342	-1.71509	0.59288	-2.89281	0.00381808	0.043128	MIR22HG	84981
ENSG00000283824	618.342	-1.71509	0.59288	-2.89281	0.00381808	0.043128	MIR22	407004
ENSG00000150594	59.0777	-1.73472	0.611213	-2.83816	0.0045374	0.0474726	ADRA2A	150
ENSG00000240087	776.17	-1.75651	0.593115	-2.96149	0.00306153	0.0378223	RPSAP12	387867
ENSG00000115084	3295.35	-1.76125	0.588784	-2.99134	0.00277753	0.0361269	SLC35F5	80255
ENSG00000112290	449.032	-1.77034	0.543487	-3.25737	0.0011245	0.0208825	WASF1	8936
ENSG00000213385	32.4996	-1.7955	0.635182	-2.82675	0.00470227	0.0484442	RPL7AP39	646476
ENSG00000222011	32.4996	-1.7955	0.635182	-2.82675	0.00470227	0.0484442	FAM185A	222234
ENSG00000204177	890.541	-1.82037	0.59564	-3.05616	0.00224192	0.032164	BMS1P1	399761
ENSG00000168067	491.858	-1.95443	0.544385	-3.59016	0.000330474	0.00968899	MAP4K2	5871
ENSG00000177666	54.4849	-2.02318	0.48219	-4.19581	2.72e-05	0.00186286	PNPLA2	57104
ENSG00000177685	54.4849	-2.02318	0.48219	-4.19581	2.72e-05	0.00186286	CRACR2B	283229
ENSG00000130635	557.504	-2.02974	0.419103	-4.84307	1.28e-06	0.000217843	COL5A1	1289
ENSG00000101825	44.885	-2.03039	0.597908	-3.39582	0.000684243	0.0152006	MXRA5	25878
ENSG00000131080	28.5965	-2.05089	0.714592	-2.87001	0.00410458	0.044921	EDA2R	60401
ENSG00000022567	1134.65	-2.05144	0.607389	-3.37748	0.000731539	0.0158379	SLC45A4	57210
ENSG00000086504	918.349	-2.09943	0.649987	-3.22996	0.00123806	0.0219826	MRPL28	10573
ENSG00000129925	918.349	-2.09943	0.649987	-3.22996	0.00123806	0.0219826	PGAP6	58986
ENSG00000226496	160.086	-2.21069	0.689365	-3.20685	0.00134196	0.0233286	LINC00323	284835
ENSG00000280109	160.086	-2.21069	0.689365	-3.20685	0.00134196	0.0233286	PLAC4	191585
ENSG00000113240	37.5797	-2.47375	0.445489	-5.55289	2.81e-08	9.33e-06	CLK4	57396
ENSG00000252464	37.5797	-2.47375	0.445489	-5.55289	2.81e-08	9.33e-06	RN7SKP70	107057644
ENSG00000181827	575.958	-2.95675	0.655338	-4.51179	6.43e-06	0.000726465	RFX7	64864
ENSG00000178921	5240.3	-2.99623	0.822867	-3.64121	0.000271364	0.00877839	PFAS	5198
ENSG00000188070	423.617	-3.68359	1.16961	-3.14941	0.00163598	0.0262558	ZFTA	65998
ENSG00000135535	8744.71	-3.75114	0.948506	-3.95478	7.66e-05	0.00385073	CD164	8763
ENSG00000089248	518.4	-3.86856	1.17667	-3.28773	0.00101	0.0193166	ERP29	10961
ENSG00000278845	604.992	-12.621	3.09947	-4.072	4.66e-05	0.00273624	MRPL45	84311
ENSG00000115274	289.445	-25.8405	3.3835	-7.63722	2.22e-14	5.82e-11	INO80B	83444
ENSG00000239779	289.445	-25.8405	3.3835	-7.63722	2.22e-14	5.82e-11	WBP1	23559
ENSG00000274049	289.445	-25.8405	3.3835	-7.63722	2.22e-14	5.82e-11	INO80B-WBP1	100532735
ENSG00000113273	527.923	-26.6034	3.38344	-7.86284	3.76e-15	1.64e-11	ARSB	411
