# Supplementary material for: PPARγ mediated enhanced lipid biogenesis fuels Mycobacterium tuberculosis growth in a drug-tolerant hepatocyte environment
Source: eLife. 2025 Dec 8;14:RP103817. doi: 10.7554/eLife.103817 (PMC12685304; doi:10.7554/eLife.103817)
Supplement: Figure 4—source data 2. [file elife-103817-fig4-data2.xlsx]

## Sheet: Figure 4-Source data 2
Differentially expressed genes at 48 hours post infection-Figure 4E
Ensembl Gene ID	Base Mean	log2FoldChange	lfcSE	stat	pvalue	padj	symbol	ENTREZID
ENSG00000169895	868.819	26.8885	3.38342	7.94715	1.91e-15	3.01e-14	SYAP1	94056
ENSG00000138767	2126.57	14.643	1.09845	13.3306	1.54e-40	9.59e-39	CNOT6L	246175
ENSG00000135899	1666.93	12.2725	0.864097	14.2027	8.82e-46	6.87e-44	SP110	3431
ENSG00000089248	1072.13	11.5814	1.77425	6.52748	6.69e-11	6.86e-10	ERP29	10961
ENSG00000123610	208.556	11.2928	1.03314	10.9305	8.24e-28	2.88e-26	TNFAIP6	7130
ENSG00000124256	202.415	11.2492	1.03327	10.887	1.33e-27	4.57e-26	ZBP1	81030
ENSG00000261040	135.642	10.6725	1.71098	6.23763	4.44e-10	4.14e-09	WFDC21P	645638
ENSG00000101000	340.664	10.5391	1.3132	8.02553	1.01e-15	1.63e-14	PROCR	10544
ENSG00000214872	115.858	10.4455	1.03388	10.1032	5.35e-24	1.48e-22	SMTNL1	219537
ENSG00000225492	88.2085	10.0499	1.04451	9.62159	6.48e-22	1.6e-20	GBP1P1	400759
ENSG00000128422	4759.56	9.69488	3.23231	2.99937	0.00270541	0.00858906	KRT17	3872
ENSG00000197110	55.3161	9.3761	1.05336	8.90117	5.53e-19	1.13e-17	IFNL3	282617
ENSG00000102271	48.6383	9.19244	1.15522	7.95734	1.76e-15	2.77e-14	KLHL4	56062
ENSG00000115009	44.1966	9.05439	1.05082	8.61652	6.9e-18	1.33e-16	CCL20	6364
ENSG00000244122	139.405	8.68247	0.852473	10.185	2.31e-24	6.59e-23	UGT1A7	54577
ENSG00000204021	30.6136	8.52178	1.10319	7.72467	1.12e-14	1.65e-13	LIPK	643414
ENSG00000182333	27.1242	8.35113	1.10451	7.5609	4e-14	5.65e-13	LIPF	8513
ENSG00000169245	1397.67	8.25174	0.764586	10.7924	3.74e-27	1.25e-25	CXCL10	3627
ENSG00000268902	23.2597	8.13007	1.1102	7.32306	2.42e-13	3.2e-12	CSAG2	102723547
ENSG00000157111	23.1518	8.11985	1.15953	7.00269	2.51e-12	3.02e-11	TMEM171	134285
ENSG00000259884	371.32	8.04904	1.52321	5.28426	1.26e-07	8.69e-07	NR4A1AS	115409980
ENSG00000171403	18.0557	7.76566	1.14964	6.75489	1.43e-11	1.59e-10	KRT9	3857
ENSG00000199347	96.8213	7.73411	1.5909	4.86148	1.17e-06	6.96e-06	RNU5E-1	26829
ENSG00000162494	17.5792	7.72309	1.10178	7.00968	2.39e-12	2.88e-11	LRRC38	126755
ENSG00000117228	2506.17	7.68281	0.166751	46.0737	0	0	GBP1	2633
ENSG00000124664	17.0544	7.67656	1.16906	6.56644	5.15e-11	5.37e-10	SPDEF	25803
ENSG00000136244	4363.42	7.57267	0.856208	8.84442	9.2e-19	1.85e-17	IL6	3569
ENSG00000205002	15.7008	7.56177	1.12	6.75156	1.46e-11	1.62e-10	AARD	441376
ENSG00000230040	15.1654	7.51141	1.67705	4.47895	7.5e-06	3.97e-05	LINC00364	100874145
ENSG00000012223	14.6885	7.46648	1.15289	6.47629	9.4e-11	9.48e-10	LTF	4057
ENSG00000253396	14.428	7.44157	1.19416	6.23165	4.62e-10	4.29e-09	LOC105379391	105379391
ENSG00000132274	13754.6	7.42521	0.22601	32.8535	1.01e-236	1.11e-233	TRIM22	10346
ENSG00000181023	13754.6	7.42521	0.22601	32.8535	1.01e-236	1.11e-233	OR56B1	387748
ENSG00000181109	13754.6	7.42521	0.22601	32.8535	1.01e-236	1.11e-233	OR52P1P	81248
ENSG00000140519	13.9954	7.39556	1.20001	6.16294	7.14e-10	6.51e-09	RHCG	51458
ENSG00000128284	700.078	7.34186	0.442707	16.584	9.09e-62	1.17e-59	APOL3	80833
ENSG00000167461	898.92	7.30133	0.795134	9.18251	4.21e-20	9.27e-19	RAB8A	4218
ENSG00000196684	898.92	7.30133	0.795134	9.18251	4.21e-20	9.27e-19	HSH2D	84941
ENSG00000134321	89916.3	7.23931	0.105692	68.4942	0	0	RSAD2	91543
ENSG00000225298	12.2126	7.2029	1.25175	5.75428	8.7e-09	6.97e-08	LINC00113	54088
ENSG00000251669	12.0057	7.1728	1.77862	4.03278	5.51e-05	0.00025166	FAM86EP	348926
ENSG00000168062	872.551	7.07167	0.32984	21.4397	5.7e-102	1.67e-99	BATF2	116071
ENSG00000131203	1599.72	7.03213	0.595604	11.8067	3.6e-32	1.56e-30	IDO1	3620
ENSG00000224048	10.8173	7.02504	1.17199	5.9941	2.05e-09	1.76e-08	LINC02612	101929282
ENSG00000172081	290.864	6.95561	1.86817	3.72321	0.0001967	0.00080712	MOB3A	126308
ENSG00000157368	10.1957	6.9361	1.18455	5.85546	4.76e-09	3.92e-08	IL34	146433
ENSG00000253214	10.0939	6.91874	1.19257	5.80152	6.57e-09	5.33e-08	LOC105375924	105375924
ENSG00000156127	9.8034	6.88183	1.76893	3.89039	0.00010008	0.00043524	BATF	10538
ENSG00000286013	9.5335	6.83862	1.1653	5.86853	4.4e-09	3.64e-08	LOC105375440	105375440
ENSG00000151790	147.888	6.81805	1.50362	4.53442	5.78e-06	3.11e-05	TDO2	6999
ENSG00000124731	9.27064	6.8031	1.25329	5.4282	5.69e-08	4.1e-07	TREM1	54210
ENSG00000229261	9.23764	6.79325	1.14878	5.91344	3.35e-09	2.82e-08	LOC101928994	101928994
ENSG00000130433	170.575	6.79207	1.59098	4.26912	1.96e-05	9.66e-05	CACNG6	59285
ENSG00000154451	553.182	6.76611	0.449386	15.0564	3.14e-51	3e-49	GBP5	115362
ENSG00000134716	8.97261	6.75433	1.27722	5.2883	1.23e-07	8.51e-07	CYP2J2	1573
ENSG00000112559	8.85659	6.73109	1.27938	5.26121	1.43e-07	9.77e-07	MDFI	4188
ENSG00000119812	8.13645	6.61215	2.43461	2.7159	0.00660954	0.0190266	FAM98A	25940
ENSG00000175946	1148.29	6.59265	0.317747	20.7481	1.27e-95	3.2e-93	KLHL38	340359
ENSG00000136514	1252.02	6.54295	0.179419	36.4674	3.64e-291	6.23e-288	RTP4	64108
ENSG00000188282	41.6279	6.50058	0.794734	8.17957	2.85e-16	4.82e-15	RUFY4	285180
ENSG00000106560	71.5783	6.4919	0.596782	10.8782	1.46e-27	5.02e-26	GIMAP2	26157
ENSG00000126266	7.26628	6.4472	1.79408	3.5936	0.00032614	0.00127954	FFAR1	2864
ENSG00000186847	39.8193	6.43343	0.830063	7.75053	9.15e-15	1.36e-13	KRT14	3861
ENSG00000158516	7.18465	6.43156	1.26149	5.09837	3.43e-07	2.21e-06	CPA2	1358
ENSG00000197632	7.11579	6.41992	1.25377	5.12049	3.05e-07	1.99e-06	SERPINB2	5055
ENSG00000271408	7.0967	6.4162	1.29208	4.96581	6.84e-07	4.22e-06	NAPGP1	100288843
ENSG00000144583	7.04847	6.40609	2.41955	2.64763	0.00810571	0.0227889	MARCHF4	57574
ENSG00000260802	7.04575	6.40344	1.24815	5.13034	2.89e-07	1.89e-06	SERTM2	401613
ENSG00000205837	7.01444	6.39349	1.21805	5.24894	1.53e-07	1.04e-06	LINC00487	400941
ENSG00000136689	6.94267	6.38445	1.74357	3.66171	0.00025054	0.00100631	IL1RN	3557
ENSG00000134339	105.971	6.37257	0.530801	12.0056	3.32e-33	1.51e-31	SAA2	6289
ENSG00000112183	6.8871	6.36763	1.24186	5.12748	2.94e-07	1.92e-06	RBM24	221662
ENSG00000183549	6.69693	6.33764	1.35831	4.66582	3.07e-06	1.73e-05	ACSM5	54988
ENSG00000132530	683.328	6.32707	1.34708	4.69689	2.64e-06	1.5e-05	XAF1	54739
ENSG00000122641	561.61	6.31113	0.528707	11.9369	7.6e-33	3.4e-31	INHBA	3624
ENSG00000244474	6.56354	6.30163	1.47092	4.28415	1.83e-05	9.09e-05	UGT1A4	54657
ENSG00000178015	6.43659	6.28011	1.23207	5.09722	3.45e-07	2.23e-06	GPR150	285601
ENSG00000159212	6.44098	6.2762	1.18563	5.29357	1.2e-07	8.28e-07	CLIC6	54102
ENSG00000223656	6.3649	6.26619	1.3627	4.59837	4.26e-06	2.34e-05	HMGB3P10	100129320
ENSG00000224995	6.00541	6.17668	1.81847	3.39664	0.00068219	0.00249645	LINC01526	101928770
ENSG00000178734	5.6566	6.08982	1.7671	3.44623	0.00056847	0.00211647	LMO7DN	729420
ENSG00000162654	555.414	6.08409	0.957968	6.35103	2.14e-10	2.07e-09	GBP4	115361
ENSG00000185467	5.60001	6.0699	1.23414	4.91831	8.73e-07	5.3e-06	KPNA7	402569
ENSG00000239713	23.2549	6.05955	0.975613	6.21102	5.26e-10	4.86e-09	APOBEC3G	60489
ENSG00000254154	65.4757	6.03632	1.42438	4.23786	2.26e-05	0.00010984	SEC16B	89866
ENSG00000171195	5.34587	6.00293	1.30303	4.60689	4.09e-06	2.26e-05	MUC7	4589
ENSG00000204020	120.78	6.00084	0.617655	9.71551	2.59e-22	6.51e-21	LIPN	643418
ENSG00000266976	5.27514	5.98934	1.76816	3.38733	0.00070578	0.00257605	LOC102724908	102724908
ENSG00000183486	8596.54	5.95105	0.142131	41.8702	0	0	MX2	4600
ENSG00000133328	798.3	5.94826	0.562287	10.5787	3.74e-26	1.2e-24	PLAAT2	54979
ENSG00000169248	1495.82	5.92393	0.276545	21.4212	8.47e-102	2.47e-99	CXCL11	6373
ENSG00000164342	929.666	5.89038	0.168136	35.0334	6.97e-269	9.81e-266	TLR3	7098
ENSG00000205784	4.91562	5.88512	1.87672	3.13585	0.00171355	0.00572389	ARRDC5	645432
ENSG00000142224	4.91298	5.88277	1.86015	3.16252	0.00156409	0.00526753	IL19	29949
ENSG00000143171	13.3471	5.88137	1.13616	5.17652	2.26e-07	1.5e-06	RXRG	6258
ENSG00000229563	4.78409	5.84917	1.95916	2.98554	0.00283074	0.00894479	LINC01204	101927528
ENSG00000115155	62.8337	5.81967	1.42533	4.08305	4.44e-05	0.00020607	OTOF	9381
ENSG00000184012	4.61628	5.79325	1.34123	4.31935	1.56e-05	7.84e-05	TMPRSS2	7113
ENSG00000203797	285.18	5.7925	0.25026	23.1459	1.6e-118	5.82e-116	DDO	8528
ENSG00000050730	4.61328	5.79218	1.28045	4.52354	6.08e-06	3.27e-05	TNIP3	79931
ENSG00000162892	266.8	5.78964	0.383055	15.1144	1.3e-51	1.25e-49	IL24	11009
ENSG00000183709	60.9792	5.78865	1.45145	3.98819	6.66e-05	0.00029885	IFNL2	282616
ENSG00000117152	4.47054	5.75381	1.34227	4.28662	1.81e-05	8.99e-05	RGS4	5999
ENSG00000227685	4.39367	5.72671	1.9114	2.99608	0.00273472	0.00867232	LINC02088	105371582
ENSG00000016402	4.36801	5.72388	1.38128	4.14388	3.41e-05	0.00016158	IL20RA	53832
ENSG00000105880	4.39101	5.72385	1.80381	3.1732	0.00150769	0.00509545	DLX5	1749
ENSG00000123609	5808.51	5.72137	0.223496	25.5994	1.55e-144	8.59e-142	NMI	9111
ENSG00000171855	150.066	5.71943	0.387814	14.7479	3.18e-49	2.83e-47	IFNB1	3456
ENSG00000235670	4.35242	5.71851	1.43282	3.99108	6.58e-05	0.00029537	RPL21P40	100271158
ENSG00000134326	2165.15	5.70771	0.803786	7.10103	1.24e-12	1.53e-11	CMPK2	129607
ENSG00000174123	4.32784	5.70013	1.92149	2.96652	0.00301195	0.00945778	TLR10	81793
ENSG00000164692	4.25278	5.68014	1.83259	3.09951	0.0019384	0.00639095	COL1A2	1278
ENSG00000257612	4.24657	5.67726	1.45039	3.91429	9.07e-05	0.00039805	MIR4307HG	101927081
ENSG00000135363	29.0796	5.67616	0.827496	6.85944	6.91e-12	7.97e-11	LMO2	4005
ENSG00000286081	4.24759	5.67592	1.86056	3.05065	0.00228345	0.00740645	LOC105373682	105373682
ENSG00000153820	4.19661	5.66377	1.91776	2.95332	0.00314377	0.00983252	SPHKAP	80309
ENSG00000182393	219.374	5.65941	0.499382	11.3328	9.02e-30	3.48e-28	IFNL1	282618
ENSG00000204022	45.605	5.64468	0.573947	9.83485	7.97e-23	2.06e-21	LIPJ	142910
ENSG00000171234	4.10537	5.62241	1.85075	3.03791	0.00238227	0.00768962	UGT2B7	7364
ENSG00000100342	8823.78	5.61711	0.101783	55.1873	0	0	APOL1	8542
ENSG00000137198	291.869	5.61072	0.237789	23.5954	4.3e-123	1.71e-120	GMPR	2766
ENSG00000236238	3.9931	5.59393	1.40891	3.97041	7.17e-05	0.00032023	RPS14P10	647034
ENSG00000165194	3.95577	5.57394	1.83615	3.03567	0.00240006	0.00772992	PCDH19	57526
ENSG00000225833	3.89256	5.55425	1.91945	2.89367	0.00380771	0.0116745	GS1-594A7.3	104798195
ENSG00000186207	26.2987	5.52817	0.876076	6.31015	2.79e-10	2.66e-09	LCE5A	254910
ENSG00000255120	16.1192	5.51572	1.04152	5.29582	1.18e-07	8.19e-07	OVOL1-AS1	101927828
ENSG00000089169	3.77146	5.50344	1.84026	2.99058	0.00278449	0.00881454	RPH3A	22895
ENSG00000001084	3.7539	5.49766	1.45145	3.7877	0.00015205	0.00063716	GCLC	2729
ENSG00000231683	3.7539	5.49766	1.45145	3.7877	0.00015205	0.00063716	LOC101927136	101927136
ENSG00000205755	322.877	5.49064	2.17134	2.52868	0.0114491	0.0307845	CRLF2	64109
ENSG00000288705	3.72872	5.48833	1.85736	2.95491	0.00312762	0.00978744	UGT1A5	54579
ENSG00000288702	3.64631	5.46024	1.51623	3.60119	0.00031677	0.00124566	UGT1A3	54659
ENSG00000169271	76.3319	5.44683	0.50425	10.8018	3.37e-27	1.13e-25	HSPB3	8988
ENSG00000162891	94.519	5.44044	0.426623	12.7523	3.03e-37	1.67e-35	IL20	50604
ENSG00000111335	35880.6	5.41516	0.0956294	56.6265	0	0	OAS2	4939
ENSG00000168671	9.49484	5.37976	1.16513	4.61729	3.89e-06	2.15e-05	UGT3A2	167127
ENSG00000251685	3.40578	5.35869	1.87124	2.86371	0.00418706	0.0127041	LOC101929773	101929773
ENSG00000259293	3.38488	5.34397	1.98556	2.69142	0.00711495	0.0202888	LIPC-AS1	101928694
ENSG00000223739	3.35888	5.33661	1.44985	3.6808	0.0002325	0.00093991	RPS15AP15	100130782
ENSG00000242049	3.30976	5.32026	1.903	2.79572	0.00517838	0.0153189	DNAJB8-AS1	285224
ENSG00000260192	3.28837	5.30412	1.94307	2.72977	0.00633789	0.018325	LINC02240	101927460
ENSG00000074771	3.24195	5.28161	1.91211	2.76219	0.00574153	0.0167918	NOX3	50508
ENSG00000249978	3.08661	5.21476	1.91523	2.72279	0.00647332	0.0186727	TRGV7	6981
ENSG00000173391	16873.5	5.19459	0.237189	21.9006	2.56e-106	7.7e-104	OLR1	4973
ENSG00000121933	3.02316	5.17906	1.40493	3.68636	0.00022749	0.00092135	TMIGD3	57413
ENSG00000200360	3.02316	5.17906	1.40493	3.68636	0.00022749	0.00092135	RNU6-792P	106481431
ENSG00000282608	3.02316	5.17906	1.40493	3.68636	0.00022749	0.00092135	ADORA3	140
ENSG00000119917	170122	5.17111	0.0913872	56.5846	0	0	IFIT3	3437
ENSG00000175800	2.95325	5.15112	1.99301	2.5846	0.0097493	0.0267921	OR52B3P	387747
ENSG00000166961	2.901	5.12692	1.90938	2.68512	0.00725036	0.0206182	MS4A15	219995
ENSG00000164694	20.9045	5.11304	0.94449	5.41355	6.18e-08	4.44e-07	FNDC1	84624
ENSG00000223458	2.87674	5.10785	1.39233	3.66856	0.00024392	0.00098163	LMO7DN-IT1	104326189
ENSG00000256192	2.84808	5.09675	1.43942	3.54083	0.00039886	0.00153523	OOEPP2	117751741
ENSG00000242147	2.84459	5.0958	1.95037	2.61274	0.0089819	0.0249354	LINC02677	102723629
ENSG00000172175	1321.89	5.0898	1.32224	3.84938	0.00011842	0.00050715	MALT1	10892
ENSG00000227802	2.82262	5.08937	2.02795	2.50962	0.0120861	0.0322518	DNAJB3	414061
ENSG00000241942	2.82599	5.08721	1.92055	2.64883	0.00807711	0.0227182	RPS20P20	100271233
ENSG00000249272	2.80184	5.0755	1.91138	2.65542	0.00792103	0.0223239	UNC93B8	100887748
ENSG00000227158	2.77421	5.06367	1.51514	3.34204	0.00083166	0.00298325	LOC644909	644909
ENSG00000179178	2.76717	5.06194	1.42193	3.5599	0.000371	0.00143683	TMEM125	128218
ENSG00000196581	2.76266	5.05679	1.93809	2.60916	0.00907635	0.0251374	AJAP1	55966
ENSG00000224958	2.77053	5.05298	1.52387	3.31589	0.00091353	0.0032453	PGM5-AS1	572558
ENSG00000119922	170801	5.04396	0.0868245	58.0937	0	0	IFIT2	3433
ENSG00000136834	2.72948	5.0405	1.92675	2.61607	0.00889482	0.0247338	OR1J1	347168
ENSG00000174837	191.408	5.03996	0.469019	10.7457	6.21e-27	2.06e-25	ADGRE1	2015
ENSG00000243596	2.7258	5.03364	1.94451	2.58864	0.00963568	0.0265076	LOC100419967	100419967
ENSG00000182183	2.70684	5.02969	1.93293	2.60211	0.00926533	0.0255978	SHISAL2A	348378
ENSG00000173432	109.616	5.02438	0.315609	15.9196	4.63e-57	5.27e-55	SAA1	6288
ENSG00000201695	109.616	5.02438	0.315609	15.9196	4.63e-57	5.27e-55	RNA5SP334	106865375
ENSG00000268964	2.68962	5.01607	1.98019	2.53312	0.0113052	0.0304579	ERVV-2	100271846
ENSG00000120279	2.67703	5.0095	1.92343	2.60447	0.00920166	0.0254433	MYCT1	80177
ENSG00000229154	2.63532	4.98894	1.93672	2.57598	0.00999561	0.0273906	KCNQ5-AS1	100873997
ENSG00000121895	164.31	4.98361	0.522972	9.52939	1.58e-21	3.82e-20	TMEM156	80008
ENSG00000216471	7.45835	4.97882	1.23878	4.01914	5.84e-05	0.0002653	RPSAP43	643954
ENSG00000133321	3951.9	4.97504	0.434198	11.458	2.14e-30	8.63e-29	PLAAT4	5920
ENSG00000100346	49.365	4.96886	0.639432	7.77074	7.8e-15	1.16e-13	CACNA1I	8911
ENSG00000130487	184.704	4.94632	0.350961	14.0937	4.15e-45	3.19e-43	KLHDC7B	113730
ENSG00000236091	7.39315	4.94388	1.64782	3.00025	0.00269757	0.00856761	LINC02243	340581
ENSG00000158125	41.6572	4.93957	1.04778	4.71433	2.43e-06	1.39e-05	XDH	7498
ENSG00000187608	154904	4.93736	0.0735818	67.1004	0	0	ISG15	9636
ENSG00000162444	2.54102	4.92932	1.97163	2.50012	0.0124151	0.032999	RBP7	116362
ENSG00000152689	1688.71	4.9107	0.132098	37.1745	1.76e-302	3.15e-299	RASGRP3	25780
ENSG00000120341	38.838	4.90065	0.85635	5.72272	1.05e-08	8.31e-08	SEC16B	89866
ENSG00000260939	2.47384	4.89806	2.04387	2.39647	0.0165539	0.0423782	LOC100128523	100128523
ENSG00000043462	19.4883	4.88795	0.944732	5.1739	2.29e-07	1.52e-06	LCP2	3937
ENSG00000248964	2.41953	4.86874	2.00964	2.42269	0.0154062	0.0398257	LOC101929470	101929470
ENSG00000231645	121.606	4.86266	0.324208	14.9986	7.5e-51	7.1e-49	KRT17P6	284196
ENSG00000135114	131577	4.86126	0.0611679	79.4741	0	0	OASL	8638
ENSG00000224034	4.07484	4.86042	1.68138	2.89074	0.00384342	0.0117666	LINC02561	110806285
ENSG00000250827	2.38035	4.8466	2.06458	2.34749	0.0189002	0.0474922	MFSD4BP1	100128154
ENSG00000168016	22191.3	4.83738	1.48489	3.25774	0.00112304	0.0039144	TRANK1	9881
ENSG00000235621	36.7139	4.83689	0.564792	8.56402	1.09e-17	2.08e-16	LINC00494	284749
ENSG00000077522	30.2315	4.83324	0.66844	7.23062	4.81e-13	6.19e-12	ACTN2	88
ENSG00000225383	10.1972	4.82644	1.03238	4.67506	2.94e-06	1.66e-05	SFTA1P	207107
ENSG00000070190	353.854	4.81686	0.187287	25.7191	7.14e-146	4.08e-143	DAPP1	27071
ENSG00000251051	3.96471	4.80942	1.81384	2.65151	0.00801328	0.0225594	ELL2P2	100421143
ENSG00000188778	13.6032	4.77832	1.26342	3.78206	0.00015554	0.00065062	ADRB3	155
ENSG00000177409	26924.6	4.77471	0.117372	40.6802	0	0	SAMD9L	219285
ENSG00000083635	106.249	4.76685	1.76629	2.69879	0.00695919	0.0199155	NUFIP1	26747
ENSG00000181514	2.24932	4.76005	2.02806	2.34709	0.0189204	0.047531	LOC643067	643067
ENSG00000234362	55.2615	4.75921	0.747759	6.36464	1.96e-10	1.9e-09	LINC01914	101929723
ENSG00000241791	2.26377	4.75858	1.70495	2.79104	0.00525388	0.0155247	RN7SL817P	106481144
ENSG00000126262	2.25672	4.75799	2.01817	2.35758	0.0183946	0.0463964	FFAR2	2867
ENSG00000165949	1753.83	4.75623	0.192447	24.7145	7.48e-135	3.51e-132	IFI27	3429
ENSG00000071909	19.5039	4.74694	0.904028	5.25088	1.51e-07	1.03e-06	MYO3B	140469
ENSG00000182179	1652.83	4.74208	0.215484	22.0066	2.49e-107	7.66e-105	UBA7	7318
ENSG00000283726	1652.83	4.74208	0.215484	22.0066	2.49e-107	7.66e-105	MIR5193	100847079
ENSG00000168004	2.18032	4.7115	2.0115	2.34229	0.0191661	0.0480622	PLAAT5	117245
ENSG00000202063	2.17731	4.70775	1.52282	3.09147	0.00199169	0.00654685	RNA5SP79	100873313
ENSG00000116962	26.1999	4.70685	1.02699	4.58317	4.58e-06	2.51e-05	NID1	4811
ENSG00000156920	11.8874	4.68922	1.14101	4.10971	3.96e-05	0.0001849	ADGRG4	139378
ENSG00000138166	31277.8	4.66679	0.0843755	55.3098	0	0	DUSP5	1847
ENSG00000007264	122.557	4.65	0.589743	7.8848	3.15e-15	4.89e-14	MATK	4145
ENSG00000068079	14170.6	4.62057	0.169394	27.2771	7.93e-164	5.68e-161	IFI35	3430
ENSG00000197721	3.46133	4.61751	1.87772	2.4591	0.0139285	0.0364556	CR1L	1379
ENSG00000244703	3.46133	4.61751	1.87772	2.4591	0.0139285	0.0364556	CD46P1	4182
ENSG00000268916	52.9765	4.60748	0.782125	5.89098	3.84e-09	3.21e-08	CSAG3	389903
ENSG00000231766	5.5572	4.59899	1.39165	3.30471	0.00095074	0.00336416	MTCO2P5	107075181
ENSG00000106302	30.4365	4.58303	1.07796	4.25158	2.12e-05	0.00010378	HYAL4	23553
ENSG00000178055	17.8294	4.57194	1.07196	4.26503	2e-05	9.82e-05	PRSS42P	339906
ENSG00000179674	13.6871	4.56661	0.873965	5.22516	1.74e-07	1.18e-06	ARL14	80117
ENSG00000137628	56397.6	4.56634	0.330643	13.8105	2.2e-43	1.55e-41	DDX60	55601
ENSG00000174808	405.667	4.56552	0.191797	23.8039	3.05e-125	1.24e-122	BTC	685
ENSG00000146374	620.919	4.5449	0.173817	26.1477	1.05e-150	6.76e-148	RSPO3	84870
ENSG00000173702	133.286	4.5422	0.271945	16.7026	1.25e-62	1.67e-60	MUC13	56667
ENSG00000167165	10.6299	4.53555	1.59047	2.8517	0.00434858	0.0131334	UGT1A6	54578
ENSG00000239861	1.90826	4.53203	1.69948	2.66672	0.00765964	0.0216663	RPL21P96	100271428
ENSG00000153253	884.176	4.52621	0.1626	27.8365	1.57e-170	1.19e-167	SCN3A	6328
ENSG00000104321	72.7472	4.52311	0.563141	8.03193	9.6e-16	1.55e-14	TRPA1	8989
ENSG00000131737	47.9476	4.50145	0.44244	10.1741	2.59e-24	7.35e-23	KRT34	3885
ENSG00000143771	775.134	4.49229	1.06744	4.20846	2.57e-05	0.00012417	CNIH4	29097
ENSG00000232759	90.0357	4.48692	1.30159	3.44726	0.00056631	0.00210884	LOC100506178	100506178
ENSG00000258689	5.45811	4.48317	1.721	2.60499	0.00918782	0.0254122	LINC01269	103695436
ENSG00000110492	810.798	4.48031	0.241604	18.5441	9.11e-77	1.59e-74	MDK	4192
ENSG00000196611	15.4587	4.46082	1.04185	4.28164	1.86e-05	9.17e-05	MMP1	4312
ENSG00000188293	28.5084	4.45855	0.555681	8.02357	1.03e-15	1.65e-14	IGFL1	374918
ENSG00000254139	4.93532	4.44207	1.73766	2.55635	0.0105778	0.0287664	LOC286178	286178
ENSG00000072858	320.5	4.44125	0.205758	21.5848	2.5e-103	7.45e-101	SIDT1	54847
ENSG00000132463	1365.72	4.43901	0.580741	7.64369	2.11e-14	3.06e-13	GRSF1	2926
ENSG00000271503	17376.3	4.43772	0.143059	31.0203	2.87e-211	2.83e-208	CCL5	6352
ENSG00000203650	101.557	4.42067	0.461614	9.57655	1e-21	2.45e-20	LINC01285	101928287
ENSG00000184719	43.533	4.42047	0.49194	8.9858	2.57e-19	5.4e-18	RNLS	55328
ENSG00000181381	14229.3	4.41775	0.470942	9.38068	6.55e-21	1.52e-19	DDX60L	91351
ENSG00000142677	298.893	4.40011	0.187042	23.5247	2.28e-122	8.97e-120	IL22RA1	58985
ENSG00000231574	29.494	4.39314	0.609373	7.20927	5.63e-13	7.19e-12	LINC02015	102724550
ENSG00000089006	4.80695	4.38692	1.45376	3.01764	0.00254755	0.00814367	SNX5	27131
ENSG00000125850	4.80695	4.38692	1.45376	3.01764	0.00254755	0.00814367	OVOL2	58495
ENSG00000212232	4.80695	4.38692	1.45376	3.01764	0.00254755	0.00814367	SNORD17	692086
ENSG00000170345	26393.6	4.36644	0.265386	16.4532	7.96e-61	9.73e-59	FOS	2353
ENSG00000163827	20.4264	4.35606	1.06683	4.08319	4.44e-05	0.00020597	LRRC2	79442
ENSG00000010030	105.246	4.35278	0.658441	6.61073	3.82e-11	4.04e-10	ETV7	51513
ENSG00000153233	378.143	4.33255	0.220982	19.6058	1.38e-85	2.97e-83	PTPRR	5801
ENSG00000237862	19.6413	4.30096	0.913455	4.70845	2.5e-06	1.42e-05	LOC100506271	100506271
ENSG00000150556	13.7239	4.29958	0.847686	5.07214	3.93e-07	2.51e-06	LYPD6B	130576
ENSG00000175874	1588.99	4.28591	0.272106	15.7509	6.77e-56	7.39e-54	CREG2	200407
ENSG00000236049	15.4826	4.27974	0.951264	4.499	6.83e-06	3.64e-05	LINC01920	101929260
ENSG00000025708	67.4738	4.27129	0.530938	8.0448	8.64e-16	1.4e-14	TYMP	1890
ENSG00000177989	67.4738	4.27129	0.530938	8.0448	8.64e-16	1.4e-14	ODF3B	440836
ENSG00000284194	67.4738	4.27129	0.530938	8.0448	8.64e-16	1.4e-14	SCO2	9997
ENSG00000089127	7879.75	4.25106	0.370259	11.4813	1.64e-30	6.64e-29	OAS1	4938
ENSG00000121858	1014.16	4.241	0.171522	24.7257	5.66e-135	2.68e-132	TNFSF10	8743
ENSG00000146666	41.3992	4.24033	0.705015	6.01453	1.8e-09	1.56e-08	LINC00525	84847
ENSG00000132109	8982.85	4.23354	0.084856	49.8909	0	0	TRIM21	6737
ENSG00000176532	1398.14	4.22093	0.132939	31.7508	3.09e-221	3.21e-218	PRR15	222171
ENSG00000121769	1019.68	4.21184	0.279375	15.0759	2.33e-51	2.24e-49	FABP3	2170
ENSG00000238042	4.48511	4.21016	1.27349	3.306	0.00094637	0.00334959	LINC02257	105372950
ENSG00000019186	842.718	4.19998	0.368773	11.3891	4.74e-30	1.86e-28	CYP24A1	1591
ENSG00000116701	4500.36	4.18553	0.122865	34.0661	2.35e-254	2.89e-251	NCF2	4688
ENSG00000174226	2.59995	4.1794	1.72662	2.42057	0.0154964	0.0399956	SNX31	169166
ENSG00000149131	509.702	4.17581	0.217362	19.2113	2.97e-82	5.95e-80	SERPING1	710
ENSG00000176928	141.113	4.17525	0.29684	14.0657	6.17e-45	4.7e-43	GCNT4	51301
ENSG00000188959	109.803	4.17387	0.304488	13.7078	9.12e-43	6.24e-41	C9orf152	401546
ENSG00000226358	21.1583	4.15928	1.08019	3.85051	0.00011787	0.00050524	KRT8P38	100418799
ENSG00000148677	370.852	4.15126	0.173964	23.8627	7.47e-126	3.1e-123	ANKRD1	27063
ENSG00000120738	24244.8	4.11362	0.192227	21.3999	1.34e-101	3.88e-99	EGR1	1958
ENSG00000123977	6.34376	4.11342	1.08657	3.78569	0.00015329	0.00064201	DAW1	164781
ENSG00000049089	257.512	4.08241	1.26154	3.23604	0.00121198	0.00419249	COL9A2	1298
ENSG00000268629	3.91844	4.07155	1.35944	2.99501	0.00274435	0.00870075	TEX13A	56157
ENSG00000251515	3.98897	4.06839	1.34388	3.02736	0.00246704	0.00792233	CFAP53P1	100129040
ENSG00000206875	3.92195	4.03945	1.32272	3.0539	0.00225888	0.00734067	RNU6-761P	106480607
ENSG00000222317	1.37018	4.03745	1.69053	2.38828	0.0169275	0.0432136	RNA5SP118	100873388
ENSG00000109511	183.321	4.03581	0.244853	16.4826	4.89e-61	6.16e-59	ANXA10	11199
ENSG00000185518	1282.95	4.03414	0.252081	16.0034	1.21e-57	1.39e-55	SV2B	9899
ENSG00000183668	28.4333	4.02787	0.710034	5.67278	1.4e-08	1.1e-07	PSG9	5678
ENSG00000241104	28.4333	4.02787	0.710034	5.67278	1.4e-08	1.1e-07	LOC284344	284344
ENSG00000092054	7.81546	4.02485	1.07503	3.74394	0.00018116	0.0007488	MYH7	4625
ENSG00000205413	105986	4.00157	0.0946281	42.2874	0	0	SAMD9	54809
ENSG00000117226	2916.93	3.99967	0.156276	25.5936	1.8e-144	9.71e-142	GBP3	2635
ENSG00000134575	978.118	3.96798	1.27547	3.111	0.00186454	0.00618013	ACP2	53
ENSG00000163825	6.80856	3.96635	1.67825	2.36339	0.0181086	0.0457748	RTP3	83597
ENSG00000214049	763.801	3.95526	0.141779	27.8973	2.88e-171	2.22e-168	UCA1	652995
ENSG00000159261	19.8503	3.9507	1.1454	3.44917	0.0005623	0.0020955	CLDN14	23562
ENSG00000198788	5.11718	3.94733	1.6717	2.36127	0.0182124	0.0460076	MUC2	4583
ENSG00000152778	143604	3.93009	0.161254	24.372	3.39e-131	1.55e-128	IFIT5	24138
ENSG00000185745	143604	3.93009	0.161254	24.372	3.39e-131	1.55e-128	IFIT1	3434
ENSG00000218857	14.7182	3.92478	0.712477	5.50864	3.62e-08	2.67e-07	LOC100421246	100421246
ENSG00000135604	773.556	3.92028	0.246429	15.9084	5.55e-57	6.29e-55	STX11	8676
ENSG00000198185	5.1173	3.90647	1.27392	3.06649	0.00216589	0.00706528	ZNF334	55713
ENSG00000123358	51182.7	3.90033	0.151103	25.8123	6.45e-147	3.79e-144	NR4A1	3164
ENSG00000251002	30.9485	3.89783	0.654624	5.9543	2.61e-09	2.23e-08	LOC105370401	105370401
ENSG00000067064	5251.62	3.86195	1.32104	2.92342	0.00346214	0.0107298	IDI1	3422
ENSG00000140511	156.048	3.85877	0.230464	16.7434	6.32e-63	8.53e-61	HAPLN3	145864
ENSG00000215182	18.8604	3.84888	0.692961	5.55425	2.79e-08	2.09e-07	MUC5AC	4586
ENSG00000129744	94.3838	3.83953	0.3683	10.425	1.91e-25	5.78e-24	ART1	417
ENSG00000164488	14.6027	3.83883	1.12287	3.41877	0.00062906	0.00232162	DACT2	168002
ENSG00000231131	65.6197	3.83554	0.40099	9.56519	1.12e-21	2.73e-20	LNCAROD	101928687
ENSG00000224259	62.9672	3.83043	0.581524	6.58688	4.49e-11	4.7e-10	LINC01133	100505633
ENSG00000121797	14.2288	3.76818	1.14355	3.29517	0.00098363	0.00346932	CCRL2	9034
ENSG00000263639	23.3336	3.76105	0.919888	4.0886	4.34e-05	0.00020158	MSMB	4477
ENSG00000112499	17.6267	3.73937	1.00522	3.71996	0.00019925	0.00081639	SLC22A2	6582
ENSG00000181963	11.2388	3.73868	0.820953	4.55408	5.26e-06	2.85e-05	OR52K2	119774
ENSG00000229781	261.606	3.73791	0.235402	15.8789	8.88e-57	1e-54	RRN3P4	100129955
ENSG00000001626	52.8047	3.73087	0.44679	8.35039	6.8e-17	1.21e-15	CFTR	1080
ENSG00000128335	2381.41	3.72186	0.827346	4.49855	6.84e-06	3.65e-05	APOL2	23780
ENSG00000253789	6.55967	3.71438	0.990763	3.74901	0.00017754	0.00073506	NARS1P2	100287895
ENSG00000170581	861.602	3.71041	0.819269	4.52893	5.93e-06	3.19e-05	STAT2	6773
ENSG00000141255	407.671	3.70988	0.198467	18.6927	5.68e-78	1.02e-75	SPATA22	84690
ENSG00000167723	407.671	3.70988	0.198467	18.6927	5.68e-78	1.02e-75	TRPV3	162514
ENSG00000162894	604.585	3.68609	0.388914	9.4779	2.59e-21	6.19e-20	FCMR	9214
ENSG00000257725	13.8215	3.67461	0.682582	5.3834	7.31e-08	5.19e-07	LINC02399	105369891
ENSG00000234073	63.4926	3.66411	0.342876	10.6864	1.18e-26	3.86e-25	LOC107986032	107986032
ENSG00000080031	615.103	3.64669	0.16366	22.2822	5.5e-110	1.77e-107	PTPRH	5794
ENSG00000279727	57.7781	3.63841	0.596649	6.09807	1.07e-09	9.56e-09	LINC02033	105377031
ENSG00000168685	1385.43	3.63788	0.409407	8.88574	6.35e-19	1.3e-17	IL7R	3575
ENSG00000163554	18.5571	3.6375	0.790843	4.59952	4.23e-06	2.33e-05	SPTA1	6708
ENSG00000007171	34.3471	3.62355	0.869054	4.16954	3.05e-05	0.00014565	NOS2	4843
ENSG00000172183	12362.1	3.6151	0.0887324	40.7417	0	0	ISG20	3669
ENSG00000225286	10.3887	3.61113	1.00512	3.59275	0.0003272	0.00128311	RPS2P30	100270911
ENSG00000177294	43.913	3.60935	0.466337	7.73978	9.96e-15	1.47e-13	FBXO39	162517
ENSG00000164651	1157.29	3.59816	0.139198	25.8493	2.48e-147	1.48e-144	SP8	221833
ENSG00000120949	31.041	3.58277	0.91516	3.91491	9.04e-05	0.00039712	TNFRSF8	943
ENSG00000072952	19.4667	3.57801	0.897737	3.98559	6.73e-05	0.00030203	IRAG1	10335
ENSG00000153993	4604.39	3.56262	0.152842	23.3092	3.58e-120	1.34e-117	SEMA3D	223117
ENSG00000137745	247.073	3.55558	0.312521	11.3771	5.44e-30	2.13e-28	MMP13	4322
ENSG00000125538	693.026	3.55462	0.148927	23.8683	6.54e-126	2.74e-123	IL1B	3553
ENSG00000075213	1311.86	3.55212	0.0877546	40.4779	0	0	SEMA3A	10371
ENSG00000116833	53.3037	3.54438	0.717233	4.94174	7.74e-07	4.75e-06	NR5A2	2494
ENSG00000246022	7.51417	3.54206	1.28207	2.76276	0.00573155	0.0167689	ALDH1L1-AS2	100862662
ENSG00000117450	1611.62	3.54026	1.02676	3.44801	0.00056473	0.00210376	PRDX1	5052
ENSG00000228742	22.2681	3.53287	0.678627	5.20591	1.93e-07	1.3e-06	LINC02577	111216280
ENSG00000175482	475.05	3.52482	0.489887	7.19518	6.24e-13	7.92e-12	POLD4	57804
ENSG00000175505	475.05	3.52482	0.489887	7.19518	6.24e-13	7.92e-12	CLCF1	23529
ENSG00000174279	7.79177	3.52297	1.13701	3.09845	0.00194539	0.00640972	EVX2	344191
ENSG00000186832	189.731	3.52273	0.289059	12.1869	3.65e-34	1.73e-32	KRT16	3868
ENSG00000243137	335.138	3.51792	0.21075	16.6924	1.49e-62	1.98e-60	PSG4	5672
ENSG00000221963	18342.6	3.51063	0.0678282	51.7577	0	0	APOL6	80830
ENSG00000259256	13.777	3.49377	0.841018	4.15422	3.26e-05	0.00015482	LINC01895	105371964
ENSG00000174502	8.80653	3.48992	1.18807	2.93748	0.0033089	0.0102959	SLC26A9	115019
ENSG00000234488	2.81353	3.48723	1.35224	2.57884	0.00991322	0.0271988	RPL27P6	647112
ENSG00000233610	20.7954	3.47592	0.945638	3.67574	0.00023717	0.00095709	LINC00462	100129597
ENSG00000184979	2170.8	3.47064	0.280009	12.3947	2.79e-35	1.39e-33	USP18	11274
ENSG00000140107	36.9471	3.46588	0.895924	3.8685	0.00010951	0.00047279	SLC25A47	283600
ENSG00000228971	36.2603	3.46037	0.653753	5.29308	1.2e-07	8.3e-07	LINC02607	100996635
ENSG00000169429	3580.48	3.45612	0.135356	25.5336	8.36e-144	4.42e-141	CXCL8	3576
ENSG00000196417	8.10017	3.45578	0.853162	4.05056	5.11e-05	0.00023421	ZNF765	91661
ENSG00000203326	8.10017	3.45578	0.853162	4.05056	5.11e-05	0.00023421	ZNF525	170958
ENSG00000213799	8.10017	3.45578	0.853162	4.05056	5.11e-05	0.00023421	ZNF845	91664
ENSG00000100298	12.1099	3.44074	0.713109	4.82499	1.4e-06	8.27e-06	APOBEC3H	164668
ENSG00000177606	1987.85	3.41706	0.805806	4.24054	2.23e-05	0.00010863	JUN	3725
ENSG00000162772	730.354	3.41129	0.150766	22.6264	2.38e-113	8.3e-111	ATF3	467
ENSG00000285823	16.5231	3.40973	1.24398	2.74099	0.00612544	0.0177812	LINC02793	105376879
ENSG00000218020	6.0109	3.40911	1.27887	2.66571	0.00768263	0.0217217	THAP12P5	100129074
ENSG00000127445	63.795	3.4049	1.36979	2.48571	0.0129295	0.0342182	PIN1	5300
ENSG00000157077	562.174	3.39772	1.1779	2.88456	0.00391963	0.0119869	ZFYVE9	9372
ENSG00000228203	45.0548	3.39331	0.439669	7.71789	1.18e-14	1.74e-13	GRASLND	386597
ENSG00000133401	33946.9	3.38699	0.131522	25.7522	3.04e-146	1.76e-143	PDZD2	23037
ENSG00000095637	797.919	3.38448	0.108985	31.0547	9.87e-212	9.96e-209	SORBS1	10580
ENSG00000067798	487.562	3.37752	0.176947	19.0877	3.19e-81	6.26e-79	NAV3	89795
ENSG00000156804	3521.37	3.37432	0.131491	25.662	3.11e-145	1.75e-142	FBXO32	114907
ENSG00000079385	1528.19	3.36575	0.0928237	36.2596	7.02e-288	1.15e-284	CEACAM1	634
ENSG00000176907	58213.1	3.36214	0.282901	11.8845	1.42e-32	6.28e-31	TCIM	56892
ENSG00000261652	1443.37	3.34975	0.155359	21.5614	4.14e-103	1.23e-100	C15orf65	145788
ENSG00000153294	17.5541	3.33299	0.956534	3.48445	0.00049315	0.00186264	ADGRF4	221393
ENSG00000166510	3393.97	3.31361	0.249347	13.2891	2.68e-40	1.66e-38	CCDC68	80323
ENSG00000226297	5.79025	3.29637	1.09731	3.00403	0.00266427	0.00847277	RPL17P14	100270941
ENSG00000115963	7356.23	3.29337	0.184247	17.8748	1.85e-71	2.88e-69	RND3	390
ENSG00000204642	97.8465	3.28615	0.277921	11.8241	2.93e-32	1.28e-30	HLA-F	3134
ENSG00000184497	105.652	3.28454	0.659493	4.9804	6.35e-07	3.93e-06	TMEM255B	348013
ENSG00000156510	140.182	3.28074	0.258914	12.6711	8.55e-37	4.62e-35	HKDC1	80201
ENSG00000130589	56165.2	3.27795	0.121484	26.9825	2.37e-160	1.61e-157	HELZ2	85441
ENSG00000221845	35.2417	3.25701	0.636361	5.11818	3.09e-07	2.01e-06	LINC02902	401335
ENSG00000105889	79.7847	3.24622	0.310865	10.4425	1.59e-25	4.86e-24	STEAP1B	256227
ENSG00000179428	79.7847	3.24622	0.310865	10.4425	1.59e-25	4.86e-24	IL6-AS1	541472
ENSG00000092295	349.368	3.24279	1.20509	2.69091	0.00712584	0.0203167	TGM1	7051
ENSG00000152611	23.5388	3.24245	0.697028	4.65182	3.29e-06	1.84e-05	CAPSL	133690
ENSG00000129451	7.49175	3.24222	1.34134	2.41716	0.0156421	0.0403294	KLK10	5655
ENSG00000204592	5700.89	3.24026	0.100165	32.3493	1.42e-229	1.51e-226	HLA-E	3133
ENSG00000078018	1182.74	3.23836	0.340597	9.50789	1.95e-21	4.67e-20	MAP2	4133
ENSG00000253349	2.39338	3.23051	1.3506	2.3919	0.0167616	0.0428483	COX6B1P6	100462851
ENSG00000124429	45.1698	3.22794	0.629709	5.12608	2.96e-07	1.93e-06	POF1B	79983
ENSG00000107201	58448.1	3.22307	0.178771	18.0291	1.15e-72	1.82e-70	DDX58	23586
ENSG00000165264	58448.1	3.22307	0.178771	18.0291	1.15e-72	1.82e-70	NDUFB6	4712
ENSG00000197579	58448.1	3.22307	0.178771	18.0291	1.15e-72	1.82e-70	TOPORS	10210
ENSG00000184898	1226.27	3.21866	0.129889	24.7801	1.47e-135	7.05e-133	RBM43	375287
ENSG00000160446	372.887	3.2128	0.543109	5.91557	3.31e-09	2.79e-08	ZDHHC12	84885
ENSG00000096996	61.165	3.20205	0.340634	9.40026	5.44e-21	1.27e-19	IL12RB1	3594
ENSG00000178150	70.4409	3.19843	0.283495	11.2821	1.61e-29	6.14e-28	ZNF114	163071
ENSG00000236013	16.0013	3.19223	0.865677	3.68755	0.00022642	0.00091749	LOC100507477	100507477
ENSG00000213557	8.64685	3.19172	1.23821	2.57769	0.00994627	0.0272743	RPL31P43	392382
ENSG00000178033	519.258	3.18846	0.387311	8.23231	1.84e-16	3.16e-15	CALHM5	254228
ENSG00000257368	3.18322	3.18524	1.36225	2.33822	0.0193758	0.0485294	LOC100128248	100128248
ENSG00000204941	46.5614	3.17892	0.45131	7.04376	1.87e-12	2.27e-11	PSG5	5673
ENSG00000115008	580.084	3.17351	0.156168	20.321	8.38e-92	2e-89	IL1A	3552
ENSG00000250685	7.67262	3.17044	1.2981	2.44238	0.014591	0.0379924	LOC654780	654780
ENSG00000234256	5.2202	3.16903	1.16378	2.72305	0.0064682	0.0186607	PTCD2P2	100132487
ENSG00000248771	14.0994	3.1682	0.94043	3.36889	0.00075473	0.00273671	SMIM31	100505989
ENSG00000154642	3764.53	3.16512	0.447698	7.06976	1.55e-12	1.9e-11	C21orf91	54149
ENSG00000240770	3764.53	3.16512	0.447698	7.06976	1.55e-12	1.9e-11	C21orf91-OT1	246312
ENSG00000241111	51.4962	3.15408	0.650616	4.84784	1.25e-06	7.44e-06	PRICKLE2-AS1	100652759
ENSG00000142694	307.493	3.13845	0.28295	11.0919	1.37e-28	4.99e-27	EVA1B	55194
ENSG00000130940	356.632	3.13635	0.176005	17.8196	4.98e-71	7.66e-69	CASZ1	54897
ENSG00000116786	2905.88	3.13539	1.32103	2.37345	0.0176228	0.0447507	PLEKHM2	23207
ENSG00000164181	9.3113	3.12466	1.23527	2.52954	0.0114213	0.0307244	ELOVL7	79993
ENSG00000233671	21.7208	3.12175	0.565022	5.52501	3.29e-08	2.45e-07	CENPNP1	100132498
ENSG00000227145	81.9406	3.11672	0.447345	6.96715	3.23e-12	3.85e-11	IL21-AS1	100996941
ENSG00000106588	2144.48	3.11572	1.21537	2.56361	0.0103591	0.0282549	PSMA2	5683
ENSG00000136197	2144.48	3.11572	1.21537	2.56361	0.0103591	0.0282549	C7orf25	79020
ENSG00000026950	4153.35	3.11325	0.18896	16.4757	5.49e-61	6.73e-59	BTN3A1	11119
ENSG00000111801	4153.35	3.11325	0.18896	16.4757	5.49e-61	6.73e-59	BTN3A3	10384
ENSG00000112763	4153.35	3.11325	0.18896	16.4757	5.49e-61	6.73e-59	BTN2A1	11120
ENSG00000124549	4153.35	3.11325	0.18896	16.4757	5.49e-61	6.73e-59	BTN2A3P	54718
ENSG00000186470	4153.35	3.11325	0.18896	16.4757	5.49e-61	6.73e-59	BTN3A2	11118
ENSG00000168427	162.814	3.11005	0.318979	9.75	1.84e-22	4.68e-21	KLHL30	377007
ENSG00000221866	84.1791	3.10745	0.341189	9.10771	8.41e-20	1.82e-18	PLXNA4	91584
ENSG00000167995	7911.1	3.10462	0.305394	10.1659	2.81e-24	7.97e-23	BEST1	7439
ENSG00000070808	33.4246	3.09125	1.00243	3.08376	0.00204404	0.00670557	CAMK2A	815
ENSG00000249464	123.382	3.08562	0.33223	9.28761	1.58e-20	3.57e-19	LINC01091	285419
ENSG00000168280	7.06839	3.08031	0.913446	3.37218	0.00074575	0.00270666	KIF5C	3800
ENSG00000251173	18.1656	3.07747	0.96724	3.18171	0.00146409	0.00496559	UCHL1-DT	101410542
ENSG00000268223	27.9813	3.07741	0.931977	3.30202	0.00095991	0.00339445	ARL14EPL	644100
ENSG00000130813	11001.6	3.07687	0.145372	21.1655	1.99e-99	5.4e-97	SHFL	55337
ENSG00000235531	203.104	3.07368	0.257125	11.9541	6.18e-33	2.78e-31	MSC-AS1	100132891
ENSG00000134668	48.4597	3.06936	0.35578	8.62712	6.29e-18	1.21e-16	SPOCD1	90853
ENSG00000125740	11718.9	3.06203	0.169777	18.0356	1.02e-72	1.65e-70	FOSB	2354
ENSG00000198133	414.022	3.05261	0.234644	13.0095	1.08e-38	6.41e-37	TMEM229B	161145
ENSG00000105278	13.9743	3.04787	0.670429	4.54615	5.46e-06	2.96e-05	ZFR2	23217
ENSG00000104856	2206.73	3.04729	0.107945	28.23	2.5e-175	2.01e-172	RELB	5971
ENSG00000095739	2037.98	3.04503	0.121619	25.0376	2.38e-138	1.17e-135	BAMBI	25805
ENSG00000122643	24029.9	3.04072	0.0907069	33.5224	2.27e-246	2.71e-243	NT5C3A	51251
ENSG00000169220	342.223	3.03578	0.229455	13.2304	5.86e-40	3.59e-38	RGS14	10636
ENSG00000135074	16.065	3.03488	0.917479	3.30785	0.00094017	0.00332973	ADAM19	8728
ENSG00000141497	143.516	3.02345	0.249417	12.1221	8.07e-34	3.74e-32	ZMYND15	84225
ENSG00000138496	13323.5	3.02264	0.198569	15.2221	2.52e-52	2.53e-50	PARP9	83666
ENSG00000173212	892.708	3.00926	0.123684	24.3302	9.38e-131	4.15e-128	MAB21L3	126868
ENSG00000172927	179.408	3.00613	0.24911	12.0675	1.57e-33	7.18e-32	MYEOV	26579
ENSG00000258733	93.5252	3.00501	0.24761	12.1361	6.8e-34	3.17e-32	LINC02328	101928767
ENSG00000139112	13002.3	2.99134	0.262258	11.4061	3.9e-30	1.55e-28	GABARAPL1	23710
ENSG00000118503	26306.1	2.98648	0.157892	18.9147	8.62e-80	1.62e-77	TNFAIP3	7128
ENSG00000233534	3.94837	2.97799	1.24599	2.39006	0.0168456	0.0430446	LINC02524	105378013
ENSG00000146411	699.933	2.97738	0.1779	16.7363	7.13e-63	9.59e-61	SLC2A12	154091
ENSG00000138646	21653.1	2.97566	0.21852	13.6174	3.16e-42	2.09e-40	HERC5	51191
ENSG00000196116	7800.75	2.97309	0.0748982	39.695	0	0	TDRD7	23424
ENSG00000095932	49.2937	2.97101	0.405098	7.33405	2.23e-13	2.96e-12	SMIM24	284422
ENSG00000214108	147.317	2.96845	0.255868	11.6015	4.05e-31	1.68e-29	TPT1P5	100421420
ENSG00000183431	47.575	2.9664	0.878198	3.37783	0.00073061	0.00265756	SF3A3	10946
ENSG00000087302	5844.83	2.96021	0.307413	9.62942	6.01e-22	1.48e-20	RTRAF	51637
ENSG00000105568	1524.17	2.95859	1.03094	2.8698	0.00410729	0.0125035	PPP2R1A	5518
ENSG00000274380	1524.17	2.95859	1.03094	2.8698	0.00410729	0.0125035	MIR6801	102466984
ENSG00000196668	39.917	2.95183	0.603437	4.89169	1e-06	6.03e-06	LINC00173	100287569
ENSG00000197506	445.127	2.95076	0.262123	11.2572	2.14e-29	8.07e-28	SLC28A3	64078
ENSG00000170298	110.688	2.94849	0.233582	12.6229	1.58e-36	8.43e-35	LGALS9B	284194
ENSG00000115718	344.326	2.93935	0.21728	13.528	1.07e-41	6.93e-40	PROC	5624
ENSG00000169203	383.692	2.93771	0.553047	5.31185	1.09e-07	7.53e-07	NPIPB12	440353
ENSG00000183336	383.692	2.93771	0.553047	5.31185	1.09e-07	7.53e-07	BOLA2	552900
ENSG00000254634	383.692	2.93771	0.553047	5.31185	1.09e-07	7.53e-07	SMG1P6	100422558
ENSG00000260727	383.692	2.93771	0.553047	5.31185	1.09e-07	7.53e-07	SLC7A5P1	81893
ENSG00000261740	383.692	2.93771	0.553047	5.31185	1.09e-07	7.53e-07	BOLA2-SMG1P6	107282092
ENSG00000172403	413.666	2.93711	0.199806	14.6998	6.46e-49	5.62e-47	SYNPO2	171024
ENSG00000184611	17.4227	2.93513	0.872907	3.36248	0.00077245	0.00279379	KCNH7	90134
ENSG00000074855	714.458	2.93419	0.544551	5.38827	7.11e-08	5.06e-07	ANO8	57719
ENSG00000231763	7.72863	2.92996	0.737697	3.97177	7.13e-05	0.00031895	SLC66A2P1	106479032
ENSG00000255259	7.8767	2.92413	0.988743	2.95742	0.00310227	0.00971739	ZNF123P	100188891
ENSG00000154153	8907.53	2.92358	0.116836	25.023	3.44e-138	1.67e-135	RETREG1	54463
ENSG00000073756	10001.4	2.92334	0.358053	8.16455	3.23e-16	5.44e-15	PTGS2	5743
ENSG00000114541	524.815	2.92327	0.120065	24.3474	6.17e-131	2.76e-128	FRMD4B	23150
ENSG00000197646	270.739	2.91864	0.186088	15.6842	1.94e-55	2.08e-53	PDCD1LG2	80380
ENSG00000178502	1910.72	2.91724	1.02745	2.8393	0.00452125	0.0135955	KLHL11	55175
ENSG00000163083	32.2276	2.91695	0.545296	5.3493	8.83e-08	6.2e-07	INHBB	3625
ENSG00000154319	47.6035	2.90953	0.349371	8.32791	8.23e-17	1.46e-15	FAM167A	83648
ENSG00000214929	5.6035	2.90485	1.21039	2.39993	0.0163984	0.0420373	SPATA31D1	389763
ENSG00000139178	23077.3	2.90332	0.125729	23.0919	5.58e-118	2e-115	C1RL	51279
ENSG00000159403	23077.3	2.90332	0.125729	23.0919	5.58e-118	2e-115	C1R	715
ENSG00000166396	287.569	2.90176	0.287865	10.0803	6.75e-24	1.86e-22	SERPINB7	8710
ENSG00000155511	16.6674	2.89922	0.711902	4.0725	4.65e-05	0.00021457	GRIA1	2890
ENSG00000099260	4896.83	2.88202	0.242076	11.9054	1.11e-32	4.92e-31	PALMD	54873
ENSG00000164171	22820.7	2.88082	0.118259	24.3604	4.5e-131	2.04e-128	ITGA2	3673
ENSG00000238266	683.517	2.87956	0.494875	5.81877	5.93e-09	4.83e-08	LINC00707	100507127
ENSG00000203801	12.2928	2.87519	0.872574	3.29507	0.00098398	0.00347023	LINC00222	387111
ENSG00000078401	7734.8	2.87197	0.0980578	29.2885	1.45e-188	1.33e-185	EDN1	1906
ENSG00000151882	1932.26	2.87108	0.157799	18.1945	5.7e-74	9.44e-72	CCL28	56477
ENSG00000185236	1610.61	2.87021	0.965075	2.97408	0.00293873	0.00925	RAB11B	9230
ENSG00000137507	22.5624	2.86862	0.677048	4.23695	2.27e-05	0.00011026	LRRC32	2615
ENSG00000160870	386.371	2.86802	0.666913	4.30044	1.7e-05	8.47e-05	CYP3A7	1551
ENSG00000282277	386.371	2.86802	0.666913	4.30044	1.7e-05	8.47e-05	CYP3A51P	1578
ENSG00000282301	386.371	2.86802	0.666913	4.30044	1.7e-05	8.47e-05	CYP3A7-CYP3A51P	100861540
ENSG00000023445	12555.9	2.85869	0.429001	6.6636	2.67e-11	2.87e-10	BIRC3	330
ENSG00000212466	12555.9	2.85869	0.429001	6.6636	2.67e-11	2.87e-10	RNU6-952P	106479987
ENSG00000236345	346.658	2.85754	0.207509	13.7707	3.82e-43	2.67e-41	SCAT8	112935969
ENSG00000135116	1088.19	2.84974	0.187423	15.2048	3.28e-52	3.27e-50	HRK	8739
ENSG00000168394	145.33	2.8474	0.329271	8.6476	5.26e-18	1.02e-16	TAP1	6890
ENSG00000252659	7.58308	-2.09767	0.752896	-2.78614	0.00533405	0.0157286	RNU6-1088P	106480044
ENSG00000272273	33.1496	-2.10076	0.420134	-5.00021	5.73e-07	3.58e-06	IER3-AS1	105379695
ENSG00000255157	17.6556	-2.10155	0.785357	-2.67592	0.00745252	0.0211335	DEFB130C	110806270
ENSG00000256746	72.8363	-2.10671	0.302819	-6.95699	3.48e-12	4.12e-11	MADD-AS1	101928943
ENSG00000260394	103.942	-2.1106	0.37721	-5.5953	2.2e-08	1.67e-07	STUB1-DT	105371184
ENSG00000229091	173.244	-2.11139	0.340409	-6.2025	5.56e-10	5.12e-09	HSPA8P8	100287551
ENSG00000054793	19893.6	-2.11817	0.389204	-5.44232	5.26e-08	3.8e-07	ATP9A	10079
ENSG00000115841	1351.29	-2.12045	0.373156	-5.68246	1.33e-08	1.04e-07	RMDN2	151393
ENSG00000261170	181.159	-2.12217	0.175853	-12.0678	1.56e-33	7.16e-32	LOC107984827	107984827
ENSG00000119608	189.052	-2.12423	0.336353	-6.31549	2.69e-10	2.58e-09	PROX2	283571
ENSG00000264386	12.8418	-2.12473	0.537022	-3.9565	7.61e-05	0.00033784	MIR4513	100616183
ENSG00000229214	13.0649	-2.1296	0.888259	-2.3975	0.0165074	0.0422792	LINC00242	401288
ENSG00000091129	575.202	-2.13245	0.158153	-13.4835	1.96e-41	1.26e-39	NRCAM	4897
ENSG00000115461	267.205	-2.13349	0.152216	-14.0162	1.24e-44	9.26e-43	IGFBP5	3488
ENSG00000201659	6.47407	-2.13821	0.832401	-2.56873	0.0102072	0.0279043	RNU12-2P	26823
ENSG00000231690	12.8428	-2.13842	0.714677	-2.99215	0.00277021	0.00877229	LINC00574	80069
ENSG00000183044	151.663	-2.13898	0.212464	-10.0675	7.69e-24	2.11e-22	ABAT	18
ENSG00000112212	10.735	-2.14077	0.671168	-3.18961	0.00142463	0.00484845	TSPO2	222642
ENSG00000173811	50.2637	-2.14128	0.471823	-4.53832	5.67e-06	3.06e-05	CCDC13-AS1	100874114
ENSG00000108244	9.5136	-2.14275	0.576239	-3.71851	0.0002004	0.00082102	KRT23	25984
ENSG00000154518	52.1362	-2.14481	0.777062	-2.76016	0.00577738	0.0168816	ATP5MC3	518
ENSG00000264017	21.7221	-2.14798	0.436253	-4.9237	8.49e-07	5.18e-06	RN7SL336P	106479346
ENSG00000134532	55.579	-2.15133	0.818583	-2.62812	0.00858591	0.0239917	SOX5	6660
ENSG00000221502	5.84185	-2.15746	0.778216	-2.77231	0.005566	0.0163319	MIR1245A	100302219
ENSG00000241684	15.3392	-2.15869	0.688629	-3.13477	0.00171988	0.0057428	ADAMTS9-AS2	100507098
ENSG00000169750	886.314	-2.15999	0.156379	-13.8126	2.14e-43	1.51e-41	RAC3	5881
ENSG00000143512	46.1754	-2.16102	0.375694	-5.75206	8.82e-09	7.06e-08	HHIPL2	79802
ENSG00000260660	53.0128	-2.16224	0.471064	-4.59012	4.43e-06	2.43e-05	LOC105376731	105376731
ENSG00000264607	6.56824	-2.16571	0.750524	-2.8856	0.00390669	0.0119491	MIR3173	100422981
ENSG00000248455	25.7591	-2.16579	0.647149	-3.34667	0.00081788	0.00293946	LINC02217	101929544
ENSG00000119535	57.8434	-2.16868	0.67306	-3.22212	0.00127244	0.00437894	CSF3R	1441
ENSG00000257771	146.642	-2.17053	0.312306	-6.95001	3.65e-12	4.33e-11	LINC02395	101927292
ENSG00000268006	883.404	-2.17083	0.145424	-14.9276	2.18e-50	2.01e-48	PTOV1-AS1	100506033
ENSG00000224354	10.9417	-2.1712	0.66593	-3.2604	0.00111257	0.00388073	MTND2P5	100873176
ENSG00000224977	101.652	-2.1727	0.252131	-8.61732	6.85e-18	1.32e-16	RC3H1-DT	105371620
ENSG00000127578	288.098	-2.17494	0.18767	-11.5892	4.68e-31	1.92e-29	WFIKKN1	117166
ENSG00000197562	288.098	-2.17494	0.18767	-11.5892	4.68e-31	1.92e-29	RAB40C	57799
ENSG00000241874	17.9059	-2.18031	0.670046	-3.25397	0.00113806	0.00396148	TOMM22P6	100287573
ENSG00000255181	6.48798	-2.1937	0.864611	-2.53721	0.0111741	0.030148	CCDC166	100130274
ENSG00000226167	189.467	-2.19688	0.228019	-9.63463	5.71e-22	1.41e-20	AP4B1-AS1	100287722
ENSG00000265092	9.56769	-2.19718	0.662282	-3.31759	0.00090797	0.00322732	MIR4484	100616327
ENSG00000171551	154.592	-2.20454	0.252468	-8.73195	2.5e-18	4.93e-17	ECEL1	9427
ENSG00000182759	716.641	-2.21034	0.204612	-10.8026	3.35e-27	1.13e-25	MAFA	389692
ENSG00000167747	29.0758	-2.21727	0.795653	-2.78673	0.00532426	0.0157056	C19orf48	84798
ENSG00000220988	29.0758	-2.21727	0.795653	-2.78673	0.00532426	0.0157056	SNORD88C	692204
ENSG00000221241	29.0758	-2.21727	0.795653	-2.78673	0.00532426	0.0157056	SNORD88A	692202
ENSG00000221381	29.0758	-2.21727	0.795653	-2.78673	0.00532426	0.0157056	SNORD88B	692203
ENSG00000281491	16.2099	-2.21851	0.604148	-3.67213	0.00024054	0.00096941	DNAJB5-DT	101926900
ENSG00000167800	45.2638	-2.23075	0.404611	-5.51333	3.52e-08	2.6e-07	TBX10	347853
ENSG00000067992	6749.1	-2.24013	0.0824424	-27.172	1.39e-162	9.78e-160	PDK3	5165
ENSG00000152556	10.797	-2.24732	0.647426	-3.47116	0.00051821	0.00194592	PFKM	5213
ENSG00000275770	10.797	-2.24732	0.647426	-3.47116	0.00051821	0.00194592	MIR6505	102466657
ENSG00000231811	13.6909	-2.24834	0.928474	-2.42154	0.015455	0.039918	LOC101927888	101927888
ENSG00000175097	50.3784	-2.25033	0.296694	-7.58469	3.33e-14	4.73e-13	RAG2	5897
ENSG00000259540	16.9269	-2.25193	0.954182	-2.36006	0.0182719	0.0461462	LOC102723335	102723335
ENSG00000177669	20.4416	-2.25452	0.478664	-4.71002	2.48e-06	1.41e-05	MBOAT4	619373
ENSG00000232850	207.834	-2.25546	0.233685	-9.6517	4.83e-22	1.2e-20	PTGES2-AS1	389791
ENSG00000134242	25.8721	-2.25682	0.777801	-2.90154	0.00371333	0.0114252	PTPN22	26191
ENSG00000271236	18.7255	-2.25833	0.58574	-3.85552	0.00011548	0.00049613	SUMO2P15	106480417
ENSG00000275846	40.5554	-2.27548	0.549294	-4.14256	3.43e-05	0.00016246	LOC105374989	105374989
ENSG00000226393	9.77408	-2.27621	0.798971	-2.84892	0.00438677	0.0132397	IFNA20P	3463
ENSG00000122729	449.752	-2.27635	0.284693	-7.99582	1.29e-15	2.05e-14	ACO1	48
ENSG00000242048	23.0853	-2.27638	0.492333	-4.62365	3.77e-06	2.09e-05	LOC644090	644090
ENSG00000236081	4156.44	-2.27989	0.12433	-18.3374	4.16e-75	7.01e-73	ELFN1-AS1	101927125
ENSG00000105610	7.60936	-2.28202	0.939972	-2.42775	0.0151928	0.0393334	KLF1	10661
ENSG00000261404	34.0117	-2.28206	0.476301	-4.79121	1.66e-06	9.68e-06	PSMD7-DT	101928035
ENSG00000137207	18.9863	-2.28552	0.597303	-3.8264	0.00013003	0.00055195	YIPF3	25844
ENSG00000204052	18.9863	-2.28552	0.597303	-3.8264	0.00013003	0.00055195	LRRC73	221424
ENSG00000102053	815.056	-2.28555	0.175914	-12.9924	1.35e-38	7.97e-37	ZC3H12B	340554
ENSG00000176641	1236.92	-2.28569	0.46908	-4.87272	1.1e-06	6.6e-06	RNF152	220441
ENSG00000168060	58.1792	-2.28643	0.397806	-5.7476	9.05e-09	7.24e-08	NAALADL1	10004
ENSG00000127588	87.483	-2.28714	0.292026	-7.83198	4.8e-15	7.35e-14	GNG13	51764
ENSG00000124253	1222.15	-2.2934	0.200283	-11.4508	2.33e-30	9.37e-29	PCK1	5105
ENSG00000188032	87.0244	-2.29525	0.268695	-8.5422	1.32e-17	2.49e-16	C19orf67	646457
ENSG00000206938	11.0885	-2.29711	0.572668	-4.01125	6.04e-05	0.00027369	RNU4-31P	106480546
ENSG00000164051	28.4907	-2.29814	0.803751	-2.85927	0.0042462	0.0128687	CCDC51	79714
ENSG00000153292	48.1113	-2.30089	0.860896	-2.67267	0.0075251	0.0213179	ADGRF1	266977
ENSG00000064835	16.5785	-2.30137	0.762828	-3.0169	0.00255378	0.00816161	POU1F1	5449
ENSG00000206597	913.496	-2.30198	0.147902	-15.5643	1.27e-54	1.34e-52	SNORA57	692158
ENSG00000214756	913.496	-2.30198	0.147902	-15.5643	1.27e-54	1.34e-52	CSKMT	751071
ENSG00000228037	29.8487	-2.30882	0.396729	-5.81965	5.9e-09	4.81e-08	LOC100996583	100996583
ENSG00000158104	5366.12	-2.31217	0.710063	-3.25628	0.00112882	0.0039328	HPD	3242
ENSG00000162599	2013.34	-2.31293	0.716608	-3.2276	0.00124832	0.00430685	NFIA	4774
ENSG00000183307	19.6972	-2.31408	0.699299	-3.30915	0.00093579	0.00331542	TMEM121B	27439
ENSG00000230679	84.9653	-2.3167	0.341059	-6.79266	1.1e-11	1.24e-10	ENO1-AS1	100505975
ENSG00000187736	368.548	-2.32117	0.288222	-8.05341	8.05e-16	1.31e-14	NHEJ1	79840
ENSG00000213901	368.548	-2.32117	0.288222	-8.05341	8.05e-16	1.31e-14	SLC23A3	151295
ENSG00000101331	38.8519	-2.32147	0.510051	-4.55146	5.33e-06	2.89e-05	CCM2L	140706
ENSG00000197540	10.1403	-2.32291	0.860374	-2.69989	0.00693625	0.0198568	GZMM	3004
ENSG00000234327	530.249	-2.3252	0.229433	-10.1345	3.88e-24	1.08e-22	ZNF232-AS1	101928000
ENSG00000250635	52.339	-2.32543	0.347816	-6.6858	2.3e-11	2.48e-10	CXXC5-AS1	111082989
ENSG00000243383	5.4667	-2.32573	0.894916	-2.59883	0.00935427	0.0258308	RN7SL89P	106479256
ENSG00000170608	9.93359	-2.32889	0.92565	-2.51595	0.0118711	0.0317501	FOXA3	3171
ENSG00000179157	21.4847	-2.3296	0.504177	-4.62059	3.83e-06	2.12e-05	RPS2P28	100132673
ENSG00000188133	16.2347	-2.33221	1.00002	-2.33217	0.0196919	0.0492084	TMEM215	401498
ENSG00000255559	323.322	-2.33257	0.137535	-16.9599	1.63e-64	2.27e-62	ZNF252P-AS1	286103
ENSG00000206384	217.622	-2.33379	0.170011	-13.7273	6.97e-43	4.82e-41	COL6A6	131873
ENSG00000223570	7.18954	-2.33424	0.991489	-2.35428	0.0185587	0.0467624	RPL34P7	100127995
ENSG00000159650	9.7158	-2.33804	1.00368	-2.32946	0.0198349	0.049522	UROC1	131669
ENSG00000271045	8.11078	-2.33941	0.910381	-2.5697	0.0101786	0.0278372	LOC106050037	106050037
ENSG00000253603	45.8996	-2.34048	0.400976	-5.83697	5.32e-09	4.36e-08	CERNA3	105375847
ENSG00000233791	98.5109	-2.35556	0.330186	-7.13403	9.75e-13	1.21e-11	BTG2-DT	730227
ENSG00000233718	25.0856	-2.35573	0.853923	-2.75871	0.00580293	0.0169475	MYCNOS	10408
ENSG00000163106	8.42945	-2.35675	0.994282	-2.3703	0.0177735	0.0450664	HPGDS	27306
ENSG00000207550	5.77187	-2.3599	0.795489	-2.9666	0.0030111	0.00945661	MIR99B	407056
ENSG00000240270	29.5734	-2.36351	0.527202	-4.48313	7.36e-06	3.9e-05	RPL12P37	100129801
ENSG00000243954	6.01636	-2.36793	0.980462	-2.41511	0.0157304	0.0405333	RN7SL743P	106479492
ENSG00000223549	32.8145	-2.37661	0.432739	-5.49201	3.97e-08	2.92e-07	MTND5P28	100505755
ENSG00000249715	106.66	-2.37786	0.332894	-7.14297	9.13e-13	1.14e-11	FER1L5	90342
ENSG00000112343	172.388	-2.37878	0.366017	-6.49911	8.08e-11	8.2e-10	TRIM38	10475
ENSG00000229780	61.0743	-2.38182	0.357629	-6.66002	2.74e-11	2.94e-10	UBE2Q1-AS1	100874097
ENSG00000069018	29.0506	-2.38241	0.718884	-3.31404	0.00091959	0.00326449	TRPC7	57113
ENSG00000265692	230.158	-2.38646	0.169808	-14.0539	7.29e-45	5.53e-43	LINC01970	101929511
ENSG00000157214	10.685	-2.38913	0.915284	-2.61026	0.00904739	0.0250678	STEAP2	261729
ENSG00000268866	9.90158	-2.39331	0.690022	-3.46845	0.00052348	0.00196235	LOC100419847	100419847
ENSG00000199150	8.47724	-2.39748	0.642201	-3.73322	0.00018905	0.00077815	MIRLET7G	406890
ENSG00000178921	5217.01	-2.4037	0.516954	-4.64974	3.32e-06	1.86e-05	PFAS	5198
ENSG00000201184	5.15698	-2.40479	0.968351	-2.48338	0.0130141	0.034419	RNU4-68P	106479589
ENSG00000215088	16.2304	-2.40668	0.643397	-3.74058	0.00018359	0.00075791	RPS5P3	54022
ENSG00000185291	251.176	-2.40821	0.183337	-13.1354	2.06e-39	1.25e-37	IL3RA	3563
ENSG00000221763	14.3144	-2.4137	0.54916	-4.39526	1.11e-05	5.68e-05	MIR1289-1	100302125
ENSG00000145920	29.5819	-2.41498	0.71987	-3.35475	0.00079437	0.00286569	CPLX2	10814
ENSG00000198829	12.2412	-2.42611	1.04003	-2.33273	0.0196624	0.0491442	SUCNR1	56670
ENSG00000063978	32.449	-2.42845	0.413004	-5.87997	4.1e-09	3.42e-08	RNF4	6047
ENSG00000125386	32.449	-2.42845	0.413004	-5.87997	4.1e-09	3.42e-08	FAM193A	8603
ENSG00000206113	32.449	-2.42845	0.413004	-5.87997	4.1e-09	3.42e-08	CFAP99	402160
ENSG00000170374	169.753	-2.42898	0.267789	-9.0705	1.18e-19	2.54e-18	SP7	121340
ENSG00000102096	945.727	-2.4316	0.180591	-13.4647	2.52e-41	1.61e-39	PIM2	11040
ENSG00000104901	27.2757	-2.44046	0.581326	-4.19809	2.69e-05	0.00012952	DKKL1	27120
ENSG00000154342	19.8887	-2.45067	0.99811	-2.45531	0.0140762	0.0368053	WNT3A	89780
ENSG00000183921	28.09	-2.45095	0.468046	-5.23656	1.64e-07	1.11e-06	SDR42E2	100288072
ENSG00000255314	9.67645	-2.45314	0.690895	-3.55066	0.00038426	0.0014825	LOC101928894	101928894
ENSG00000198331	113.925	-2.46124	0.219964	-11.1893	4.6e-29	1.71e-27	HYLS1	219844
ENSG00000283982	57.1643	-2.46482	0.810112	-3.04256	0.00234572	0.0075847	LOC101929563	101929563
ENSG00000048462	38.2828	-2.4796	0.742771	-3.33832	0.00084288	0.00301964	TNFRSF17	608
ENSG00000229022	8.16648	-2.4804	0.84798	-2.92507	0.00344378	0.0106792	RPL6P3	391181
ENSG00000266290	17.5955	-2.48113	1.0291	-2.41097	0.0159103	0.0409245	DYNLL2-DT	101927666
ENSG00000234006	7.07498	-2.48129	0.71426	-3.47393	0.00051289	0.00192907	DDX39B-AS1	106478957
ENSG00000173250	113.171	-2.48318	0.471477	-5.26681	1.39e-07	9.5e-07	GPR151	134391
ENSG00000182896	13.9858	-2.48542	0.571699	-4.34743	1.38e-05	6.97e-05	TMEM95	339168
ENSG00000265160	6.23487	-2.48843	0.824313	-3.01879	0.00253787	0.00812197	MIR5003	100847029
ENSG00000145198	7.01093	-2.48865	0.797688	-3.11983	0.00180954	0.00601494	VWA5B2	90113
ENSG00000221120	7.01093	-2.48865	0.797688	-3.11983	0.00180954	0.00601494	MIR1224	100187716
ENSG00000256690	133.858	-2.48911	0.236895	-10.5072	8e-26	2.51e-24	STX5-DT	105369332
ENSG00000262154	57.9922	-2.49743	0.358877	-6.95901	3.43e-12	4.07e-11	EIF1P4	100130566
ENSG00000184702	46.2739	-2.49964	0.605151	-4.1306	3.62e-05	0.00017014	SEPTIN5	5413
ENSG00000260257	277.016	-2.50216	0.199882	-12.5182	5.94e-36	3.07e-34	LOC119746555	119746555
ENSG00000253551	15.615	-2.50385	0.998448	-2.50774	0.0121505	0.032394	LOC101929341	101929341
ENSG00000121377	4.49957	-2.51928	1.08199	-2.32838	0.0198917	0.0496448	TAS2R7	50837
ENSG00000197406	122.434	-2.52268	0.333147	-7.57226	3.67e-14	5.2e-13	DIO3	1735
ENSG00000229380	19.7092	-2.52678	0.704642	-3.58591	0.00033591	0.00131437	PRKAR1B-AS2	101927000
ENSG00000183828	4.30711	-2.52916	1.0683	-2.36745	0.0179109	0.0453508	NUDT14	256281
ENSG00000184916	4.30711	-2.52916	1.0683	-2.36745	0.0179109	0.0453508	JAG2	3714
ENSG00000273778	4.30711	-2.52916	1.0683	-2.36745	0.0179109	0.0453508	MIR6765	102465458
ENSG00000269959	836.713	-2.53051	0.194885	-12.9846	1.5e-38	8.76e-37	SPACA6-AS1	102238594
ENSG00000175513	8.58921	-2.53114	0.896511	-2.82332	0.00475292	0.0142064	TSGA10IP	254187
ENSG00000172238	15.9605	-2.53191	1.0808	-2.34263	0.0191484	0.0480209	ATOH1	474
ENSG00000271860	11.7331	-2.53543	0.669457	-3.78729	0.0001523	0.00063802	LOC101927314	101927314
ENSG00000172987	48.83	-2.53664	0.358927	-7.0673	1.58e-12	1.93e-11	HPSE2	60495
ENSG00000131459	679.898	-2.54209	0.189441	-13.4189	4.69e-41	2.97e-39	GFPT2	9945
ENSG00000050767	5.70891	-2.54499	0.998913	-2.54776	0.0108416	0.0293857	COL23A1	91522
ENSG00000222282	10.3544	-2.54728	0.747756	-3.40657	0.00065784	0.0024161	RNU6-584P	106479825
ENSG00000162944	217.834	-2.54888	0.26721	-9.53885	1.44e-21	3.5e-20	RFTN2	130132
ENSG00000165694	27.8668	-2.55426	0.686984	-3.71808	0.00020074	0.00082233	FRMD7	90167
ENSG00000202429	8.41678	-2.55444	0.770532	-3.31517	0.00091588	0.00325336	RNU4-48P	106479580
ENSG00000187733	5.68534	-2.56333	1.00961	-2.53893	0.0111191	0.0300221	AMY1C	278
ENSG00000238228	84.0313	-2.5678	0.364478	-7.04515	1.85e-12	2.25e-11	OR7E7P	392752
ENSG00000204659	41.2392	-2.56864	0.528254	-4.86251	1.16e-06	6.93e-06	CBY3	646019
ENSG00000164530	216.567	-2.57427	0.200451	-12.8424	9.48e-38	5.4e-36	PI16	221476
ENSG00000222522	10.1543	-2.57707	0.745098	-3.4587	0.00054279	0.0020268	RNU6-519P	106479796
ENSG00000185303	13.2486	-2.57931	0.987362	-2.61232	0.00899293	0.0249485	SFTPA2	729238
ENSG00000179580	54.0065	-2.5813	0.335539	-7.69299	1.44e-14	2.1e-13	RNF151	146310
ENSG00000261335	170.133	-2.58482	0.235627	-10.97	5.33e-28	1.87e-26	LOC105274304	105274304
ENSG00000220522	4.89664	-2.59627	1.05988	-2.44959	0.0143019	0.0373162	LOC100287856	100287856
ENSG00000287885	12.0876	-2.59646	0.923289	-2.81218	0.00492066	0.01465	LOC105371272	105371272
ENSG00000121853	8.50692	-2.60004	1.00213	-2.59451	0.00947247	0.0261096	GHSR	2693
ENSG00000174562	4.80423	-2.61311	1.00139	-2.60947	0.00906819	0.0251166	KLK15	55554
ENSG00000283567	27.9137	-2.61542	0.699953	-3.73656	0.00018655	0.00076844	C19orf85	111064650
ENSG00000273540	7.77119	-2.62593	1.08838	-2.41269	0.0158352	0.0407553	AGBL1	123624
ENSG00000285412	4.983	-2.6342	0.971367	-2.71185	0.00669097	0.0192231	LOC101928168	101928168
ENSG00000270930	35.7783	-2.63576	0.607496	-4.33873	1.43e-05	7.23e-05	GRAMD4P8	100631247
ENSG00000254064	54.6064	-2.64164	0.333809	-7.9136	2.5e-15	3.9e-14	PIWIL2-DT	100507071
ENSG00000230321	5.67054	-2.64672	0.936772	-2.82537	0.00472268	0.01413	MTCO2P27	107075291
ENSG00000187997	23.4977	-2.64731	0.737718	-3.58852	0.00033256	0.00130244	C17orf99	100141515
ENSG00000125997	37.3795	-2.64854	0.694484	-3.81369	0.00013691	0.00057865	BPIFB9P	402016
ENSG00000009694	79.3152	-2.65808	0.357298	-7.43938	1.01e-13	1.38e-12	TENM1	10178
ENSG00000135472	127.783	-2.67718	0.379202	-7.06005	1.66e-12	2.03e-11	FAIM2	23017
ENSG00000178460	202.216	-2.68078	0.333348	-8.042	8.84e-16	1.43e-14	MCMDC2	157777
ENSG00000130528	28.9919	-2.68293	0.468373	-5.72819	1.02e-08	8.07e-08	HRC	3270
ENSG00000182586	6.19841	-2.68411	1.10327	-2.43286	0.0149802	0.03888	LINC00334	114042
ENSG00000087495	28.5594	-2.69425	0.65216	-4.13127	3.61e-05	0.00016969	PHACTR3	116154
ENSG00000261432	11.5056	-2.69587	0.879284	-3.06598	0.00216955	0.00707547	LINC01613	106146149
ENSG00000105679	53.9852	-2.69982	0.350074	-7.71216	1.24e-14	1.82e-13	GAPDHS	26330
ENSG00000235629	10.2997	-2.70059	0.854839	-3.15918	0.00158214	0.00532014	LINC02922	121832816
ENSG00000152270	2165.11	-2.70127	0.562156	-4.80519	1.55e-06	9.07e-06	PDE3B	5140
ENSG00000253039	5.00152	-2.7055	1.06027	-2.55172	0.0107192	0.0290886	RNA5SP47	100873286
ENSG00000260804	1320.45	-2.70841	0.155475	-17.4202	5.8e-68	8.45e-66	LINC01963	150967
ENSG00000266909	6.84681	-2.71209	0.893373	-3.03579	0.00239908	0.00772816	SLC25A6P4	100422690
ENSG00000126950	34.4756	-2.71676	0.709606	-3.82855	0.0001289	0.00054793	TMEM35A	59353
ENSG00000126895	37.9338	-2.72392	0.494707	-5.50613	3.67e-08	2.71e-07	AVPR2	554
ENSG00000132698	10.1254	-2.73027	0.760866	-3.58837	0.00033275	0.00130291	RAB25	57111
ENSG00000105379	7.33752	-2.73522	0.965273	-2.83362	0.00460234	0.013814	ETFB	2109
ENSG00000160318	7.33752	-2.73522	0.965273	-2.83362	0.00460234	0.013814	CLDND2	125875
ENSG00000226501	25.3017	-2.74856	0.626767	-4.3853	1.16e-05	5.92e-05	USF1P1	100151645
ENSG00000101251	14.736	-2.76116	0.689402	-4.00515	6.2e-05	0.00028004	SEL1L2	80343
ENSG00000094755	15.1148	-2.76369	0.820038	-3.3702	0.00075114	0.0027247	GABRP	2568
ENSG00000237179	30.5527	-2.7662	0.466643	-5.92788	3.07e-09	2.6e-08	LINC01797	101927577
ENSG00000232528	4.25696	-2.7683	1.0331	-2.67961	0.00737073	0.0209242	LOC100289473	100289473
ENSG00000166855	1241.12	-2.76885	0.505666	-5.47566	4.36e-08	3.18e-07	CLPX	10845
ENSG00000019505	349.078	-2.7707	0.213005	-13.0077	1.11e-38	6.55e-37	SYT13	57586
ENSG00000137474	325.324	-2.77119	0.383324	-7.22937	4.85e-13	6.24e-12	MYO7A	4647
ENSG00000200095	4.12485	-2.7739	1.05356	-2.63288	0.00846641	0.0236914	RNU6-181P	106480559
ENSG00000260941	48.0199	-2.7926	0.54144	-5.15772	2.5e-07	1.65e-06	LINC00622	644242
ENSG00000125965	22.7925	-2.79923	0.582356	-4.80674	1.53e-06	9.01e-06	GDF5	8200
ENSG00000207948	4.35641	-2.79973	1.0893	-2.57021	0.0101638	0.0278031	MIR328	442901
ENSG00000013364	22.4897	-2.80486	0.735383	-3.81415	0.00013665	0.00057763	MVP	9961
ENSG00000103495	22.4897	-2.80486	0.735383	-3.81415	0.00013665	0.00057763	MAZ	4150
ENSG00000167371	22.4897	-2.80486	0.735383	-3.81415	0.00013665	0.00057763	PRRT2	112476
ENSG00000280789	22.4897	-2.80486	0.735383	-3.81415	0.00013665	0.00057763	PAGR1	79447
ENSG00000125998	33.0075	-2.8275	0.939115	-3.01082	0.00260547	0.00831331	FAM83C	128876
ENSG00000188263	342.999	-2.83836	0.203737	-13.9315	4.08e-44	2.99e-42	IL17REL	400935
ENSG00000240534	18.0377	-2.84444	1.12282	-2.5333	0.0112996	0.0304447	RPL34P17	100271001
ENSG00000107105	157.711	-2.84757	0.389093	-7.31847	2.51e-13	3.3e-12	ELAVL2	1993
ENSG00000226428	6.76449	-2.85357	1.2227	-2.33384	0.0196043	0.0490239	RPL15P13	100131338
ENSG00000241525	19.3854	-2.85826	0.710635	-4.02213	5.77e-05	0.00026229	LOC105371430	105371430
ENSG00000286352	14.8863	-2.86454	0.710549	-4.03144	5.54e-05	0.00025281	LOC105376975	105376975
ENSG00000136931	4.52627	-2.86546	1.19631	-2.39525	0.0166091	0.0425083	NR5A1	2516
ENSG00000253513	35.0499	-2.86557	0.594856	-4.81725	1.46e-06	8.58e-06	SQLE-DT	105375744
ENSG00000178772	13.9295	-2.87104	0.876103	-3.27705	0.00104896	0.00367669	CPN2	1370
ENSG00000187955	266.243	-2.87453	0.283558	-10.1374	3.77e-24	1.05e-22	COL14A1	7373
ENSG00000175202	24.5281	-2.87868	0.625851	-4.59962	4.23e-06	2.33e-05	HIGD2B	123346
ENSG00000132305	1281.24	-2.90142	0.839866	-3.45462	0.00055106	0.00205593	IMMT	10989
ENSG00000172349	180.831	-2.9028	0.332279	-8.73604	2.41e-18	4.76e-17	IL16	3603
ENSG00000253943	4.57352	-2.90671	0.98089	-2.96334	0.00304318	0.00954444	KRT18P37	392214
ENSG00000250490	7.28874	-2.91347	1.16887	-2.49255	0.0126828	0.0336288	LINC02145	401172
ENSG00000253176	6.74162	-2.91813	0.969963	-3.0085	0.00262543	0.00836819	LOC100130612	100130612
ENSG00000152092	18.04	-2.92495	0.862789	-3.39011	0.00069865	0.00255124	ASTN1	460
ENSG00000224414	8.28859	-2.93239	1.00209	-2.92627	0.00343055	0.0106432	LOC100533848	100533848
ENSG00000239333	10.6602	-2.93529	0.980568	-2.99346	0.00275835	0.00874022	RN7SL658P	106480524
ENSG00000141371	3.49733	-2.93596	1.13083	-2.59629	0.00942359	0.0259965	C17orf64	124773
ENSG00000207023	13.9861	-2.94681	0.59356	-4.96463	6.88e-07	4.25e-06	RNU6-975P	106479997
ENSG00000128242	7.47752	-2.95	1.16423	-2.53386	0.0112815	0.0304001	GAL3ST1	9514
ENSG00000137486	662.193	-2.95722	0.326505	-9.05718	1.34e-19	2.86e-18	ARRB1	408
ENSG00000080293	27.5045	-2.96233	0.598156	-4.95244	7.33e-07	4.51e-06	SCTR	6344
ENSG00000261803	64.4109	-2.96555	0.657239	-4.51214	6.42e-06	3.43e-05	LINC02140	100996345
ENSG00000135324	117.683	-2.96867	0.273324	-10.8614	1.76e-27	6e-26	MRAP2	112609
ENSG00000104112	30.7525	-2.9687	0.449968	-6.59757	4.18e-11	4.39e-10	SCG3	29106
ENSG00000224164	84.1687	-2.97076	0.719842	-4.12696	3.68e-05	0.00017272	LINC02828	105374978
ENSG00000102239	29.4637	-2.97076	0.518913	-5.72498	1.03e-08	8.21e-08	BRS3	680
ENSG00000272412	27.3129	-2.97245	0.474869	-6.25951	3.86e-10	3.62e-09	RN7SL778P	106479504
ENSG00000200495	3.50012	-2.99596	1.1789	-2.54132	0.0110435	0.0298427	RNU6-1205P	106480093
ENSG00000060718	6.45783	-3.01376	1.16806	-2.58014	0.00987606	0.0271075	COL11A1	1301
ENSG00000251819	3.73705	-3.03015	1.22424	-2.47513	0.0133187	0.0351091	RNU6-322P	107105253
ENSG00000214097	14.2287	-3.03179	0.855699	-3.54306	0.00039551	0.00152365	SMCO1	255798
ENSG00000236502	7.16957	-3.03372	0.978311	-3.10098	0.0019288	0.00636412	SIX3-AS1	100506108
ENSG00000182676	101.403	-3.04301	0.231703	-13.1332	2.12e-39	1.28e-37	PPP1R27	116729
ENSG00000226510	6.59833	-3.04512	1.20564	-2.52574	0.0115455	0.0310014	UPK1A-AS1	100862728
ENSG00000086991	5.139	-3.06634	1.30879	-2.34288	0.0191353	0.0479979	NOX4	50507
ENSG00000197943	7.69587	-3.08592	1.05698	-2.91956	0.00350525	0.0108425	PLCG2	5336
ENSG00000174807	9.33196	-3.09987	0.930512	-3.33136	0.00086424	0.00309055	CD248	57124
ENSG00000204889	3.94554	-3.1176	1.28724	-2.42193	0.0154382	0.0398874	KRT40	125115
ENSG00000271986	21.3852	-3.14825	0.79781	-3.94611	7.94e-05	0.00035164	RN7SL827P	106481762
ENSG00000165124	1588.04	-3.15489	0.743086	-4.24565	2.18e-05	0.00010639	SVEP1	79987
ENSG00000206658	1588.04	-3.15489	0.743086	-4.24565	2.18e-05	0.00010639	RNU6-1039P	106481931
ENSG00000169862	30.9746	-3.1553	0.890795	-3.54212	0.00039693	0.00152852	CTNND2	1501
ENSG00000167580	81.2658	-3.16796	0.455879	-6.94914	3.68e-12	4.35e-11	AQP2	359
ENSG00000233701	4.14676	-3.19064	1.2906	-2.47222	0.0134277	0.035361	PRR23C	389152
ENSG00000131127	2.77661	-3.1972	1.34271	-2.38116	0.017258	0.0439178	ZNF141	7700
ENSG00000013810	3157.12	-3.19827	0.733562	-4.35992	1.3e-05	6.61e-05	TACC3	10460
ENSG00000122882	19.277	-3.20666	0.880137	-3.64336	0.0002691	0.00107452	ECD	11319
ENSG00000221164	19.277	-3.20666	0.880137	-3.64336	0.0002691	0.00107452	SNORA11F	109617000
ENSG00000255647	207.091	-3.20971	0.291411	-11.0144	3.26e-28	1.16e-26	LOC731157	731157
ENSG00000007908	5.89295	-3.23483	1.23173	-2.62625	0.00863313	0.0241065	SELE	6401
ENSG00000108691	418.701	-3.23838	0.313022	-10.3455	4.38e-25	1.31e-23	CCL2	6347
ENSG00000274209	4.28736	-3.24686	1.39054	-2.33496	0.0195454	0.0488889	ANTXRL	195977
ENSG00000111181	2278.07	-3.26298	0.562489	-5.80096	6.59e-09	5.34e-08	SLC6A12	6539
ENSG00000275663	11.6294	-3.26605	0.897974	-3.63713	0.0002757	0.00109797	H4C7	8369
ENSG00000168484	13.9887	-3.27011	0.935572	-3.49531	0.00047351	0.00179586	SFTPC	6440
ENSG00000107147	8.86014	-3.27374	1.14975	-2.84736	0.00440841	0.0132975	KCNT1	57582
ENSG00000176302	4.53487	-3.27488	1.39151	-2.35347	0.0185993	0.0468437	FOXR1	283150
ENSG00000010327	34.7514	-3.29825	0.500194	-6.59394	4.28e-11	4.5e-10	STAB1	23166
ENSG00000236866	9.36248	-3.3077	1.15376	-2.8669	0.00414519	0.0125964	TENT5C-DT	100996263
ENSG00000197353	7.78014	-3.30938	1.22242	-2.70724	0.00678448	0.0194619	LYPD2	137797
ENSG00000205899	4.49659	-3.3128	1.17623	-2.81646	0.00485562	0.0144838	BHLHA9	727857
ENSG00000185668	68.7188	-3.34788	0.392499	-8.52966	1.47e-17	2.77e-16	POU3F1	5453
ENSG00000160352	13.9174	-3.3627	0.850684	-3.95294	7.72e-05	0.00034241	ZNF714	148206
ENSG00000233729	83.9225	-3.3678	0.85741	-3.92788	8.57e-05	0.00037774	NCKAP5-AS1	101928185
ENSG00000284516	7.14894	-3.37602	1.03628	-3.25782	0.00112272	0.00391363	VAMP9P	105377307
ENSG00000231666	6.32001	-3.39104	1.26773	-2.6749	0.00747519	0.0211932	LINC01704	646268
ENSG00000157087	38.6981	-3.39158	0.78864	-4.30054	1.7e-05	8.47e-05	ATP2B2	491
ENSG00000240311	4.6997	-3.39476	1.21087	-2.80356	0.00505412	0.0149884	RPL18P12	390671
ENSG00000204472	3.16022	-3.3987	1.35407	-2.51	0.0120732	0.0322271	AIF1	199
ENSG00000164287	4.86287	-3.40587	1.22426	-2.78199	0.00540262	0.0159117	CDC20B	166979
ENSG00000251856	4.86287	-3.40587	1.22426	-2.78199	0.00540262	0.0159117	MIR449C	100313923
ENSG00000175766	29.4656	-3.42343	0.702358	-4.8742	1.09e-06	6.56e-06	EIF4E1B	253314
ENSG00000231812	4.94168	-3.429	1.28546	-2.66752	0.00764133	0.0216162	SNRPCP9	100310853
ENSG00000010379	193.794	-3.44312	0.629717	-5.46773	4.56e-08	3.32e-07	SLC6A13	6540
ENSG00000232393	3.0925	-3.44403	1.41764	-2.42941	0.0151233	0.039192	RPL5P6	646784
ENSG00000167967	93.8867	-3.48895	0.435599	-8.00955	1.15e-15	1.84e-14	E4F1	1877
ENSG00000167968	93.8867	-3.48895	0.435599	-8.00955	1.15e-15	1.84e-14	DNASE1L2	1775
ENSG00000274098	4.77059	-3.49462	1.15075	-3.03682	0.0023909	0.0077143	RN7SL787P	106479507
ENSG00000188779	4.64111	-3.501	1.30323	-2.68639	0.00722282	0.0205458	SKOR1	390598
ENSG00000184857	360.024	-3.50507	1.34126	-2.61327	0.00896796	0.0248985	TMEM186	25880
ENSG00000202242	5.05109	-3.50762	1.10986	-3.16041	0.00157547	0.00530148	RNU6-1276P	106481583
ENSG00000213669	12.9948	-3.52128	0.79178	-4.44729	8.7e-06	4.56e-05	RPL21P86	100271190
ENSG00000076344	12.5198	-3.52494	1.09349	-3.22357	0.00126604	0.0043611	RGS11	8786
ENSG00000238777	1.99612	-3.52683	1.51195	-2.33263	0.0196674	0.0491536	RNU7-141P	106480822
ENSG00000199051	2.02694	-3.54626	1.40685	-2.52071	0.0117119	0.0313711	MIR361	494323
ENSG00000171357	6.96486	-3.55487	1.23058	-2.88878	0.00386739	0.0118354	LURAP1	541468
ENSG00000186235	8.66693	-3.55645	0.923001	-3.85313	0.00011662	0.00050067	LINC02610	151174
ENSG00000182162	7.05112	-3.56675	1.23573	-2.88634	0.0038975	0.0119229	P2RY8	286530
ENSG00000284662	2.0616	-3.56713	1.43582	-2.48438	0.0129777	0.0343296	OR4F16	81399
ENSG00000166869	4.9737	-3.57156	1.11138	-3.21363	0.0013107	0.00449568	CHP2	63928
ENSG00000231009	3.50778	-3.57207	1.35115	-2.64373	0.00819991	0.0230189	CUBNP1	728064
ENSG00000147443	9.84983	-3.6032	1.01708	-3.54271	0.00039604	0.00152539	DOK2	9046
ENSG00000240935	3.67406	-3.64295	1.26973	-2.86907	0.00411677	0.0125207	PLGLA	285189
ENSG00000258385	9.3059	-3.65402	1.30444	-2.80122	0.00509092	0.0150919	LOC100533628	100533628
ENSG00000104897	203.768	-3.65545	0.780202	-4.68526	2.8e-06	1.58e-05	SF3A2	8175
ENSG00000104899	203.768	-3.65545	0.780202	-4.68526	2.8e-06	1.58e-05	AMH	268
ENSG00000284272	203.768	-3.65545	0.780202	-4.68526	2.8e-06	1.58e-05	MIR4321	100423031
ENSG00000273940	2.17146	-3.66059	1.53948	-2.37781	0.0174158	0.0442765	RN7SL722P	106479486
ENSG00000230319	17.2458	-3.68411	1.16497	-3.16239	0.00156479	0.00526945	TTLL1-AS1	100506679
ENSG00000260220	11.4132	-3.68448	1.03154	-3.57182	0.00035451	0.00138044	CCDC187	399693
ENSG00000167741	28.8291	-3.70035	0.760335	-4.86674	1.13e-06	6.8e-06	GGT6	124975
ENSG00000234572	5.84604	-3.72876	1.24513	-2.99466	0.00274749	0.00870792	LINC01800	101927438
ENSG00000207943	2.30779	-3.73403	1.44305	-2.58759	0.00966512	0.0265792	MIR634	693219
ENSG00000100201	6801.12	-3.74092	1.19282	-3.13621	0.00171148	0.00571844	DDX17	10521
ENSG00000206917	3.7741	-3.74268	1.27876	-2.9268	0.00342474	0.0106277	RNU1-52P	106480164
ENSG00000126233	57.4335	-3.74481	0.908089	-4.12384	3.73e-05	0.00017474	SLURP1	57152
ENSG00000180044	59.6554	-3.74763	0.370898	-10.1042	5.29e-24	1.47e-22	C3orf80	401097
ENSG00000225180	13.4267	-3.74781	0.738136	-5.0774	3.83e-07	2.45e-06	PVALEF	388428
ENSG00000284733	2.35217	-3.77501	1.3793	-2.73691	0.00620194	0.0179715	OR4F29	729759
ENSG00000264271	2.36924	-3.78298	1.59113	-2.37754	0.0174287	0.0443064	RN7SL488P	106479401
ENSG00000186628	324.861	-3.78754	0.400242	-9.46312	2.99e-21	7.11e-20	FSD2	123722
ENSG00000108001	14.6991	-3.79549	1.00284	-3.78475	0.00015386	0.00064429	EBF3	253738
ENSG00000247213	7.70077	-3.81841	1.03238	-3.69864	0.00021676	0.00088088	LINC01498	102723562
ENSG00000166342	51.1506	-3.83771	0.930371	-4.12492	3.71e-05	0.000174	NETO1	81832
ENSG00000166233	303.395	-3.84499	0.671885	-5.72269	1.05e-08	8.31e-08	ARIH1	25820
ENSG00000283798	303.395	-3.84499	0.671885	-5.72269	1.05e-08	8.31e-08	MIR630	693215
ENSG00000243069	6.06652	-3.84916	1.13201	-3.40028	0.00067317	0.00246619	ARHGEF26-AS1	100507524
ENSG00000221598	6.10595	-3.85231	1.01545	-3.79368	0.00014843	0.00062306	MIR1249	100302149
ENSG00000260224	8.67483	-3.85729	1.16113	-3.322	0.00089375	0.00318279	UBL5P4	106480800
ENSG00000218490	18.5825	-3.89362	0.750006	-5.19145	2.09e-07	1.4e-06	FCF1P10	106479046
ENSG00000276562	2.55186	-3.90059	1.41572	-2.75519	0.00586576	0.0171005	RN7SL565P	106481076
ENSG00000126391	740.983	-3.91144	0.597691	-6.54425	5.98e-11	6.18e-10	FRMD8	83786
ENSG00000245532	740.983	-3.91144	0.597691	-6.54425	5.98e-11	6.18e-10	NEAT1	283131
ENSG00000283791	740.983	-3.91144	0.597691	-6.54425	5.98e-11	6.18e-10	MIR612	693197
ENSG00000182631	1.51201	-3.9218	1.64491	-2.3842	0.0171164	0.0436166	RXFP3	51289
ENSG00000138741	11.0379	-3.92475	1.0303	-3.80933	0.00013934	0.00058762	TRPC3	7222
ENSG00000250037	17.2435	-3.93102	0.639925	-6.14295	8.1e-10	7.31e-09	LOC100419318	100419318
ENSG00000143452	6.85583	-3.95268	1.13228	-3.49092	0.00048137	0.00182215	HORMAD1	84072
ENSG00000143595	4.52042	-3.97032	1.30489	-3.04266	0.002345	0.00758299	AQP10	89872
ENSG00000234450	4.59762	-3.98328	1.38456	-2.87694	0.00401558	0.0122527	RPL26P23	100129517
ENSG00000256577	96.7894	-3.98499	0.796029	-5.00608	5.55e-07	3.48e-06	SLC6A12-AS1	101929384
ENSG00000231256	18.5284	-3.98572	0.878272	-4.53815	5.68e-06	3.06e-05	CFAP97D1	284067
ENSG00000255151	1.57528	-3.98845	1.61584	-2.46834	0.0135742	0.0356727	GLYATL1B	100287520
ENSG00000132972	4.41531	-3.99212	1.27514	-3.13072	0.00174379	0.00581555	RNF17	56163
ENSG00000199158	1.6169	-4.02063	1.62674	-2.47158	0.0134517	0.0354115	MIR96	407053
ENSG00000267128	7.04529	-4.02685	1.09929	-3.66314	0.00024914	0.00100151	RNF157-AS1	100507218
ENSG00000222259	11.9079	-4.02843	0.934529	-4.31065	1.63e-05	8.13e-05	RN7SKP114	106480868
ENSG00000182521	1.63502	-4.04819	1.73668	-2.33099	0.0197539	0.0493415	TBPL2	387332
ENSG00000162006	105.826	-4.04867	1.46444	-2.76465	0.00569845	0.0166794	MSLNL	401827
ENSG00000250156	2.85149	-4.05048	1.3653	-2.96672	0.0030099	0.00945363	LINC02060	102546226
ENSG00000227195	801.634	-4.05685	1.23425	-3.28689	0.00101302	0.0035637	MIR663AHG	284801
ENSG00000284419	801.634	-4.05685	1.23425	-3.28689	0.00101302	0.0035637	MIR663A	724033
ENSG00000288531	7.21346	-4.062	1.36039	-2.98592	0.00282731	0.00893571	LOC107984850	107984850
ENSG00000275816	1.65278	-4.06339	1.58966	-2.55613	0.0105843	0.0287774	MIR6500	102466656
ENSG00000256533	86.2492	-4.10698	0.417863	-9.82853	8.49e-23	2.19e-21	LOC100422382	100422382
ENSG00000265272	7.01173	-4.11557	1.20862	-3.40519	0.00066118	0.00242678	RN7SL693P	106479477
ENSG00000246394	4.98807	-4.11612	1.28455	-3.20434	0.00135374	0.00463241	ZNF84-DT	101928597
ENSG00000200366	1.73556	-4.12171	1.57029	-2.6248	0.00866997	0.0241912	RNU6-511P	106479793
ENSG00000253542	5.17588	-4.15806	1.68561	-2.46679	0.0136329	0.035808	SDR16C6P	442388
ENSG00000235214	15.5573	-4.16153	0.797095	-5.22086	1.78e-07	1.2e-06	FAM83C-AS1	140846
ENSG00000264814	1.7752	-4.16425	1.67787	-2.48187	0.0130696	0.0345544	MIR1273C	100422821
ENSG00000237361	7.82346	-4.1841	1.10756	-3.77777	0.00015824	0.00066119	TUSC8	400128
ENSG00000237928	1.81307	-4.19021	1.55274	-2.6986	0.00696325	0.019924	NFIA-AS2	100996570
ENSG00000225922	1.81636	-4.19234	1.69894	-2.46762	0.0136014	0.0357347	RPL21P92	100130400
ENSG00000236483	21.1333	-4.19632	1.00754	-4.16493	3.11e-05	0.0001483	MTND2P40	107075280
ENSG00000229102	1.83693	-4.20592	1.55893	-2.69795	0.00697684	0.0199542	PIK3CA-DT	101928739
ENSG00000243711	3.12257	-4.21074	1.61779	-2.60278	0.0092472	0.0255549	RPL21P116	100271444
ENSG00000115085	19.5357	-4.21384	1.0781	-3.90859	9.28e-05	0.00040628	ZAP70	7535
ENSG00000170419	24.1855	-4.23191	0.776798	-5.44789	5.1e-08	3.69e-07	VSTM2A	222008
ENSG00000018236	3.42931	-4.33334	1.33297	-3.25089	0.00115044	0.00399821	CNTN1	1272
ENSG00000110680	1.99491	-4.33351	1.48504	-2.91811	0.00352156	0.0108862	CALCA	796
ENSG00000239648	13.4146	-4.34972	1.08386	-4.01317	5.99e-05	0.00027154	MTND1P3	100288984
ENSG00000223446	19.5557	-4.40855	0.905808	-4.86699	1.13e-06	6.79e-06	LOC101927993	101927993
ENSG00000189030	6.11498	-4.43125	1.25527	-3.53011	0.00041539	0.00159294	VHLL	391104
ENSG00000130876	5.98899	-4.4445	1.24493	-3.57008	0.00035688	0.00138772	SLC7A10	56301
ENSG00000237818	9.21857	-4.51097	1.10317	-4.08911	4.33e-05	0.00020118	RPS3AP29	730861
ENSG00000235686	3.91818	-4.52973	1.40166	-3.23168	0.00123065	0.00425295	PPIAP20	100500737
ENSG00000236138	6.47756	-4.53765	1.19721	-3.79018	0.00015054	0.00063152	DUX4L26	100996350
ENSG00000234109	2.32855	-4.54713	1.63152	-2.78705	0.00531909	0.015695	RPL7P36	100271218
ENSG00000260675	2.32105	-4.55916	1.61634	-2.82066	0.00479246	0.0143105	TCERG1P2	100421029
ENSG00000239199	6.50755	-4.56204	1.22583	-3.72158	0.00019798	0.00081134	RPL21P6	652975
ENSG00000184344	21.1852	-4.56725	1.17693	-3.88065	0.00010418	0.0004517	GDF3	9573
ENSG00000283051	10.2102	-4.57352	1.03186	-4.43228	9.32e-06	4.86e-05	LINC01668	101928311
ENSG00000286958	2.39926	-4.59267	1.57343	-2.91888	0.0035129	0.0108606	LOC105376435	105376435
ENSG00000233079	2.42841	-4.61496	1.98099	-2.32963	0.0198257	0.0495053	LINC01755	105378738
ENSG00000176571	2.43881	-4.62308	1.4354	-3.22076	0.0012785	0.0043969	CNBD1	168975
ENSG00000274618	2.48291	-4.63918	1.7424	-2.66252	0.00775576	0.0219098	H4C6	8361
ENSG00000260161	2.49901	-4.65816	1.98934	-2.34156	0.0192034	0.0481435	MTCYBP28	107075134
ENSG00000265188	4.34853	-4.67983	1.42328	-3.28805	0.00100882	0.00355149	LOC100422274	100422274
ENSG00000285445	2.56259	-4.68469	1.54141	-3.03922	0.00237194	0.00766067	TUSC2P2	112552163
ENSG00000230447	4.42558	-4.71744	1.79639	-2.62606	0.00863788	0.0241164	CTF2P	100289419
ENSG00000188425	2.671	-4.74479	1.50347	-3.15588	0.00160014	0.00537334	NANOS2	339345
ENSG00000214842	15.3103	-4.76588	1.04978	-4.53987	5.63e-06	3.04e-05	RAD51AP2	729475
ENSG00000232913	2.7537	-4.79683	1.97172	-2.43282	0.0149819	0.038882	PLCE1-AS2	101927049
ENSG00000106633	2.77335	-4.80711	1.52066	-3.16119	0.00157124	0.00528979	GCK	2645
ENSG00000257127	2.79279	-4.81926	1.94523	-2.47748	0.0132314	0.0348999	CLLU1	574028
ENSG00000206599	2.81836	-4.82776	1.96152	-2.46124	0.0138458	0.0362632	RNU6-841P	106480699
ENSG00000178795	2.83002	-4.83373	1.96082	-2.46516	0.0136952	0.0359452	GDPD4	220032
ENSG00000226969	12.0434	-4.83769	1.05216	-4.59788	4.27e-06	2.35e-05	PRKCZ-DT	105378591
ENSG00000204403	2.88751	-4.86753	1.96761	-2.47383	0.0133674	0.0352186	CASP12	100506742
ENSG00000130643	2.94345	-4.88779	1.99546	-2.44946	0.0143072	0.0373228	CALY	50632
ENSG00000154227	2.96325	-4.90286	1.92082	-2.55248	0.0106958	0.0290324	CERS3	204219
ENSG00000171611	2.98103	-4.90483	2.00235	-2.44954	0.0143041	0.037317	PTCRA	171558
ENSG00000214336	3.03492	-4.93517	1.96014	-2.51777	0.01181	0.0316039	FOXI3	344167
ENSG00000173673	3.03094	-4.93894	1.95786	-2.52262	0.0116484	0.0312498	HES3	390992
ENSG00000100804	150.973	-4.94421	1.81018	-2.73134	0.00630769	0.0182458	PSMB5	5693
ENSG00000170310	39.6916	-4.96911	1.18473	-4.1943	2.74e-05	0.00013154	STX8	9482
ENSG00000236611	3.11567	-4.97151	2.01449	-2.46788	0.0135917	0.0357141	LINC02556	102724679
ENSG00000262179	5.33225	-4.99682	1.26435	-3.9521	7.75e-05	0.00034346	MYMX	101929726
ENSG00000104921	3.28088	-5.04715	1.93877	-2.60328	0.0092337	0.0255194	FCER2	2208
ENSG00000177047	3.29205	-5.0567	1.91852	-2.63573	0.00839561	0.0235117	IFNW1	3467
ENSG00000207691	3.3113	-5.05812	1.40321	-3.60469	0.00031253	0.00122985	MIR183	406959
ENSG00000238284	3.30262	-5.06619	1.46365	-3.46133	0.00053752	0.00200978	LINC01448	101928795
ENSG00000166317	3.33014	-5.07	1.8845	-2.69037	0.00713723	0.020342	SYNPO2L	79933
ENSG00000241709	5.69066	-5.08435	1.46869	-3.46182	0.00053653	0.00200627	RN7SL265P	106479318
ENSG00000252688	3.38193	-5.09095	1.38221	-3.68319	0.00023034	0.00093192	RNU6-579P	106481364
ENSG00000096088	14.1904	-5.09149	1.00092	-5.08683	3.64e-07	2.34e-06	PGC	5225
ENSG00000123454	3.38174	-5.09297	1.96482	-2.59208	0.00953979	0.026275	DBH	1621
ENSG00000260172	3.37954	-5.09658	1.40702	-3.62226	0.00029204	0.00115687	LINC01413	101928611
ENSG00000258779	3.44655	-5.11403	1.37435	-3.72105	0.0001984	0.00081297	LINC01568	100506172
ENSG00000252755	3.4503	-5.1158	1.38679	-3.68895	0.00022518	0.00091286	RNU6-703P	106479876
ENSG00000228940	3.44018	-5.11664	1.92796	-2.65392	0.00795632	0.0224105	LOC100128362	100128362
ENSG00000176771	1852.35	-5.13036	0.947854	-5.41261	6.21e-08	4.46e-07	NCKAP5	344148
ENSG00000116882	3.49136	-5.13303	1.99746	-2.56978	0.0101762	0.0278331	HAO2	51179
ENSG00000172938	3.49436	-5.13593	1.9276	-2.66442	0.00771217	0.0217961	MRGPRD	116512
ENSG00000160991	256.543	-5.14159	1.42061	-3.6193	0.0002954	0.00116982	ORAI2	80228
ENSG00000165821	3.50407	-5.14664	1.4373	-3.58078	0.00034257	0.00133816	SALL2	6297
ENSG00000263201	3.60249	-5.17817	1.92178	-2.69446	0.00705025	0.020132	DPEP2NB	100131303
ENSG00000169856	3.60773	-5.18221	1.95398	-2.65213	0.00799859	0.0225215	ONECUT1	3175
ENSG00000241361	3.67828	-5.21435	1.31438	-3.96714	7.27e-05	0.00032421	SLC25A24P1	727941
ENSG00000180999	3.73096	-5.23248	1.88591	-2.77451	0.00552854	0.0162352	C1orf105	92346
ENSG00000231013	3.73496	-5.23635	1.85223	-2.82705	0.00469784	0.0140621	SCTR-AS1	107105282
ENSG00000247809	162.053	-5.27268	0.508886	-10.3612	3.72e-25	1.11e-23	NR2F2-AS1	644192
ENSG00000251389	6.55891	-5.30404	1.46995	-3.60831	0.0003082	0.00121462	YTHDF1P1	402220
ENSG00000167434	3.92426	-5.31275	1.3223	-4.0178	5.87e-05	0.00026669	CA4	762
ENSG00000118156	4.04875	-5.3508	1.26429	-4.23227	2.31e-05	0.00011241	ZNF541	84215
ENSG00000159173	4.10574	-5.37389	1.37075	-3.92041	8.84e-05	0.00038872	TNNI1	7135
ENSG00000236241	4.12657	-5.38015	1.34622	-3.99647	6.43e-05	0.00028951	LOC100421238	100421238
ENSG00000132692	260.503	-5.40078	1.30514	-4.1381	3.5e-05	0.00016533	BCAN	63827
ENSG00000115616	4.30155	-5.4412	1.83903	-2.95873	0.00308911	0.00968001	SLC9A2	6549
ENSG00000189184	4.32825	-5.44496	1.33565	-4.07663	4.57e-05	0.00021109	PCDH18	54510
ENSG00000178722	4.35112	-5.45615	1.55892	-3.49995	0.00046534	0.00176744	C5orf64	285668
ENSG00000129991	4.45224	-5.48683	1.85136	-2.96367	0.00303989	0.00953641	TNNI3	7137
ENSG00000231090	4.45542	-5.48691	1.46446	-3.74671	0.00017917	0.00074119	MIR4422HG	109729135
ENSG00000168621	4.70263	-5.56331	1.9113	-2.91074	0.00360571	0.0111245	GDNF	2668
ENSG00000233633	4.70716	-5.56433	1.33855	-4.15699	3.22e-05	0.00015312	LOC105373352	105373352
ENSG00000143196	4.72827	-5.57866	1.58929	-3.51015	0.00044785	0.00170793	DPT	1805
ENSG00000266524	4.75155	-5.58147	1.42442	-3.91841	8.91e-05	0.00039165	GDF10	2662
ENSG00000168135	4.76641	-5.58721	1.81182	-3.08376	0.00204402	0.00670557	KCNJ4	3761
ENSG00000111058	4.80875	-5.60151	1.92858	-2.90447	0.0036787	0.0113248	ACSS3	79611
ENSG00000182132	5.06624	-5.67432	1.39557	-4.06595	4.78e-05	0.00022024	KCNIP1	30820
ENSG00000142025	5.09476	-5.68517	1.3237	-4.29491	1.75e-05	8.67e-05	DMRTC2	63946
ENSG00000172179	5.17885	-5.70211	1.34786	-4.23049	2.33e-05	0.00011322	PRL	5617
ENSG00000170231	5.20418	-5.71524	1.47366	-3.87825	0.00010521	0.00045563	FABP6	2172
ENSG00000232190	5.27189	-5.73179	1.81455	-3.1588	0.00158422	0.00532666	LINC02181	440390
ENSG00000223382	5.28117	-5.73433	1.24439	-4.60814	4.06e-06	2.24e-05	LINC01778	105378622
ENSG00000197308	5.40956	-5.7752	1.31607	-4.38823	1.14e-05	5.85e-05	GATA3-AS1	399717
ENSG00000002726	5.45547	-5.77845	1.21935	-4.73895	2.15e-06	1.24e-05	AOC1	26
ENSG00000165457	5.9051	-5.89473	1.79788	-3.27871	0.00104281	0.00365774	FOLR2	2350
ENSG00000288611	6.14367	-5.95624	1.32081	-4.50955	6.5e-06	3.48e-05	NPBWR1	2831
ENSG00000234988	6.62047	-6.0621	1.7849	-3.39633	0.00068295	0.00249854	LINC01849	105373507
ENSG00000108242	6.98653	-6.13721	1.79958	-3.41037	0.00064875	0.00238583	CYP2C18	1562
ENSG00000258700	7.31042	-6.20481	1.41576	-4.38266	1.17e-05	5.99e-05	LINC00871	100506412
ENSG00000187616	7.4075	-6.22305	1.28522	-4.84201	1.29e-06	7.65e-06	MYMK	389827
ENSG00000249035	7.56739	-6.25307	1.3147	-4.75626	1.97e-06	1.14e-05	CLMAT3	101927096
ENSG00000182492	7.59565	-6.25883	1.7541	-3.56811	0.00035957	0.00139722	BGN	633
ENSG00000164100	7.65241	-6.26991	1.74343	-3.59632	0.00032275	0.00126718	NDST3	9348
ENSG00000254854	7.90026	-6.31733	1.24358	-5.07996	3.78e-07	2.42e-06	NECTIN1-DT	102724301
ENSG00000104267	8.50914	-6.42337	1.83306	-3.50418	0.00045802	0.0017418	CA2	760
ENSG00000225768	9.03818	-6.50902	1.22066	-5.33238	9.69e-08	6.77e-07	LINC02620	101927523
ENSG00000166147	3626.57	-6.86427	2.32322	-2.95464	0.00313035	0.00979523	FBN1	2200
ENSG00000148671	14.3091	-7.17117	1.71696	-4.17667	2.96e-05	0.00014135	ADIRF	10974
ENSG00000188100	14.3091	-7.17117	1.71696	-4.17667	2.96e-05	0.00014135	FAM25A	643161
ENSG00000240089	14.3091	-7.17117	1.71696	-4.17667	2.96e-05	0.00014135	BMS1P3	414217
ENSG00000271880	14.3091	-7.17117	1.71696	-4.17667	2.96e-05	0.00014135	AGAP11	119385
ENSG00000102678	16.6601	-7.39413	1.10337	-6.70138	2.06e-11	2.24e-10	FGF9	2254
ENSG00000106028	190.026	-8.06966	3.28746	-2.45468	0.0141011	0.0368633	SSBP1	6742
ENSG00000270923	190.026	-8.06966	3.28746	-2.45468	0.0141011	0.0368633	TAS2R6P	448990
ENSG00000258135	52.2595	-9.0431	1.06511	-8.49027	2.06e-17	3.86e-16	LINC02396	283332
ENSG00000007866	104.71	-10.0436	2.80272	-3.58352	0.00033899	0.00132577	TEAD3	7005
ENSG00000112041	104.71	-10.0436	2.80272	-3.58352	0.00033899	0.00132577	TULP1	7287
ENSG00000081051	162.881	-10.681	2.84949	-3.7484	0.00017796	0.00073652	AFP	174
ENSG00000188906	245.119	-11.2707	2.92886	-3.84814	0.00011902	0.00050938	LRRK2	120892
ENSG00000067177	962.082	-13.2433	3.11972	-4.24503	2.19e-05	0.00010668	PHKA1	5255
ENSG00000112130	157.367	-24.9533	3.38359	-7.37479	1.65e-13	2.21e-12	RNF8	9025
ENSG00000239953	157.367	-24.9533	3.38359	-7.37479	1.65e-13	2.21e-12	RN7SL273P	106481834
ENSG00000129226	7192.46	-30	3.38338	-8.86688	7.52e-19	1.52e-17	CD68	968
