# Supplementary material for: PPARγ mediated enhanced lipid biogenesis fuels Mycobacterium tuberculosis growth in a drug-tolerant hepatocyte environment
Source: eLife. 2025 Dec 8;14:RP103817. doi: 10.7554/eLife.103817 (PMC12685304; doi:10.7554/eLife.103817)
Supplement: Figure 5—figure supplement 1—source data 1. [file elife-103817-fig5-figsupp1-data1.xlsx]

## Sheet: fig5-fig supp 1-source sata 1
	Fold change of Tgs1 transcript in the Mtb isolated from Hepg2, the expression of the transcript in DMEM grown Mtb is considered to be 1												Statistical calculation for Tgs1 fold change
													Unpaired t test
	Tgs1												P value	0.0018
	9.188												P value summary	**
	6.105												Significantly different (P < 0.05)?	Yes
	7.48												One- or two-tailed P value?	Two-tailed
													t, df	t=7.391, df=4
	Fold change of Tgs4 transcript in the Mtb isolated from Hepg2, the expression of the transcript in DMEM grown Mtb is considered to be 1												Statistical calculation for Tgs4 fold change
	Tgs4												Unpaired t test
	7.56												P value	<0.0001
	8.81												P value summary	****
	8.85												Significantly different (P < 0.05)?	Yes
													One- or two-tailed P value?	Two-tailed
													t, df	t=17.49, df=4
	Fold change of Rv1760 transcript in the Mtb isolated from Hepg2, the expression of the transcript in DMEM grown Mtb is considered to be 1												Statistical calculation for Rv1760 fold change
	Rv1760												Unpaired t test
	4.69												P value	0.0355
	2.02												P value summary	*
	4.8												Significantly different (P < 0.05)?	Yes
													One- or two-tailed P value?	Two-tailed
													t, df	t=3.121, df=4
	Fold change of LipY transcript in the Mtb isolated from Hepg2, the expression of the transcript in DMEM grown Mtb is considered to be 1												Statistical calculation for LipY fold change
	LipY												Unpaired t test
	3.31												P value	0.0085
	3.7												P value summary	**
	2.25												Significantly different (P < 0.05)?	Yes
													One- or two-tailed P value?	Two-tailed
													t, df	t=4.817, df=4
	Fold change of AcrA1 transcript in the Mtb isolated from Hepg2, the expression of the transcript in DMEM grown Mtb is considered to be 1												Statistical calculation for AcrA1 fold change
	AcrA1
													Unpaired t test
	1.2												P value	0.1087
	2.4												P value summary	ns
	3.5												Significantly different (P < 0.05)?	No
													One- or two-tailed P value?	Two-tailed
													t, df	t=2.058, df=4
