# Supplementary material for: PPARγ mediated enhanced lipid biogenesis fuels Mycobacterium tuberculosis growth in a drug-tolerant hepatocyte environment
Source: eLife. 2025 Dec 8;14:RP103817. doi: 10.7554/eLife.103817 (PMC12685304; doi:10.7554/eLife.103817)
Supplement: Figure 5—figure supplement 3—source data 1. [file elife-103817-fig5-figsupp3-data1.xlsx]

## Sheet: Figure 5-fig supp3-source data1
LipidTOX intensity in the livers of the Mtb infected mice at the mentioned time points post infection		week 2	week 4	week 8
		0.029401	0.00594257	0.0285879
		0.0194451	0.00594257	0.0200674
		0.00951665	0.0177871	0.0248562			Tukey's multiple comparisons test	Mean Diff.	95.00% CI of diff.	Below threshold?	Summary	Adjusted P Value
		0.00425085	0.0172234	0.0137843			week 2 vs. week 4	-0.002998	-0.01557 to 0.009570	No	ns	0.833	A-B
		0.0188667	0.00503383	0.0234496			week 2 vs. week 8	-0.02007	-0.03264 to -0.007506	Yes	***	0.001	A-C
		0.014542	0.015045	0.0409339			week 4 vs. week 8	-0.01708	-0.02964 to -0.004508	Yes	**	0.0053	B-C
		0.0231881	0.0180815	0.0374307
		0.0216347	0.0167321	0.0218616			Test details	Mean 1	Mean 2	Mean Diff.	SE of diff.	n1	n2	q	DF
		0.0136598	0.00587888	0.0177686			week 2 vs. week 4	0.01309	0.01609	-0.002998	0.005197	17	17	0.8159	48
		0.00859669	0.00886188	0.0444839			week 2 vs. week 8	0.01309	0.03317	-0.02007	0.005197	17	17	5.463	48
		0.010398	0.00963884	0.0702332			week 4 vs. week 8	0.01609	0.03317	-0.01708	0.005197	17	17	4.647	48
		0.00371426	0.0324243	0.0250818
		0.0102134	0.0210441	0.0203328
		0.00645759	0.00362103	0.0245836
		0.013463	0.00489445	0.0137966
		0.00647255	0.0135411	0.0762761
		0.00878577	0.0718806	0.0603399
