# Supplementary material for: PPARγ mediated enhanced lipid biogenesis fuels Mycobacterium tuberculosis growth in a drug-tolerant hepatocyte environment
Source: eLife. 2025 Dec 8;14:RP103817. doi: 10.7554/eLife.103817 (PMC12685304; doi:10.7554/eLife.103817)
Supplement: Figure 5—source data 1. [file elife-103817-fig5-data1.xlsx]

## Sheet: Figure 5-Source data 1
Number of lipid droplets / cell-Figure 5B
	UI, HepG2	I, HepG2	UI, PHCs	I. PHCs		Statistical parameters for Figure 5B
	8	30	30	39		Infected HepG2 vs Uninfected HepG2
	12	32	34	40		P value	<0.0001
	5	25	31	41		P value summary	****
	3	45	20	42		Significantly different (P < 0.05)?	Yes
	6	19	30	44		One- or two-tailed P value?	Two-tailed
	7	25	32	40		t, df	t=10.59, df=34
	7	20	31	37
	5	27	33	50
	11	25	29	40		Infected PHCs Vs Uninfected PHCS
	10	30	30	41
	15	32	36	35		P value	<0.0001
	12	21	32	37		P value summary	****
	12	22	30	43		Significantly different (P < 0.05)?	Yes
	9	24	33	42		One- or two-tailed P value?	Two-tailed
	9	30	22	30		t, df	t=5.926, df=34
	6	21	21	50
	4	33	32	30
	10	19	25	32
