# Supplementary material for: PPARγ mediated enhanced lipid biogenesis fuels Mycobacterium tuberculosis growth in a drug-tolerant hepatocyte environment
Source: eLife. 2025 Dec 8;14:RP103817. doi: 10.7554/eLife.103817 (PMC12685304; doi:10.7554/eLife.103817)
Supplement: Figure 5—source data 2. [file elife-103817-fig5-data2.xlsx]

## Sheet: Figure 5-Source data 2
	Mean fluorescent intensities of Lipid droplets at the mentioned time points-Figure 5C
						Statistical parameters for Figure 5C
	24 HPI	48 HPI	72 HPI	96 HPI
	1738	2312	3212	3302
	1620	2555	2870	3100		Tukey's multiple comparisons test	Mean diff.	95.00% CI of diff.	Below threshold?	Summary	Adjusted P Value
	1648	2472	2880	3400		24 HPI vs. 48 HPI	-777.7	-1148 to -407.1	Yes	***	0.0007	A-B
						24 HPI vs. 72 HPI	-1319	-1689 to -948.1	Yes	****	<0.0001	A-C
						24 HPI vs. 96 HPI	-1599	-1969 to -1228	Yes	****	<0.0001	A-D
						48 HPI vs. 72 HPI	-541	-911.6 to -170.4	Yes	**	0.0069	B-C
						48 HPI vs. 96 HPI	-821	-1192 to -450.4	Yes	***	0.0005	B-D
						72 HPI vs. 96 HPI	-280	-650.6 to 90.56	No	ns	0.1502	C-D
						Test details	Mean 1	Mean 2	Mean diff.	SE of diff.	n1	n2	q	DF
						24 HPI vs. 48 HPI	1669	2446	-777.7	115.7	3	3	9.504	8
						24 HPI vs. 72 HPI	1669	2987	-1319	115.7	3	3	16.12	8
						24 HPI vs. 96 HPI	1669	3267	-1599	115.7	3	3	19.54	8
						48 HPI vs. 72 HPI	2446	2987	-541	115.7	3	3	6.612	8
						48 HPI vs. 96 HPI	2446	3267	-821	115.7	3	3	10.03	8
						72 HPI vs. 96 HPI	2987	3267	-280	115.7	3	3	3.422	8
