# Supplementary material for: PPARγ mediated enhanced lipid biogenesis fuels Mycobacterium tuberculosis growth in a drug-tolerant hepatocyte environment
Source: eLife. 2025 Dec 8;14:RP103817. doi: 10.7554/eLife.103817 (PMC12685304; doi:10.7554/eLife.103817)
Supplement: Figure 5—source data 3. [file elife-103817-fig5-data3.xlsx]

## Sheet: Figure 5-Source data 3
		Cholesterol								Statistical parameters for figure 5E, Cholesterol
		UI_24 hr.	I_24 hr.	UI_48 hr.	I_48 hr.					Tukey's multiple comparisons test	Mean Diff.	95.00% CI of diff.	Below threshold?	Summary	Adjusted P Value
		17818	8712	21095	7153					UI_24 hr. vs. I_24 hr.	8726	3753 to 13699	Yes	**	0.0022	A-B
		15092	6777	24872	6712					UI_24 hr. vs. I_48 hr.	8333	3360 to 13305	Yes	**	0.003	A-D
		14666	5909	19184	8713					I_24 hr. vs. I_48 hr.	-393.3	-5366 to 4579	No	ns	0.9938	B-D
										UI_48 hr. vs. I_48 hr.	14191	9218 to 19164	Yes	****	<0.0001	C-D
			UI: Uninfected
			I:Infected
										Test details	Mean 1	Mean 2	Mean Diff.	SE of diff.	n1	n2	q	DF
										UI_24 hr. vs. I_24 hr.	15859	7133	8726	1553	3	3	7.947	8
										UI_24 hr. vs. I_48 hr.	15859	7526	8333	1553	3	3	7.589	8
										I_24 hr. vs. I_48 hr.	7133	7526	-393.3	1553	3	3	0.3582	8
										UI_48 hr. vs. I_48 hr.	21717	7526	14191	1553	3	3	12.92	8
		TAGS
													Statistical parameters for Figure 5E, TAGs
			18:0/36:1			18:0/36:2			18:1/36:2
		UI_24 hr.	326237	342674	398375	555635	616514	615434	1083784	1212844	1098193		Tukey's multiple comparisons test	Mean Diff.	95.00% CI of diff.	Below threshold?	Summary	Adjusted P Value
		I_24 hr.	587675	616556	712908	981934	887624	880983	1751634	1871637	1887625
		UI_48 hr.	387263	332092	309839	665413	542544	654152	1019834	1175163	1187613		UI_24 hr. vs. I_24 hr.	-436543	-661768 to -211317	Yes	**	0.0012
		I_48 hr.	538982	528624	609284	987183	909188	988863	1917889	1871637	1715674		UI_24 hr. vs. I_48 hr.	-424182	-670886 to -177478	Yes	**	0.0025
													I_24 hr. vs. I_48 hr.	12361	-100104 to 124827	No	ns	0.984
													UI_48 hr. vs. I_48 hr.	-421490	-681006 to -161974	Yes	**	0.0036
													Test details	Mean 1	Mean 2	Mean Diff.	SE of diff.	N1	N2	q	DF
													UI_24 hr. vs. I_24 hr.	694410	1130953	-436543	70331	9	9	8.778	8
													UI_24 hr. vs. I_48 hr.	694410	1118592	-424182	77038	9	9	7.787	8
													I_24 hr. vs. I_48 hr.	1130953	1118592	12361	35120	9	9	0.4978	8
													UI_48 hr. vs. I_48 hr.	697101	1118592	-421490	81039	9	9	7.355	8
													Statistical parameters for Figure 5E, Ces
		CEs											Tukey's multiple comparisons test	Mean Diff.	95.00% CI of diff.	Below threshold?	Summary	Adjusted P Value
			CE 18:0			CE 18:1			CE 16:0				UI_24 hr. vs. I_24 hr.	-2397	-3427 to -1367	Yes	****	<0.0001
		UI_24 hr.	5612	4112	3819	7165	8164	6664	6752	7264	8763		UI_24 hr. vs. I_48 hr.	-3757	-4787 to -2727	Yes	****	<0.0001
		I_24 hr.	8716	7615	9912	9532	10123	8726	8645	8987	7635		I_24 hr. vs. I_48 hr.	-1360	-2390 to -330.1	Yes	**	0.0066
		UI_48 hr.	7812	6762	6455	7156	9183	8176	7478	7661	8254		UI_48 hr. vs. I_48 hr.	-2577	-3607 to -1547	Yes	****	<0.0001
		I_48 hr.	10122	11282	10254	9568	10924	9982	9837	9952	10210
													Test details	Mean 1	Mean 2	Mean Diff.	SE of diff.	N1	N2	q	DF
													UI_24 hr. vs. I_24 hr.	6479	8877	-2397	373.3	9	9	9.081	24
													UI_24 hr. vs. UI_48 hr.	6479	7660	-1180	373.3	9	9	4.471	24
													UI_24 hr. vs. I_48 hr.	6479	10237	-3757	373.3	9	9	14.23	24
													I_24 hr. vs. UI_48 hr.	8877	7660	1217	373.3	9	9	4.61	24
													I_24 hr. vs. I_48 hr.	8877	10237	-1360	373.3	9	9	5.152	24
													UI_48 hr. vs. I_48 hr.	7660	10237	-2577	373.3	9	9	9.762	24
		DAGs
				34:1			36:1			36:2			Statistical parameters for figure 5E, DAGs
			UI_24 hr.	326237	342674	398375	78666	86346	87634	119817	109895	109992
			I_24 hr.	587675	616556	712908	91874	67646	77635	129823	109182	118764	Tukey's multiple comparisons test	Mean Diff.	95.00% CI of diff.	Below threshold?	Summary	Adjusted P Value
			UI_48 hr.	387263	332092	309839	71874	76525	70364	101834	109871	106229
			Inf_48 hr.	538982	628624	609284	81673	87364	92871	132874	135652	129923	UI_24 hr. vs. I_24 hr.	-94714	-132105 to -57323	Yes	****	<0.0001
													UI_24 hr. vs. Inf_48 hr.	-86401	-123792 to -49010	Yes	****	<0.0001
													I_24 hr. vs. Inf_48 hr.	8313	-29078 to 45704	No	ns	0.9268
													UI_48 hr. vs. Inf_48 hr.	-96817	-134209 to -59426	Yes	****	<0.0001
