# Supplementary material for: PPARγ mediated enhanced lipid biogenesis fuels Mycobacterium tuberculosis growth in a drug-tolerant hepatocyte environment
Source: eLife. 2025 Dec 8;14:RP103817. doi: 10.7554/eLife.103817 (PMC12685304; doi:10.7554/eLife.103817)
Supplement: Figure 5—source data 4. [file elife-103817-fig5-data4.xlsx]

## Sheet: Figure 5-Source data 4
Log 10_CFU/ml of Mtb in primary hepatocytes-Figure 5G
									Statistical parameters for Figure 5G
									Tukey's multiple comparisons test	Mean Diff.	95.00% CI of diff.	Below threshold?	Summary	Adjusted P Value
	Primary hepatocytes ( Log 10 CFU/ml)								DMSO vs. OA-BSA	-0.3815	-0.6337 to -0.1293	Yes	**	0.0026	A-B
	DMSO	OA-BSA	T863	C75					DMSO vs. T863	0.6249	0.3727 to 0.8772	Yes	****	<0.0001	A-C
	5.65321	5.95424	5.07918	4.87506					DMSO vs. C75	0.8566	0.6043 to 1.109	Yes	****	<0.0001	A-D
	5.77815	6.07918	4.90309	4.69897					OA-BSA vs. T863	1.006	0.7542 to 1.259	Yes	****	<0.0001	B-C
	5.38021	5.92942	4.88081	4.72428					OA-BSA vs. C75	1.238	0.9858 to 1.490	Yes	****	<0.0001	B-D
	5.47712	6.04139	4.95424	4.92942					T863 vs. C75	0.2316	-0.02059 to 0.4839	No	ns	0.0777	C-D
	5.65321	5.8451	5	4.43136
