# Supplementary material for: PPARγ mediated enhanced lipid biogenesis fuels Mycobacterium tuberculosis growth in a drug-tolerant hepatocyte environment
Source: eLife. 2025 Dec 8;14:RP103817. doi: 10.7554/eLife.103817 (PMC12685304; doi:10.7554/eLife.103817)
Supplement: Figure 5—source data 5. [file elife-103817-fig5-data5.xlsx]

## Sheet: Figure 5-Source data 5
Log 10_CFU/ml of Mtb in HepG2-Figure 5H
	DMSO	OA-BSA	T863	C75			Statistical parameters for Figure 5H
	5.95424	6.17609	5.14613	5
	5.88649	6.16137	5.30103	4.90309			Tukey's multiple comparisons test	Mean Diff.	95.00% CI of diff.	Below threshold?	Summary	Adjusted P Value
	5.91381	6.21484	5.11394	5.38021			DMSO vs. OA-BSA	-0.2435	-0.5187 to 0.03176	No	ns	0.0896	A-B
	6	6.17609	5.25527	4.8451			DMSO vs. T863	0.7345	0.4593 to 1.010	Yes	****	<0.0001	A-C
							DMSO vs. C75	0.9065	0.6313 to 1.182	Yes	****	<0.0001	A-D
							OA-BSA vs. T863	0.978	0.7028 to 1.253	Yes	****	<0.0001	B-C
							OA-BSA vs. C75	1.15	0.8748 to 1.425	Yes	****	<0.0001	B-D
							T863 vs. C75	0.172	-0.1032 to 0.4472	No	ns	0.2964	C-D
