# Supplementary material for: PPARγ mediated enhanced lipid biogenesis fuels Mycobacterium tuberculosis growth in a drug-tolerant hepatocyte environment
Source: eLife. 2025 Dec 8;14:RP103817. doi: 10.7554/eLife.103817 (PMC12685304; doi:10.7554/eLife.103817)
Supplement: Figure 5—source data 6. [file elife-103817-fig5-data6.xlsx]

## Sheet: Figure 5-Source data 6
Log10_CFU/ml of Mtb in THP-1 cells-Figure 5I										Statistical parameters for Figure 5I
										Tukey's multiple comparisons test	Mean Diff.	95.00% CI of diff.	Below threshold?	Summary	Adjusted P Value
	THP-1									DMSO vs. OA-BSA	-0.0434	-0.6163 to 0.5295	No	ns	0.9958	A-B
	DMSO	OA-BSA	T863	C75						DMSO vs. T863	-0.003851	-0.5768 to 0.5691	No	ns	>0.9999	A-C
	5.81291	5.97772	5.74036	5.07918						DMSO vs. C75	0.7211	0.1481 to 1.294	Yes	*	0.0131	A-D
	5.8451	5	5.69897	4.95424						OA-BSA vs. T863	0.03955	-0.5334 to 0.6125	No	ns	0.9968	B-C
	5.62325	6.07918	5.85733	5.02119						OA-BSA vs. C75	0.7645	0.1915 to 1.337	Yes	**	0.0088	B-D
	5.69897	6.09691	5.69897	5.04139						T863 vs. C75	0.7249	0.1520 to 1.298	Yes	*	0.0126	C-D
