# Supplementary material for: PPARγ mediated enhanced lipid biogenesis fuels Mycobacterium tuberculosis growth in a drug-tolerant hepatocyte environment
Source: eLife. 2025 Dec 8;14:RP103817. doi: 10.7554/eLife.103817 (PMC12685304; doi:10.7554/eLife.103817)
Supplement: Figure 6—figure supplement 1—source data 1. [file elife-103817-fig6-figsupp1-data1.xlsx]

## Sheet: Fig6-fig supp1-source data 1
	Figure 6-figure supplement 1A
	Fold change of PPARG transcript in the Mtb infected HepG2 , the expression of the transcript in uninfected cell is considered to be 1												Statistical calculation for PPARG fold change
	PPARG												Unpaired t test
	2.66												P value	0.0008
	3.98												P value summary	***
	2.97												Significantly different (P < 0.05)?	Yes
	4.31												One- or two-tailed P value?	Two-tailed
													t, df	t=6.280, df=6
	Fold change of FASN transcript in the Mtb infected HepG2 , the expression of the transcript in uninfected cell is considered to be 1												Statistical calculation for FASN fold change
	FASN
	2.49												Unpaired t test
	2.36												P value	0.0003
	3.28												P value summary	***
	2.42												Significantly different (P < 0.05)?	Yes
													One- or two-tailed P value?	Two-tailed
													t, df	t=7.588, df=6
	Fold change of DGAT1 transcript in the Mtb infected HepG2 , the expression of the transcript in uninfected cell is considered to be 1												Statistical calculation for DGAT1 fold change
	DGAT1
	1.98												Unpaired t test
	2.46												P value	0.0002
	2.48												P value summary	***
	2.88												Significantly different (P < 0.05)?	Yes
													One- or two-tailed P value?	Two-tailed
													t, df	t=7.875, df=6
	Fold change of DGAT2 transcript in the Mtb infected HepG2 , the expression of the transcript in uninfected cell is considered to be 1												Statistical calculation for DGAT2 fold change
	DGAT2
	4.56												Unpaired t test
	2.33												P value	0.018
	2.43												P value summary	*
	2.5												Significantly different (P < 0.05)?	Yes
													One- or two-tailed P value?	Two-tailed
													t, df	t=3.646, df=6
	Fold change of ACAT1 transcript in the Mtb infected HepG2 , the expression of the transcript in uninfected cell is considered to be 1												Statistical calculation for ACAT1 fold change
	ACAT1												Unpaired t test
	2.73												P value	<0.0001
	3.0014												P value summary	****
	2.37												Significantly different (P < 0.05)?	Yes
	3.17												One- or two-tailed P value?	Two-tailed
													t, df	t=10.41, df=6
	Fold change of ACAT2 transcript in the Mtb infected HepG2 , the expression of the transcript in uninfected cell is considered to be 1												Statistical calculation for ACAT2 fold change
	ACAT2												P value	<0.0001
	3.11												P value summary	****
	2.98												Significantly different (P < 0.05)?	Yes
	3.67												One- or two-tailed P value?	Two-tailed
	3.89												t, df	t=11.04, df=6
	Fold change of MGAT1 transcript in the Mtb infected HepG2 , the expression of the transcript in uninfected cell is considered to be 1												Statistical calculation for MGAT1 fold change
	MGAT1												Unpaired t test
	2.45												P value	0.0005
	2.11												P value summary	***
	2.56												Significantly different (P < 0.05)?	Yes
	3.21												One- or two-tailed P value?	Two-tailed
													t, df	t=6.879, df=6
	Fold change of FSP27 transcript in the Mtb infected HepG2 , the expression of the transcript in uninfected cell is considered to be 1												Statistical calculation for FSP27 fold change
	FSP27												Unpaired t test
	2.11												P value	0.0001
	1.97												P value summary	***
	2.56												Significantly different (P < 0.05)?	Yes
	2.013												One- or two-tailed P value?	Two-tailed
													t, df	t=8.588, df=6
