# Supplementary material for: PPARγ mediated enhanced lipid biogenesis fuels Mycobacterium tuberculosis growth in a drug-tolerant hepatocyte environment
Source: eLife. 2025 Dec 8;14:RP103817. doi: 10.7554/eLife.103817 (PMC12685304; doi:10.7554/eLife.103817)
Supplement: Figure 6—figure supplement 1—source data 2. [file elife-103817-fig6-figsupp1-data2.xlsx]

## Sheet: Fig6-fig supp1-source data 2
Figure 6-figure supplement 1B
CFU/ml of Mtb in Mtb under the treatment of the mentioned chemical agents						Statistical parameters
		DMSO	T863	Rosiglitazone		Tukey's multiple comparisons test	Mean Diff.	95.00% CI of diff.	Below threshold?	Summary	Adjusted P Value
		460000	100000	950000		DMSO vs. T863	461000	355985 to 566015	Yes	****	<0.0001	A-B
		550000	80000	1000000		DMSO vs. Rosiglitazone	-343500	-454885 to -232115	Yes	****	<0.0001	A-C
		630000	100000	880000		T863 vs. Rosiglitazone	-804500	-915885 to -693115	Yes	****	<0.0001	B-C
		580000	140000	800000
		600000	95000			Test details	Mean 1	Mean 2	Mean Diff.	SE of diff.	n1	n2	q	DF
						DMSO vs. T863	564000	103000	461000	38882	5	5	16.77	11
						DMSO vs. Rosiglitazone	564000	907500	-343500	41241	5	4	11.78	11
						T863 vs. Rosiglitazone	103000	907500	-804500	41241	5	4	27.59	11
