# Supplementary material for: PPARγ mediated enhanced lipid biogenesis fuels Mycobacterium tuberculosis growth in a drug-tolerant hepatocyte environment
Source: eLife. 2025 Dec 8;14:RP103817. doi: 10.7554/eLife.103817 (PMC12685304; doi:10.7554/eLife.103817)
Supplement: Figure 6—figure supplement 1—source data 3. [file elife-103817-fig6-figsupp1-data3.xlsx]

## Sheet: Fig6-fig supp1-source data 3
	Figure 6-figure supplement 1D
	PPARγ protein intensity normalised to area in the uninfected and infected mice liver	Statistical parameters
		uninfected	week 8, Infected		Unpaired t test with Welch's correction
		402.845	4434.84		P value	0.001
		416.206	3862.2		P value summary	**
		2001.18	2267.28		Significantly different (P < 0.05)?	Yes
		680.404	2534.67		One- or two-tailed P value?	Two-tailed
		361.225	3643.93		Welch-corrected t, df	t=4.212, df=12.85
		290.742	1647.14
		525.999	1289.53
		158.922	1499.64
		327.828	797.099
			1790.98
