# Supplementary material for: PPARγ mediated enhanced lipid biogenesis fuels Mycobacterium tuberculosis growth in a drug-tolerant hepatocyte environment
Source: eLife. 2025 Dec 8;14:RP103817. doi: 10.7554/eLife.103817 (PMC12685304; doi:10.7554/eLife.103817)
Supplement: Figure 6—figure supplement 1—source data 4. [file elife-103817-fig6-figsupp1-data4.xlsx]

## Sheet: Fig6-fig supp1-source data 4
	Figure 6-figure supplement 1E
	PPARγ intensity /cell in the uninfected and infected mice liver	Uninfected	Week 8, Infected
		0.004537	0.014477		Statistical parameters
		0.004719	0.012136		Unpaired t test with Welch's correction
		0.004409	0.01886		P value	<0.0001
		0.005607	0.026405		P value summary	****
		0.005819	0.011125		Significantly different (P < 0.05)?	Yes
		0.007933	0.022115		One- or two-tailed P value?	Two-tailed
		0.006705	0.012348		Welch-corrected t, df	t=9.127, df=30.04
		0.003467	0.021117
		0.003294	0.0152
		0.005871	0.015609
		0.003563	0.010293
		0.004265	0.0122
		0.00478	0.016681
		0.005819	0.016506
		0.00495	0.024403
		0.006873	0.017396
		0.009957	0.01897
		0.003243	0.018918
		0.0122	0.011584
		0.007918	0.011058
		0.006215	0.014841
		0.007496	0.00946
