# Supplementary material for: PPARγ mediated enhanced lipid biogenesis fuels Mycobacterium tuberculosis growth in a drug-tolerant hepatocyte environment
Source: eLife. 2025 Dec 8;14:RP103817. doi: 10.7554/eLife.103817 (PMC12685304; doi:10.7554/eLife.103817)
Supplement: Figure 6—source data 1. [file elife-103817-fig6-data1.xlsx]

## Sheet: Figure 6-Source data 1
Fold change of the genes in mice liver-Figure 6A
Pparg	0.615	0.65	0.77	0.578	1.08	1.32	2.19	1.6	2.07	2.26	2.65	3.2
Fasn	1.68	0.64	0.59	0.94	3.04	2.28	1.32	2.88	2.77	2.03	1.97	2.76
Dgat1	1.32	0.89	0.98	1.011	1.45	1.17	1.54	1.66	1.96	2.71	2.56	2.75
Dgat2	0.84	1.54	0.96	1.244	1.08	1.26	1.12	1.2	3.78	3.67	3.12	4.21
Acat1	1.4	1.72	3.5	2.69	2.55	2.76	2.87	2.54	2.61	2.01	2.11	1.9
Acat2	1.2	1.3	1.44	1.54	1.04	1.54	1.89	1.87	1.22	1.33	1.08	1.23
Pparalpha	0.97	1.11	1.23	1.03	0.8	1.03	1.2	1.03	1.22	1.33	1.08	1.23
			WEEK 2
					N=4 mice in each group
			WEEK 4
			WEEK 8
