# Supplementary material for: PPARγ mediated enhanced lipid biogenesis fuels Mycobacterium tuberculosis growth in a drug-tolerant hepatocyte environment
Source: eLife. 2025 Dec 8;14:RP103817. doi: 10.7554/eLife.103817 (PMC12685304; doi:10.7554/eLife.103817)
Supplement: Figure 6—source data 2. [file elife-103817-fig6-data2.xlsx]

## Sheet: Figure 6-Source data 2
Fold change of the Pparg transcripts in the mice liver-Figure 6B
				WEEK 2	WEEK 4	WEEK 8
				0.615	1.08	3.76		Statistical parameters for the Figure 6B
				0.65	1.32	4.35		Tukey's multiple comparisons test	Mean Diff.	95.00% CI of diff.	Below threshold?	Summary	Adjusted P Value
				0.77	2.19	3.37		WEEK 2 vs. WEEK 4	-0.8943	-1.694 to -0.09401	Yes	*	0.03	A-B
				0.578	1.6	3.21		WEEK 2 vs. WEEK 8	-3.019	-3.819 to -2.219	Yes	****	<0.0001	A-C
								WEEK 4 vs. WEEK 8	-2.125	-2.925 to -1.325	Yes	***	0.0001	B-C
								Test details	Mean 1	Mean 2	Mean Diff.	SE of diff.	n1	n2	q	DF
								WEEK 2 vs. WEEK 4	0.6533	1.548	-0.8943	0.2866	4	4	4.412	9
								WEEK 2 vs. WEEK 8	0.6533	3.673	-3.019	0.2866	4	4	14.9	9
								WEEK 4 vs. WEEK 8	1.548	3.673	-2.125	0.2866	4	4	10.48	9
