# Supplementary material for: PPARγ mediated enhanced lipid biogenesis fuels Mycobacterium tuberculosis growth in a drug-tolerant hepatocyte environment
Source: eLife. 2025 Dec 8;14:RP103817. doi: 10.7554/eLife.103817 (PMC12685304; doi:10.7554/eLife.103817)
Supplement: Figure 6—source data 4. [file elife-103817-fig6-data4.xlsx]

## Sheet: Figure 6-Source data 4
	Values used for Western blot quantification (Figure 6D)
										Statistical parameters for Figure 6D
										5h UI vs 5h I			24 h UI vs 24 h I			48h UI vs 48 h I
		5h UI	5h I	24h UI	24h I	48h UI	48h I			P value	0.0003		P value	0.001		P value	0.0012
		1	1.23707	1	1.64	1	2.30841			P value summary	***		P value summary	***		P value summary	**
		1	1.3	1	1.53	1	2.01			Significantly different (P < 0.05)?	Yes		Significantly different (P < 0.05)?	Yes		Significantly different (P < 0.05)?	Yes
		1	1.23	1	1.79	1	1.8			One- or two-tailed P value?	Two-tailed		One- or two-tailed P value?	Two-tailed		One- or two-tailed P value?	Two-tailed
										t, df	t=11.49, df=4		t, df	t=8.671, df=4		t, df	t=7.047, df=4
