# Supplementary material for: PPARγ mediated enhanced lipid biogenesis fuels Mycobacterium tuberculosis growth in a drug-tolerant hepatocyte environment
Source: eLife. 2025 Dec 8;14:RP103817. doi: 10.7554/eLife.103817 (PMC12685304; doi:10.7554/eLife.103817)
Supplement: Figure 6—source data 5. [file elife-103817-fig6-data5.xlsx]

## Sheet: Figure 6-Source data 5
Mean fluorescent intensity/ cell-Figure 6F
		MFI/cell of mCherry-MTB	DMSO	GW9662	Rosiglitazone			Statistical parameters for Figure6F
			2824.33	1089.76	4944.1			Test details	Mean 1	Mean 2	Mean Diff.	SE of diff.	n1	n2	q	DF
			1025.54	456.362	1803.4			DMSO vs. GW9662	2021	340	1681	359.3	20	20	6.616	57
			545.56	241.156	1995.58			DMSO vs. Rosiglitazone	2021	3019	-998.3	359.3	20	20	3.929	57
			4583.55	576.14	936.04			GW9662 vs. Rosiglitazone	340	3019	-2679	359.3	20	20	10.54	57
			5179.94	635.23	4975.7
			1477.19	562.035	2401.34			Tukey's multiple comparisons test	Mean Diff.	95.00% CI of diff.	Below threshold?	Summary	Adjusted P Value
			1060.2	275.456	4656.6			DMSO vs. GW9662	1681	816.3 to 2546	Yes	****	<0.0001	A-B
			1572.08	687.105	2803.76			DMSO vs. Rosiglitazone	-998.3	-1863 to -133.6	Yes	*	0.0199	A-C
			1055.64	258.799	6323.24			GW9662 vs. Rosiglitazone	-2679	-3544 to -1815	Yes	****	<0.0001	B-C
			1031.42	219.138	3007.24
			602.271	225.463	1494.05
			1957.17	102.847	2704.63
			719.247	48.707	3060.97
			2133.26	71.1128	1965.89
			2308.52	155.343	3215.24
			1765.88	166.446	3874.69
			1776.34	471.957	1482.85
			2134.76	189.567	2004.63
			2453.93	213.576	4652.94
			4212.3	153.38	2081.42
