# Supplementary material for: PPARγ mediated enhanced lipid biogenesis fuels Mycobacterium tuberculosis growth in a drug-tolerant hepatocyte environment
Source: eLife. 2025 Dec 8;14:RP103817. doi: 10.7554/eLife.103817 (PMC12685304; doi:10.7554/eLife.103817)
Supplement: Figure 6—source data 6. [file elife-103817-fig6-data6.xlsx]

## Sheet: Figure 6-Source data 6
	Number of lipid droplets/cell- Figure 6H
				uninfected	Infected	Infected+GW9662	Infected+rosiglitazone
				14	35	15	85		Statistical parameters for Figure 8H
				13	30	19	70		Tukey's multiple comparisons test	Mean Diff.	95.00% CI of diff.	Below threshold?	Summary	Adjusted P Value
				2	27.6	14	72		uninfected vs. Infected	-21.42	-27.92 to -14.93	Yes	****	<0.0001
				9	30	13	70		uninfected vs. Infected+GW9662	-6.4	-12.90 to 0.09510	No	ns	0.0549
				8	40	14	80		uninfected vs. Infected+rosiglitazone	-60.87	-67.36 to -54.37	Yes	****	<0.0001
				6	25	25	75		Infected vs. Infected+GW9662	15.02	8.530 to 21.52	Yes	****	<0.0001
				5	32.54	18	81		Infected vs. Infected+rosiglitazone	-39.44	-45.94 to -32.95	Yes	****	<0.0001
				6	30.23	16	80		Infected+GW9662 vs. Infected+rosiglitazone	-54.47	-60.96 to -47.97	Yes	****	<0.0001
				4	29	19	70
				10	32	7	65		Test details	Mean 1	Mean 2	Mean Diff.	SE of diff.	n1	n2	q	DF
				12	26	14	65		uninfected vs. Infected	9.267	30.69	-21.42	2.453	15	15	12.35	56
				14	30	14	72		uninfected vs. Infected+GW9662	9.267	15.67	-6.4	2.453	15	15	3.69	56
				15	35	15	76		uninfected vs. Infected+rosiglitazone	9.267	70.13	-60.87	2.453	15	15	35.09	56
				12	30	13	45		Infected vs. Infected+GW9662	30.69	15.67	15.02	2.453	15	15	8.662	56
				9	28	19	46		Infected vs. Infected+rosiglitazone	30.69	70.13	-39.44	2.453	15	15	22.74	56
									Infected+GW9662 vs. Infected+rosiglitazone	15.67	70.13	-54.47	2.453	15	15	31.4	56
