# Supplementary material for: PPARγ mediated enhanced lipid biogenesis fuels Mycobacterium tuberculosis growth in a drug-tolerant hepatocyte environment
Source: eLife. 2025 Dec 8;14:RP103817. doi: 10.7554/eLife.103817 (PMC12685304; doi:10.7554/eLife.103817)
Supplement: Figure 7—figure supplement 1—source data 1. [file elife-103817-fig7-figsupp1-data1.xlsx]

## Sheet: Fig7-fig supp1-source data 1
	Figure 7-figure supplement 1A
	Fold change of CYP3A4 transcript in the Mtb infected HepG2, the expression in uninfected cells is considered 1												Statistical calculation for CYP3A4 fold change
													Unpaired t test
	CYP3A4												P value	0.0003
	4.12												P value summary	***
	4.5												Significantly different (P < 0.05)?	Yes
	6.4												One- or two-tailed P value?	Two-tailed
	4.33												t, df	t=7.287, df=6
	Fold change of CYP3A43 transcript in the Mtb infected HepG2, the expression in uninfected cells is considered 1												Statistical calculation for CYP3A43 fold change
	Fold change of CYP3A4 transcript in the Mtb infected HepG2, the expression in uninfected cells is considered 2												Statistical calculation for CYP3A4 fold change
													Unpaired t test
	CYP3A5												P value	1.0003
	5.47												P value summary	***
	5.723												Significantly different (P < 0.05)?	Yes
	5.976												One- or two-tailed P value?	Two-tailed
	6.229												t, df	t=7.287, df=7
	Fold change of CYP3A43 transcript in the Mtb infected HepG2, the expression in uninfected cells is considered 2												Statistical calculation for CYP3A43 fold change
	Fold change of CYP3A4 transcript in the Mtb infected HepG2, the expression in uninfected cells is considered 3												Statistical calculation for CYP3A4 fold change
													Unpaired t test
	CYP3A6												P value	2.0003
	6.482												P value summary	***
	6.735												Significantly different (P < 0.05)?	Yes
	6.988												One- or two-tailed P value?	Two-tailed
	7.241												t, df	t=7.287, df=8
	Fold change of CYP3A43 transcript in the Mtb infected HepG2, the expression in uninfected cells is considered 3												Statistical calculation for CYP3A43 fold change
	Fold change of CYP3A4 transcript in the Mtb infected HepG2, the expression in uninfected cells is considered 4												Statistical calculation for CYP3A4 fold change
													Unpaired t test
	CYP3A7												P value	3.0003
	7.494												P value summary	***
	7.747												Significantly different (P < 0.05)?	Yes
