# Supplementary material for: PPARγ mediated enhanced lipid biogenesis fuels Mycobacterium tuberculosis growth in a drug-tolerant hepatocyte environment
Source: eLife. 2025 Dec 8;14:RP103817. doi: 10.7554/eLife.103817 (PMC12685304; doi:10.7554/eLife.103817)
Supplement: Figure 7—figure supplement 3—source data 1. [file elife-103817-fig7-figsupp3-data1.xlsx]

## Sheet: Fig7-fig supp3-Source data 1
	Figure 7-figure supplement 3C
	Fold change of Rv1258c transcript in the Mtb derived from rifampicin treated Hepg2, the expression of the transcript in Mtb derived from DMSO treated HepG2 grown is considered to be 1												Statistical calculation for Rv1258c fold change
													Unpaired t test
	Rv1258c												P value	0.4871
	0.88												P value summary	ns
	1.07												Significantly different (P < 0.05)?	No
	1.39474												One- or two-tailed P value?	Two-tailed
													t, df	t=0.7647, df=4
	Fold change of Rv1410 transcript in the Mtb derived from rifampicin treated Hepg2, the expression of the transcript in Mtb derived from DMSO treated HepG2 grown is considered to be 1												Statistical calculation for Rv1410 fold change
	Rv1410												Unpaired t test
	0.5625												P value	0.591
	1.33												P value summary	ns
	0.69255												Significantly different (P < 0.05)?	No
													One- or two-tailed P value?	Two-tailed
													t, df	t=0.5832, df=4
	Fold change of Rv1819c transcript in the Mtb derived from rifampicin treated Hepg2, the expression of the transcript in Mtb derived from DMSO treated HepG2 grown is considered to be 1												Statistical calculation for Rv1819c fold change
	Rv1819c												Unpaired t test
	0.590496												P value	0.1869
	1.06437												P value summary	ns
	0.5946												Significantly different (P < 0.05)?	No
													One- or two-tailed P value?	Two-tailed
													t, df	t=1.591, df=4
	Fold change of AcrA1 transcript in the Mtb isolated from Hepg2, the expression of the transcript in DMEM grown Mtb is considered to be 1												Statistical calculation for AcrA1 fold change
	AcrA1
													Unpaired t test
	1.2												P value	0.1087
	2.4												P value summary	ns
	3.5												Significantly different (P < 0.05)?	No
													One- or two-tailed P value?	Two-tailed
													t, df	t=2.058, df=4
