# Supplementary material for: PPARγ mediated enhanced lipid biogenesis fuels Mycobacterium tuberculosis growth in a drug-tolerant hepatocyte environment
Source: eLife. 2025 Dec 8;14:RP103817. doi: 10.7554/eLife.103817 (PMC12685304; doi:10.7554/eLife.103817)
Supplement: Figure 7—figure supplement 3—source data 2. [file elife-103817-fig7-figsupp3-data2.xlsx]

## Sheet: Fig7-fig supp3-source data2
Figure 7-figure supplement 3D	Fold change of Rv1258c transcript in the Mtb derived from isoniazid treated Hepg2, the expression of the transcript in Mtb derived from DMSO treated HepG2 grown is considered to be 1												Statistical calculation for Rv1258c fold change
													Unpaired t test
	Rv1258c												P value	0.4008
	0.83												P value summary	ns
	1.22123												Significantly different (P < 0.05)?	No
	1.48452												One- or two-tailed P value?	Two-tailed
													t, df	t=0.9392, df=4
	Fold change of Rv1410 transcript in the Mtb derived from isoniazid treated Hepg2, the expression of the transcript in Mtb derived from DMSO treated HepG2 grown is considered to be 1												Statistical calculation for Rv1410 fold change
	Rv1410
	0.632878												Unpaired t test
	0.510506												P value	0.0405
	0.89												P value summary	*
													Significantly different (P < 0.05)?	Yes
													One- or two-tailed P value?	Two-tailed
													t, df	t=2.881, df=4
	Fold change of Rv1819c transcript in the Mtb derived from isoniazid treated Hepg2, the expression of the transcript in Mtb derived from DMSO treated HepG2 grown is considered to be 1												Statistical calculation for Rv1819c fold change
	Rv1819c
	1.4												Unpaired t test
	1.59												P value	0.0013
	1.43												P value summary	**
													Significantly different (P < 0.05)?	Yes
													One- or two-tailed P value?	Two-tailed
													t, df	t=8.026, df=4
