# Supplementary material for: PPARγ mediated enhanced lipid biogenesis fuels Mycobacterium tuberculosis growth in a drug-tolerant hepatocyte environment
Source: eLife. 2025 Dec 8;14:RP103817. doi: 10.7554/eLife.103817 (PMC12685304; doi:10.7554/eLife.103817)
Supplement: Figure 7—source data 1. [file elife-103817-fig7-data1.xlsx]

## Sheet: Figure 7-Source data 1
% tolerance of Mtb in the different concentrations of Rifampicin-Figure 7B
		% Tolerance Rifampicin
		RAW 264.7					PHCs					HepG2
	0.5 μg/ml	10.2564	12.1429	10.9474	11.125	12.2222	21.1765	21.4067	18.2796	20.122	22.1429	32	31.8182	29.4118	31.6667	34.4444
	1 μg/ml	3.84615	3.14286	3.26316	2.3125	1.9	8.23529	9.93884	11.828	9.7561	8.57143	17.6	18.1818	22.2222	19.1667	22.2222
	5 μg/ml	1.15385	2.07143	1.26316	1.625	0.7	3.29412	1.83486	1.82796	0.97561	3.14286	5.2	6.36364	8.23529	5.83333	6.11111
	Statistical parameters for Figure 7B
	Tukey's multiple comparisons test	Mean Diff.	95.00% CI of diff.	Below threshold?	Summary	Adjusted P Value
	0.5 μg/ml
	RAW 264.7 vs. PHCs	-9.287	-11.36 to -7.216	Yes	****	<0.0001
	RAW 264.7 vs. HepG2	-20.53	-22.60 to -18.46	Yes	****	<0.0001
	PHCs vs. HepG2	-11.24	-13.31 to -9.172	Yes	****	<0.0001
	1 μg/ml
	RAW 264.7 vs. PHCs	-6.773	-8.844 to -4.702	Yes	****	<0.0001
	RAW 264.7 vs. HepG2	-16.99	-19.06 to -14.91	Yes	****	<0.0001
	PHCs vs. HepG2	-10.21	-12.28 to -8.142	Yes	****	<0.0001
	5 μg/ml
	RAW 264.7 vs. PHCs	-0.8524	-2.924 to 1.219	No	ns	0.5779
	RAW 264.7 vs. HepG2	-4.986	-7.057 to -2.915	Yes	****	<0.0001
	PHCs vs. HepG2	-4.134	-6.205 to -2.062	Yes	****	<0.0001
	Test details	Mean 1	Mean 2	Mean Diff.	SE of diff.	N1	N2	q	DF
	0.5 μg/ml
	RAW 264.7 vs. PHCs	11.34	20.63	-9.287	0.8473	5	5	15.5	36
	RAW 264.7 vs. HepG2	11.34	31.87	-20.53	0.8473	5	5	34.26	36
	PHCs vs. HepG2	20.63	31.87	-11.24	0.8473	5	5	18.76	36
	1 μg/ml
	RAW 264.7 vs. PHCs	2.893	9.666	-6.773	0.8473	5	5	11.3	36
	RAW 264.7 vs. HepG2	2.893	19.88	-16.99	0.8473	5	5	28.35	36
	PHCs vs. HepG2	9.666	19.88	-10.21	0.8473	5	5	17.04	36
	5 μg/ml
	RAW 264.7 vs. PHCs	1.363	2.215	-0.8524	0.8473	5	5	1.423	36
	RAW 264.7 vs. HepG2	1.363	6.349	-4.986	0.8473	5	5	8.322	36
	PHCs vs. HepG2	2.215	6.349	-4.134	0.8473	5	5	6.899	36
