# Supplementary material for: PPARγ mediated enhanced lipid biogenesis fuels Mycobacterium tuberculosis growth in a drug-tolerant hepatocyte environment
Source: eLife. 2025 Dec 8;14:RP103817. doi: 10.7554/eLife.103817 (PMC12685304; doi:10.7554/eLife.103817)
Supplement: Figure 7—source data 2. [file elife-103817-fig7-data2.xlsx]

## Sheet: Figure 7-Source data 2
% tolerance of Mtb in the different concentrations of Isoniazid-Figure 7C
				% Tolerance isoniazid
				RAW 264.7					PHCs					HepG2
			0.5 μg/ml	8.75	9.23077	9.28571	8.42105	8.88889	17.0588	18.9602	15.5914	19.878	20.0714	27.6	29.0909	22.3529	30	27.1111
			1 μg/ml	5.12821	2.14286	2.94737	2.375	2.5	4.11765	5.8104	6.98925	4.87805	9.71429	13.6	15.9091	16.3399	15.4167	17.3333
			5 μg/ml	1.02564	1.71429	0.863158	0.975	1	1.05882	2.44648	1.6129	1.21951	1.71429	4.4	3.63636	2.99346	2.66667	3.44444
				Statistical parameters for Figure 7C
				0.5 μg/ml
				RAW 264.7 vs. PHCs	-9.397	-11.83 to -6.963	Yes	****	<0.0001
				RAW 264.7 vs. HepG2	-18.32	-20.75 to -15.88	Yes	****	<0.0001
				PHCs vs. HepG2	-8.919	-11.35 to -6.485	Yes	****	<0.0001
				1 μg/ml
				RAW 264.7 vs. PHCs	-3.283	-5.717 to -0.8491	Yes	**	0.0061
				RAW 264.7 vs. HepG2	-12.7	-15.14 to -10.27	Yes	****	<0.0001
				PHCs vs. HepG2	-9.418	-11.85 to -6.984	Yes	****	<0.0001
				5 μg/ml
				RAW 264.7 vs. PHCs	-0.4659	-3.048 to 2.116	No	ns	0.8984
				RAW 264.7 vs. HepG2	-2.284	-4.865 to 0.2981	No	ns	0.0916
				PHCs vs. HepG2	-1.818	-4.252 to 0.6164	No	ns	0.1755
				Test details	Predicted (LS) mean 1	Predicted (LS) mean 2	Predicted (LS) mean diff.	SE of diff.	N1	N2	q	DF
				0.5 μg/ml
				RAW 264.7 vs. PHCs	8.915	18.31	-9.397	0.9946	5	5	13.36	35
				RAW 264.7 vs. HepG2	8.915	27.23	-18.32	0.9946	5	5	26.04	35
				PHCs vs. HepG2	18.31	27.23	-8.919	0.9946	5	5	12.68	35
				1 μg/ml
				RAW 264.7 vs. PHCs	3.019	6.302	-3.283	0.9946	5	5	4.668	35
				RAW 264.7 vs. HepG2	3.019	15.72	-12.7	0.9946	5	5	18.06	35
				PHCs vs. HepG2	6.302	15.72	-9.418	0.9946	5	5	13.39	35
				5 μg/ml
				RAW 264.7 vs. PHCs	1.145	1.61	-0.4659	1.055	4	5	0.6245	35
				RAW 264.7 vs. HepG2	1.145	3.428	-2.284	1.055	4	5	3.061	35
				PHCs vs. HepG2	1.61	3.428	-1.818	0.9946	5	5	2.585	35
