# Supplementary material for: PPARγ mediated enhanced lipid biogenesis fuels Mycobacterium tuberculosis growth in a drug-tolerant hepatocyte environment
Source: eLife. 2025 Dec 8;14:RP103817. doi: 10.7554/eLife.103817 (PMC12685304; doi:10.7554/eLife.103817)
Supplement: Figure 7—source data 3. [file elife-103817-fig7-data3.xlsx]

## Sheet: Figure 7-Source data 3
	Percentage tolerance of Mtb to rifampicin treatment in the mentioned cells-Figure 7D
							Statistical parameters for figure 7D
	% Tolerance Rifampicin
	BMDMs	PHCs	HepG2				Tukey's multiple comparisons test	Mean Diff.	95.00% CI of diff.	Below threshold?	Summary	Adjusted P Value
	22.6885	48.7434	39.0219				BMDMs vs. PHCs	-22.62	-29.41 to -15.82	Yes	****	<0.0001	A-B
	23.0308	45.8928	51.9218				BMDMs vs. HepG2	-24.12	-30.92 to -17.33	Yes	****	<0.0001	A-C
	15.3544	56.3039	56.1266				PHCs vs. HepG2	-1.506	-8.301 to 5.289	No	ns	0.855	B-C
	19.7942	39.9399	40.6165
	36.0762	63.505	44.7053				Test details	Mean 1	Mean 2	Mean Diff.	SE of diff.	n1	n2	q	DF
	22.2655	28.9431	60.2348				BMDMs vs. PHCs	22.58	45.2	-22.62	2.82	19	19	11.34	54
	33.8616	35.1551	56.379				BMDMs vs. HepG2	22.58	46.71	-24.12	2.82	19	19	12.1	54
	18.058	43.1883	57.9098				PHCs vs. HepG2	45.2	46.71	-1.506	2.82	19	19	0.7552	54
	25.1523	34.2191	56.3612
	19.6454	55.6522	33.4691
	16.6143	28.1311	55.6388
	23.1685	45.3864	41.2776
	27.8159	42.5279	39.1002
	15.9885	49.5466	37.817
	26.1075	61.5667	40.5985
	22.0573	42.6918	42.9164
	15.8175	44.8101	47.8999
	13.9595	55.6849	54.2216
	31.6462	36.9223	31.2031
