# Supplementary material for: PPARγ mediated enhanced lipid biogenesis fuels Mycobacterium tuberculosis growth in a drug-tolerant hepatocyte environment
Source: eLife. 2025 Dec 8;14:RP103817. doi: 10.7554/eLife.103817 (PMC12685304; doi:10.7554/eLife.103817)
Supplement: Figure 7—source data 4. [file elife-103817-fig7-data4.xlsx]

## Sheet: Figure 7-Source data 4
		Percentage tolerance of Mtb towards isoniazid in the mentioned cells-Figure 7E
		% Tolerance Isoniazid						Statistical parameters for figure 7E
		BMDMs	PHCs	HepG2				Tukey's multiple comparisons test	Mean Diff.	95.00% CI of diff.	Below threshold?	Summary	Adjusted P Value
		15.4896	39.5091	31.454				BMDMs vs. PHCs	-21.12	-25.79 to -16.45	Yes	****	<0.0001	A-B
		16.2735	28.8736	40.7405				BMDMs vs. HepG2	-19.39	-24.07 to -14.72	Yes	****	<0.0001	A-C
		11.644	51.9935	43.8937				PHCs vs. HepG2	1.728	-2.944 to 6.401	No	ns	0.6487	B-C
		13.928	29.9099	33.8827
		22.1292	41.7007	47.5563				Test details	Mean 1	Mean 2	Mean Diff.	SE of diff.	n1	n2	q	DF
		14.4779	28.3469	32.2771				BMDMs vs. PHCs	16.86	37.99	-21.12	1.942	20	20	15.38	57
		15.0754	34.3427	38.0034				BMDMs vs. HepG2	16.86	36.26	-19.39	1.942	20	20	14.12	57
		17.9701	30.2542	26.7635				PHCs vs. HepG2	37.99	36.26	1.728	1.942	20	20	1.259	57
		17.258	37.5758	19.089
		18.7771	51.0486	22.9235
		14.4852	32.636	36.0477
		18.5897	44.1176	38.9128
		16.9156	42.6766	40.1206
		17.2583	41.3212	41.1238
		20.915	43.1065	36.4407
		16.796	31.8474	43.9056
		18.128	33.6709	46.893
		13.5444	38.7198	37.3633
		25.0511	42.0354	34.0234
		12.575	36.0341	33.74
