# Supplementary material for: PPARγ mediated enhanced lipid biogenesis fuels Mycobacterium tuberculosis growth in a drug-tolerant hepatocyte environment
Source: eLife. 2025 Dec 8;14:RP103817. doi: 10.7554/eLife.103817 (PMC12685304; doi:10.7554/eLife.103817)
Supplement: Figure 7—source data 5. [file elife-103817-fig7-data5.xlsx]

## Sheet: Figure 7-Source data 5
				Fold change of Nat2 transcript in the Mtb infected mice liver, the expression in uninfected mice is considerd 1												Statistical calculation for Nat2 fold change
																Unpaired t test
				Nat2												P value	0.002
				2.4												P value summary	**
				1.5												Significantly different (P < 0.05)?	Yes
				2.45												One- or two-tailed P value?	Two-tailed
				2.2												t, df	t=5.188, df=6
				Fold change of Slco1b2 transcript in the Mtb infected mice liver, the expression in uninfected mice is considerd 1												Statistical calculation for Slco1b2 fold change
				Slco1b2												Unpaired t test
				2												P value	0.0003
				1.8												P value summary	***
				2.5												Significantly different (P < 0.05)?	Yes
				2.3												One- or two-tailed P value?	Two-tailed
																t, df	t=7.398, df=6
				Fold change of Ces1 transcript in the Mtb infected mice liver, the expression in uninfected mice is considerd 1												Statistical calculation for Ces1 fold change
				Ces1												P value	0.0046
				1.9												P value summary	**
				1.5												Significantly different (P < 0.05)?	Yes
				2.1												One- or two-tailed P value?	Two-tailed
				1.4												t, df	t=4.389, df=6
				Fold change of Ces2 transcript in the Mtb infected mice liver, the expression in uninfected mice is considerd 1												Statistical calculation for Ces2 fold change
				Ces2												P value	0.0041
				1.8												P value summary	**
				2.34												Significantly different (P < 0.05)?	Yes
				1.54												One- or two-tailed P value?	Two-tailed
				2.56												t, df	t=4.498, df=6
				Fold change of Aadac transcript in the Mtb infected mice liver, the expression in uninfected mice is considerd 1												Statistical calculation for Aadac fold change
				Aadac												P value	<0.0001
				2.7												P value summary	****
				3												Significantly different (P < 0.05)?	Yes
				3.3												One- or two-tailed P value?	Two-tailed
				2.89												t, df	t=15.71, df=6
				Fold change of Cyp2e1 transcript in the Mtb infected mice liver, the expression in uninfected mice is considerd 1												Statistical calculation for Cyp2e1 fold change
				Cyp2e1
				2												P value	0.0028
				1.5												P value summary	**
				1.4												Significantly different (P < 0.05)?	Yes
				1.65												One- or two-tailed P value?	Two-tailed
																t, df	t=4.855, df=6
