# Supplementary material for: PPARγ mediated enhanced lipid biogenesis fuels Mycobacterium tuberculosis growth in a drug-tolerant hepatocyte environment
Source: eLife. 2025 Dec 8;14:RP103817. doi: 10.7554/eLife.103817 (PMC12685304; doi:10.7554/eLife.103817)
Supplement: Supplementary file 2. [file elife-103817-supp2.xlsx]

## Sheet: 0 HPI_ DEGs
	baseMean	log2FoldChange	lfcSE	stat	pvalue	padj	symbol	ENTREZID
ENSG00000164190	7260.65	29.7886	3.38338	8.80439	1.32e-18	6.99e-15	NIPBL	25836
ENSG00000118579	432.103	25.8716	3.38346	7.64648	2.07e-14	5.82e-11	MED28	80306
ENSG00000154719	79.2236	21.8467	3.38388	6.4561	1.07e-10	1.01e-07	MRPL39	54148
ENSG00000135899	87.4385	9.98601	2.76309	3.61407	0.00030143	0.00928348	SP110	3431
ENSG00000028528	67.2365	9.60696	2.7508	3.49242	0.000478663	0.0122049	SNX1	6642
ENSG00000157873	53.019	7.11717	2.31502	3.07435	0.00210963	0.0309208	TNFRSF14	8764
ENSG00000249241	32.6081	6.10223	1.17206	5.20642	1.93e-07	4.63e-05	LINC02265	101060498
ENSG00000106028	30.0521	5.85648	1.40925	4.15574	3.24e-05	0.00211641	SSBP1	6742
ENSG00000270923	30.0521	5.85648	1.40925	4.15574	3.24e-05	0.00211641	TAS2R6P	448990
ENSG00000125740	16758	5.66143	0.990894	5.71346	1.11e-08	4.92e-06	FOSB	2354
ENSG00000120738	17601.3	5.43383	0.951775	5.70915	1.14e-08	4.97e-06	EGR1	1958
ENSG00000170345	26309.4	5.24445	0.951437	5.51214	3.54e-08	1.11e-05	FOS	2353
ENSG00000257725	21.3023	5.1614	1.14497	4.50789	6.55e-06	0.000726465	LINC02399	105369891
ENSG00000259884	228.27	4.97989	1.732	2.87522	0.00403748	0.0444207	NR4A1AS	115409980
ENSG00000144339	52.4173	4.75793	0.848381	5.60824	2.04e-08	7.55e-06	TMEFF2	23671
ENSG00000243629	47.8699	4.54736	1.1321	4.01674	5.9e-05	0.00327559	LINC00880	339894
ENSG00000138166	15068.6	4.47186	0.84228	5.30923	1.1e-07	2.95e-05	DUSP5	1847
ENSG00000162771	32.9527	3.81238	1.03689	3.67675	0.00023622	0.00802905	FAM71A	149647
ENSG00000249464	30.5435	3.62207	0.862094	4.20148	2.65e-05	0.00183593	LINC01091	285419
ENSG00000188039	79.9803	3.47761	0.963324	3.61001	0.000306181	0.00938574	NWD1	284434
ENSG00000131069	9286.06	3.46457	0.6119	5.66199	1.5e-08	6.04e-06	ACSS2	55902
ENSG00000167182	890.194	3.41944	0.585652	5.83869	5.26e-09	2.84e-06	SP2	6668
ENSG00000123358	28810.2	3.22614	0.590397	5.46435	4.65e-08	1.37e-05	NR4A1	3164
ENSG00000266780	63.3532	3.21013	1.09032	2.94421	0.00323784	0.039243	MIR4444-2	100846999
ENSG00000177606	3650.05	3.17573	0.619865	5.12326	3e-07	6.57e-05	JUN	3725
ENSG00000241544	45.8604	3.1292	0.839868	3.72583	0.000194675	0.00723552	LINC02029	105374177
ENSG00000200997	650.178	3.04094	0.553885	5.49019	4.01e-08	1.24e-05	RNVU1-34	106480177
ENSG00000115648	171.37	2.98925	0.501085	5.96556	2.44e-09	1.56e-06	MLPH	79083
ENSG00000232010	18.9755	2.88105	0.714035	4.03489	5.46e-05	0.00310659	DNMT3L-AS1	105372833
ENSG00000206579	108.959	2.86464	0.648915	4.4145	1.01e-05	0.000932142	XKR4	114786
ENSG00000089127	1664.97	2.85788	0.886906	3.2223	0.00127165	0.0223797	OAS1	4938
ENSG00000131737	35.7798	2.82745	0.716836	3.94435	8e-05	0.00391722	KRT34	3885
ENSG00000255150	3267.09	2.79424	0.495152	5.64319	1.67e-08	6.48e-06	EID3	493861
ENSG00000081041	449.196	2.74962	0.41952	6.55421	5.59e-11	6.12e-08	CXCL2	2920
ENSG00000234667	21.918	2.68793	0.856144	3.13957	0.00169193	0.0268418	ACTL11P	389120
ENSG00000146676	1448.7	2.59663	0.891257	2.91345	0.00357461	0.041516	PURB	5814
ENSG00000284261	1448.7	2.59663	0.891257	2.91345	0.00357461	0.041516	MIR4657	100616393
ENSG00000201801	185.672	2.55823	0.51771	4.94142	7.76e-07	0.000141321	RNU5E-4P	100873829
ENSG00000162947	44.2989	2.54985	0.633128	4.02738	5.64e-05	0.00316913	LINC01931	150596
ENSG00000104804	80.7289	2.50525	0.62329	4.01939	5.83e-05	0.00325756	TULP2	7288
ENSG00000136244	345.79	2.493	0.607365	4.10462	4.05e-05	0.00249448	IL6	3569
ENSG00000205978	68.3059	2.47737	0.639777	3.87224	0.000107841	0.00477193	NYNRIN	57523
ENSG00000127528	1111.82	2.43385	0.431376	5.64205	1.68e-08	6.48e-06	KLF2	10365
ENSG00000286172	213.666	2.38436	0.496497	4.80237	1.57e-06	0.00025555	RNVU1-8	101447996
ENSG00000139318	3051.69	2.34598	0.432116	5.42905	5.67e-08	1.62e-05	DUSP6	1848
ENSG00000264229	391.421	2.29969	0.435015	5.28645	1.25e-07	3.18e-05	RNU4ATAC	100151683
ENSG00000182796	457.04	2.28094	0.339536	6.71783	1.84e-11	2.39e-08	TMEM198B	440104
ENSG00000222724	595.627	2.27325	0.463357	4.90604	9.29e-07	0.000164769	RNU2-63P	106480225
ENSG00000276027	1052.46	2.2524	0.397747	5.6629	1.49e-08	6.04e-06	RNU12	267010
ENSG00000201558	278.302	2.20377	0.588836	3.74259	0.000182137	0.00687665	RNVU1-6	101954276
ENSG00000253479	21.5761	2.20155	0.633945	3.47278	0.000515104	0.0127272	LINC01603	100505739
ENSG00000243806	26.2128	2.19751	0.717924	3.06092	0.00220656	0.0318658	RPL7P18	100270852
ENSG00000201183	127.148	2.19405	0.46007	4.76896	1.85e-06	0.000292557	RNVU1-3	101954272
ENSG00000199347	254.606	2.19	0.670052	3.2684	0.00108156	0.0203241	RNU5E-1	26829
ENSG00000100225	1726.92	2.18538	0.51057	4.28027	1.87e-05	0.0014489	FBXO7	25793
ENSG00000212248	19.3251	2.18156	0.647404	3.36971	0.000752478	0.0161845	RNU6-750P	106479897
ENSG00000231826	35.5096	2.12286	0.669612	3.17028	0.00152292	0.0250379	LINC01819	102723854
ENSG00000251574	94.6652	2.10384	0.555794	3.78529	0.000153527	0.00606708	LOC105379109	105379109
ENSG00000120875	6781.33	2.08783	0.455446	4.58414	4.56e-06	0.000553797	DUSP4	1846
ENSG00000207501	1840.98	2.06929	0.334185	6.19206	5.94e-10	5.03e-07	RNVU1-14	101954266
ENSG00000121769	471.025	2.04616	0.274258	7.46071	8.61e-14	2.05e-10	FABP3	2170
ENSG00000128016	1880.79	2.04027	0.363706	5.60966	2.03e-08	7.55e-06	ZFP36	7538
ENSG00000171658	487.845	2.03713	0.466255	4.36914	1.25e-05	0.00107315	NMRAL2P	344887
ENSG00000035403	10256.6	2.03043	0.449704	4.51504	6.33e-06	0.000722233	VCL	7414
ENSG00000137193	4541.74	2.02167	0.279709	7.22777	4.91e-13	1.07e-09	PIM1	5292
ENSG00000101132	305.23	2.01853	0.672195	3.0029	0.00267421	0.0355918	PFDN4	5203
ENSG00000125354	1603	2.01564	0.559192	3.60456	0.000312683	0.00944067	SEPTIN6	23157
ENSG00000201699	25.9926	1.99012	0.591647	3.3637	0.000769042	0.0164452	RNVU1-24	106480167
ENSG00000189377	48.8831	1.9864	0.55065	3.60737	0.000309319	0.00942688	CXCL17	284340
ENSG00000199377	609.837	1.98502	0.440475	4.50655	6.59e-06	0.000726465	RNU5F-1	26828
ENSG00000200169	609.837	1.98502	0.440475	4.50655	6.59e-06	0.000726465	RNU5D-1	26830
ENSG00000052802	23649.8	1.98417	0.413646	4.79679	1.61e-06	0.000259552	MSMO1	6307
ENSG00000087074	9615.38	1.9704	0.395372	4.98367	6.24e-07	0.000119499	PPP1R15A	23645
ENSG00000009950	363.424	1.9532	0.596786	3.27286	0.00106465	0.0200692	MLXIPL	51085
ENSG00000235172	34.2824	1.94329	0.439589	4.42068	9.84e-06	0.00091227	LINC01366	257358
ENSG00000188396	251.332	1.94208	0.488135	3.97857	6.93e-05	0.00360958	DYNLT4	343521
ENSG00000237986	73.1952	1.92661	0.49525	3.89018	0.000100168	0.00454741	CELF2-AS2	439950
ENSG00000128050	6460.15	1.90721	0.412168	4.62726	3.71e-06	0.000482362	PAICS	10606
ENSG00000169435	21.4179	1.9027	0.539917	3.52405	0.000424997	0.0112988	RASSF6	166824
ENSG00000162512	1182.26	1.89865	0.627919	3.02372	0.00249691	0.0343931	SDC3	9672
ENSG00000196972	46.5611	1.851	0.468767	3.94866	7.86e-05	0.00388312	SMIM10L2B	644596
ENSG00000179388	34.6503	1.84484	0.549171	3.35931	0.000781368	0.0165467	EGR3	1960
ENSG00000253981	25.6828	1.81504	0.605014	3	0.00269981	0.035604	ALG1L13P	106479038
ENSG00000232656	2345.84	1.81018	0.392481	4.61215	3.99e-06	0.000510115	IDI2-AS1	55853
ENSG00000006747	366.73	1.80492	0.365092	4.94372	7.66e-07	0.000140639	SCIN	85477
ENSG00000169429	418.868	1.79644	0.527339	3.40662	0.000657728	0.0149168	CXCL8	3576
ENSG00000199879	319.221	1.79201	0.449893	3.98319	6.8e-05	0.00358493	RNVU1-22	106481627
ENSG00000233893	70.4541	1.77984	0.515387	3.45341	0.00055354	0.013302	EZR-AS1	101409257
ENSG00000125772	3368.02	1.77557	0.415833	4.2699	1.96e-05	0.00148789	GPCPD1	56261
ENSG00000181847	40.2577	1.77298	0.40352	4.3938	1.11e-05	0.00101135	TIGIT	201633
ENSG00000122877	47.2296	1.76752	0.594327	2.97399	0.00293958	0.0370661	EGR2	1959
ENSG00000186480	38099.7	1.76269	0.401696	4.38811	1.14e-05	0.0010205	INSIG1	3638
ENSG00000142182	34.8819	1.7498	0.563843	3.10335	0.00191342	0.0291821	DNMT3L	29947
ENSG00000145545	4541.94	1.74724	0.375987	4.64708	3.37e-06	0.000453025	SRD5A1	6715
ENSG00000225462	328.574	1.74612	0.424922	4.10928	3.97e-05	0.00246205	FDPSP1	343332
ENSG00000112972	8979.37	1.73376	0.424609	4.08319	4.44e-05	0.00268669	HMGCS1	3157
ENSG00000218739	1821.63	1.73286	0.516112	3.35753	0.000786422	0.0165792	CEBPZOS	100505876
ENSG00000250072	85.6105	1.73059	0.445235	3.88691	0.00010153	0.00459334	SH3TC2-DT	255187
ENSG00000119673	698.918	1.72885	0.509516	3.39313	0.000691	0.0152754	ACOT2	10965
ENSG00000277610	61.8388	1.72575	0.41833	4.12534	3.7e-05	0.00234061	RNVU1-4	101954264
ENSG00000163738	1889.33	1.70949	0.383716	4.45508	8.39e-06	0.000835744	MTHFD2L	441024
ENSG00000182585	1889.33	1.70949	0.383716	4.45508	8.39e-06	0.000835744	EPGN	255324
ENSG00000156384	621.587	1.70597	0.48367	3.52715	0.000420064	0.0112017	SFR1	119392
ENSG00000266554	53.623	1.70407	0.567809	3.00114	0.00268973	0.0355918	LINC01443	400644
ENSG00000250556	81.0374	1.70138	0.559696	3.03983	0.00236709	0.0332864	CCDC34P1	100288584
ENSG00000149809	830.483	1.69947	0.456448	3.72325	0.000196675	0.00728921	TM7SF2	7108
ENSG00000149823	830.483	1.69947	0.456448	3.72325	0.000196675	0.00728921	VPS51	738
ENSG00000067082	9560.02	1.6836	0.420198	4.00669	6.16e-05	0.00337555	KLF6	1316
ENSG00000247746	356.277	1.68135	0.367296	4.57764	4.7e-06	0.000568647	USP51	158880
ENSG00000184574	240.194	1.68123	0.405189	4.14925	3.34e-05	0.00216011	LPAR5	57121
ENSG00000207205	474.961	1.67713	0.280972	5.96902	2.39e-09	1.56e-06	RNVU1-15	101954267
ENSG00000260630	1818.88	1.67354	0.383911	4.35919	1.31e-05	0.00111216	SNAI3-AS1	197187
ENSG00000250033	860.874	1.66893	0.360176	4.63365	3.59e-06	0.000476281	SLC7A11-AS1	641364
ENSG00000230495	329.165	1.66647	0.441305	3.77624	0.000159214	0.00620771	LOC100286962	100286962
ENSG00000224596	32.738	1.66109	0.570148	2.91343	0.00357485	0.041516	ZMIZ1-AS1	283050
ENSG00000143869	144.38	1.65483	0.385155	4.29654	1.73e-05	0.00137945	GDF7	151449
ENSG00000118520	89.9445	1.64963	0.471526	3.49849	0.000467892	0.0120368	ARG1	383
ENSG00000138379	21.4947	1.64832	0.543904	3.03053	0.00244126	0.0339293	MSTN	2660
ENSG00000265142	781.568	1.64539	0.403919	4.07357	4.63e-05	0.00273624	MIR133A1HG	102723167
ENSG00000283927	781.568	1.64539	0.403919	4.07357	4.63e-05	0.00273624	MIR133A1	406922
ENSG00000284453	781.568	1.64539	0.403919	4.07357	4.63e-05	0.00273624	MIR1-2	406905
ENSG00000149527	809.6	1.64198	0.456128	3.59983	0.000318423	0.00948323	PLCH2	9651
ENSG00000079459	20271.9	1.63626	0.362307	4.51623	6.3e-06	0.000722233	FDFT1	2222
ENSG00000227630	168.454	1.62886	0.568982	2.86276	0.00419962	0.0453691	LINC01132	100506810
ENSG00000173846	892.067	1.61857	0.301153	5.37459	7.68e-08	2.14e-05	PLK3	1263
ENSG00000175592	2151.03	1.60774	0.401593	4.00342	6.24e-05	0.00339889	FOSL1	8061
ENSG00000109920	192.818	1.60323	0.433938	3.6946	0.00022023	0.00769484	FNBP4	23360
ENSG00000148346	108.634	1.59245	0.291029	5.47179	4.46e-08	1.34e-05	LCN2	3934
ENSG00000118523	15448.8	1.5902	0.340228	4.67392	2.96e-06	0.000408114	CCN2	1490
ENSG00000166483	16921.1	1.58943	0.386526	4.11209	3.92e-05	0.00243799	WEE1	7465
ENSG00000120437	13691.7	1.5798	0.331879	4.76018	1.93e-06	0.000299321	ACAT2	39
ENSG00000114854	892.425	1.5793	0.554046	2.8505	0.00436512	0.0463165	TNNC1	7134
ENSG00000134184	23.6821	1.57529	0.437052	3.60435	0.000312934	0.00944067	GSTM1	2944
ENSG00000213366	23.6821	1.57529	0.437052	3.60435	0.000312934	0.00944067	GSTM2	2946
ENSG00000102575	54.1268	1.5733	0.495191	3.17716	0.00148726	0.0247311	ACP5	54
ENSG00000199094	57.7138	1.56852	0.52443	2.99091	0.00278148	0.0361269	MIR30C2	407032
ENSG00000207827	57.7138	1.56852	0.52443	2.99091	0.00278148	0.0361269	MIR30A	407029
ENSG00000233237	57.7138	1.56852	0.52443	2.99091	0.00278148	0.0361269	LINC00472	79940
ENSG00000249628	54.5788	1.56613	0.446869	3.50467	0.000457165	0.011864	LINC00942	100292680
ENSG00000127585	716.904	1.55432	0.435381	3.57001	0.000356964	0.0101262	FBXL16	146330
ENSG00000144136	15134.9	1.53847	0.375551	4.09657	4.19e-05	0.00256615	SLC20A1	6574
ENSG00000138376	1982.64	1.53209	0.408797	3.74779	0.000178399	0.00678431	BARD1	580
ENSG00000160285	17727.3	1.51979	0.368794	4.12096	3.77e-05	0.00236844	LSS	4047
ENSG00000119138	3555.91	1.51923	0.39924	3.80531	0.000141629	0.0056999	KLF9	687
ENSG00000196549	301.329	1.51859	0.417329	3.63883	0.000273884	0.00883976	MME	4311
ENSG00000111912	13032.3	1.51693	0.35225	4.30641	1.66e-05	0.00134377	NCOA7	135112
ENSG00000142623	103.619	1.51441	0.38756	3.90755	9.32e-05	0.00433845	PADI1	29943
ENSG00000143543	2492.87	1.50578	0.338387	4.44988	8.59e-06	0.000835744	JTB	10899
ENSG00000143545	2492.87	1.50578	0.338387	4.44988	8.59e-06	0.000835744	RAB13	5872
ENSG00000143570	2492.87	1.50578	0.338387	4.44988	8.59e-06	0.000835744	SLC39A1	27173
ENSG00000160741	2492.87	1.50578	0.338387	4.44988	8.59e-06	0.000835744	CRTC2	200186
ENSG00000198837	2492.87	1.50578	0.338387	4.44988	8.59e-06	0.000835744	DENND4B	9909
ENSG00000276584	2492.87	1.50578	0.338387	4.44988	8.59e-06	0.000835744	MIR6737	102465441
ENSG00000137440	5679.86	1.49868	0.332395	4.50875	6.52e-06	0.000726465	FGFBP1	9982
ENSG00000261729	35.959	1.49463	0.451405	3.31107	0.000929386	0.0183638	GS1-204I12.4	105371653
ENSG00000236345	56.1108	1.48948	0.443783	3.35633	0.000789847	0.0165829	SCAT8	112935969
ENSG00000052749	88.1885	1.48835	0.364923	4.07853	4.53e-05	0.00272201	RRP12	23223
ENSG00000231508	88.1885	1.48835	0.364923	4.07853	4.53e-05	0.00272201	RPL34P20	100271308
ENSG00000151012	21953.4	1.48826	0.400238	3.71844	0.000200455	0.00734629	SLC7A11	23657
ENSG00000242986	36.4335	1.48296	0.488224	3.03746	0.00238584	0.0333866	RPL21P99	100271429
ENSG00000139613	2106.72	1.48221	0.423004	3.50402	0.0004583	0.011864	SMARCC2	6601
ENSG00000132196	4083.8	1.47611	0.353327	4.17776	2.94e-05	0.00196566	HSD17B7	51478
ENSG00000169247	2361.57	1.47507	0.375378	3.92957	8.51e-05	0.00412703	SH3TC2	79628
ENSG00000173401	35.5169	1.46968	0.432198	3.40047	0.000672694	0.0150902	GLIPR1L1	256710
ENSG00000048540	230.132	1.46845	0.397317	3.69592	0.000219093	0.00768584	LMO3	55885
ENSG00000168497	424.493	1.46028	0.420382	3.47369	0.000513358	0.0127246	CAVIN2	8436
ENSG00000243986	373.272	1.45622	0.36569	3.98212	6.83e-05	0.00358493	ENO1P3	100419069
ENSG00000101782	1139.72	1.45258	0.337224	4.30746	1.65e-05	0.00134159	RIOK3	8780
ENSG00000178403	73.6578	1.45128	0.375008	3.86999	0.000108839	0.00479184	NEUROG2	63973
ENSG00000162772	981.132	1.44655	0.408731	3.53913	0.000401442	0.0109159	ATF3	467
ENSG00000173295	432.717	1.44433	0.416951	3.46403	0.000532151	0.0129774	FAM86B3P	286042
ENSG00000270554	66.7421	1.44241	0.344663	4.18499	2.85e-05	0.00193359	EIF3EP4	100422200
ENSG00000197980	275.541	1.43255	0.339929	4.21426	2.51e-05	0.00177245	LEKR1	389170
ENSG00000213719	666.014	1.43218	0.419039	3.41778	0.00063135	0.0145067	CLIC1	1192
ENSG00000213722	666.014	1.43218	0.419039	3.41778	0.00063135	0.0145067	DDAH2	23564
ENSG00000134107	20912.1	1.42384	0.328918	4.32885	1.5e-05	0.00125899	BHLHE40	8553
ENSG00000144485	551.433	1.42315	0.367567	3.87181	0.000108028	0.00477216	HES6	55502
ENSG00000138685	9016.75	1.42222	0.43118	3.29843	0.000972256	0.0188391	FGF2	2247
ENSG00000145375	9016.75	1.42222	0.43118	3.29843	0.000972256	0.0188391	SPATA5	166378
ENSG00000240775	9016.75	1.42222	0.43118	3.29843	0.000972256	0.0188391	RPS26P23	100271107
ENSG00000047634	7791.87	1.41673	0.338301	4.18777	2.82e-05	0.00191501	SCML1	6322
ENSG00000130787	2109.54	1.40736	0.46594	3.02048	0.00252374	0.0345992	HIP1R	9026
ENSG00000182134	1717.3	1.39718	0.315379	4.43016	9.42e-06	0.000893844	TDRKH	11022
ENSG00000124772	39.7285	1.39472	0.476115	2.92938	0.00339635	0.0405277	CPNE5	57699
ENSG00000258667	7909.93	1.39306	0.337517	4.12739	3.67e-05	0.00233117	HIF1A-AS3	105370526
ENSG00000142676	6817.68	1.37858	0.406848	3.38845	0.000702883	0.0154469	RPL11	6135
ENSG00000165115	505.455	1.36952	0.415398	3.2969	0.000977583	0.0188715	KIF27	55582
ENSG00000136826	3604.4	1.35933	0.328451	4.13859	3.49e-05	0.00224739	KLF4	9314
ENSG00000172348	296.533	1.3543	0.340151	3.98146	6.85e-05	0.00358493	RCAN2	10231
ENSG00000130518	9493.97	1.351	0.372375	3.62807	0.000285545	0.00903823	IQCN	80726
ENSG00000130522	9493.97	1.351	0.372375	3.62807	0.000285545	0.00903823	JUND	3727
ENSG00000174521	52.8164	1.33998	0.440223	3.04386	0.00233563	0.0330561	TTC9B	148014
ENSG00000260832	76.6778	1.32902	0.342767	3.87734	0.000105603	0.00470508	LOC101928417	101928417
ENSG00000166634	175.206	1.3273	0.400421	3.31477	0.000917197	0.0182466	SERPINB12	89777
ENSG00000226216	48.4416	1.31701	0.369689	3.56249	0.00036735	0.0103041	RPS12P5	100271053
ENSG00000142583	50.2992	1.31544	0.439371	2.99392	0.00275422	0.0360935	SLC2A5	6518
ENSG00000102452	552.257	1.30903	0.363665	3.59956	0.000318758	0.00948323	NALCN	259232
ENSG00000118503	12622.3	1.30733	0.442689	2.95315	0.00314552	0.0385861	TNFAIP3	7128
ENSG00000236101	96.2725	1.30021	0.353899	3.67397	0.000238812	0.00810663	RAC1P7	100874390
ENSG00000288691	133.173	1.29651	0.35177	3.68568	0.000228097	0.00782388	LOC105377369	105377369
ENSG00000126583	38.1287	1.2949	0.412043	3.14262	0.00167444	0.0266286	PRKCG	5582
ENSG00000163082	194.933	1.29298	0.441978	2.92543	0.00343979	0.0408503	SGPP2	130367
ENSG00000172296	431.683	1.28907	0.375611	3.43191	0.000599339	0.0139668	SPTLC3	55304
ENSG00000247498	1740.2	1.28418	0.380105	3.37848	0.000728879	0.0157934	GPRC5D-AS1	100506314
ENSG00000184227	2155.78	1.28072	0.325776	3.9313	8.45e-05	0.00412076	ACOT1	641371
ENSG00000128607	4488.43	1.277	0.363025	3.51768	0.000435341	0.0115271	KLHDC10	23008
ENSG00000125538	164.201	1.27697	0.382925	3.33477	0.000853688	0.0174733	IL1B	3553
ENSG00000160888	12149.1	1.27605	0.323187	3.94833	7.87e-05	0.00388312	IER2	9592
ENSG00000101255	8575.48	1.27505	0.352496	3.61721	0.0002978	0.00922583	TRIB3	57761
ENSG00000158748	75.1711	1.27492	0.287023	4.44186	8.92e-06	0.000854091	HTR6	3362
ENSG00000186583	36.7268	1.27468	0.414305	3.07666	0.00209332	0.0307997	SPATC1	375686
ENSG00000109846	533.373	1.27386	0.256955	4.95753	7.14e-07	0.00013193	CRYAB	1410
ENSG00000181773	438.898	1.27333	0.299387	4.25311	2.11e-05	0.00157439	GPR3	2827
ENSG00000215644	263.539	1.27188	0.372394	3.41542	0.000636837	0.0145971	GCGR	2642
ENSG00000250412	20.5655	1.2703	0.442307	2.872	0.00407883	0.0447256	KLHL2P1	729249
ENSG00000229794	120.421	1.26915	0.415195	3.05677	0.00223739	0.0321518	MTCYBP32	107075231
ENSG00000175874	770.898	1.26598	0.322203	3.92915	8.52e-05	0.00412703	CREG2	200407
ENSG00000248698	116.334	1.26561	0.340336	3.71871	0.000200245	0.00734629	LINC01085	152742
ENSG00000169710	34361.3	1.26402	0.38717	3.26477	0.00109552	0.0205038	FASN	2194
ENSG00000185420	12555.8	1.25682	0.353749	3.55285	0.000381077	0.0105237	SMYD3	64754
ENSG00000184381	1035.95	1.25395	0.306106	4.09645	4.2e-05	0.00256615	PLA2G6	8398
ENSG00000064961	4510.16	1.25124	0.337746	3.70467	0.000211664	0.00757715	HMG20B	10362
ENSG00000220008	80.2432	1.25002	0.440474	2.83789	0.00454132	0.0474758	LINGO3	645191
ENSG00000167995	2023.74	1.24919	0.423734	2.94805	0.00319785	0.0389562	BEST1	7439
ENSG00000181577	4095.34	1.24547	0.384085	3.2427	0.00118402	0.0214711	C6orf223	221416
ENSG00000116990	303.071	1.2396	0.426835	2.90416	0.00368242	0.0420665	MYCL	4610
ENSG00000208024	151.729	1.23838	0.348318	3.55531	0.000377535	0.0104942	MIR199A2	406977
ENSG00000283844	151.729	1.23838	0.348318	3.55531	0.000377535	0.0104942	MIR214	406996
ENSG00000153234	10211.7	1.23721	0.312385	3.96054	7.48e-05	0.0037913	NR4A2	4929
ENSG00000136235	1906.93	1.23616	0.420608	2.93899	0.00329284	0.0397367	GPNMB	10457
ENSG00000270424	47.4191	1.23576	0.413292	2.99003	0.00278951	0.0361823	PAWRP2	100420535
ENSG00000116194	423.517	1.23085	0.344646	3.57136	0.000355135	0.0101071	ANGPTL1	9068
ENSG00000078018	298.662	1.22925	0.386353	3.18168	0.00146424	0.0245517	MAP2	4133
ENSG00000109991	34.8502	1.22831	0.31475	3.90251	9.52e-05	0.00437172	P2RX3	5024
ENSG00000243137	388.172	1.22525	0.288392	4.24856	2.15e-05	0.00159476	PSG4	5672
ENSG00000229401	22.1902	1.22497	0.394879	3.10213	0.00192131	0.0292772	MIR5689HG	106660610
ENSG00000129354	5640.66	1.2195	0.284954	4.27965	1.87e-05	0.0014489	AP1M2	10053
ENSG00000106733	288.182	1.21581	0.321264	3.78446	0.000154045	0.0060784	NMRK1	54981
ENSG00000143367	12513.4	1.21524	0.304398	3.99227	6.54e-05	0.00351171	TUFT1	7286
ENSG00000207606	12513.4	1.21524	0.304398	3.99227	6.54e-05	0.00351171	MIR554	693139
ENSG00000223861	12513.4	1.21524	0.304398	3.99227	6.54e-05	0.00351171	RPS10P6	729374
ENSG00000226761	67.3811	1.21504	0.315416	3.85219	0.000117065	0.00503361	TAS2R46	259292
ENSG00000130066	10191.8	1.20787	0.22705	5.31986	1.04e-07	2.84e-05	SAT1	6303
ENSG00000004799	2669.74	1.20041	0.338327	3.54807	0.000388062	0.0106626	PDK4	5166
ENSG00000170899	146.62	1.19788	0.376619	3.18061	0.00146963	0.0245938	GSTA4	2941
ENSG00000105048	154.964	1.19604	0.268272	4.4583	8.26e-06	0.000835744	TNNT1	7138
ENSG00000227714	35.807	1.19482	0.375979	3.17789	0.00148352	0.0247049	MTND6P18	106478951
ENSG00000230408	47.2596	1.19407	0.298077	4.00592	6.18e-05	0.00337555	BZW1-AS1	101927795
ENSG00000159231	345.655	1.189	0.306369	3.88093	0.000104058	0.00467547	CBR3	874
ENSG00000113161	33307.9	1.18792	0.288176	4.12221	3.75e-05	0.00236697	HMGCR	3156
ENSG00000123983	42128.9	1.18235	0.376808	3.13781	0.00170213	0.0269547	ACSL3	2181
ENSG00000100292	2094.4	1.17972	0.295428	3.99325	6.52e-05	0.00351171	HMOX1	3162
ENSG00000198467	6910.37	1.17826	0.373197	3.15722	0.00159282	0.0258081	TPM2	7169
ENSG00000185739	122.069	1.17754	0.370919	3.17466	0.0015001	0.0248815	SRL	6345
ENSG00000251432	716.427	1.17552	0.294329	3.99389	6.5e-05	0.00351171	LINC02615	100507487
ENSG00000161243	148.99	1.15988	0.225253	5.14925	2.62e-07	5.97e-05	FBXO27	126433
ENSG00000122435	422.772	1.15553	0.324295	3.5632	0.000366367	0.0102928	TRMT13	54482
ENSG00000101868	2235.72	1.15506	0.305628	3.77931	0.000157266	0.00615919	POLA1	5422
ENSG00000251869	2235.72	1.15506	0.305628	3.77931	0.000157266	0.00615919	SCARNA23	677773
ENSG00000142235	319.918	1.15407	0.239692	4.81481	1.47e-06	0.000244694	LMTK3	114783
ENSG00000168672	2970.07	1.15113	0.317812	3.62204	0.000292291	0.00915451	LRATD2	157638
ENSG00000116668	1199.36	1.14818	0.29045	3.95309	7.71e-05	0.00386324	SWT1	54823
ENSG00000073756	3504.24	1.14752	0.37889	3.02863	0.00245665	0.0340891	PTGS2	5743
ENSG00000144278	8769.62	1.14631	0.326624	3.50959	0.000448799	0.0117191	GALNT13	114805
ENSG00000219547	38.7061	1.14455	0.381221	3.00231	0.00267935	0.0355918	RPL17P25	442232
ENSG00000131389	26243	1.14404	0.319737	3.57808	0.000346126	0.00994782	SLC6A6	6533
ENSG00000237853	66.2053	1.14048	0.363855	3.13445	0.00172179	0.0271308	NFIA-AS1	645030
ENSG00000126861	739.315	1.13819	0.33646	3.38286	0.000717364	0.0156603	OMG	4974
ENSG00000160326	427.76	1.13531	0.351465	3.23021	0.001237	0.0219826	SLC2A6	11182
ENSG00000185813	7351.64	1.13394	0.333023	3.405	0.000661647	0.0149412	PCYT2	5833
ENSG00000206588	5397.73	1.13331	0.245908	4.60868	4.05e-06	0.000515702	RNU1-28P	26866
ENSG00000181804	93.8614	1.13163	0.38708	2.92351	0.00346106	0.0408838	SLC9A9	285195
ENSG00000236882	50.7929	1.13148	0.374079	3.02472	0.00248865	0.0343334	LINC01554	202299
ENSG00000107736	66.2138	1.13032	0.366158	3.08698	0.00202202	0.0301979	CDH23	64072
ENSG00000144426	3367.98	1.12869	0.378416	2.98267	0.00285745	0.0365816	NBEAL1	65065
ENSG00000261652	396.216	1.12723	0.259594	4.34228	1.41e-05	0.00118976	C15orf65	145788
ENSG00000235823	2769.31	1.12677	0.271266	4.15376	3.27e-05	0.00212949	OLMALINC	90271
ENSG00000223409	71.6107	1.126	0.364003	3.09337	0.00197897	0.0297585	RPL17P17	100270943
ENSG00000160752	6695.25	1.122	0.372269	3.01395	0.00257873	0.0349333	FDPS	2224
ENSG00000231615	93.6659	1.12131	0.363889	3.08145	0.00205994	0.0306248	LOC646870	646870
ENSG00000139428	5054.48	1.12087	0.283089	3.95942	7.51e-05	0.0037913	MMAB	326625
ENSG00000200274	5054.48	1.12087	0.283089	3.95942	7.51e-05	0.0037913	RNU4-32P	106479572
ENSG00000119630	62.8581	1.11611	0.255269	4.37229	1.23e-05	0.00107183	PGF	5228
ENSG00000163395	625.368	1.11385	0.320577	3.47452	0.000511775	0.0127246	IGFN1	91156
ENSG00000170955	5083.84	1.1138	0.260668	4.27285	1.93e-05	0.00148069	CAVIN3	112464
ENSG00000182795	297.737	1.11228	0.366257	3.03689	0.00239029	0.0334156	C1orf116	79098
ENSG00000241288	43.3081	1.10587	0.391565	2.82423	0.00473946	0.0486364	LINC02614	101927056
ENSG00000220392	89.5811	1.10449	0.358313	3.08247	0.00205288	0.0305545	FCF1P5	106479045
ENSG00000139323	466.587	1.09719	0.298368	3.6773	0.000235718	0.00802237	POC1B	282809
ENSG00000257594	466.587	1.09719	0.298368	3.6773	0.000235718	0.00802237	GALNT4	8693
ENSG00000259075	466.587	1.09719	0.298368	3.6773	0.000235718	0.00802237	POC1B-GALNT4	100528030
ENSG00000100151	1351.47	1.09568	0.385383	2.84308	0.00446795	0.0470085	PICK1	9463
ENSG00000171189	947.391	1.09259	0.331674	3.29415	0.000987201	0.0189635	GRIK1	2897
ENSG00000103089	198.632	1.08975	0.387291	2.81378	0.00489634	0.0496816	FA2H	79152
ENSG00000189180	4205.76	1.08498	0.342443	3.16836	0.001533	0.0251098	ZNF33A	7581
ENSG00000206737	5408.82	1.08278	0.273249	3.9626	7.41e-05	0.00378482	RNVU1-18	26863
ENSG00000182185	12449.5	1.07983	0.310892	3.47334	0.000514026	0.0127246	RAD51B	5890
ENSG00000234718	106.113	1.07872	0.367605	2.93445	0.0033414	0.0400724	RPL23AP51	100271464
ENSG00000133935	9535.02	1.0786	0.264461	4.07847	4.53e-05	0.00272201	ERG28	11161
ENSG00000169946	369.825	1.07621	0.329116	3.27	0.00107547	0.0202587	ZFPM2	23414
ENSG00000186001	1874.26	1.0754	0.372892	2.88395	0.00392718	0.0436094	LRCH3	84859
ENSG00000073350	5746.94	1.07076	0.249828	4.28598	1.82e-05	0.00143061	LLGL2	3993
ENSG00000093144	867.93	1.06889	0.365507	2.9244	0.0034512	0.0408838	ECHDC1	55862
ENSG00000248538	25.6766	1.06854	0.359485	2.97242	0.00295465	0.0372025	LOC157273	157273
ENSG00000136143	127.326	1.06572	0.303115	3.51591	0.000438255	0.0115692	SUCLA2	8803
ENSG00000260388	127.326	1.06572	0.303115	3.51591	0.000438255	0.0115692	LINC00562	100861549
ENSG00000175793	18546.5	1.0649	0.248732	4.28129	1.86e-05	0.0014489	SFN	2810
ENSG00000206596	25834.6	1.06442	0.250652	4.24662	2.17e-05	0.00160414	RNU1-27P	26865
ENSG00000103150	992.078	1.06241	0.297301	3.57351	0.000352223	0.0100523	MLYCD	23417
ENSG00000140961	992.078	1.06241	0.297301	3.57351	0.000352223	0.0100523	OSGIN1	29948
ENSG00000230989	992.078	1.06241	0.297301	3.57351	0.000352223	0.0100523	HSBP1	3281
ENSG00000104549	36435.6	1.06163	0.253831	4.18242	2.88e-05	0.0019465	SQLE	6713
ENSG00000125148	18066.8	1.06156	0.147494	7.19726	6.14e-13	1.24e-09	MT2A	4502
ENSG00000259163	44.5423	1.06031	0.335867	3.15694	0.00159432	0.0258081	LOC101928909	101928909
ENSG00000203737	274.563	1.05746	0.336651	3.14111	0.00168307	0.0267335	GPR52	9293
ENSG00000131263	4044.3	1.05574	0.287676	3.66989	0.000242654	0.00819464	RLIM	51132
ENSG00000207513	7923.41	1.05557	0.271152	3.89289	9.91e-05	0.00450474	RNU1-3	26869
ENSG00000206652	7976.95	1.05311	0.272323	3.86716	0.000110112	0.0048262	RNU1-1	26871
ENSG00000110921	6978.84	1.0522	0.296175	3.55263	0.000381405	0.0105237	MVK	4598
ENSG00000207389	40321.9	1.05109	0.247756	4.24244	2.21e-05	0.00162972	RNU1-4	6060
ENSG00000067798	951.78	1.0501	0.322775	3.25335	0.00114053	0.0210609	NAV3	89795
ENSG00000135116	378.164	1.04868	0.333037	3.14883	0.00163928	0.0262897	HRK	8739
ENSG00000280997	58.5828	1.04857	0.347794	3.01493	0.0025704	0.0348745	CCAT2	101805488
ENSG00000145945	72.1326	1.04821	0.330285	3.17365	0.00150537	0.0249271	FAM50B	26240
ENSG00000130203	67.8367	1.04788	0.308452	3.39721	0.000680756	0.0152006	APOE	348
ENSG00000130208	67.8367	1.04788	0.308452	3.39721	0.000680756	0.0152006	APOC1	341
ENSG00000172409	142.819	1.04541	0.348009	3.00398	0.00266474	0.0355299	CLP1	10978
ENSG00000207005	39789.2	1.04483	0.248195	4.20971	2.56e-05	0.00179876	RNU1-2	26870
ENSG00000167895	33.4323	1.04044	0.339697	3.06284	0.00219249	0.03175	TMC8	147138
ENSG00000146233	839.225	1.0398	0.231504	4.49151	7.07e-06	0.000748852	CYP39A1	51302
ENSG00000225434	485.928	1.03676	0.314484	3.29671	0.000978245	0.0188715	LINC01504	100507540
ENSG00000200070	24.7452	1.03566	0.358249	2.89089	0.00384157	0.0433375	RNU4-80P	106480386
ENSG00000173281	1343.78	1.03245	0.285203	3.62005	0.00029455	0.00915758	PPP1R3B	79660
ENSG00000165046	587.642	1.03199	0.275576	3.74484	0.00018051	0.00684477	LETM2	137994
ENSG00000206585	5053.68	1.02535	0.266377	3.84925	0.000118479	0.00506059	RNVU1-7	26864
ENSG00000171223	13806.4	1.02254	0.250792	4.07724	4.56e-05	0.00273019	JUNB	3726
ENSG00000130513	9670.28	1.02092	0.242746	4.20571	2.6e-05	0.00181148	GDF15	9518
ENSG00000185046	273.015	1.02091	0.337751	3.02268	0.00250547	0.0344388	ANKS1B	56899
ENSG00000184828	77.2466	1.01607	0.302869	3.35482	0.000794166	0.0166445	ZBTB7C	201501
ENSG00000167720	1458.04	1.01553	0.289362	3.50956	0.000448846	0.0117191	SRR	63826
ENSG00000155903	1746.71	1.01495	0.358212	2.83338	0.00460587	0.0478457	RASA2	5922
ENSG00000177842	1286.57	1.00991	0.350121	2.88445	0.00392104	0.0435598	ZNF620	253639
ENSG00000177873	1286.57	1.00991	0.350121	2.88445	0.00392104	0.0435598	ZNF619	285267
ENSG00000198417	268.426	1.00687	0.267283	3.76708	0.000165171	0.00640192	MT1F	4494
ENSG00000088726	65.1368	1.0063	0.336765	2.98813	0.00280686	0.0363176	TMEM40	55287
ENSG00000155115	3454.24	1.00585	0.254729	3.94871	7.86e-05	0.00388312	GTF3C6	112495
ENSG00000174327	1584.48	1.00346	0.245241	4.09172	4.28e-05	0.0026129	SLC16A13	201232
ENSG00000163683	2614.73	0.999753	0.259284	3.85582	0.00011534	0.00498605	SMIM14	201895
ENSG00000163995	473.053	0.997729	0.215826	4.62283	3.79e-06	0.000489296	ABLIM2	84448
ENSG00000174326	78.4873	0.997388	0.295036	3.38056	0.000723376	0.0157391	SLC16A11	162515
ENSG00000139410	216.542	0.996813	0.310166	3.2138	0.00130991	0.0228841	SDSL	113675
ENSG00000231384	127.581	0.995257	0.337297	2.95068	0.00317073	0.0387337	LOC100420939	100420939
ENSG00000249379	187.439	0.995179	0.341592	2.91335	0.0035757	0.041516	LOC105375095	105375095
ENSG00000090013	2938.37	0.990979	0.19031	5.20719	1.92e-07	4.63e-05	BLVRB	645
ENSG00000108175	3479.99	0.982923	0.314153	3.1288	0.00175521	0.0275458	ZMIZ1	57178
ENSG00000101417	337.486	0.978229	0.296664	3.29743	0.000975724	0.0188537	PXMP4	11264
ENSG00000058085	96.8396	0.973161	0.302907	3.21274	0.00131474	0.0229379	LAMC2	3918
ENSG00000166750	7625.27	0.972273	0.248462	3.91317	9.11e-05	0.00432241	SLFN5	162394
ENSG00000168785	707.028	0.969824	0.270521	3.58502	0.000337046	0.00982678	TSPAN5	10098
ENSG00000104415	71.5578	0.969365	0.268302	3.61297	0.00030271	0.00930107	CCN4	8840
ENSG00000264235	159.605	0.968056	0.218394	4.43262	9.31e-06	0.000888306	MYL12-AS1	104968399
ENSG00000175294	166.679	0.966793	0.164467	5.87833	4.14e-09	2.36e-06	CATSPER1	117144
ENSG00000079337	1021.59	0.96367	0.248561	3.87699	0.000105758	0.00470508	RAPGEF3	10411
ENSG00000100300	585.012	0.963144	0.288512	3.33832	0.000842867	0.0173329	TSPO	706
ENSG00000147383	9482.56	0.959949	0.210308	4.56449	5.01e-06	0.000599944	NSDHL	50814
ENSG00000154153	4641.86	0.957811	0.25776	3.7159	0.000202481	0.00739985	RETREG1	54463
ENSG00000183742	196.435	0.95749	0.287302	3.33269	0.000860098	0.0175054	MACC1	346389
ENSG00000076641	1600.71	0.955642	0.27131	3.52233	0.000427771	0.011361	PAG1	55824
ENSG00000110900	191.72	0.955382	0.276168	3.45943	0.000541326	0.0130916	TSPAN11	441631
ENSG00000151726	717.795	0.952392	0.293491	3.24505	0.00117432	0.0213948	ACSL1	2180
ENSG00000148225	170.065	0.948681	0.283445	3.34696	0.000817019	0.0169743	WDR31	114987
ENSG00000238005	168.34	0.938637	0.332726	2.82105	0.00478666	0.0489868	LOC101927851	101927851
ENSG00000160633	1464.91	0.937059	0.316127	2.96418	0.00303487	0.0376675	SAFB	6294
ENSG00000108946	11074.8	0.936555	0.161404	5.80257	6.53e-09	3.17e-06	PRKAR1A	5573
ENSG00000141337	11074.8	0.936555	0.161404	5.80257	6.53e-09	3.17e-06	ARSG	22901
ENSG00000169252	1697.49	0.935306	0.239217	3.90987	9.23e-05	0.00433479	ADRB2	154
ENSG00000166578	273.118	0.934657	0.303421	3.0804	0.00206723	0.0306937	IQCD	115811
ENSG00000229456	200.302	0.929445	0.276694	3.35911	0.000781932	0.0165467	RLIMP1	100533695
ENSG00000137962	8542.99	0.927542	0.276359	3.3563	0.000789933	0.0165829	ARHGAP29	9411
ENSG00000196338	195.812	0.926842	0.281217	3.29583	0.000981315	0.0188919	NLGN3	54413
ENSG00000104432	228.003	0.923596	0.2654	3.48001	0.000501394	0.0125182	IL7	3574
ENSG00000107796	635.55	0.923111	0.284671	3.24273	0.00118391	0.0214711	ACTA2	59
ENSG00000167992	1131.7	0.921127	0.267826	3.43927	0.000583281	0.0137317	VWCE	220001
ENSG00000287978	383.393	0.920375	0.210574	4.37078	1.24e-05	0.00107212	LOC100996756	100996756
ENSG00000100100	190.475	0.917186	0.223395	4.10566	4.03e-05	0.00248915	PIK3IP1	113791
ENSG00000177098	76.0127	0.916995	0.254191	3.6075	0.000309162	0.00942688	SCN4B	6330
ENSG00000105479	47.8179	0.915683	0.295965	3.09389	0.00197551	0.0297574	ODAD1	93233
ENSG00000137752	539.674	0.915293	0.294117	3.112	0.00185823	0.0286317	CASP1	834
ENSG00000204397	539.674	0.915293	0.294117	3.112	0.00185823	0.0286317	CARD16	114769
ENSG00000255221	539.674	0.915293	0.294117	3.112	0.00185823	0.0286317	CARD17	440068
ENSG00000138764	4239.88	0.912374	0.238558	3.82454	0.000131019	0.00537176	CCNG2	901
ENSG00000155792	1782.17	0.912289	0.195688	4.66195	3.13e-06	0.000428068	DEPTOR	64798
ENSG00000122378	9975.24	0.911506	0.202262	4.50655	6.59e-06	0.000726465	PRXL2A	84293
ENSG00000199603	14585.9	0.911067	0.305587	2.98137	0.00286964	0.0366009	RNU6-951P	106481480
ENSG00000227770	14585.9	0.911067	0.305587	2.98137	0.00286964	0.0366009	RPL7P12	100131085
ENSG00000232973	14585.9	0.911067	0.305587	2.98137	0.00286964	0.0366009	CYP1B1-AS1	285154
ENSG00000146006	1872.57	0.910965	0.299504	3.04158	0.00235339	0.0331471	LRRTM2	26045
ENSG00000130612	314.162	0.909878	0.257833	3.52894	0.000417226	0.0111609	CYP2G1P	22952
ENSG00000167578	314.162	0.909878	0.257833	3.52894	0.000417226	0.0111609	RAB4B	53916
ENSG00000261857	314.162	0.909878	0.257833	3.52894	0.000417226	0.0111609	MIA	8190
ENSG00000269858	314.162	0.909878	0.257833	3.52894	0.000417226	0.0111609	EGLN2	112398
ENSG00000164442	7950.7	0.909287	0.267999	3.39287	0.000691636	0.0152765	CITED2	10370
ENSG00000147676	11327.3	0.908426	0.284612	3.19181	0.00141385	0.0240437	MAL2	114569
ENSG00000177511	445.73	0.905847	0.306975	2.95089	0.00316865	0.0387337	ST8SIA3	51046
ENSG00000250479	1384.49	0.905036	0.163946	5.52035	3.38e-08	1.09e-05	CHCHD10	400916
ENSG00000114841	660.062	0.902119	0.29031	3.10743	0.00188721	0.0289592	DNAH1	25981
ENSG00000104870	180.161	0.902051	0.26894	3.3541	0.000796246	0.0166748	FCGRT	2217
ENSG00000267322	698.896	0.901177	0.31551	2.85625	0.00428675	0.0459495	SCARNA17	677769
ENSG00000008441	515.359	0.901103	0.281593	3.20002	0.00137416	0.0235673	NFIX	4784
ENSG00000144824	39847.5	0.900471	0.191274	4.70776	2.5e-06	0.000367144	PHLDB2	90102
ENSG00000240891	39847.5	0.900471	0.191274	4.70776	2.5e-06	0.000367144	PLCXD2	257068
ENSG00000182197	132359	0.898817	0.301024	2.98586	0.00282778	0.0364704	EXT1	2131
ENSG00000228212	1471	0.895724	0.268357	3.33781	0.000844427	0.0173514	OFD1P17	23738
ENSG00000005243	640.43	0.893909	0.234514	3.81176	0.00013798	0.00558735	COPZ2	51226
ENSG00000186687	1309.75	0.893642	0.226095	3.9525	7.73e-05	0.00386553	LYRM7	90624
ENSG00000249618	41.4231	0.892721	0.30205	2.95554	0.00312122	0.0384117	LINC02465	107986313
ENSG00000170989	53.9418	0.892321	0.296244	3.01212	0.00259434	0.0350904	S1PR1	1901
ENSG00000189143	161.291	0.891553	0.260509	3.42235	0.000620834	0.0143152	CLDN4	1364
ENSG00000258130	147.32	0.89109	0.203004	4.38952	1.14e-05	0.0010205	LOC613038	613038
ENSG00000109084	40796.3	0.886067	0.247386	3.58172	0.00034134	0.0098318	TMEM97	27346
ENSG00000198431	64889.2	0.885357	0.251476	3.52065	0.000430491	0.0114102	TXNRD1	7296
ENSG00000140465	284.077	0.881682	0.287419	3.06758	0.00215797	0.0313887	CYP1A1	1543
ENSG00000004777	827.44	0.876692	0.307088	2.85486	0.00430564	0.045951	ARHGAP33	115703
ENSG00000137474	96.2137	0.875733	0.259117	3.37969	0.000725681	0.0157498	MYO7A	4647
ENSG00000104883	130.514	0.873608	0.290974	3.00235	0.00267901	0.0355918	PEX11G	92960
ENSG00000170681	226.685	0.873548	0.157132	5.55932	2.71e-08	9.23e-06	CAVIN4	347273
ENSG00000102805	433.364	0.871701	0.293095	2.97412	0.00293829	0.0370661	CLN5	1203
ENSG00000236051	433.364	0.871701	0.293095	2.97412	0.00293829	0.0370661	MYCBP2-AS1	100874212
ENSG00000187239	5129.23	0.871606	0.249689	3.49077	0.000481632	0.0122256	FNBP1	23048
ENSG00000179397	129.338	0.869516	0.276005	3.15036	0.00163069	0.026219	CATSPERE	257044
ENSG00000187678	903.479	0.869268	0.144139	6.03075	1.63e-09	1.1e-06	SPRY4	81848
ENSG00000128833	4884.88	0.865075	0.209163	4.13588	3.54e-05	0.00226852	MYO5C	55930
ENSG00000048052	988.227	0.861558	0.285985	3.0126	0.00259019	0.0350524	HDAC9	9734
ENSG00000155066	243.666	0.861249	0.304284	2.83041	0.00464889	0.048121	PROM2	150696
ENSG00000162923	71.3164	0.860773	0.260977	3.29827	0.000972827	0.0188391	WDR26	80232
ENSG00000266618	71.3164	0.860773	0.260977	3.29827	0.000972827	0.0188391	MIR4742	100616468
ENSG00000139344	469.011	0.855832	0.202809	4.2199	2.44e-05	0.00174278	AMDHD1	144193
ENSG00000117266	1615.97	0.855672	0.264563	3.23428	0.00121948	0.0218873	CDK18	5129
ENSG00000095464	67.3901	0.854531	0.290927	2.93727	0.0033112	0.0398559	PDE6C	5146
ENSG00000102796	198.599	0.852995	0.272164	3.13412	0.0017237	0.0271308	DHRS12	79758
ENSG00000281106	198.599	0.852995	0.272164	3.13412	0.0017237	0.0271308	TMEM272	283521
ENSG00000136854	9358.71	0.852677	0.238677	3.57251	0.000353575	0.0100736	STXBP1	6812
ENSG00000233690	64.6689	0.852098	0.299188	2.84804	0.004399	0.0464623	EBAG9P1	100422254
ENSG00000167799	323.876	0.851508	0.286357	2.97359	0.00294338	0.0370962	NUDT8	254552
ENSG00000128165	537.022	0.851414	0.242429	3.51202	0.000444717	0.0116928	ADM2	79924
ENSG00000152229	2139.13	0.8487	0.253455	3.34852	0.000812439	0.0169328	PSTPIP2	9050
ENSG00000145362	527.253	0.846579	0.299342	2.82813	0.00468206	0.0483324	ANK2	287
ENSG00000225222	7557.76	0.845696	0.289279	2.92346	0.00346161	0.0408838	CHCHD4P5	106479039
ENSG00000164120	631.326	0.84416	0.164587	5.12895	2.91e-07	6.42e-05	HPGD	3248
ENSG00000070540	2422.5	0.843662	0.272483	3.0962	0.00196018	0.0295434	WIPI1	55062
ENSG00000162545	2453.06	0.841921	0.217872	3.86428	0.000111415	0.00486446	CAMK2N1	55450
ENSG00000226237	601.126	0.840476	0.25336	3.31732	0.000908864	0.0181496	GAS1RR	100506834
ENSG00000138798	186.657	0.839708	0.210687	3.98557	6.73e-05	0.003583	EGF	1950
ENSG00000178172	320.353	0.836934	0.264296	3.16665	0.00154206	0.025164	SPINK6	404203
ENSG00000268621	21141.9	0.836128	0.211797	3.94779	7.89e-05	0.00388312	IGFL2-AS1	645553
ENSG00000158987	14867.1	0.834933	0.271754	3.07238	0.00212356	0.0309814	RAPGEF6	51735
ENSG00000217128	14867.1	0.834933	0.271754	3.07238	0.00212356	0.0309814	FNIP1	96459
ENSG00000156453	87.345	0.834548	0.222113	3.75731	0.000171748	0.0065887	PCDH1	5097
ENSG00000111348	528.452	0.833124	0.219254	3.79981	0.000144809	0.00580122	ARHGDIB	397
ENSG00000111875	3526.35	0.832974	0.149813	5.56009	2.7e-08	9.23e-06	ASF1A	25842
ENSG00000284138	173.107	0.831247	0.212643	3.90912	9.26e-05	0.00433845	ATP6V0CP4	112436690
ENSG00000151500	1480.56	0.830345	0.175268	4.73757	2.16e-06	0.000328073	THYN1	29087
ENSG00000133739	1110.2	0.829112	0.183469	4.51908	6.21e-06	0.000717934	LRRCC1	85444
ENSG00000175455	4853.44	0.828635	0.232609	3.56235	0.000367556	0.0103041	CCDC14	64770
ENSG00000099260	2731.39	0.828258	0.238803	3.46837	0.000523631	0.0128292	PALMD	54873
ENSG00000225872	86.6295	0.828085	0.284314	2.91257	0.00358466	0.0415909	LINC01529	644050
ENSG00000104765	12356	0.827405	0.208304	3.9721	7.12e-05	0.00367357	BNIP3L	665
ENSG00000114446	809.423	0.825237	0.158271	5.21407	1.85e-07	4.53e-05	IFT57	55081
ENSG00000224081	335.791	0.819409	0.256175	3.19862	0.00138086	0.0236513	SLC44A3-AS1	101928079
ENSG00000145287	3079.89	0.819061	0.254439	3.21908	0.00128602	0.0225719	PLAC8	51316
ENSG00000071967	8918.37	0.818764	0.247427	3.30912	0.000935901	0.0184729	CYBRD1	79901
ENSG00000250303	388.177	0.81762	0.211137	3.87246	0.000107744	0.00477193	LINC02762	283140
ENSG00000077152	2458.38	0.816276	0.190706	4.28028	1.87e-05	0.0014489	UBE2T	29089
ENSG00000258150	100.097	0.813477	0.202149	4.02414	5.72e-05	0.00319933	LOC388242	388242
ENSG00000244398	8861.41	0.810708	0.231505	3.50191	0.000461937	0.0119034	RPL36AP37	729362
ENSG00000109929	29081.3	0.810011	0.254403	3.18396	0.00145274	0.0244359	SC5D	6309
ENSG00000180964	3688.35	0.806184	0.181139	4.45065	8.56e-06	0.000835744	TCEAL8	90843
ENSG00000109944	401.243	0.805698	0.171731	4.69163	2.71e-06	0.000379335	JHY	79864
ENSG00000282556	355.993	0.803206	0.198011	4.05638	4.98e-05	0.00289978	LOC101927825	101927825
ENSG00000153363	486.75	0.799348	0.245138	3.26081	0.00111094	0.0206893	LINC00467	84791
ENSG00000179476	281.374	0.796777	0.247439	3.22009	0.00128148	0.0225139	C14orf28	122525
ENSG00000143971	2514.82	0.794845	0.221349	3.59091	0.000329523	0.0096719	ETAA1	54465
ENSG00000272767	165.933	0.794361	0.279502	2.84206	0.00448226	0.0471185	JMJD1C-AS1	84989
ENSG00000244921	93.1158	0.791923	0.242306	3.26828	0.00108204	0.0203241	MTCYBP18	107075130
ENSG00000065833	15814	0.791484	0.191835	4.12587	3.69e-05	0.00234061	ME1	4199
ENSG00000142867	3183.88	0.790593	0.194499	4.06477	4.81e-05	0.00280361	BCL10	8915
ENSG00000106823	573.166	0.790569	0.276682	2.85732	0.00427239	0.0459081	ECM2	1842
ENSG00000171388	217.938	0.788751	0.262989	2.99918	0.0027071	0.0356418	APLN	8862
ENSG00000161011	10690.6	0.788058	0.245972	3.20385	0.00135604	0.0234114	SQSTM1	8878
ENSG00000234369	250.262	0.786059	0.220577	3.56365	0.000365734	0.010286	TATDN1P1	728737
ENSG00000137393	3050.1	0.781184	0.230819	3.3844	0.000713341	0.0155984	RNF144B	255488
ENSG00000169715	4794.19	0.777661	0.221803	3.50608	0.000454755	0.0118381	MT1E	4493
ENSG00000185515	8279.8	0.777165	0.276043	2.81538	0.00487203	0.0495128	BRCC3	79184
ENSG00000173681	1746.58	0.776368	0.150226	5.16799	2.37e-07	5.45e-05	BCLAF3	256643
ENSG00000198142	4603.81	0.775478	0.212088	3.65641	0.000255777	0.00843163	SOWAHC	65124
ENSG00000136492	21070	0.774938	0.254007	3.05085	0.00228193	0.0325954	BRIP1	83990
ENSG00000154310	310.808	0.774746	0.190242	4.07243	4.65e-05	0.00273624	TNIK	23043
ENSG00000214145	508.183	0.774554	0.221924	3.49018	0.000482699	0.0122256	LINC00887	100131551
ENSG00000125868	53817.5	0.77406	0.245446	3.15369	0.00161219	0.0260011	DSTN	11034
ENSG00000174501	2259.51	0.773679	0.220319	3.51163	0.000445373	0.0116966	ANKRD36C	400986
ENSG00000108639	3262.2	-0.483412	0.154208	-3.13479	0.00171975	0.0271308	SYNGR2	9144
ENSG00000172508	285.988	-0.484625	0.155867	-3.10923	0.00187574	0.0288508	CARNS1	57571
ENSG00000136908	3944.62	-0.485047	0.1546	-3.13742	0.0017044	0.0269743	DPM2	8818
ENSG00000132522	4311	-0.486607	0.149785	-3.24871	0.00115929	0.0212132	GPS2	2874
ENSG00000215041	4311	-0.486607	0.149785	-3.24871	0.00115929	0.0212132	NEURL4	84461
ENSG00000181409	2465.72	-0.491668	0.107477	-4.57465	4.77e-06	0.000574181	AATK	9625
ENSG00000142798	87301.3	-0.492092	0.108121	-4.55131	5.33e-06	0.00063299	HSPG2	3339
ENSG00000213904	468.048	-0.493857	0.149367	-3.30634	0.00094523	0.0185382	LIPE-AS1	100996307
ENSG00000185024	3948.15	-0.494653	0.156518	-3.16036	0.00157572	0.0256018	BRF1	2972
ENSG00000100767	1481.33	-0.494866	0.126028	-3.92663	8.61e-05	0.00416007	PAPLN	89932
ENSG00000114739	3817.77	-0.495911	0.137242	-3.61341	0.000302191	0.009296	ACVR2B	93
ENSG00000148400	10144.7	-0.497281	0.113681	-4.37435	1.22e-05	0.00106532	NOTCH1	4851
ENSG00000118705	54959.9	-0.498279	0.156783	-3.17815	0.00148216	0.0247049	RPN2	6185
ENSG00000100413	8122.15	-0.498368	0.167804	-2.96995	0.00297851	0.0373238	POLR3H	171568
ENSG00000143641	74635.8	-0.498373	0.165415	-3.01286	0.00258795	0.0350402	GALNT2	2590
ENSG00000184402	10060.2	-0.499466	0.176954	-2.82257	0.00476399	0.04885	SS18L1	26039
ENSG00000140015	2389.61	-0.49951	0.157216	-3.17723	0.00148691	0.0247311	KCNH5	27133
ENSG00000148411	12757	-0.500962	0.154686	-3.23856	0.00120133	0.0216801	NACC2	138151
ENSG00000123384	65683.7	-0.502929	0.148937	-3.37679	0.000733372	0.0158515	LRP1	4035
ENSG00000221365	65683.7	-0.502929	0.148937	-3.37679	0.000733372	0.0158515	MIR1228	100302201
ENSG00000160959	7320.09	-0.504625	0.163126	-3.09347	0.0019783	0.0297585	LRRC14	9684
ENSG00000129351	33882.1	-0.505799	0.167668	-3.01667	0.00255571	0.0347831	ILF3	3609
ENSG00000129353	33882.1	-0.505799	0.167668	-3.01667	0.00255571	0.0347831	SLC44A2	57153
ENSG00000133398	5206.96	-0.507202	0.172505	-2.94021	0.00327985	0.0396058	MED10	84246
ENSG00000103253	1911.69	-0.507974	0.12819	-3.96267	7.41e-05	0.00378482	HAGHL	84264
ENSG00000041988	1283.56	-0.508022	0.152683	-3.32729	0.00087695	0.0176624	THAP3	90326
ENSG00000148297	3328.55	-0.510711	0.153605	-3.32483	0.000884715	0.0177892	MED22	6837
ENSG00000179240	1263.09	-0.513064	0.127166	-4.03459	5.47e-05	0.00310659	GVQW3	100506127
ENSG00000173621	7535.21	-0.5133	0.174948	-2.93401	0.00334612	0.0401107	LRFN4	78999
ENSG00000160401	1119.5	-0.516011	0.129911	-3.97204	7.13e-05	0.00367357	CFAP157	286207
ENSG00000158850	6084.64	-0.517716	0.167068	-3.09884	0.00194283	0.0294055	B4GALT3	8703
ENSG00000213995	4618.18	-0.51971	0.147283	-3.52865	0.000417684	0.0111609	NAXD	55739
ENSG00000253710	5963.81	-0.520511	0.183518	-2.8363	0.00456399	0.0475218	ALG11	440138
ENSG00000253797	5963.81	-0.520511	0.183518	-2.8363	0.00456399	0.0475218	UTP14C	9724
ENSG00000185730	1691.12	-0.522575	0.183354	-2.85009	0.00437062	0.0463361	ZNF696	79943
ENSG00000237017	148.742	-0.524309	0.168932	-3.10367	0.00191133	0.0291759	PRPF31-AS1	121832802
ENSG00000197345	1557.98	-0.525205	0.155284	-3.38223	0.000718987	0.0156797	MRPL21	219927
ENSG00000272620	5617.56	-0.529053	0.147304	-3.59157	0.000328697	0.00966928	AFAP1-AS1	84740
ENSG00000204174	1194.11	-0.530687	0.12447	-4.26357	2.01e-05	0.00151524	NPY4R	5540
ENSG00000100263	5062.89	-0.53166	0.168273	-3.1595	0.00158041	0.025662	RHBDD3	25807
ENSG00000149380	625.485	-0.531965	0.155494	-3.42113	0.00062362	0.0143668	P4HA3	283208
ENSG00000144647	3515.49	-0.533272	0.178238	-2.99192	0.00277232	0.0361269	POMGNT2	84892
ENSG00000083444	33173.3	-0.536069	0.106582	-5.02963	4.91e-07	9.77e-05	PLOD1	5351
ENSG00000072818	749.024	-0.536509	0.169122	-3.17233	0.00151222	0.0249415	ACAP1	9744
ENSG00000127586	5856.1	-0.537174	0.190899	-2.81392	0.00489412	0.0496796	CHTF18	63922
ENSG00000140443	36884.2	-0.539755	0.182073	-2.96449	0.00303181	0.0376501	IGF1R	3480
ENSG00000117318	9932.65	-0.540377	0.163854	-3.29792	0.00097403	0.0188485	ID3	3399
ENSG00000283429	102.934	-0.54156	0.171012	-3.16679	0.00154132	0.025164	MIR1244-3	100422872
ENSG00000116478	1268.06	-0.542335	0.17875	-3.03403	0.00241307	0.0336266	HDAC1	3065
ENSG00000169660	1444.13	-0.54302	0.141239	-3.8447	0.000120699	0.00511656	HEXD	284004
ENSG00000099904	3474.5	-0.544157	0.136373	-3.9902	6.6e-05	0.00353532	ZDHHC8	29801
ENSG00000166860	2074.6	-0.544237	0.160045	-3.40052	0.000672582	0.0150902	ZBTB39	9880
ENSG00000149930	1418.07	-0.545076	0.149988	-3.63413	0.000278917	0.00892536	TAOK2	9344
ENSG00000144749	4197.58	-0.545314	0.149395	-3.65016	0.000262076	0.00859609	LRIG1	26018
ENSG00000203993	3606.69	-0.547356	0.130982	-4.17886	2.93e-05	0.00196113	ARRDC1-AS1	85026
ENSG00000103226	12615.6	-0.548206	0.169673	-3.23096	0.00123376	0.0219826	NOMO3	408050
ENSG00000257381	12615.6	-0.548206	0.169673	-3.23096	0.00123376	0.0219826	MIR3179-2	100422886
ENSG00000178412	229.496	-0.5483	0.16453	-3.33253	0.000860591	0.0175054	LOC284241	284241
ENSG00000130768	412.515	-0.549593	0.13692	-4.01398	5.97e-05	0.0032981	SMPDL3B	27293
ENSG00000160957	21899.1	-0.552315	0.14672	-3.76442	0.000166936	0.00645124	RECQL4	9401
ENSG00000176248	6081.67	-0.55583	0.194515	-2.85752	0.00426964	0.0458973	ANAPC2	29882
ENSG00000168140	4416.34	-0.557791	0.183383	-3.04167	0.00235272	0.0331471	VASN	114990
ENSG00000141294	182.963	-0.557978	0.162702	-3.42946	0.000604784	0.0140418	LRRC46	90506
ENSG00000167470	3528.71	-0.55897	0.167945	-3.3283	0.00087378	0.0176369	MIDN	90007
ENSG00000169696	7256.17	-0.559796	0.168245	-3.32726	0.00087706	0.0176624	ASPSCR1	79058
ENSG00000121281	3397.47	-0.560513	0.15138	-3.7027	0.000213321	0.00760193	ADCY7	113
ENSG00000274969	3397.47	-0.560513	0.15138	-3.7027	0.000213321	0.00760193	MIR6771	102465462
ENSG00000154096	289.735	-0.56102	0.164907	-3.40204	0.000668844	0.015039	THY1	7070
ENSG00000137185	3984.22	-0.561533	0.184779	-3.03895	0.00237402	0.0333125	ZSCAN9	7746
ENSG00000132361	3661.52	-0.566949	0.178725	-3.17219	0.00151295	0.0249415	CLUH	23277
ENSG00000107159	1310.24	-0.567027	0.197403	-2.87243	0.00407327	0.0446834	CA9	768
ENSG00000137642	12003.9	-0.567063	0.140636	-4.03214	5.53e-05	0.00312569	SORL1	6653
ENSG00000182749	2525.21	-0.567409	0.192506	-2.94748	0.0032037	0.038981	PAQR7	164091
ENSG00000109323	5270.67	-0.569238	0.195752	-2.90796	0.00363798	0.0418503	MANBA	4126
ENSG00000230069	5270.67	-0.569238	0.195752	-2.90796	0.00363798	0.0418503	LRRC37A15P	106481796
ENSG00000248971	5270.67	-0.569238	0.195752	-2.90796	0.00363798	0.0418503	KRT8P46	100418744
ENSG00000261924	583.076	-0.572545	0.147579	-3.87959	0.000104634	0.00468909	LOC400627	400627
ENSG00000235173	6686.39	-0.572568	0.16934	-3.38118	0.000721754	0.0157169	HGH1	51236
ENSG00000146477	1016.62	-0.574422	0.17064	-3.36628	0.000761902	0.0163603	SLC22A3	6581
ENSG00000184281	2998.1	-0.574948	0.199322	-2.88452	0.00392011	0.0435598	TSSC4	10078
ENSG00000240418	91.3381	-0.57687	0.19336	-2.9834	0.00285061	0.0365591	RPS2P51	729679
ENSG00000147166	150.557	-0.579968	0.183371	-3.1628	0.00156258	0.0254671	ITGB1BP2	26548
ENSG00000257285	382.004	-0.582377	0.194605	-2.99261	0.00276601	0.0360935	PRMT5-DT	101926933
ENSG00000137216	4689.69	-0.582632	0.201387	-2.8931	0.00381461	0.043128	TMEM63B	55362
ENSG00000167721	143.95	-0.582715	0.206499	-2.82188	0.00477432	0.0488986	TSR1	55720
ENSG00000231609	147.273	-0.583064	0.17623	-3.30855	0.000937812	0.0184746	EHBP1-AS1	100132215
ENSG00000246339	177.699	-0.584831	0.188786	-3.09785	0.00194932	0.0294055	EXTL3-AS1	101929402
ENSG00000230844	700.244	-0.587386	0.19849	-2.95927	0.00308373	0.0380607	ZNF674-AS1	401588
ENSG00000103512	19361.8	-0.587683	0.205844	-2.855	0.00430374	0.045951	NOMO1	23420
ENSG00000072071	1396.91	-0.588281	0.199989	-2.94157	0.00326558	0.0394879	ADGRL1	22859
ENSG00000282458	1699.87	-0.589215	0.13628	-4.32355	1.54e-05	0.00126696	WASH5P	375690
ENSG00000173530	4945.13	-0.589548	0.201453	-2.92647	0.0034283	0.040779	TNFRSF10D	8793
ENSG00000169627	1754.87	-0.589682	0.149131	-3.95412	7.68e-05	0.0038541	BOLA2	552900
ENSG00000103197	2809.86	-0.589843	0.177066	-3.33119	0.000864743	0.0175354	TSC2	7249
ENSG00000218018	155.809	-0.591205	0.195423	-3.02526	0.00248419	0.03429	RBM38-AS1	100291105
ENSG00000179627	514.547	-0.591291	0.159401	-3.70946	0.000207705	0.00749681	ZBTB42	100128927
ENSG00000130304	2067.17	-0.596873	0.194355	-3.07105	0.00213307	0.0310436	SLC27A1	376497
ENSG00000062716	45977.2	-0.596892	0.166648	-3.58176	0.000341284	0.0098318	VMP1	81671
ENSG00000284190	45977.2	-0.596892	0.166648	-3.58176	0.000341284	0.0098318	MIR21	406991
ENSG00000187720	7847.66	-0.59743	0.20115	-2.97006	0.00297738	0.0373238	THSD4	79875
ENSG00000197530	3990.62	-0.598022	0.155902	-3.8359	0.000125107	0.00524091	MIB2	142678
ENSG00000180822	2359.08	-0.59822	0.207822	-2.87852	0.00399541	0.0441059	PSMG4	389362
ENSG00000116574	623.806	-0.600306	0.179655	-3.34143	0.000833468	0.017191	RHOU	58480
ENSG00000145506	472.595	-0.600968	0.185365	-3.24208	0.00118663	0.0214828	NKD2	85409
ENSG00000099625	948.778	-0.601042	0.113286	-5.30555	1.12e-07	2.98e-05	CBARP	255057
ENSG00000144893	392.096	-0.601225	0.202514	-2.96881	0.00298958	0.0373912	MED12L	116931
ENSG00000199994	392.096	-0.601225	0.202514	-2.96881	0.00298958	0.0373912	RNA5SP145	100873412
ENSG00000167971	293.412	-0.605697	0.179476	-3.37482	0.000738653	0.0159394	CASKIN1	57524
ENSG00000175787	471.913	-0.608495	0.16617	-3.66188	0.000250371	0.00835084	ZNF169	169841
ENSG00000198933	511.583	-0.608996	0.189208	-3.21866	0.0012879	0.0225899	TBKBP1	9755
ENSG00000076351	12881.4	-0.611803	0.21181	-2.88846	0.00387138	0.0433609	SLC46A1	113235
ENSG00000228812	569.756	-0.613595	0.133196	-4.60671	4.09e-06	0.000515702	LAMA5-AS1	101928158
ENSG00000236144	2399.8	-0.616358	0.191953	-3.21099	0.0013228	0.023048	TMEM147-AS1	100506469
ENSG00000115353	971.667	-0.621613	0.161785	-3.84223	0.000121924	0.00515182	TACR1	6869
ENSG00000090447	3241.16	-0.621749	0.216292	-2.87458	0.0040457	0.0444552	TFAP4	7023
ENSG00000163257	11657.3	-0.622373	0.174601	-3.56454	0.000364494	0.0102621	DCAF16	54876
ENSG00000064932	6355.17	-0.623086	0.202697	-3.07398	0.00211225	0.0309294	SBNO2	22904
ENSG00000090971	752.579	-0.623679	0.198141	-3.14765	0.00164587	0.0263191	NAT14	57106
ENSG00000197483	752.579	-0.623679	0.198141	-3.14765	0.00164587	0.0263191	ZNF628	89887
ENSG00000215808	917.47	-0.625413	0.180722	-3.46064	0.000538902	0.0130812	LINC01139	339535
ENSG00000161638	13676.6	-0.626145	0.208747	-2.99955	0.00270382	0.0356309	ITGA5	3678
ENSG00000162576	1560.07	-0.626811	0.162422	-3.85916	0.000113776	0.00494285	MXRA8	54587
ENSG00000069424	2671.14	-0.627748	0.176545	-3.55574	0.000376912	0.0104942	KCNAB2	8514
ENSG00000213918	2870.28	-0.629128	0.20449	-3.07656	0.00209401	0.0307997	DNASE1	1773
ENSG00000171246	83902	-0.630955	0.201328	-3.13396	0.00172463	0.0271308	NPTX1	4884
ENSG00000248677	277.502	-0.632491	0.194025	-3.25985	0.00111471	0.02073	LINC02102	100505625
ENSG00000167703	1133.7	-0.632626	0.106644	-5.93212	2.99e-09	1.87e-06	SLC43A2	124935
ENSG00000201302	240.658	-0.634105	0.21515	-2.94727	0.00320592	0.038982	SNORA65	26783
ENSG00000232775	286.377	-0.635013	0.216392	-2.93455	0.0033403	0.0400724	BMS1P22	106480334
ENSG00000059145	4305.67	-0.637895	0.1931	-3.30344	0.000955053	0.0186047	UNKL	64718
ENSG00000141562	228.23	-0.639897	0.223276	-2.86595	0.00415763	0.0452869	NARF	26502
ENSG00000240668	109.159	-0.640374	0.222498	-2.87811	0.00400068	0.0441454	KRT8P36	100418748
ENSG00000185818	1939.93	-0.640401	0.216836	-2.95339	0.00314305	0.0385752	NAT8L	339983
ENSG00000132773	2639.67	-0.641955	0.22726	-2.82476	0.00473157	0.0486267	TOE1	114034
ENSG00000112139	168.928	-0.642355	0.220161	-2.91767	0.00352662	0.0412451	MDGA1	266727
ENSG00000250295	529.03	-0.64305	0.204985	-3.13706	0.00170652	0.0269916	RDH10-AS1	101926926
ENSG00000213468	1668.79	-0.643445	0.202873	-3.17167	0.00151567	0.0249506	FIRRE	286467
ENSG00000162775	287.283	-0.646528	0.21506	-3.00626	0.0026448	0.035441	RBM15	64783
ENSG00000149716	1852.49	-0.649673	0.199132	-3.26253	0.00110421	0.0205932	LTO1	220064
ENSG00000108557	6062	-0.650628	0.21858	-2.97661	0.00291452	0.0369633	RAI1	10743
ENSG00000164638	166.204	-0.651847	0.168167	-3.87619	0.000106105	0.00471101	SLC29A4	222962
ENSG00000232217	69.1057	-0.653744	0.215094	-3.03934	0.00237101	0.033308	FTLP8	100462790
ENSG00000168079	531.591	-0.655038	0.223796	-2.92694	0.0034231	0.0407356	SCARA5	286133
ENSG00000268858	4428.93	-0.656047	0.170447	-3.84899	0.000118608	0.00506059	LOC112268269	112268269
ENSG00000180539	208.221	-0.657422	0.187723	-3.50209	0.000461631	0.0119034	LINC02908	401563
ENSG00000188763	198.104	-0.657809	0.168397	-3.9063	9.37e-05	0.00433845	FZD9	8326
ENSG00000181350	4615.86	-0.657838	0.206668	-3.18307	0.00145723	0.02448	LRRC75A	388341
ENSG00000146674	31816.5	-0.661668	0.217788	-3.03813	0.00238051	0.0333679	IGFBP3	3486
ENSG00000101181	5985.99	-0.663912	0.15491	-4.28578	1.82e-05	0.00143061	MTG2	26164
ENSG00000184675	4472.25	-0.664937	0.225172	-2.95301	0.00314689	0.0385861	AMER1	139285
ENSG00000100836	5920.58	-0.665371	0.173351	-3.8383	0.00012389	0.0052014	PABPN1	8106
ENSG00000129473	5920.58	-0.665371	0.173351	-3.8383	0.00012389	0.0052014	BCL2L2	599
ENSG00000258643	5920.58	-0.665371	0.173351	-3.8383	0.00012389	0.0052014	BCL2L2-PABPN1	100529063
ENSG00000169242	9179.05	-0.666642	0.232653	-2.86539	0.00416494	0.0453071	EFNA1	1942
ENSG00000134569	1425.04	-0.66709	0.199453	-3.34459	0.000824035	0.0170257	LRP4	4038
ENSG00000179886	2798.23	-0.668194	0.156456	-4.27081	1.95e-05	0.00148789	TIGD5	84948
ENSG00000105699	2094.83	-0.669004	0.236249	-2.83178	0.00462899	0.0480326	LSR	51599
ENSG00000185585	15157.3	-0.671241	0.217006	-3.0932	0.00198012	0.0297585	OLFML2A	169611
ENSG00000135637	732.499	-0.671343	0.166203	-4.03929	5.36e-05	0.00306501	CCDC142	84865
ENSG00000204822	732.499	-0.671343	0.166203	-4.03929	5.36e-05	0.00306501	MRPL53	116540
ENSG00000169139	1061.4	-0.672116	0.194643	-3.45306	0.000554263	0.0133064	UBE2V2	7336
ENSG00000103034	1021.58	-0.673308	0.197497	-3.40921	0.000651508	0.0148142	NDRG4	65009
ENSG00000250133	2629.51	-0.679417	0.220814	-3.07687	0.00209183	0.0307997	HOXC-AS2	100874364
ENSG00000250451	2629.51	-0.679417	0.220814	-3.07687	0.00209183	0.0307997	HOXC-AS1	100874363
ENSG00000166166	1712.03	-0.679967	0.203002	-3.34955	0.000809415	0.0168966	TRMT61A	115708
ENSG00000188157	55332.2	-0.681165	0.111926	-6.08582	1.16e-09	8e-07	AGRN	375790
ENSG00000283828	137.464	-0.681282	0.216159	-3.15177	0.00162285	0.0261249	LOC102724474	102724474
ENSG00000114790	122.527	-0.686258	0.235487	-2.91421	0.00356594	0.0415129	ARHGEF26	26084
ENSG00000114554	10826.4	-0.686282	0.220417	-3.11357	0.0018484	0.0286148	PLXNA1	5361
ENSG00000246308	74.4295	-0.686654	0.23844	-2.87977	0.00397961	0.0439879	LOC101928053	101928053
ENSG00000152683	4702.76	-0.688974	0.172789	-3.98738	6.68e-05	0.00357037	SLC30A6	55676
ENSG00000248546	126.132	-0.691469	0.217472	-3.17957	0.00147492	0.0246509	ANP32C	23520
ENSG00000121671	1728.54	-0.691709	0.218215	-3.16985	0.00152516	0.0250379	CRY2	1408
ENSG00000109736	3634.89	-0.6922	0.13901	-4.97949	6.38e-07	0.000120348	MFSD10	10227
ENSG00000104081	1356.62	-0.695103	0.164437	-4.22717	2.37e-05	0.00170131	BMF	90427
ENSG00000284203	1783.33	-0.698366	0.227068	-3.07558	0.00210094	0.0308325	MIR29B2	407025
ENSG00000284214	1783.33	-0.698366	0.227068	-3.07558	0.00210094	0.0308325	MIR29C	407026
ENSG00000164849	287.673	-0.699944	0.217909	-3.2121	0.0013177	0.0229744	GPR146	115330
ENSG00000153404	3236.45	-0.702481	0.222814	-3.15277	0.00161728	0.0260512	PLEKHG4B	153478
ENSG00000196700	7975.88	-0.702639	0.216536	-3.2449	0.00117492	0.0213948	ZNF512B	57473
ENSG00000180846	161.29	-0.704062	0.232815	-3.02413	0.00249351	0.0343824	CSNK1G2-AS1	255193
ENSG00000226167	172.309	-0.706475	0.222637	-3.17322	0.0015076	0.0249271	AP4B1-AS1	100287722
ENSG00000244280	220.111	-0.706667	0.236798	-2.98427	0.0028426	0.0365591	ECEL1P2	347694
ENSG00000172404	245.397	-0.710184	0.2298	-3.09044	0.00199858	0.0299531	DNAJB7	150353
ENSG00000183655	1218.21	-0.714729	0.184355	-3.87691	0.000105793	0.00470508	KLHL25	64410
ENSG00000162931	352.743	-0.716472	0.225805	-3.17297	0.00150889	0.0249289	TRIM17	51127
ENSG00000005007	18537.9	-0.71863	0.240121	-2.99278	0.00276451	0.0360935	UPF1	5976
ENSG00000215912	219.5	-0.720406	0.244619	-2.94501	0.00322944	0.0391954	TTC34	100287898
ENSG00000103335	34733.7	-0.723844	0.198549	-3.64567	0.000266695	0.00869325	PIEZO1	9780
ENSG00000284585	34733.7	-0.723844	0.198549	-3.64567	0.000266695	0.00869325	MIR4722	100616167
ENSG00000280213	1455.17	-0.727775	0.180139	-4.04007	5.34e-05	0.00306501	UCKL1-AS1	100113386
ENSG00000099994	7378.36	-0.728263	0.246253	-2.95738	0.00310264	0.0382581	SUSD2	56241
ENSG00000160472	290.214	-0.72904	0.151922	-4.79877	1.6e-06	0.000258581	TMEM190	147744
ENSG00000120334	504.106	-0.731035	0.240676	-3.03742	0.00238615	0.0333866	CENPL	91687
ENSG00000267226	192.675	-0.732746	0.243028	-3.01507	0.00256924	0.0348745	MALT1-AS1	101927322
ENSG00000198732	51435.7	-0.7336	0.256968	-2.85484	0.0043059	0.045951	SMOC1	64093
ENSG00000100105	5251.63	-0.73973	0.246225	-3.00429	0.00266199	0.0355294	PATZ1	23598
ENSG00000131797	926.856	-0.739767	0.210708	-3.51087	0.000446647	0.0116966	CLUHP3	100132341
ENSG00000167491	7736.2	-0.740245	0.2234	-3.31354	0.000921227	0.0182852	GATAD2A	54815
ENSG00000251151	631.295	-0.742383	0.26269	-2.82608	0.00471209	0.0484883	HOXC-AS3	100874365
ENSG00000141756	31811.2	-0.744267	0.262843	-2.83161	0.00463149	0.0480357	FKBP10	60681
ENSG00000172530	2900.84	-0.744511	0.236662	-3.14589	0.00165584	0.0264129	BANP	54971
ENSG00000158966	3685.16	-0.745866	0.240062	-3.10697	0.00189017	0.0289711	CACHD1	57685
ENSG00000183535	73.9429	-0.747438	0.259555	-2.87969	0.00398066	0.0439879	COL18A1-AS1	378832
ENSG00000112852	845.168	-0.751189	0.187302	-4.01058	6.06e-05	0.00333903	PCDHB2	56133
ENSG00000132622	93.768	-0.751305	0.20014	-3.75389	0.000174111	0.00665989	HSPA12B	116835
ENSG00000101246	4390.41	-0.754102	0.162583	-4.63827	3.51e-06	0.000470357	ARFRP1	10139
ENSG00000215914	106.235	-0.754927	0.236622	-3.19044	0.00142058	0.0241269	MMP23A	8511
ENSG00000269720	2117.95	-0.755988	0.178372	-4.23826	2.25e-05	0.00164649	CCDC194	110806280
ENSG00000131634	111.078	-0.757816	0.266794	-2.84046	0.00450487	0.0471888	TMEM204	79652
ENSG00000149634	89.3026	-0.759078	0.233744	-3.24748	0.00116432	0.0212755	SPATA25	128497
ENSG00000158246	1053	-0.759092	0.231131	-3.28425	0.00102256	0.0194858	TENT5B	115572
ENSG00000006016	1355.74	-0.761513	0.239828	-3.17525	0.00149709	0.0248473	CRLF1	9244
ENSG00000181754	1341.04	-0.76382	0.263627	-2.89735	0.00376332	0.0428006	AMIGO1	57463
ENSG00000169884	1061.58	-0.76409	0.260457	-2.93365	0.00334999	0.0401215	WNT10B	7480
ENSG00000182578	474.767	-0.766286	0.174011	-4.40367	1.06e-05	0.000976519	CSF1R	1436
ENSG00000235204	879.058	-0.766743	0.211849	-3.61929	0.000295412	0.00917351	LOC613206	613206
ENSG00000148468	261.844	-0.767443	0.247221	-3.10428	0.00190742	0.0291501	FAM171A1	221061
ENSG00000171368	4658.27	-0.767593	0.224962	-3.4121	0.000644641	0.0147016	TPPP	11076
ENSG00000112759	3709.14	-0.772696	0.189729	-4.07263	4.65e-05	0.00273624	SLC29A1	2030
ENSG00000197905	1823.59	-0.77288	0.258633	-2.98832	0.00280514	0.0363132	TEAD4	7004
ENSG00000144810	6353.69	-0.774094	0.26216	-2.95275	0.00314954	0.0386007	COL8A1	1295
ENSG00000050555	1630.27	-0.781442	0.20114	-3.88508	0.000102298	0.00461218	LAMC3	10319
ENSG00000169635	515.459	-0.781624	0.271903	-2.87464	0.00404493	0.0444552	HIC2	23119
ENSG00000264462	80009.9	-0.787569	0.150695	-5.22625	1.73e-07	4.28e-05	MIR3648-2	103504731
ENSG00000135362	1261.95	-0.789678	0.265499	-2.97432	0.00293639	0.0370661	PRR5L	79899
ENSG00000180979	178.29	-0.792834	0.261291	-3.03429	0.00241103	0.033616	LRRC57	255252
ENSG00000285942	178.29	-0.792834	0.261291	-3.03429	0.00241103	0.033616	LRRC57	255252
ENSG00000197696	139.583	-0.794508	0.178589	-4.44881	8.63e-06	0.000836089	NMB	4828
ENSG00000137959	824.546	-0.79528	0.216929	-3.66608	0.000246292	0.00825378	IFI44L	10964
ENSG00000137965	824.546	-0.79528	0.216929	-3.66608	0.000246292	0.00825378	IFI44	10561
ENSG00000126814	1047.49	-0.796971	0.26892	-2.9636	0.00304059	0.0376675	TRMT5	57570
ENSG00000147604	13993.8	-0.797159	0.25259	-3.15594	0.00159982	0.0258333	RPL7	6129
ENSG00000276700	2.97063e+06	-0.803347	0.130203	-6.16994	6.83e-10	5.12e-07	RNA5-8SN4	109864274
ENSG00000267191	142.849	-0.804534	0.238022	-3.38009	0.000724621	0.0157473	ZNF45-AS1	118827818
ENSG00000245149	865.425	-0.806462	0.2702	-2.98469	0.00283867	0.0365489	RNF139-DT	101927612
ENSG00000149609	391.425	-0.808844	0.249508	-3.24176	0.00118794	0.0214828	C20orf144	128864
ENSG00000263843	851.393	-0.809397	0.236336	-3.42477	0.000615321	0.0142256	MIF4GD-DT	100287042
ENSG00000096717	1690.67	-0.815703	0.228755	-3.56584	0.000362686	0.0102442	SIRT1	23411
ENSG00000135823	11632.5	-0.816294	0.289422	-2.82043	0.004796	0.0490249	STX6	10228
ENSG00000232586	11632.5	-0.816294	0.289422	-2.82043	0.004796	0.0490249	KIAA1614-AS1	103344928
ENSG00000275708	108814	-0.816839	0.12162	-6.71632	1.86e-11	2.39e-08	MIR3648-1	100500862
ENSG00000105819	479.459	-0.818208	0.140329	-5.83066	5.52e-09	2.84e-06	PMPCB	9512
ENSG00000161057	479.459	-0.818208	0.140329	-5.83066	5.52e-09	2.84e-06	PSMC2	5701
ENSG00000264745	95.2011	-0.82155	0.242019	-3.39457	0.00068737	0.0152144	TTC39C-AS1	102724246
ENSG00000112186	7904.63	-0.83475	0.218449	-3.82126	0.000132772	0.00542669	CAP2	10486
ENSG00000103044	235.193	-0.835499	0.275177	-3.03622	0.00239564	0.0334548	HAS3	3038
ENSG00000037757	1445.73	-0.835994	0.193849	-4.3126	1.61e-05	0.00132306	MRI1	84245
ENSG00000104979	1445.73	-0.835994	0.193849	-4.3126	1.61e-05	0.00132306	C19orf53	28974
ENSG00000114737	131.487	-0.837506	0.225764	-3.70965	0.000207545	0.00749681	CISH	1154
ENSG00000111452	526.754	-0.839771	0.237443	-3.53672	0.000405123	0.0109932	ADGRD1	283383
ENSG00000250746	603.051	-0.841331	0.125252	-6.71711	1.85e-11	2.39e-08	LOC100288073	100288073
ENSG00000095303	10742	-0.841959	0.294739	-2.85663	0.0042817	0.0459495	PTGS1	5742
ENSG00000183605	966.573	-0.848299	0.265935	-3.18988	0.00142333	0.0241579	SFXN4	119559
ENSG00000128652	154.145	-0.850026	0.229378	-3.70579	0.000210732	0.00755412	HOXD3	3232
ENSG00000143740	5246.98	-0.851311	0.284838	-2.98876	0.00280114	0.0363132	SNAP47	116841
ENSG00000135902	378.998	-0.854625	0.150301	-5.68609	1.3e-08	5.5e-06	CHRND	1144
ENSG00000128011	1081.68	-0.85617	0.26088	-3.28185	0.00103128	0.0196093	LRFN1	57622
ENSG00000172215	303.492	-0.858741	0.278209	-3.08667	0.00202411	0.030212	CXCR6	10663
ENSG00000115414	28106.3	-0.859516	0.291419	-2.94942	0.00318372	0.0388381	FN1	2335
ENSG00000196814	197.755	-0.862825	0.283754	-3.04076	0.00235985	0.0332202	MVB12B	89853
ENSG00000260101	78.8879	-0.864666	0.278875	-3.10055	0.00193164	0.0293833	AFTPH-DT	101927402
ENSG00000216031	2446.73	-0.864944	0.261827	-3.3035	0.000954854	0.0186047	MIR298	100126296
ENSG00000235590	2446.73	-0.864944	0.261827	-3.3035	0.000954854	0.0186047	GNAS-AS1	149775
ENSG00000284040	2446.73	-0.864944	0.261827	-3.3035	0.000954854	0.0186047	MIR296	407022
ENSG00000167074	1258.58	-0.868689	0.304349	-2.85426	0.00431377	0.045951	TEF	7008
ENSG00000121406	234.888	-0.870311	0.28841	-3.01762	0.00254767	0.0347831	ZNF549	256051
ENSG00000115318	828.445	-0.870774	0.237838	-3.66121	0.000251029	0.00835084	LOXL3	84695
ENSG00000249715	89.4716	-0.880459	0.296736	-2.96715	0.00300578	0.0374396	FER1L5	90342
ENSG00000227495	100.035	-0.883418	0.311378	-2.83712	0.00455219	0.0475137	KIF1C-AS1	102724009
ENSG00000130382	10495	-0.883474	0.221914	-3.98115	6.86e-05	0.00358493	MLLT1	4298
ENSG00000243224	119.384	-0.884274	0.307836	-2.87255	0.00407178	0.0446834	TWF2-DT	101929054
ENSG00000236499	1184.91	-0.885336	0.238832	-3.70694	0.000209778	0.00753021	LINC00896	150197
ENSG00000134962	331.367	-0.885632	0.275941	-3.2095	0.00132967	0.0231523	KLB	152831
ENSG00000228784	165.385	-0.885839	0.272413	-3.25182	0.00114668	0.0211003	LINC00954	400946
ENSG00000069020	1417.43	-0.886511	0.312875	-2.83344	0.00460503	0.0478457	MAST4	375449
ENSG00000145284	326.844	-0.890804	0.282237	-3.15623	0.00159822	0.0258309	SCD5	79966
ENSG00000108839	364.135	-0.895715	0.227931	-3.92976	8.5e-05	0.00412703	ALOX12	239
ENSG00000140832	256.76	-0.900401	0.293796	-3.06471	0.00217878	0.0315841	MARVELD3	91862
ENSG00000198517	2025.57	-0.90409	0.248313	-3.64094	0.000271648	0.00877839	MAFK	7975
ENSG00000166407	115.469	-0.90448	0.274869	-3.29058	0.000999795	0.0191494	LMO1	4004
ENSG00000244515	88.165	-0.905962	0.237756	-3.81047	0.000138705	0.00560806	KRT18P34	391589
ENSG00000004776	224.737	-0.906278	0.245204	-3.69602	0.000219005	0.00768584	HSPB6	126393
ENSG00000057757	1797.96	-0.906373	0.203107	-4.46255	8.1e-06	0.000833404	PITHD1	57095
ENSG00000227473	233.9	-0.909075	0.187779	-4.84121	1.29e-06	0.000218473	TSSK5P	648630
ENSG00000150510	875.494	-0.911038	0.321211	-2.83626	0.00456453	0.0475218	FAM124A	220108
ENSG00000143217	55.9373	-0.916365	0.269759	-3.39698	0.000681338	0.0152006	NECTIN4	81607
ENSG00000050820	922.492	-0.920852	0.225527	-4.08311	4.44e-05	0.00268669	BCAR1	9564
ENSG00000152377	13765.2	-0.921923	0.188734	-4.88478	1.04e-06	0.000181137	SPOCK1	6695
ENSG00000270006	87.7475	-0.92296	0.321658	-2.86938	0.00411274	0.0449343	C16orf95-DT	101928659
ENSG00000245848	233.127	-0.923775	0.22198	-4.16152	3.16e-05	0.00207528	CEBPA	1050
ENSG00000022840	1094.82	-0.926085	0.156415	-5.9207	3.21e-09	1.91e-06	RNF10	9921
ENSG00000102879	111.981	-0.927837	0.259366	-3.57732	0.000347129	0.00996571	CORO1A	11151
ENSG00000178951	1137.68	-0.930518	0.250239	-3.71852	0.000200395	0.00734629	ZBTB7A	51341
ENSG00000105426	1571.93	-0.93214	0.2829	-3.29495	0.000984396	0.0189235	PTPRS	5802
ENSG00000236423	296.704	-0.933726	0.306006	-3.05133	0.0022783	0.032579	LINC01134	100133612
ENSG00000186765	1377.35	-0.935544	0.187845	-4.98041	6.35e-07	0.000120348	FSCN2	25794
ENSG00000141424	124.005	-0.946775	0.216346	-4.37621	1.21e-05	0.00106532	SLC39A6	25800
ENSG00000173250	94.7977	-0.948785	0.322398	-2.9429	0.0032515	0.0393554	GPR151	134391
ENSG00000070404	10706.1	-0.948971	0.323032	-2.9377	0.00330656	0.0398451	FSTL3	10272
ENSG00000234616	4577.5	-0.950912	0.252593	-3.7646	0.000166816	0.00645124	JRK	8629
ENSG00000236081	3449.14	-0.953066	0.286305	-3.32885	0.00087206	0.0176301	ELFN1-AS1	101927125
ENSG00000171517	88.3828	-0.954808	0.330706	-2.88718	0.00388706	0.0433843	LPAR3	23566
ENSG00000264028	302.159	-0.956587	0.31728	-3.01496	0.00257017	0.0348745	RN7SL744P	106479493
ENSG00000235299	64.2261	-0.957672	0.280677	-3.412	0.000644877	0.0147016	MRPL53P1	359752
ENSG00000243910	100.981	-0.961782	0.335192	-2.86934	0.00411326	0.0449343	TUBA4B	80086
ENSG00000214359	59.935	-0.962278	0.306454	-3.14004	0.00168923	0.0268151	RPL18P10	100271286
ENSG00000133111	1623.32	-0.964898	0.308938	-3.12328	0.0017885	0.0279346	RFXAP	5994
ENSG00000102890	380.527	-0.965156	0.192986	-5.00117	5.7e-07	0.000109947	ELMO3	79767
ENSG00000202198	186.499	-0.966056	0.281739	-3.42891	0.000606017	0.0140418	RN7SK	125050
ENSG00000283293	186.499	-0.966056	0.281739	-3.42891	0.000606017	0.0140418	RN7SK	125050
ENSG00000127507	843.776	-0.970091	0.265547	-3.65319	0.000259005	0.00852316	ADGRE2	30817
ENSG00000259230	226.23	-0.980227	0.167702	-5.84505	5.06e-09	2.83e-06	LINC02323	105370681
ENSG00000196366	348.192	-0.980456	0.192181	-5.10174	3.37e-07	7.18e-05	C9orf163	158055
ENSG00000227964	1157.95	-0.980892	0.203985	-4.80865	1.52e-06	0.000249204	LINC01429	101927678
ENSG00000091947	862.277	-0.98504	0.323632	-3.0437	0.00233686	0.0330561	TMEM101	84336
ENSG00000166106	1494.63	-0.988516	0.277072	-3.56772	0.000360098	0.0101931	ADAMTS15	170689
ENSG00000281832	156.518	-0.989834	0.266814	-3.70983	0.000207402	0.00749681	LINC00602	441177
ENSG00000223923	262.582	-0.990158	0.330116	-2.99942	0.00270491	0.0356309	TNS1-AS1	105373878
ENSG00000110697	2326.14	-0.994776	0.299388	-3.3227	0.000891494	0.0178981	PITPNM1	9600
ENSG00000204946	533.203	-0.994885	0.221689	-4.48775	7.2e-06	0.000750666	ZNF783	100289678
ENSG00000244560	533.203	-0.994885	0.221689	-4.48775	7.2e-06	0.000750666	LOC155060	155060
ENSG00000223764	684.214	-1.0026	0.221152	-4.53353	5.8e-06	0.000682547	LINC02593	100130417
ENSG00000248791	65.0852	-1.00556	0.279494	-3.59777	0.000320955	0.00950548	LOC100422687	100422687
ENSG00000288649	249.485	-1.00772	0.292039	-3.45062	0.000559291	0.0133903	ACTL10	170487
ENSG00000135297	3065.54	-1.00924	0.340593	-2.96319	0.00304469	0.0376675	MTO1	25821
ENSG00000243819	69.3574	-1.00927	0.278322	-3.62626	0.000287557	0.00905823	RN7SL832P	106479524
ENSG00000250722	48.4429	-1.01076	0.3587	-2.81784	0.00483477	0.0492873	SELENOP	6414
ENSG00000102003	143.251	-1.01657	0.309615	-3.28334	0.00102585	0.0195342	SYP	6855
ENSG00000265683	121.609	-1.02319	0.264583	-3.86719	0.000110098	0.0048262	SYPL1P2	100132972
ENSG00000171116	50.5166	-1.0285	0.282245	-3.64399	0.000268441	0.00870692	HSFX1	100506164
ENSG00000159251	1880.48	-1.03522	0.288709	-3.5857	0.00033617	0.00981213	ACTC1	70
ENSG00000162385	788.937	-1.03857	0.254992	-4.07293	4.64e-05	0.00273624	MAGOH	4116
ENSG00000099769	166.387	-1.04283	0.284578	-3.6645	0.000247825	0.00828397	IGFALS	3483
ENSG00000162032	166.387	-1.04283	0.284578	-3.6645	0.000247825	0.00828397	SPSB3	90864
ENSG00000205740	330.957	-1.04568	0.273793	-3.81924	0.000133863	0.00544585	LOC107984285	107984285
ENSG00000234093	84.2617	-1.04688	0.273262	-3.83105	0.000127596	0.00532216	RPS15AP11	644790
ENSG00000245748	122.73	-1.04846	0.351828	-2.98005	0.00288203	0.0366753	LOC100129931	100129931
ENSG00000187634	1838.16	-1.04876	0.226418	-4.63197	3.62e-06	0.0004776	SAMD11	148398
ENSG00000106771	3202.07	-1.05493	0.288406	-3.65778	0.000254408	0.00840171	TMEM245	23731
ENSG00000119326	3202.07	-1.05493	0.288406	-3.65778	0.000254408	0.00840171	CTNNAL1	8727
ENSG00000165716	256.04	-1.05701	0.236233	-4.47444	7.66e-06	0.00079147	DIPK1B	138311
ENSG00000242251	32.0698	-1.06321	0.365346	-2.91013	0.00361273	0.0418099	RN7SL20P	106479232
ENSG00000184507	42.9028	-1.0635	0.363543	-2.92538	0.00344041	0.0408503	NUTM1	256646
ENSG00000169083	259.326	-1.06484	0.334627	-3.18216	0.00146182	0.0245414	AR	367
ENSG00000182325	74.8522	-1.06765	0.28881	-3.69673	0.000218393	0.00768584	FBXL6	26233
ENSG00000261587	74.8522	-1.06765	0.28881	-3.69673	0.000218393	0.00768584	TMEM249	340393
ENSG00000261678	42.384	-1.06779	0.359836	-2.96744	0.00300287	0.0374396	SCRT1	83482
ENSG00000275558	59.7209	-1.07162	0.368378	-2.90902	0.00362561	0.0418229	RN7SKP175	106479173
ENSG00000260927	67.3397	-1.07247	0.321683	-3.33393	0.000856285	0.0174992	LOC101927556	101927556
ENSG00000054179	122.424	-1.07609	0.259374	-4.1488	3.34e-05	0.00216011	ENTPD2	954
ENSG00000153162	11819.5	-1.07782	0.350115	-3.07846	0.00208072	0.0307624	BMP6	654
ENSG00000106070	1119.68	-1.0797	0.338742	-3.18737	0.00143573	0.0242586	GRB10	2887
ENSG00000276255	2017.41	-1.08089	0.280987	-3.84678	0.000119681	0.00509299	LINC02809	100506571
ENSG00000079101	118.134	-1.08425	0.34437	-3.1485	0.0016411	0.0262897	CLUL1	27098
ENSG00000146731	152.879	-1.10113	0.361105	-3.04935	0.00229341	0.032668	CCT6A	908
ENSG00000206603	152.879	-1.10113	0.361105	-3.04935	0.00229341	0.032668	SNORA22B	109616964
ENSG00000207168	152.879	-1.10113	0.361105	-3.04935	0.00229341	0.032668	SNORA15	677803
ENSG00000232037	55.8813	-1.10423	0.297054	-3.71727	0.000201388	0.0073702	RPL21P29	440575
ENSG00000162819	2098.15	-1.10874	0.391608	-2.83125	0.00463661	0.0480508	BROX	148362
ENSG00000119508	2331.36	-1.11199	0.318923	-3.4867	0.00048902	0.0123196	NR4A3	8013
ENSG00000244748	30.035	-1.11936	0.352458	-3.17587	0.0014939	0.0248259	RN7SL153P	106480490
ENSG00000163467	236.292	-1.12378	0.324447	-3.46367	0.000532857	0.0129825	TSACC	128229
ENSG00000188917	1148.12	-1.13173	0.218111	-5.18878	2.12e-07	5.05e-05	TRMT2B	79979
ENSG00000142208	2427.14	-1.13385	0.396331	-2.86088	0.00422474	0.045577	AKT1	207
ENSG00000213970	175.354	-1.13392	0.368646	-3.07591	0.00209861	0.0308325	RPS15P7	100271361
ENSG00000124203	8419.74	-1.13586	0.324168	-3.50392	0.000458465	0.011864	ZNF831	128611
ENSG00000170166	128.833	-1.13716	0.346054	-3.28607	0.00101594	0.01939	HOXD4	3233
ENSG00000101082	119.968	-1.13862	0.401804	-2.83376	0.00460037	0.0478264	SLA2	84174
ENSG00000234319	26.1712	-1.14288	0.37518	-3.04622	0.00231739	0.032905	RPS12P2	619448
ENSG00000240549	129.996	-1.14416	0.298373	-3.83466	0.000125737	0.00525371	THOC7-AS1	100874039
ENSG00000280278	30.4409	-1.1484	0.369667	-3.10657	0.00189271	0.0289928	FLJ30679	146512
ENSG00000154721	106.097	-1.15651	0.331632	-3.48733	0.000487876	0.0123095	JAM2	58494
ENSG00000109452	119.162	-1.15737	0.406287	-2.84864	0.00439064	0.0464408	INPP4B	8821
ENSG00000182376	356.569	-1.16281	0.292599	-3.97408	7.07e-05	0.00365654	LOC339059	339059
ENSG00000137266	1032.38	-1.17495	0.263884	-4.45253	8.49e-06	0.000835744	SLC22A23	63027
ENSG00000173482	4916.12	-1.1782	0.23483	-5.01723	5.24e-07	0.000102655	PTPRM	5797
ENSG00000149115	7244.43	-1.17835	0.415395	-2.8367	0.00455825	0.0475218	TNKS1BP1	85456
ENSG00000280424	308.742	-1.18374	0.340634	-3.47512	0.000510624	0.0127123	LOC730668	730668
ENSG00000065320	689.386	-1.18907	0.394291	-3.01572	0.00256373	0.0348561	NTN1	9423
ENSG00000227759	823.331	-1.19327	0.41854	-2.85102	0.00435792	0.0462775	VTI1BP4	100422540
ENSG00000126231	128.062	-1.19442	0.388899	-3.07128	0.00213143	0.0310371	PROZ	8858
ENSG00000141959	267.391	-1.19683	0.402166	-2.97595	0.00292081	0.0369894	PFKL	5211
ENSG00000256746	50.6378	-1.19701	0.367745	-3.25499	0.00113396	0.0210135	MADD-AS1	101928943
ENSG00000130810	24.6763	-1.19762	0.409819	-2.92231	0.0034745	0.0408838	PPAN	56342
ENSG00000209645	24.6763	-1.19762	0.409819	-2.92231	0.0034745	0.0408838	SNORD105	692229
ENSG00000238531	24.6763	-1.19762	0.409819	-2.92231	0.0034745	0.0408838	SNORD105B	100113382
ENSG00000243207	24.6763	-1.19762	0.409819	-2.92231	0.0034745	0.0408838	PPAN-P2RY11	692312
ENSG00000244165	24.6763	-1.19762	0.409819	-2.92231	0.0034745	0.0408838	P2RY11	5032
ENSG00000076716	706.462	-1.2029	0.402268	-2.9903	0.00278702	0.0361679	GPC4	2239
ENSG00000175097	35.3604	-1.20851	0.332463	-3.63503	0.000277947	0.00891477	RAG2	5897
ENSG00000260778	123.036	-1.20983	0.416445	-2.90514	0.00367094	0.0420014	MIR3677HG	106660606
ENSG00000284346	123.036	-1.20983	0.416445	-2.90514	0.00367094	0.0420014	MIR940	100126328
ENSG00000165271	35.9031	-1.21491	0.358352	-3.39026	0.000698274	0.0153714	NOL6	65083
ENSG00000275651	35.9031	-1.21491	0.358352	-3.39026	0.000698274	0.0153714	MIR6851	102465512
ENSG00000018699	1659.72	-1.21544	0.399096	-3.04549	0.00232299	0.0329665	TTC27	55622
ENSG00000068650	13940.1	-1.21674	0.355509	-3.42252	0.000620431	0.0143152	ATP11A	23250
ENSG00000235138	293.299	-1.22351	0.224639	-5.44656	5.14e-08	1.48e-05	LOC100130548	100130548
ENSG00000142207	5498.04	-1.22652	0.277189	-4.42485	9.65e-06	0.000901212	URB1	9875
ENSG00000159055	5498.04	-1.22652	0.277189	-4.42485	9.65e-06	0.000901212	MIS18A	54069
ENSG00000200792	5498.04	-1.22652	0.277189	-4.42485	9.65e-06	0.000901212	SNORA80A	677846
ENSG00000186019	253.797	-1.23207	0.251533	-4.89824	9.67e-07	0.000170297	LOC100379224	100379224
ENSG00000100146	83.2699	-1.2325	0.262422	-4.69662	2.65e-06	0.000379335	SOX10	6663
ENSG00000149782	4431.32	-1.23306	0.363258	-3.39445	0.000687662	0.0152144	PLCB3	5331
ENSG00000250635	52.5507	-1.23741	0.421531	-2.9355	0.00333007	0.0400463	CXXC5-AS1	111082989
ENSG00000259895	279.07	-1.24382	0.404065	-3.07826	0.0020821	0.0307624	TEDC2-AS1	729652
ENSG00000182831	12948.6	-1.2486	0.28416	-4.394	1.11e-05	0.00101135	C16orf72	29035
ENSG00000259125	39.0899	-1.25184	0.365967	-3.42064	0.000624737	0.0143799	LRP1-AS	105751187
ENSG00000283463	24.5152	-1.26103	0.367512	-3.43126	0.000600782	0.013988	HSFX4	101927685
ENSG00000115211	2041.4	-1.26358	0.385927	-3.27415	0.00105982	0.0200213	EIF2B4	8890
ENSG00000142149	635.346	-1.26523	0.391219	-3.23408	0.00122036	0.021888	HUNK	30811
ENSG00000263412	286.56	-1.26822	0.385729	-3.28786	0.00100952	0.0193166	NFE2L1-DT	116435298
ENSG00000184363	1969.76	-1.27123	0.349081	-3.64165	0.000270893	0.00877559	PKP3	11187
ENSG00000254019	29.296	-1.28119	0.370256	-3.46028	0.00053961	0.0130863	LOC105375787	105375787
ENSG00000177350	23.1443	-1.28249	0.407755	-3.14524	0.0016595	0.0264231	RPL13AP3	645683
ENSG00000118046	2741.24	-1.28546	0.373453	-3.4421	0.000577227	0.0136713	STK11	6794
ENSG00000150893	103.403	-1.28643	0.435838	-2.95162	0.00316109	0.038706	FREM2	341640
ENSG00000182759	118.457	-1.29413	0.408557	-3.16755	0.00153727	0.0251548	MAFA	389692
ENSG00000162526	59.4421	-1.2961	0.414569	-3.12637	0.00176976	0.0277411	TSSK3	81629
ENSG00000122986	26.7236	-1.30017	0.442023	-2.9414	0.00326734	0.039491	HVCN1	84329
ENSG00000106546	6199.06	-1.30202	0.42466	-3.06604	0.00216915	0.0314815	AHR	196
ENSG00000165030	6903.81	-1.30219	0.36191	-3.5981	0.000320554	0.00950434	NFIL3	4783
ENSG00000169071	6903.81	-1.30219	0.36191	-3.5981	0.000320554	0.00950434	ROR2	4920
ENSG00000228149	21.3696	-1.30644	0.426879	-3.06044	0.0022101	0.0318994	RPL3P1	8488
ENSG00000268738	39.4261	-1.31469	0.307902	-4.26983	1.96e-05	0.00148789	HSFX2	100130086
ENSG00000140986	28.6878	-1.31573	0.449907	-2.92444	0.00345078	0.0408838	RPL3L	6123
ENSG00000174917	1034.47	-1.31653	0.3185	-4.13354	3.57e-05	0.00228461	MICOS13	125988
ENSG00000178460	126.777	-1.33042	0.425809	-3.12445	0.00178139	0.0278734	MCMDC2	157777
ENSG00000176749	462.192	-1.33328	0.294549	-4.52651	6e-06	0.000699333	CDK5R1	8851
ENSG00000187553	45.1288	-1.3446	0.441349	-3.04657	0.00231469	0.0328844	CYP26C1	340665
ENSG00000260228	36.2038	-1.34756	0.405184	-3.32581	0.00088163	0.0177408	LOC102724163	102724163
ENSG00000127129	69.3378	-1.35264	0.396141	-3.41454	0.000638906	0.0146036	EDN2	1907
ENSG00000148773	9398.84	-1.35778	0.359631	-3.77548	0.0001597	0.00621742	MKI67	4288
ENSG00000125844	13123.3	-1.3619	0.453396	-3.00377	0.00266653	0.0355357	RRBP1	6238
ENSG00000234327	345.563	-1.38044	0.332628	-4.15009	3.32e-05	0.00215864	ZNF232-AS1	101928000
ENSG00000167588	102.006	-1.38499	0.22251	-6.22439	4.83e-10	4.23e-07	GPD1	2819
ENSG00000188659	75.3951	-1.39241	0.461472	-3.01733	0.00255016	0.0347831	SAXO2	283726
ENSG00000099785	290.517	-1.40286	0.423271	-3.31433	0.000918628	0.0182474	MARCHF2	51257
ENSG00000258471	31.0885	-1.41904	0.396233	-3.58132	0.000341867	0.00983617	LOC101929718	101929718
ENSG00000197182	153.561	-1.42736	0.494129	-2.88864	0.00386908	0.0433609	MIRLET7BHG	400931
ENSG00000266533	153.561	-1.42736	0.494129	-2.88864	0.00386908	0.0433609	MIR3619	100500828
ENSG00000283990	153.561	-1.42736	0.494129	-2.88864	0.00386908	0.0433609	MIRLET7A3	406883
ENSG00000284175	153.561	-1.42736	0.494129	-2.88864	0.00386908	0.0433609	MIR4763	100616143
ENSG00000284520	153.561	-1.42736	0.494129	-2.88864	0.00386908	0.0433609	MIRLET7B	406884
ENSG00000173465	535.17	-1.43065	0.429229	-3.33308	0.000858915	0.0175054	ZNRD2	10534
ENSG00000176973	535.17	-1.43065	0.429229	-3.33308	0.000858915	0.0175054	FAM89B	23625
ENSG00000179314	340.541	-1.43336	0.506823	-2.82812	0.0046822	0.0483324	WSCD1	23302
ENSG00000006611	794.845	-1.44111	0.364705	-3.95142	7.77e-05	0.00386569	USH1C	10083
ENSG00000151655	20.027	-1.45427	0.480703	-3.02531	0.0024838	0.03429	ITIH2	3698
ENSG00000049323	1456.44	-1.4594	0.429819	-3.39539	0.000685303	0.0152006	LTBP1	4052
ENSG00000134516	44.314	-1.46405	0.42534	-3.44207	0.000577281	0.0136713	DOCK2	1794
ENSG00000171798	61.9004	-1.47452	0.388654	-3.79391	0.000148292	0.00593169	KNDC1	85442
ENSG00000179157	26.313	-1.47657	0.399097	-3.69978	0.000215783	0.0076619	RPS2P28	100132673
ENSG00000132854	366.09	-1.47878	0.479988	-3.08086	0.00206403	0.0306682	KANK4	163782
ENSG00000162878	1713.66	-1.48263	0.320242	-4.62972	3.66e-06	0.000480405	PKDCC	91461
ENSG00000102897	986.256	-1.48713	0.292876	-5.07769	3.82e-07	7.96e-05	LYRM1	57149
ENSG00000114742	1128.19	-1.51208	0.291694	-5.18378	2.17e-07	5.09e-05	WDR48	57599
ENSG00000167967	150.4	-1.52763	0.26393	-5.78803	7.12e-09	3.34e-06	E4F1	1877
ENSG00000167968	150.4	-1.52763	0.26393	-5.78803	7.12e-09	3.34e-06	DNASE1L2	1775
ENSG00000260458	219.063	-1.53187	0.51447	-2.97757	0.00290547	0.0368842	KCNJ18	100134444
ENSG00000237412	10024.7	-1.53578	0.499566	-3.07423	0.00211048	0.0309208	PRSS56	646960
ENSG00000249087	160.89	-1.55311	0.474426	-3.27366	0.00106163	0.0200268	ZNF436-AS1	148898
ENSG00000261308	83.3917	-1.57368	0.442725	-3.55454	0.000378643	0.0104999	FIGNL2	401720
ENSG00000185261	1148.07	-1.57522	0.523761	-3.00752	0.00263385	0.0353877	KIAA0825	285600
ENSG00000137809	223.698	-1.57819	0.518818	-3.04189	0.00235095	0.0331471	ITGA11	22801
ENSG00000179348	3158.16	-1.58105	0.374293	-4.2241	2.4e-05	0.00171995	GATA2	2624
ENSG00000261798	46.8679	-1.59454	0.529992	-3.0086	0.00262452	0.0353059	LOC101929536	101929536
ENSG00000168060	49.7861	-1.71485	0.578859	-2.96247	0.00305177	0.0377373	NAALADL1	10004
ENSG00000186594	618.342	-1.71509	0.59288	-2.89281	0.00381808	0.043128	MIR22HG	84981
ENSG00000283824	618.342	-1.71509	0.59288	-2.89281	0.00381808	0.043128	MIR22	407004
ENSG00000150594	59.0777	-1.73472	0.611213	-2.83816	0.0045374	0.0474726	ADRA2A	150
ENSG00000240087	776.17	-1.75651	0.593115	-2.96149	0.00306153	0.0378223	RPSAP12	387867
ENSG00000115084	3295.35	-1.76125	0.588784	-2.99134	0.00277753	0.0361269	SLC35F5	80255
ENSG00000112290	449.032	-1.77034	0.543487	-3.25737	0.0011245	0.0208825	WASF1	8936
ENSG00000213385	32.4996	-1.7955	0.635182	-2.82675	0.00470227	0.0484442	RPL7AP39	646476
ENSG00000222011	32.4996	-1.7955	0.635182	-2.82675	0.00470227	0.0484442	FAM185A	222234
ENSG00000204177	890.541	-1.82037	0.59564	-3.05616	0.00224192	0.032164	BMS1P1	399761
ENSG00000168067	491.858	-1.95443	0.544385	-3.59016	0.000330474	0.00968899	MAP4K2	5871
ENSG00000177666	54.4849	-2.02318	0.48219	-4.19581	2.72e-05	0.00186286	PNPLA2	57104
ENSG00000177685	54.4849	-2.02318	0.48219	-4.19581	2.72e-05	0.00186286	CRACR2B	283229
ENSG00000130635	557.504	-2.02974	0.419103	-4.84307	1.28e-06	0.000217843	COL5A1	1289
ENSG00000101825	44.885	-2.03039	0.597908	-3.39582	0.000684243	0.0152006	MXRA5	25878
ENSG00000131080	28.5965	-2.05089	0.714592	-2.87001	0.00410458	0.044921	EDA2R	60401
ENSG00000022567	1134.65	-2.05144	0.607389	-3.37748	0.000731539	0.0158379	SLC45A4	57210
ENSG00000086504	918.349	-2.09943	0.649987	-3.22996	0.00123806	0.0219826	MRPL28	10573
ENSG00000129925	918.349	-2.09943	0.649987	-3.22996	0.00123806	0.0219826	PGAP6	58986
ENSG00000226496	160.086	-2.21069	0.689365	-3.20685	0.00134196	0.0233286	LINC00323	284835
ENSG00000280109	160.086	-2.21069	0.689365	-3.20685	0.00134196	0.0233286	PLAC4	191585
ENSG00000113240	37.5797	-2.47375	0.445489	-5.55289	2.81e-08	9.33e-06	CLK4	57396
ENSG00000252464	37.5797	-2.47375	0.445489	-5.55289	2.81e-08	9.33e-06	RN7SKP70	107057644
ENSG00000181827	575.958	-2.95675	0.655338	-4.51179	6.43e-06	0.000726465	RFX7	64864
ENSG00000178921	5240.3	-2.99623	0.822867	-3.64121	0.000271364	0.00877839	PFAS	5198
ENSG00000188070	423.617	-3.68359	1.16961	-3.14941	0.00163598	0.0262558	ZFTA	65998
ENSG00000135535	8744.71	-3.75114	0.948506	-3.95478	7.66e-05	0.00385073	CD164	8763
ENSG00000089248	518.4	-3.86856	1.17667	-3.28773	0.00101	0.0193166	ERP29	10961
ENSG00000278845	604.992	-12.621	3.09947	-4.072	4.66e-05	0.00273624	MRPL45	84311
ENSG00000115274	289.445	-25.8405	3.3835	-7.63722	2.22e-14	5.82e-11	INO80B	83444
ENSG00000239779	289.445	-25.8405	3.3835	-7.63722	2.22e-14	5.82e-11	WBP1	23559
ENSG00000274049	289.445	-25.8405	3.3835	-7.63722	2.22e-14	5.82e-11	INO80B-WBP1	100532735
ENSG00000113273	527.923	-26.6034	3.38344	-7.86284	3.76e-15	1.64e-11	ARSB	411

## Sheet: 48 HPI_DEGs
	baseMean	log2FoldChange	lfcSE	stat	pvalue	padj	symbol	ENTREZID
ENSG00000169895	868.819	26.8885	3.38342	7.94715	1.91e-15	3.01e-14	SYAP1	94056
ENSG00000138767	2126.57	14.643	1.09845	13.3306	1.54e-40	9.59e-39	CNOT6L	246175
ENSG00000135899	1666.93	12.2725	0.864097	14.2027	8.82e-46	6.87e-44	SP110	3431
ENSG00000089248	1072.13	11.5814	1.77425	6.52748	6.69e-11	6.86e-10	ERP29	10961
ENSG00000123610	208.556	11.2928	1.03314	10.9305	8.24e-28	2.88e-26	TNFAIP6	7130
ENSG00000124256	202.415	11.2492	1.03327	10.887	1.33e-27	4.57e-26	ZBP1	81030
ENSG00000261040	135.642	10.6725	1.71098	6.23763	4.44e-10	4.14e-09	WFDC21P	645638
ENSG00000101000	340.664	10.5391	1.3132	8.02553	1.01e-15	1.63e-14	PROCR	10544
ENSG00000214872	115.858	10.4455	1.03388	10.1032	5.35e-24	1.48e-22	SMTNL1	219537
ENSG00000225492	88.2085	10.0499	1.04451	9.62159	6.48e-22	1.6e-20	GBP1P1	400759
ENSG00000128422	4759.56	9.69488	3.23231	2.99937	0.00270541	0.00858906	KRT17	3872
ENSG00000197110	55.3161	9.3761	1.05336	8.90117	5.53e-19	1.13e-17	IFNL3	282617
ENSG00000102271	48.6383	9.19244	1.15522	7.95734	1.76e-15	2.77e-14	KLHL4	56062
ENSG00000115009	44.1966	9.05439	1.05082	8.61652	6.9e-18	1.33e-16	CCL20	6364
ENSG00000244122	139.405	8.68247	0.852473	10.185	2.31e-24	6.59e-23	UGT1A7	54577
ENSG00000204021	30.6136	8.52178	1.10319	7.72467	1.12e-14	1.65e-13	LIPK	643414
ENSG00000182333	27.1242	8.35113	1.10451	7.5609	4e-14	5.65e-13	LIPF	8513
ENSG00000169245	1397.67	8.25174	0.764586	10.7924	3.74e-27	1.25e-25	CXCL10	3627
ENSG00000268902	23.2597	8.13007	1.1102	7.32306	2.42e-13	3.2e-12	CSAG2	102723547
ENSG00000157111	23.1518	8.11985	1.15953	7.00269	2.51e-12	3.02e-11	TMEM171	134285
ENSG00000259884	371.32	8.04904	1.52321	5.28426	1.26e-07	8.69e-07	NR4A1AS	115409980
ENSG00000171403	18.0557	7.76566	1.14964	6.75489	1.43e-11	1.59e-10	KRT9	3857
ENSG00000199347	96.8213	7.73411	1.5909	4.86148	1.17e-06	6.96e-06	RNU5E-1	26829
ENSG00000162494	17.5792	7.72309	1.10178	7.00968	2.39e-12	2.88e-11	LRRC38	126755
ENSG00000117228	2506.17	7.68281	0.166751	46.0737	0	0	GBP1	2633
ENSG00000124664	17.0544	7.67656	1.16906	6.56644	5.15e-11	5.37e-10	SPDEF	25803
ENSG00000136244	4363.42	7.57267	0.856208	8.84442	9.2e-19	1.85e-17	IL6	3569
ENSG00000205002	15.7008	7.56177	1.12	6.75156	1.46e-11	1.62e-10	AARD	441376
ENSG00000230040	15.1654	7.51141	1.67705	4.47895	7.5e-06	3.97e-05	LINC00364	100874145
ENSG00000012223	14.6885	7.46648	1.15289	6.47629	9.4e-11	9.48e-10	LTF	4057
ENSG00000253396	14.428	7.44157	1.19416	6.23165	4.62e-10	4.29e-09	LOC105379391	105379391
ENSG00000132274	13754.6	7.42521	0.22601	32.8535	1.01e-236	1.11e-233	TRIM22	10346
ENSG00000181023	13754.6	7.42521	0.22601	32.8535	1.01e-236	1.11e-233	OR56B1	387748
ENSG00000181109	13754.6	7.42521	0.22601	32.8535	1.01e-236	1.11e-233	OR52P1P	81248
ENSG00000140519	13.9954	7.39556	1.20001	6.16294	7.14e-10	6.51e-09	RHCG	51458
ENSG00000128284	700.078	7.34186	0.442707	16.584	9.09e-62	1.17e-59	APOL3	80833
ENSG00000167461	898.92	7.30133	0.795134	9.18251	4.21e-20	9.27e-19	RAB8A	4218
ENSG00000196684	898.92	7.30133	0.795134	9.18251	4.21e-20	9.27e-19	HSH2D	84941
ENSG00000134321	89916.3	7.23931	0.105692	68.4942	0	0	RSAD2	91543
ENSG00000225298	12.2126	7.2029	1.25175	5.75428	8.7e-09	6.97e-08	LINC00113	54088
ENSG00000251669	12.0057	7.1728	1.77862	4.03278	5.51e-05	0.00025166	FAM86EP	348926
ENSG00000168062	872.551	7.07167	0.32984	21.4397	5.7e-102	1.67e-99	BATF2	116071
ENSG00000131203	1599.72	7.03213	0.595604	11.8067	3.6e-32	1.56e-30	IDO1	3620
ENSG00000224048	10.8173	7.02504	1.17199	5.9941	2.05e-09	1.76e-08	LINC02612	101929282
ENSG00000172081	290.864	6.95561	1.86817	3.72321	0.0001967	0.00080712	MOB3A	126308
ENSG00000157368	10.1957	6.9361	1.18455	5.85546	4.76e-09	3.92e-08	IL34	146433
ENSG00000253214	10.0939	6.91874	1.19257	5.80152	6.57e-09	5.33e-08	LOC105375924	105375924
ENSG00000156127	9.8034	6.88183	1.76893	3.89039	0.00010008	0.00043524	BATF	10538
ENSG00000286013	9.5335	6.83862	1.1653	5.86853	4.4e-09	3.64e-08	LOC105375440	105375440
ENSG00000151790	147.888	6.81805	1.50362	4.53442	5.78e-06	3.11e-05	TDO2	6999
ENSG00000124731	9.27064	6.8031	1.25329	5.4282	5.69e-08	4.1e-07	TREM1	54210
ENSG00000229261	9.23764	6.79325	1.14878	5.91344	3.35e-09	2.82e-08	LOC101928994	101928994
ENSG00000130433	170.575	6.79207	1.59098	4.26912	1.96e-05	9.66e-05	CACNG6	59285
ENSG00000154451	553.182	6.76611	0.449386	15.0564	3.14e-51	3e-49	GBP5	115362
ENSG00000134716	8.97261	6.75433	1.27722	5.2883	1.23e-07	8.51e-07	CYP2J2	1573
ENSG00000112559	8.85659	6.73109	1.27938	5.26121	1.43e-07	9.77e-07	MDFI	4188
ENSG00000119812	8.13645	6.61215	2.43461	2.7159	0.00660954	0.0190266	FAM98A	25940
ENSG00000175946	1148.29	6.59265	0.317747	20.7481	1.27e-95	3.2e-93	KLHL38	340359
ENSG00000136514	1252.02	6.54295	0.179419	36.4674	3.64e-291	6.23e-288	RTP4	64108
ENSG00000188282	41.6279	6.50058	0.794734	8.17957	2.85e-16	4.82e-15	RUFY4	285180
ENSG00000106560	71.5783	6.4919	0.596782	10.8782	1.46e-27	5.02e-26	GIMAP2	26157
ENSG00000126266	7.26628	6.4472	1.79408	3.5936	0.00032614	0.00127954	FFAR1	2864
ENSG00000186847	39.8193	6.43343	0.830063	7.75053	9.15e-15	1.36e-13	KRT14	3861
ENSG00000158516	7.18465	6.43156	1.26149	5.09837	3.43e-07	2.21e-06	CPA2	1358
ENSG00000197632	7.11579	6.41992	1.25377	5.12049	3.05e-07	1.99e-06	SERPINB2	5055
ENSG00000271408	7.0967	6.4162	1.29208	4.96581	6.84e-07	4.22e-06	NAPGP1	100288843
ENSG00000144583	7.04847	6.40609	2.41955	2.64763	0.00810571	0.0227889	MARCHF4	57574
ENSG00000260802	7.04575	6.40344	1.24815	5.13034	2.89e-07	1.89e-06	SERTM2	401613
ENSG00000205837	7.01444	6.39349	1.21805	5.24894	1.53e-07	1.04e-06	LINC00487	400941
ENSG00000136689	6.94267	6.38445	1.74357	3.66171	0.00025054	0.00100631	IL1RN	3557
ENSG00000134339	105.971	6.37257	0.530801	12.0056	3.32e-33	1.51e-31	SAA2	6289
ENSG00000112183	6.8871	6.36763	1.24186	5.12748	2.94e-07	1.92e-06	RBM24	221662
ENSG00000183549	6.69693	6.33764	1.35831	4.66582	3.07e-06	1.73e-05	ACSM5	54988
ENSG00000132530	683.328	6.32707	1.34708	4.69689	2.64e-06	1.5e-05	XAF1	54739
ENSG00000122641	561.61	6.31113	0.528707	11.9369	7.6e-33	3.4e-31	INHBA	3624
ENSG00000244474	6.56354	6.30163	1.47092	4.28415	1.83e-05	9.09e-05	UGT1A4	54657
ENSG00000178015	6.43659	6.28011	1.23207	5.09722	3.45e-07	2.23e-06	GPR150	285601
ENSG00000159212	6.44098	6.2762	1.18563	5.29357	1.2e-07	8.28e-07	CLIC6	54102
ENSG00000223656	6.3649	6.26619	1.3627	4.59837	4.26e-06	2.34e-05	HMGB3P10	100129320
ENSG00000224995	6.00541	6.17668	1.81847	3.39664	0.00068219	0.00249645	LINC01526	101928770
ENSG00000178734	5.6566	6.08982	1.7671	3.44623	0.00056847	0.00211647	LMO7DN	729420
ENSG00000162654	555.414	6.08409	0.957968	6.35103	2.14e-10	2.07e-09	GBP4	115361
ENSG00000185467	5.60001	6.0699	1.23414	4.91831	8.73e-07	5.3e-06	KPNA7	402569
ENSG00000239713	23.2549	6.05955	0.975613	6.21102	5.26e-10	4.86e-09	APOBEC3G	60489
ENSG00000254154	65.4757	6.03632	1.42438	4.23786	2.26e-05	0.00010984	SEC16B	89866
ENSG00000171195	5.34587	6.00293	1.30303	4.60689	4.09e-06	2.26e-05	MUC7	4589
ENSG00000204020	120.78	6.00084	0.617655	9.71551	2.59e-22	6.51e-21	LIPN	643418
ENSG00000266976	5.27514	5.98934	1.76816	3.38733	0.00070578	0.00257605	LOC102724908	102724908
ENSG00000183486	8596.54	5.95105	0.142131	41.8702	0	0	MX2	4600
ENSG00000133328	798.3	5.94826	0.562287	10.5787	3.74e-26	1.2e-24	PLAAT2	54979
ENSG00000169248	1495.82	5.92393	0.276545	21.4212	8.47e-102	2.47e-99	CXCL11	6373
ENSG00000164342	929.666	5.89038	0.168136	35.0334	6.97e-269	9.81e-266	TLR3	7098
ENSG00000205784	4.91562	5.88512	1.87672	3.13585	0.00171355	0.00572389	ARRDC5	645432
ENSG00000142224	4.91298	5.88277	1.86015	3.16252	0.00156409	0.00526753	IL19	29949
ENSG00000143171	13.3471	5.88137	1.13616	5.17652	2.26e-07	1.5e-06	RXRG	6258
ENSG00000229563	4.78409	5.84917	1.95916	2.98554	0.00283074	0.00894479	LINC01204	101927528
ENSG00000115155	62.8337	5.81967	1.42533	4.08305	4.44e-05	0.00020607	OTOF	9381
ENSG00000184012	4.61628	5.79325	1.34123	4.31935	1.56e-05	7.84e-05	TMPRSS2	7113
ENSG00000203797	285.18	5.7925	0.25026	23.1459	1.6e-118	5.82e-116	DDO	8528
ENSG00000050730	4.61328	5.79218	1.28045	4.52354	6.08e-06	3.27e-05	TNIP3	79931
ENSG00000162892	266.8	5.78964	0.383055	15.1144	1.3e-51	1.25e-49	IL24	11009
ENSG00000183709	60.9792	5.78865	1.45145	3.98819	6.66e-05	0.00029885	IFNL2	282616
ENSG00000117152	4.47054	5.75381	1.34227	4.28662	1.81e-05	8.99e-05	RGS4	5999
ENSG00000227685	4.39367	5.72671	1.9114	2.99608	0.00273472	0.00867232	LINC02088	105371582
ENSG00000016402	4.36801	5.72388	1.38128	4.14388	3.41e-05	0.00016158	IL20RA	53832
ENSG00000105880	4.39101	5.72385	1.80381	3.1732	0.00150769	0.00509545	DLX5	1749
ENSG00000123609	5808.51	5.72137	0.223496	25.5994	1.55e-144	8.59e-142	NMI	9111
ENSG00000171855	150.066	5.71943	0.387814	14.7479	3.18e-49	2.83e-47	IFNB1	3456
ENSG00000235670	4.35242	5.71851	1.43282	3.99108	6.58e-05	0.00029537	RPL21P40	100271158
ENSG00000134326	2165.15	5.70771	0.803786	7.10103	1.24e-12	1.53e-11	CMPK2	129607
ENSG00000174123	4.32784	5.70013	1.92149	2.96652	0.00301195	0.00945778	TLR10	81793
ENSG00000164692	4.25278	5.68014	1.83259	3.09951	0.0019384	0.00639095	COL1A2	1278
ENSG00000257612	4.24657	5.67726	1.45039	3.91429	9.07e-05	0.00039805	MIR4307HG	101927081
ENSG00000135363	29.0796	5.67616	0.827496	6.85944	6.91e-12	7.97e-11	LMO2	4005
ENSG00000286081	4.24759	5.67592	1.86056	3.05065	0.00228345	0.00740645	LOC105373682	105373682
ENSG00000153820	4.19661	5.66377	1.91776	2.95332	0.00314377	0.00983252	SPHKAP	80309
ENSG00000182393	219.374	5.65941	0.499382	11.3328	9.02e-30	3.48e-28	IFNL1	282618
ENSG00000204022	45.605	5.64468	0.573947	9.83485	7.97e-23	2.06e-21	LIPJ	142910
ENSG00000171234	4.10537	5.62241	1.85075	3.03791	0.00238227	0.00768962	UGT2B7	7364
ENSG00000100342	8823.78	5.61711	0.101783	55.1873	0	0	APOL1	8542
ENSG00000137198	291.869	5.61072	0.237789	23.5954	4.3e-123	1.71e-120	GMPR	2766
ENSG00000236238	3.9931	5.59393	1.40891	3.97041	7.17e-05	0.00032023	RPS14P10	647034
ENSG00000165194	3.95577	5.57394	1.83615	3.03567	0.00240006	0.00772992	PCDH19	57526
ENSG00000225833	3.89256	5.55425	1.91945	2.89367	0.00380771	0.0116745	GS1-594A7.3	104798195
ENSG00000186207	26.2987	5.52817	0.876076	6.31015	2.79e-10	2.66e-09	LCE5A	254910
ENSG00000255120	16.1192	5.51572	1.04152	5.29582	1.18e-07	8.19e-07	OVOL1-AS1	101927828
ENSG00000089169	3.77146	5.50344	1.84026	2.99058	0.00278449	0.00881454	RPH3A	22895
ENSG00000001084	3.7539	5.49766	1.45145	3.7877	0.00015205	0.00063716	GCLC	2729
ENSG00000231683	3.7539	5.49766	1.45145	3.7877	0.00015205	0.00063716	LOC101927136	101927136
ENSG00000205755	322.877	5.49064	2.17134	2.52868	0.0114491	0.0307845	CRLF2	64109
ENSG00000288705	3.72872	5.48833	1.85736	2.95491	0.00312762	0.00978744	UGT1A5	54579
ENSG00000288702	3.64631	5.46024	1.51623	3.60119	0.00031677	0.00124566	UGT1A3	54659
ENSG00000169271	76.3319	5.44683	0.50425	10.8018	3.37e-27	1.13e-25	HSPB3	8988
ENSG00000162891	94.519	5.44044	0.426623	12.7523	3.03e-37	1.67e-35	IL20	50604
ENSG00000111335	35880.6	5.41516	0.0956294	56.6265	0	0	OAS2	4939
ENSG00000168671	9.49484	5.37976	1.16513	4.61729	3.89e-06	2.15e-05	UGT3A2	167127
ENSG00000251685	3.40578	5.35869	1.87124	2.86371	0.00418706	0.0127041	LOC101929773	101929773
ENSG00000259293	3.38488	5.34397	1.98556	2.69142	0.00711495	0.0202888	LIPC-AS1	101928694
ENSG00000223739	3.35888	5.33661	1.44985	3.6808	0.0002325	0.00093991	RPS15AP15	100130782
ENSG00000242049	3.30976	5.32026	1.903	2.79572	0.00517838	0.0153189	DNAJB8-AS1	285224
ENSG00000260192	3.28837	5.30412	1.94307	2.72977	0.00633789	0.018325	LINC02240	101927460
ENSG00000074771	3.24195	5.28161	1.91211	2.76219	0.00574153	0.0167918	NOX3	50508
ENSG00000249978	3.08661	5.21476	1.91523	2.72279	0.00647332	0.0186727	TRGV7	6981
ENSG00000173391	16873.5	5.19459	0.237189	21.9006	2.56e-106	7.7e-104	OLR1	4973
ENSG00000121933	3.02316	5.17906	1.40493	3.68636	0.00022749	0.00092135	TMIGD3	57413
ENSG00000200360	3.02316	5.17906	1.40493	3.68636	0.00022749	0.00092135	RNU6-792P	106481431
ENSG00000282608	3.02316	5.17906	1.40493	3.68636	0.00022749	0.00092135	ADORA3	140
ENSG00000119917	170122	5.17111	0.0913872	56.5846	0	0	IFIT3	3437
ENSG00000175800	2.95325	5.15112	1.99301	2.5846	0.0097493	0.0267921	OR52B3P	387747
ENSG00000166961	2.901	5.12692	1.90938	2.68512	0.00725036	0.0206182	MS4A15	219995
ENSG00000164694	20.9045	5.11304	0.94449	5.41355	6.18e-08	4.44e-07	FNDC1	84624
ENSG00000223458	2.87674	5.10785	1.39233	3.66856	0.00024392	0.00098163	LMO7DN-IT1	104326189
ENSG00000256192	2.84808	5.09675	1.43942	3.54083	0.00039886	0.00153523	OOEPP2	117751741
ENSG00000242147	2.84459	5.0958	1.95037	2.61274	0.0089819	0.0249354	LINC02677	102723629
ENSG00000172175	1321.89	5.0898	1.32224	3.84938	0.00011842	0.00050715	MALT1	10892
ENSG00000227802	2.82262	5.08937	2.02795	2.50962	0.0120861	0.0322518	DNAJB3	414061
ENSG00000241942	2.82599	5.08721	1.92055	2.64883	0.00807711	0.0227182	RPS20P20	100271233
ENSG00000249272	2.80184	5.0755	1.91138	2.65542	0.00792103	0.0223239	UNC93B8	100887748
ENSG00000227158	2.77421	5.06367	1.51514	3.34204	0.00083166	0.00298325	LOC644909	644909
ENSG00000179178	2.76717	5.06194	1.42193	3.5599	0.000371	0.00143683	TMEM125	128218
ENSG00000196581	2.76266	5.05679	1.93809	2.60916	0.00907635	0.0251374	AJAP1	55966
ENSG00000224958	2.77053	5.05298	1.52387	3.31589	0.00091353	0.0032453	PGM5-AS1	572558
ENSG00000119922	170801	5.04396	0.0868245	58.0937	0	0	IFIT2	3433
ENSG00000136834	2.72948	5.0405	1.92675	2.61607	0.00889482	0.0247338	OR1J1	347168
ENSG00000174837	191.408	5.03996	0.469019	10.7457	6.21e-27	2.06e-25	ADGRE1	2015
ENSG00000243596	2.7258	5.03364	1.94451	2.58864	0.00963568	0.0265076	LOC100419967	100419967
ENSG00000182183	2.70684	5.02969	1.93293	2.60211	0.00926533	0.0255978	SHISAL2A	348378
ENSG00000173432	109.616	5.02438	0.315609	15.9196	4.63e-57	5.27e-55	SAA1	6288
ENSG00000201695	109.616	5.02438	0.315609	15.9196	4.63e-57	5.27e-55	RNA5SP334	106865375
ENSG00000268964	2.68962	5.01607	1.98019	2.53312	0.0113052	0.0304579	ERVV-2	100271846
ENSG00000120279	2.67703	5.0095	1.92343	2.60447	0.00920166	0.0254433	MYCT1	80177
ENSG00000229154	2.63532	4.98894	1.93672	2.57598	0.00999561	0.0273906	KCNQ5-AS1	100873997
ENSG00000121895	164.31	4.98361	0.522972	9.52939	1.58e-21	3.82e-20	TMEM156	80008
ENSG00000216471	7.45835	4.97882	1.23878	4.01914	5.84e-05	0.0002653	RPSAP43	643954
ENSG00000133321	3951.9	4.97504	0.434198	11.458	2.14e-30	8.63e-29	PLAAT4	5920
ENSG00000100346	49.365	4.96886	0.639432	7.77074	7.8e-15	1.16e-13	CACNA1I	8911
ENSG00000130487	184.704	4.94632	0.350961	14.0937	4.15e-45	3.19e-43	KLHDC7B	113730
ENSG00000236091	7.39315	4.94388	1.64782	3.00025	0.00269757	0.00856761	LINC02243	340581
ENSG00000158125	41.6572	4.93957	1.04778	4.71433	2.43e-06	1.39e-05	XDH	7498
ENSG00000187608	154904	4.93736	0.0735818	67.1004	0	0	ISG15	9636
ENSG00000162444	2.54102	4.92932	1.97163	2.50012	0.0124151	0.032999	RBP7	116362
ENSG00000152689	1688.71	4.9107	0.132098	37.1745	1.76e-302	3.15e-299	RASGRP3	25780
ENSG00000120341	38.838	4.90065	0.85635	5.72272	1.05e-08	8.31e-08	SEC16B	89866
ENSG00000260939	2.47384	4.89806	2.04387	2.39647	0.0165539	0.0423782	LOC100128523	100128523
ENSG00000043462	19.4883	4.88795	0.944732	5.1739	2.29e-07	1.52e-06	LCP2	3937
ENSG00000248964	2.41953	4.86874	2.00964	2.42269	0.0154062	0.0398257	LOC101929470	101929470
ENSG00000231645	121.606	4.86266	0.324208	14.9986	7.5e-51	7.1e-49	KRT17P6	284196
ENSG00000135114	131577	4.86126	0.0611679	79.4741	0	0	OASL	8638
ENSG00000224034	4.07484	4.86042	1.68138	2.89074	0.00384342	0.0117666	LINC02561	110806285
ENSG00000250827	2.38035	4.8466	2.06458	2.34749	0.0189002	0.0474922	MFSD4BP1	100128154
ENSG00000168016	22191.3	4.83738	1.48489	3.25774	0.00112304	0.0039144	TRANK1	9881
ENSG00000235621	36.7139	4.83689	0.564792	8.56402	1.09e-17	2.08e-16	LINC00494	284749
ENSG00000077522	30.2315	4.83324	0.66844	7.23062	4.81e-13	6.19e-12	ACTN2	88
ENSG00000225383	10.1972	4.82644	1.03238	4.67506	2.94e-06	1.66e-05	SFTA1P	207107
ENSG00000070190	353.854	4.81686	0.187287	25.7191	7.14e-146	4.08e-143	DAPP1	27071
ENSG00000251051	3.96471	4.80942	1.81384	2.65151	0.00801328	0.0225594	ELL2P2	100421143
ENSG00000188778	13.6032	4.77832	1.26342	3.78206	0.00015554	0.00065062	ADRB3	155
ENSG00000177409	26924.6	4.77471	0.117372	40.6802	0	0	SAMD9L	219285
ENSG00000083635	106.249	4.76685	1.76629	2.69879	0.00695919	0.0199155	NUFIP1	26747
ENSG00000181514	2.24932	4.76005	2.02806	2.34709	0.0189204	0.047531	LOC643067	643067
ENSG00000234362	55.2615	4.75921	0.747759	6.36464	1.96e-10	1.9e-09	LINC01914	101929723
ENSG00000241791	2.26377	4.75858	1.70495	2.79104	0.00525388	0.0155247	RN7SL817P	106481144
ENSG00000126262	2.25672	4.75799	2.01817	2.35758	0.0183946	0.0463964	FFAR2	2867
ENSG00000165949	1753.83	4.75623	0.192447	24.7145	7.48e-135	3.51e-132	IFI27	3429
ENSG00000071909	19.5039	4.74694	0.904028	5.25088	1.51e-07	1.03e-06	MYO3B	140469
ENSG00000182179	1652.83	4.74208	0.215484	22.0066	2.49e-107	7.66e-105	UBA7	7318
ENSG00000283726	1652.83	4.74208	0.215484	22.0066	2.49e-107	7.66e-105	MIR5193	100847079
ENSG00000168004	2.18032	4.7115	2.0115	2.34229	0.0191661	0.0480622	PLAAT5	117245
ENSG00000202063	2.17731	4.70775	1.52282	3.09147	0.00199169	0.00654685	RNA5SP79	100873313
ENSG00000116962	26.1999	4.70685	1.02699	4.58317	4.58e-06	2.51e-05	NID1	4811
ENSG00000156920	11.8874	4.68922	1.14101	4.10971	3.96e-05	0.0001849	ADGRG4	139378
ENSG00000138166	31277.8	4.66679	0.0843755	55.3098	0	0	DUSP5	1847
ENSG00000007264	122.557	4.65	0.589743	7.8848	3.15e-15	4.89e-14	MATK	4145
ENSG00000068079	14170.6	4.62057	0.169394	27.2771	7.93e-164	5.68e-161	IFI35	3430
ENSG00000197721	3.46133	4.61751	1.87772	2.4591	0.0139285	0.0364556	CR1L	1379
ENSG00000244703	3.46133	4.61751	1.87772	2.4591	0.0139285	0.0364556	CD46P1	4182
ENSG00000268916	52.9765	4.60748	0.782125	5.89098	3.84e-09	3.21e-08	CSAG3	389903
ENSG00000231766	5.5572	4.59899	1.39165	3.30471	0.00095074	0.00336416	MTCO2P5	107075181
ENSG00000106302	30.4365	4.58303	1.07796	4.25158	2.12e-05	0.00010378	HYAL4	23553
ENSG00000178055	17.8294	4.57194	1.07196	4.26503	2e-05	9.82e-05	PRSS42P	339906
ENSG00000179674	13.6871	4.56661	0.873965	5.22516	1.74e-07	1.18e-06	ARL14	80117
ENSG00000137628	56397.6	4.56634	0.330643	13.8105	2.2e-43	1.55e-41	DDX60	55601
ENSG00000174808	405.667	4.56552	0.191797	23.8039	3.05e-125	1.24e-122	BTC	685
ENSG00000146374	620.919	4.5449	0.173817	26.1477	1.05e-150	6.76e-148	RSPO3	84870
ENSG00000173702	133.286	4.5422	0.271945	16.7026	1.25e-62	1.67e-60	MUC13	56667
ENSG00000167165	10.6299	4.53555	1.59047	2.8517	0.00434858	0.0131334	UGT1A6	54578
ENSG00000239861	1.90826	4.53203	1.69948	2.66672	0.00765964	0.0216663	RPL21P96	100271428
ENSG00000153253	884.176	4.52621	0.1626	27.8365	1.57e-170	1.19e-167	SCN3A	6328
ENSG00000104321	72.7472	4.52311	0.563141	8.03193	9.6e-16	1.55e-14	TRPA1	8989
ENSG00000131737	47.9476	4.50145	0.44244	10.1741	2.59e-24	7.35e-23	KRT34	3885
ENSG00000143771	775.134	4.49229	1.06744	4.20846	2.57e-05	0.00012417	CNIH4	29097
ENSG00000232759	90.0357	4.48692	1.30159	3.44726	0.00056631	0.00210884	LOC100506178	100506178
ENSG00000258689	5.45811	4.48317	1.721	2.60499	0.00918782	0.0254122	LINC01269	103695436
ENSG00000110492	810.798	4.48031	0.241604	18.5441	9.11e-77	1.59e-74	MDK	4192
ENSG00000196611	15.4587	4.46082	1.04185	4.28164	1.86e-05	9.17e-05	MMP1	4312
ENSG00000188293	28.5084	4.45855	0.555681	8.02357	1.03e-15	1.65e-14	IGFL1	374918
ENSG00000254139	4.93532	4.44207	1.73766	2.55635	0.0105778	0.0287664	LOC286178	286178
ENSG00000072858	320.5	4.44125	0.205758	21.5848	2.5e-103	7.45e-101	SIDT1	54847
ENSG00000132463	1365.72	4.43901	0.580741	7.64369	2.11e-14	3.06e-13	GRSF1	2926
ENSG00000271503	17376.3	4.43772	0.143059	31.0203	2.87e-211	2.83e-208	CCL5	6352
ENSG00000203650	101.557	4.42067	0.461614	9.57655	1e-21	2.45e-20	LINC01285	101928287
ENSG00000184719	43.533	4.42047	0.49194	8.9858	2.57e-19	5.4e-18	RNLS	55328
ENSG00000181381	14229.3	4.41775	0.470942	9.38068	6.55e-21	1.52e-19	DDX60L	91351
ENSG00000142677	298.893	4.40011	0.187042	23.5247	2.28e-122	8.97e-120	IL22RA1	58985
ENSG00000231574	29.494	4.39314	0.609373	7.20927	5.63e-13	7.19e-12	LINC02015	102724550
ENSG00000089006	4.80695	4.38692	1.45376	3.01764	0.00254755	0.00814367	SNX5	27131
ENSG00000125850	4.80695	4.38692	1.45376	3.01764	0.00254755	0.00814367	OVOL2	58495
ENSG00000212232	4.80695	4.38692	1.45376	3.01764	0.00254755	0.00814367	SNORD17	692086
ENSG00000170345	26393.6	4.36644	0.265386	16.4532	7.96e-61	9.73e-59	FOS	2353
ENSG00000163827	20.4264	4.35606	1.06683	4.08319	4.44e-05	0.00020597	LRRC2	79442
ENSG00000010030	105.246	4.35278	0.658441	6.61073	3.82e-11	4.04e-10	ETV7	51513
ENSG00000153233	378.143	4.33255	0.220982	19.6058	1.38e-85	2.97e-83	PTPRR	5801
ENSG00000237862	19.6413	4.30096	0.913455	4.70845	2.5e-06	1.42e-05	LOC100506271	100506271
ENSG00000150556	13.7239	4.29958	0.847686	5.07214	3.93e-07	2.51e-06	LYPD6B	130576
ENSG00000175874	1588.99	4.28591	0.272106	15.7509	6.77e-56	7.39e-54	CREG2	200407
ENSG00000236049	15.4826	4.27974	0.951264	4.499	6.83e-06	3.64e-05	LINC01920	101929260
ENSG00000025708	67.4738	4.27129	0.530938	8.0448	8.64e-16	1.4e-14	TYMP	1890
ENSG00000177989	67.4738	4.27129	0.530938	8.0448	8.64e-16	1.4e-14	ODF3B	440836
ENSG00000284194	67.4738	4.27129	0.530938	8.0448	8.64e-16	1.4e-14	SCO2	9997
ENSG00000089127	7879.75	4.25106	0.370259	11.4813	1.64e-30	6.64e-29	OAS1	4938
ENSG00000121858	1014.16	4.241	0.171522	24.7257	5.66e-135	2.68e-132	TNFSF10	8743
ENSG00000146666	41.3992	4.24033	0.705015	6.01453	1.8e-09	1.56e-08	LINC00525	84847
ENSG00000132109	8982.85	4.23354	0.084856	49.8909	0	0	TRIM21	6737
ENSG00000176532	1398.14	4.22093	0.132939	31.7508	3.09e-221	3.21e-218	PRR15	222171
ENSG00000121769	1019.68	4.21184	0.279375	15.0759	2.33e-51	2.24e-49	FABP3	2170
ENSG00000238042	4.48511	4.21016	1.27349	3.306	0.00094637	0.00334959	LINC02257	105372950
ENSG00000019186	842.718	4.19998	0.368773	11.3891	4.74e-30	1.86e-28	CYP24A1	1591
ENSG00000116701	4500.36	4.18553	0.122865	34.0661	2.35e-254	2.89e-251	NCF2	4688
ENSG00000174226	2.59995	4.1794	1.72662	2.42057	0.0154964	0.0399956	SNX31	169166
ENSG00000149131	509.702	4.17581	0.217362	19.2113	2.97e-82	5.95e-80	SERPING1	710
ENSG00000176928	141.113	4.17525	0.29684	14.0657	6.17e-45	4.7e-43	GCNT4	51301
ENSG00000188959	109.803	4.17387	0.304488	13.7078	9.12e-43	6.24e-41	C9orf152	401546
ENSG00000226358	21.1583	4.15928	1.08019	3.85051	0.00011787	0.00050524	KRT8P38	100418799
ENSG00000148677	370.852	4.15126	0.173964	23.8627	7.47e-126	3.1e-123	ANKRD1	27063
ENSG00000120738	24244.8	4.11362	0.192227	21.3999	1.34e-101	3.88e-99	EGR1	1958
ENSG00000123977	6.34376	4.11342	1.08657	3.78569	0.00015329	0.00064201	DAW1	164781
ENSG00000049089	257.512	4.08241	1.26154	3.23604	0.00121198	0.00419249	COL9A2	1298
ENSG00000268629	3.91844	4.07155	1.35944	2.99501	0.00274435	0.00870075	TEX13A	56157
ENSG00000251515	3.98897	4.06839	1.34388	3.02736	0.00246704	0.00792233	CFAP53P1	100129040
ENSG00000206875	3.92195	4.03945	1.32272	3.0539	0.00225888	0.00734067	RNU6-761P	106480607
ENSG00000222317	1.37018	4.03745	1.69053	2.38828	0.0169275	0.0432136	RNA5SP118	100873388
ENSG00000109511	183.321	4.03581	0.244853	16.4826	4.89e-61	6.16e-59	ANXA10	11199
ENSG00000185518	1282.95	4.03414	0.252081	16.0034	1.21e-57	1.39e-55	SV2B	9899
ENSG00000183668	28.4333	4.02787	0.710034	5.67278	1.4e-08	1.1e-07	PSG9	5678
ENSG00000241104	28.4333	4.02787	0.710034	5.67278	1.4e-08	1.1e-07	LOC284344	284344
ENSG00000092054	7.81546	4.02485	1.07503	3.74394	0.00018116	0.0007488	MYH7	4625
ENSG00000205413	105986	4.00157	0.0946281	42.2874	0	0	SAMD9	54809
ENSG00000117226	2916.93	3.99967	0.156276	25.5936	1.8e-144	9.71e-142	GBP3	2635
ENSG00000134575	978.118	3.96798	1.27547	3.111	0.00186454	0.00618013	ACP2	53
ENSG00000163825	6.80856	3.96635	1.67825	2.36339	0.0181086	0.0457748	RTP3	83597
ENSG00000214049	763.801	3.95526	0.141779	27.8973	2.88e-171	2.22e-168	UCA1	652995
ENSG00000159261	19.8503	3.9507	1.1454	3.44917	0.0005623	0.0020955	CLDN14	23562
ENSG00000198788	5.11718	3.94733	1.6717	2.36127	0.0182124	0.0460076	MUC2	4583
ENSG00000152778	143604	3.93009	0.161254	24.372	3.39e-131	1.55e-128	IFIT5	24138
ENSG00000185745	143604	3.93009	0.161254	24.372	3.39e-131	1.55e-128	IFIT1	3434
ENSG00000218857	14.7182	3.92478	0.712477	5.50864	3.62e-08	2.67e-07	LOC100421246	100421246
ENSG00000135604	773.556	3.92028	0.246429	15.9084	5.55e-57	6.29e-55	STX11	8676
ENSG00000198185	5.1173	3.90647	1.27392	3.06649	0.00216589	0.00706528	ZNF334	55713
ENSG00000123358	51182.7	3.90033	0.151103	25.8123	6.45e-147	3.79e-144	NR4A1	3164
ENSG00000251002	30.9485	3.89783	0.654624	5.9543	2.61e-09	2.23e-08	LOC105370401	105370401
ENSG00000067064	5251.62	3.86195	1.32104	2.92342	0.00346214	0.0107298	IDI1	3422
ENSG00000140511	156.048	3.85877	0.230464	16.7434	6.32e-63	8.53e-61	HAPLN3	145864
ENSG00000215182	18.8604	3.84888	0.692961	5.55425	2.79e-08	2.09e-07	MUC5AC	4586
ENSG00000129744	94.3838	3.83953	0.3683	10.425	1.91e-25	5.78e-24	ART1	417
ENSG00000164488	14.6027	3.83883	1.12287	3.41877	0.00062906	0.00232162	DACT2	168002
ENSG00000231131	65.6197	3.83554	0.40099	9.56519	1.12e-21	2.73e-20	LNCAROD	101928687
ENSG00000224259	62.9672	3.83043	0.581524	6.58688	4.49e-11	4.7e-10	LINC01133	100505633
ENSG00000121797	14.2288	3.76818	1.14355	3.29517	0.00098363	0.00346932	CCRL2	9034
ENSG00000263639	23.3336	3.76105	0.919888	4.0886	4.34e-05	0.00020158	MSMB	4477
ENSG00000112499	17.6267	3.73937	1.00522	3.71996	0.00019925	0.00081639	SLC22A2	6582
ENSG00000181963	11.2388	3.73868	0.820953	4.55408	5.26e-06	2.85e-05	OR52K2	119774
ENSG00000229781	261.606	3.73791	0.235402	15.8789	8.88e-57	1e-54	RRN3P4	100129955
ENSG00000001626	52.8047	3.73087	0.44679	8.35039	6.8e-17	1.21e-15	CFTR	1080
ENSG00000128335	2381.41	3.72186	0.827346	4.49855	6.84e-06	3.65e-05	APOL2	23780
ENSG00000253789	6.55967	3.71438	0.990763	3.74901	0.00017754	0.00073506	NARS1P2	100287895
ENSG00000170581	861.602	3.71041	0.819269	4.52893	5.93e-06	3.19e-05	STAT2	6773
ENSG00000141255	407.671	3.70988	0.198467	18.6927	5.68e-78	1.02e-75	SPATA22	84690
ENSG00000167723	407.671	3.70988	0.198467	18.6927	5.68e-78	1.02e-75	TRPV3	162514
ENSG00000162894	604.585	3.68609	0.388914	9.4779	2.59e-21	6.19e-20	FCMR	9214
ENSG00000257725	13.8215	3.67461	0.682582	5.3834	7.31e-08	5.19e-07	LINC02399	105369891
ENSG00000234073	63.4926	3.66411	0.342876	10.6864	1.18e-26	3.86e-25	LOC107986032	107986032
ENSG00000080031	615.103	3.64669	0.16366	22.2822	5.5e-110	1.77e-107	PTPRH	5794
ENSG00000279727	57.7781	3.63841	0.596649	6.09807	1.07e-09	9.56e-09	LINC02033	105377031
ENSG00000168685	1385.43	3.63788	0.409407	8.88574	6.35e-19	1.3e-17	IL7R	3575
ENSG00000163554	18.5571	3.6375	0.790843	4.59952	4.23e-06	2.33e-05	SPTA1	6708
ENSG00000007171	34.3471	3.62355	0.869054	4.16954	3.05e-05	0.00014565	NOS2	4843
ENSG00000172183	12362.1	3.6151	0.0887324	40.7417	0	0	ISG20	3669
ENSG00000225286	10.3887	3.61113	1.00512	3.59275	0.0003272	0.00128311	RPS2P30	100270911
ENSG00000177294	43.913	3.60935	0.466337	7.73978	9.96e-15	1.47e-13	FBXO39	162517
ENSG00000164651	1157.29	3.59816	0.139198	25.8493	2.48e-147	1.48e-144	SP8	221833
ENSG00000120949	31.041	3.58277	0.91516	3.91491	9.04e-05	0.00039712	TNFRSF8	943
ENSG00000072952	19.4667	3.57801	0.897737	3.98559	6.73e-05	0.00030203	IRAG1	10335
ENSG00000153993	4604.39	3.56262	0.152842	23.3092	3.58e-120	1.34e-117	SEMA3D	223117
ENSG00000137745	247.073	3.55558	0.312521	11.3771	5.44e-30	2.13e-28	MMP13	4322
ENSG00000125538	693.026	3.55462	0.148927	23.8683	6.54e-126	2.74e-123	IL1B	3553
ENSG00000075213	1311.86	3.55212	0.0877546	40.4779	0	0	SEMA3A	10371
ENSG00000116833	53.3037	3.54438	0.717233	4.94174	7.74e-07	4.75e-06	NR5A2	2494
ENSG00000246022	7.51417	3.54206	1.28207	2.76276	0.00573155	0.0167689	ALDH1L1-AS2	100862662
ENSG00000117450	1611.62	3.54026	1.02676	3.44801	0.00056473	0.00210376	PRDX1	5052
ENSG00000228742	22.2681	3.53287	0.678627	5.20591	1.93e-07	1.3e-06	LINC02577	111216280
ENSG00000175482	475.05	3.52482	0.489887	7.19518	6.24e-13	7.92e-12	POLD4	57804
ENSG00000175505	475.05	3.52482	0.489887	7.19518	6.24e-13	7.92e-12	CLCF1	23529
ENSG00000174279	7.79177	3.52297	1.13701	3.09845	0.00194539	0.00640972	EVX2	344191
ENSG00000186832	189.731	3.52273	0.289059	12.1869	3.65e-34	1.73e-32	KRT16	3868
ENSG00000243137	335.138	3.51792	0.21075	16.6924	1.49e-62	1.98e-60	PSG4	5672
ENSG00000221963	18342.6	3.51063	0.0678282	51.7577	0	0	APOL6	80830
ENSG00000259256	13.777	3.49377	0.841018	4.15422	3.26e-05	0.00015482	LINC01895	105371964
ENSG00000174502	8.80653	3.48992	1.18807	2.93748	0.0033089	0.0102959	SLC26A9	115019
ENSG00000234488	2.81353	3.48723	1.35224	2.57884	0.00991322	0.0271988	RPL27P6	647112
ENSG00000233610	20.7954	3.47592	0.945638	3.67574	0.00023717	0.00095709	LINC00462	100129597
ENSG00000184979	2170.8	3.47064	0.280009	12.3947	2.79e-35	1.39e-33	USP18	11274
ENSG00000140107	36.9471	3.46588	0.895924	3.8685	0.00010951	0.00047279	SLC25A47	283600
ENSG00000228971	36.2603	3.46037	0.653753	5.29308	1.2e-07	8.3e-07	LINC02607	100996635
ENSG00000169429	3580.48	3.45612	0.135356	25.5336	8.36e-144	4.42e-141	CXCL8	3576
ENSG00000196417	8.10017	3.45578	0.853162	4.05056	5.11e-05	0.00023421	ZNF765	91661
ENSG00000203326	8.10017	3.45578	0.853162	4.05056	5.11e-05	0.00023421	ZNF525	170958
ENSG00000213799	8.10017	3.45578	0.853162	4.05056	5.11e-05	0.00023421	ZNF845	91664
ENSG00000100298	12.1099	3.44074	0.713109	4.82499	1.4e-06	8.27e-06	APOBEC3H	164668
ENSG00000177606	1987.85	3.41706	0.805806	4.24054	2.23e-05	0.00010863	JUN	3725
ENSG00000162772	730.354	3.41129	0.150766	22.6264	2.38e-113	8.3e-111	ATF3	467
ENSG00000285823	16.5231	3.40973	1.24398	2.74099	0.00612544	0.0177812	LINC02793	105376879
ENSG00000218020	6.0109	3.40911	1.27887	2.66571	0.00768263	0.0217217	THAP12P5	100129074
ENSG00000127445	63.795	3.4049	1.36979	2.48571	0.0129295	0.0342182	PIN1	5300
ENSG00000157077	562.174	3.39772	1.1779	2.88456	0.00391963	0.0119869	ZFYVE9	9372
ENSG00000228203	45.0548	3.39331	0.439669	7.71789	1.18e-14	1.74e-13	GRASLND	386597
ENSG00000133401	33946.9	3.38699	0.131522	25.7522	3.04e-146	1.76e-143	PDZD2	23037
ENSG00000095637	797.919	3.38448	0.108985	31.0547	9.87e-212	9.96e-209	SORBS1	10580
ENSG00000067798	487.562	3.37752	0.176947	19.0877	3.19e-81	6.26e-79	NAV3	89795
ENSG00000156804	3521.37	3.37432	0.131491	25.662	3.11e-145	1.75e-142	FBXO32	114907
ENSG00000079385	1528.19	3.36575	0.0928237	36.2596	7.02e-288	1.15e-284	CEACAM1	634
ENSG00000176907	58213.1	3.36214	0.282901	11.8845	1.42e-32	6.28e-31	TCIM	56892
ENSG00000261652	1443.37	3.34975	0.155359	21.5614	4.14e-103	1.23e-100	C15orf65	145788
ENSG00000153294	17.5541	3.33299	0.956534	3.48445	0.00049315	0.00186264	ADGRF4	221393
ENSG00000166510	3393.97	3.31361	0.249347	13.2891	2.68e-40	1.66e-38	CCDC68	80323
ENSG00000226297	5.79025	3.29637	1.09731	3.00403	0.00266427	0.00847277	RPL17P14	100270941
ENSG00000115963	7356.23	3.29337	0.184247	17.8748	1.85e-71	2.88e-69	RND3	390
ENSG00000204642	97.8465	3.28615	0.277921	11.8241	2.93e-32	1.28e-30	HLA-F	3134
ENSG00000184497	105.652	3.28454	0.659493	4.9804	6.35e-07	3.93e-06	TMEM255B	348013
ENSG00000156510	140.182	3.28074	0.258914	12.6711	8.55e-37	4.62e-35	HKDC1	80201
ENSG00000130589	56165.2	3.27795	0.121484	26.9825	2.37e-160	1.61e-157	HELZ2	85441
ENSG00000221845	35.2417	3.25701	0.636361	5.11818	3.09e-07	2.01e-06	LINC02902	401335
ENSG00000105889	79.7847	3.24622	0.310865	10.4425	1.59e-25	4.86e-24	STEAP1B	256227
ENSG00000179428	79.7847	3.24622	0.310865	10.4425	1.59e-25	4.86e-24	IL6-AS1	541472
ENSG00000092295	349.368	3.24279	1.20509	2.69091	0.00712584	0.0203167	TGM1	7051
ENSG00000152611	23.5388	3.24245	0.697028	4.65182	3.29e-06	1.84e-05	CAPSL	133690
ENSG00000129451	7.49175	3.24222	1.34134	2.41716	0.0156421	0.0403294	KLK10	5655
ENSG00000204592	5700.89	3.24026	0.100165	32.3493	1.42e-229	1.51e-226	HLA-E	3133
ENSG00000078018	1182.74	3.23836	0.340597	9.50789	1.95e-21	4.67e-20	MAP2	4133
ENSG00000253349	2.39338	3.23051	1.3506	2.3919	0.0167616	0.0428483	COX6B1P6	100462851
ENSG00000124429	45.1698	3.22794	0.629709	5.12608	2.96e-07	1.93e-06	POF1B	79983
ENSG00000107201	58448.1	3.22307	0.178771	18.0291	1.15e-72	1.82e-70	DDX58	23586
ENSG00000165264	58448.1	3.22307	0.178771	18.0291	1.15e-72	1.82e-70	NDUFB6	4712
ENSG00000197579	58448.1	3.22307	0.178771	18.0291	1.15e-72	1.82e-70	TOPORS	10210
ENSG00000184898	1226.27	3.21866	0.129889	24.7801	1.47e-135	7.05e-133	RBM43	375287
ENSG00000160446	372.887	3.2128	0.543109	5.91557	3.31e-09	2.79e-08	ZDHHC12	84885
ENSG00000096996	61.165	3.20205	0.340634	9.40026	5.44e-21	1.27e-19	IL12RB1	3594
ENSG00000178150	70.4409	3.19843	0.283495	11.2821	1.61e-29	6.14e-28	ZNF114	163071
ENSG00000236013	16.0013	3.19223	0.865677	3.68755	0.00022642	0.00091749	LOC100507477	100507477
ENSG00000213557	8.64685	3.19172	1.23821	2.57769	0.00994627	0.0272743	RPL31P43	392382
ENSG00000178033	519.258	3.18846	0.387311	8.23231	1.84e-16	3.16e-15	CALHM5	254228
ENSG00000257368	3.18322	3.18524	1.36225	2.33822	0.0193758	0.0485294	LOC100128248	100128248
ENSG00000204941	46.5614	3.17892	0.45131	7.04376	1.87e-12	2.27e-11	PSG5	5673
ENSG00000115008	580.084	3.17351	0.156168	20.321	8.38e-92	2e-89	IL1A	3552
ENSG00000250685	7.67262	3.17044	1.2981	2.44238	0.014591	0.0379924	LOC654780	654780
ENSG00000234256	5.2202	3.16903	1.16378	2.72305	0.0064682	0.0186607	PTCD2P2	100132487
ENSG00000248771	14.0994	3.1682	0.94043	3.36889	0.00075473	0.00273671	SMIM31	100505989
ENSG00000154642	3764.53	3.16512	0.447698	7.06976	1.55e-12	1.9e-11	C21orf91	54149
ENSG00000240770	3764.53	3.16512	0.447698	7.06976	1.55e-12	1.9e-11	C21orf91-OT1	246312
ENSG00000241111	51.4962	3.15408	0.650616	4.84784	1.25e-06	7.44e-06	PRICKLE2-AS1	100652759
ENSG00000142694	307.493	3.13845	0.28295	11.0919	1.37e-28	4.99e-27	EVA1B	55194
ENSG00000130940	356.632	3.13635	0.176005	17.8196	4.98e-71	7.66e-69	CASZ1	54897
ENSG00000116786	2905.88	3.13539	1.32103	2.37345	0.0176228	0.0447507	PLEKHM2	23207
ENSG00000164181	9.3113	3.12466	1.23527	2.52954	0.0114213	0.0307244	ELOVL7	79993
ENSG00000233671	21.7208	3.12175	0.565022	5.52501	3.29e-08	2.45e-07	CENPNP1	100132498
ENSG00000227145	81.9406	3.11672	0.447345	6.96715	3.23e-12	3.85e-11	IL21-AS1	100996941
ENSG00000106588	2144.48	3.11572	1.21537	2.56361	0.0103591	0.0282549	PSMA2	5683
ENSG00000136197	2144.48	3.11572	1.21537	2.56361	0.0103591	0.0282549	C7orf25	79020
ENSG00000026950	4153.35	3.11325	0.18896	16.4757	5.49e-61	6.73e-59	BTN3A1	11119
ENSG00000111801	4153.35	3.11325	0.18896	16.4757	5.49e-61	6.73e-59	BTN3A3	10384
ENSG00000112763	4153.35	3.11325	0.18896	16.4757	5.49e-61	6.73e-59	BTN2A1	11120
ENSG00000124549	4153.35	3.11325	0.18896	16.4757	5.49e-61	6.73e-59	BTN2A3P	54718
ENSG00000186470	4153.35	3.11325	0.18896	16.4757	5.49e-61	6.73e-59	BTN3A2	11118
ENSG00000168427	162.814	3.11005	0.318979	9.75	1.84e-22	4.68e-21	KLHL30	377007
ENSG00000221866	84.1791	3.10745	0.341189	9.10771	8.41e-20	1.82e-18	PLXNA4	91584
ENSG00000167995	7911.1	3.10462	0.305394	10.1659	2.81e-24	7.97e-23	BEST1	7439
ENSG00000070808	33.4246	3.09125	1.00243	3.08376	0.00204404	0.00670557	CAMK2A	815
ENSG00000249464	123.382	3.08562	0.33223	9.28761	1.58e-20	3.57e-19	LINC01091	285419
ENSG00000168280	7.06839	3.08031	0.913446	3.37218	0.00074575	0.00270666	KIF5C	3800
ENSG00000251173	18.1656	3.07747	0.96724	3.18171	0.00146409	0.00496559	UCHL1-DT	101410542
ENSG00000268223	27.9813	3.07741	0.931977	3.30202	0.00095991	0.00339445	ARL14EPL	644100
ENSG00000130813	11001.6	3.07687	0.145372	21.1655	1.99e-99	5.4e-97	SHFL	55337
ENSG00000235531	203.104	3.07368	0.257125	11.9541	6.18e-33	2.78e-31	MSC-AS1	100132891
ENSG00000134668	48.4597	3.06936	0.35578	8.62712	6.29e-18	1.21e-16	SPOCD1	90853
ENSG00000125740	11718.9	3.06203	0.169777	18.0356	1.02e-72	1.65e-70	FOSB	2354
ENSG00000198133	414.022	3.05261	0.234644	13.0095	1.08e-38	6.41e-37	TMEM229B	161145
ENSG00000105278	13.9743	3.04787	0.670429	4.54615	5.46e-06	2.96e-05	ZFR2	23217
ENSG00000104856	2206.73	3.04729	0.107945	28.23	2.5e-175	2.01e-172	RELB	5971
ENSG00000095739	2037.98	3.04503	0.121619	25.0376	2.38e-138	1.17e-135	BAMBI	25805
ENSG00000122643	24029.9	3.04072	0.0907069	33.5224	2.27e-246	2.71e-243	NT5C3A	51251
ENSG00000169220	342.223	3.03578	0.229455	13.2304	5.86e-40	3.59e-38	RGS14	10636
ENSG00000135074	16.065	3.03488	0.917479	3.30785	0.00094017	0.00332973	ADAM19	8728
ENSG00000141497	143.516	3.02345	0.249417	12.1221	8.07e-34	3.74e-32	ZMYND15	84225
ENSG00000138496	13323.5	3.02264	0.198569	15.2221	2.52e-52	2.53e-50	PARP9	83666
ENSG00000173212	892.708	3.00926	0.123684	24.3302	9.38e-131	4.15e-128	MAB21L3	126868
ENSG00000172927	179.408	3.00613	0.24911	12.0675	1.57e-33	7.18e-32	MYEOV	26579
ENSG00000258733	93.5252	3.00501	0.24761	12.1361	6.8e-34	3.17e-32	LINC02328	101928767
ENSG00000139112	13002.3	2.99134	0.262258	11.4061	3.9e-30	1.55e-28	GABARAPL1	23710
ENSG00000118503	26306.1	2.98648	0.157892	18.9147	8.62e-80	1.62e-77	TNFAIP3	7128
ENSG00000233534	3.94837	2.97799	1.24599	2.39006	0.0168456	0.0430446	LINC02524	105378013
ENSG00000146411	699.933	2.97738	0.1779	16.7363	7.13e-63	9.59e-61	SLC2A12	154091
ENSG00000138646	21653.1	2.97566	0.21852	13.6174	3.16e-42	2.09e-40	HERC5	51191
ENSG00000196116	7800.75	2.97309	0.0748982	39.695	0	0	TDRD7	23424
ENSG00000095932	49.2937	2.97101	0.405098	7.33405	2.23e-13	2.96e-12	SMIM24	284422
ENSG00000214108	147.317	2.96845	0.255868	11.6015	4.05e-31	1.68e-29	TPT1P5	100421420
ENSG00000183431	47.575	2.9664	0.878198	3.37783	0.00073061	0.00265756	SF3A3	10946
ENSG00000087302	5844.83	2.96021	0.307413	9.62942	6.01e-22	1.48e-20	RTRAF	51637
ENSG00000105568	1524.17	2.95859	1.03094	2.8698	0.00410729	0.0125035	PPP2R1A	5518
ENSG00000274380	1524.17	2.95859	1.03094	2.8698	0.00410729	0.0125035	MIR6801	102466984
ENSG00000196668	39.917	2.95183	0.603437	4.89169	1e-06	6.03e-06	LINC00173	100287569
ENSG00000197506	445.127	2.95076	0.262123	11.2572	2.14e-29	8.07e-28	SLC28A3	64078
ENSG00000170298	110.688	2.94849	0.233582	12.6229	1.58e-36	8.43e-35	LGALS9B	284194
ENSG00000115718	344.326	2.93935	0.21728	13.528	1.07e-41	6.93e-40	PROC	5624
ENSG00000169203	383.692	2.93771	0.553047	5.31185	1.09e-07	7.53e-07	NPIPB12	440353
ENSG00000183336	383.692	2.93771	0.553047	5.31185	1.09e-07	7.53e-07	BOLA2	552900
ENSG00000254634	383.692	2.93771	0.553047	5.31185	1.09e-07	7.53e-07	SMG1P6	100422558
ENSG00000260727	383.692	2.93771	0.553047	5.31185	1.09e-07	7.53e-07	SLC7A5P1	81893
ENSG00000261740	383.692	2.93771	0.553047	5.31185	1.09e-07	7.53e-07	BOLA2-SMG1P6	107282092
ENSG00000172403	413.666	2.93711	0.199806	14.6998	6.46e-49	5.62e-47	SYNPO2	171024
ENSG00000184611	17.4227	2.93513	0.872907	3.36248	0.00077245	0.00279379	KCNH7	90134
ENSG00000074855	714.458	2.93419	0.544551	5.38827	7.11e-08	5.06e-07	ANO8	57719
ENSG00000231763	7.72863	2.92996	0.737697	3.97177	7.13e-05	0.00031895	SLC66A2P1	106479032
ENSG00000255259	7.8767	2.92413	0.988743	2.95742	0.00310227	0.00971739	ZNF123P	100188891
ENSG00000154153	8907.53	2.92358	0.116836	25.023	3.44e-138	1.67e-135	RETREG1	54463
ENSG00000073756	10001.4	2.92334	0.358053	8.16455	3.23e-16	5.44e-15	PTGS2	5743
ENSG00000114541	524.815	2.92327	0.120065	24.3474	6.17e-131	2.76e-128	FRMD4B	23150
ENSG00000197646	270.739	2.91864	0.186088	15.6842	1.94e-55	2.08e-53	PDCD1LG2	80380
ENSG00000178502	1910.72	2.91724	1.02745	2.8393	0.00452125	0.0135955	KLHL11	55175
ENSG00000163083	32.2276	2.91695	0.545296	5.3493	8.83e-08	6.2e-07	INHBB	3625
ENSG00000154319	47.6035	2.90953	0.349371	8.32791	8.23e-17	1.46e-15	FAM167A	83648
ENSG00000214929	5.6035	2.90485	1.21039	2.39993	0.0163984	0.0420373	SPATA31D1	389763
ENSG00000139178	23077.3	2.90332	0.125729	23.0919	5.58e-118	2e-115	C1RL	51279
ENSG00000159403	23077.3	2.90332	0.125729	23.0919	5.58e-118	2e-115	C1R	715
ENSG00000166396	287.569	2.90176	0.287865	10.0803	6.75e-24	1.86e-22	SERPINB7	8710
ENSG00000155511	16.6674	2.89922	0.711902	4.0725	4.65e-05	0.00021457	GRIA1	2890
ENSG00000099260	4896.83	2.88202	0.242076	11.9054	1.11e-32	4.92e-31	PALMD	54873
ENSG00000164171	22820.7	2.88082	0.118259	24.3604	4.5e-131	2.04e-128	ITGA2	3673
ENSG00000238266	683.517	2.87956	0.494875	5.81877	5.93e-09	4.83e-08	LINC00707	100507127
ENSG00000203801	12.2928	2.87519	0.872574	3.29507	0.00098398	0.00347023	LINC00222	387111
ENSG00000078401	7734.8	2.87197	0.0980578	29.2885	1.45e-188	1.33e-185	EDN1	1906
ENSG00000151882	1932.26	2.87108	0.157799	18.1945	5.7e-74	9.44e-72	CCL28	56477
ENSG00000185236	1610.61	2.87021	0.965075	2.97408	0.00293873	0.00925	RAB11B	9230
ENSG00000137507	22.5624	2.86862	0.677048	4.23695	2.27e-05	0.00011026	LRRC32	2615
ENSG00000160870	386.371	2.86802	0.666913	4.30044	1.7e-05	8.47e-05	CYP3A7	1551
ENSG00000282277	386.371	2.86802	0.666913	4.30044	1.7e-05	8.47e-05	CYP3A51P	1578
ENSG00000282301	386.371	2.86802	0.666913	4.30044	1.7e-05	8.47e-05	CYP3A7-CYP3A51P	100861540
ENSG00000023445	12555.9	2.85869	0.429001	6.6636	2.67e-11	2.87e-10	BIRC3	330
ENSG00000212466	12555.9	2.85869	0.429001	6.6636	2.67e-11	2.87e-10	RNU6-952P	106479987
ENSG00000236345	346.658	2.85754	0.207509	13.7707	3.82e-43	2.67e-41	SCAT8	112935969
ENSG00000135116	1088.19	2.84974	0.187423	15.2048	3.28e-52	3.27e-50	HRK	8739
ENSG00000168394	145.33	2.8474	0.329271	8.6476	5.26e-18	1.02e-16	TAP1	6890
ENSG00000252659	7.58308	-2.09767	0.752896	-2.78614	0.00533405	0.0157286	RNU6-1088P	106480044
ENSG00000272273	33.1496	-2.10076	0.420134	-5.00021	5.73e-07	3.58e-06	IER3-AS1	105379695
ENSG00000255157	17.6556	-2.10155	0.785357	-2.67592	0.00745252	0.0211335	DEFB130C	110806270
ENSG00000256746	72.8363	-2.10671	0.302819	-6.95699	3.48e-12	4.12e-11	MADD-AS1	101928943
ENSG00000260394	103.942	-2.1106	0.37721	-5.5953	2.2e-08	1.67e-07	STUB1-DT	105371184
ENSG00000229091	173.244	-2.11139	0.340409	-6.2025	5.56e-10	5.12e-09	HSPA8P8	100287551
ENSG00000054793	19893.6	-2.11817	0.389204	-5.44232	5.26e-08	3.8e-07	ATP9A	10079
ENSG00000115841	1351.29	-2.12045	0.373156	-5.68246	1.33e-08	1.04e-07	RMDN2	151393
ENSG00000261170	181.159	-2.12217	0.175853	-12.0678	1.56e-33	7.16e-32	LOC107984827	107984827
ENSG00000119608	189.052	-2.12423	0.336353	-6.31549	2.69e-10	2.58e-09	PROX2	283571
ENSG00000264386	12.8418	-2.12473	0.537022	-3.9565	7.61e-05	0.00033784	MIR4513	100616183
ENSG00000229214	13.0649	-2.1296	0.888259	-2.3975	0.0165074	0.0422792	LINC00242	401288
ENSG00000091129	575.202	-2.13245	0.158153	-13.4835	1.96e-41	1.26e-39	NRCAM	4897
ENSG00000115461	267.205	-2.13349	0.152216	-14.0162	1.24e-44	9.26e-43	IGFBP5	3488
ENSG00000201659	6.47407	-2.13821	0.832401	-2.56873	0.0102072	0.0279043	RNU12-2P	26823
ENSG00000231690	12.8428	-2.13842	0.714677	-2.99215	0.00277021	0.00877229	LINC00574	80069
ENSG00000183044	151.663	-2.13898	0.212464	-10.0675	7.69e-24	2.11e-22	ABAT	18
ENSG00000112212	10.735	-2.14077	0.671168	-3.18961	0.00142463	0.00484845	TSPO2	222642
ENSG00000173811	50.2637	-2.14128	0.471823	-4.53832	5.67e-06	3.06e-05	CCDC13-AS1	100874114
ENSG00000108244	9.5136	-2.14275	0.576239	-3.71851	0.0002004	0.00082102	KRT23	25984
ENSG00000154518	52.1362	-2.14481	0.777062	-2.76016	0.00577738	0.0168816	ATP5MC3	518
ENSG00000264017	21.7221	-2.14798	0.436253	-4.9237	8.49e-07	5.18e-06	RN7SL336P	106479346
ENSG00000134532	55.579	-2.15133	0.818583	-2.62812	0.00858591	0.0239917	SOX5	6660
ENSG00000221502	5.84185	-2.15746	0.778216	-2.77231	0.005566	0.0163319	MIR1245A	100302219
ENSG00000241684	15.3392	-2.15869	0.688629	-3.13477	0.00171988	0.0057428	ADAMTS9-AS2	100507098
ENSG00000169750	886.314	-2.15999	0.156379	-13.8126	2.14e-43	1.51e-41	RAC3	5881
ENSG00000143512	46.1754	-2.16102	0.375694	-5.75206	8.82e-09	7.06e-08	HHIPL2	79802
ENSG00000260660	53.0128	-2.16224	0.471064	-4.59012	4.43e-06	2.43e-05	LOC105376731	105376731
ENSG00000264607	6.56824	-2.16571	0.750524	-2.8856	0.00390669	0.0119491	MIR3173	100422981
ENSG00000248455	25.7591	-2.16579	0.647149	-3.34667	0.00081788	0.00293946	LINC02217	101929544
ENSG00000119535	57.8434	-2.16868	0.67306	-3.22212	0.00127244	0.00437894	CSF3R	1441
ENSG00000257771	146.642	-2.17053	0.312306	-6.95001	3.65e-12	4.33e-11	LINC02395	101927292
ENSG00000268006	883.404	-2.17083	0.145424	-14.9276	2.18e-50	2.01e-48	PTOV1-AS1	100506033
ENSG00000224354	10.9417	-2.1712	0.66593	-3.2604	0.00111257	0.00388073	MTND2P5	100873176
ENSG00000224977	101.652	-2.1727	0.252131	-8.61732	6.85e-18	1.32e-16	RC3H1-DT	105371620
ENSG00000127578	288.098	-2.17494	0.18767	-11.5892	4.68e-31	1.92e-29	WFIKKN1	117166
ENSG00000197562	288.098	-2.17494	0.18767	-11.5892	4.68e-31	1.92e-29	RAB40C	57799
ENSG00000241874	17.9059	-2.18031	0.670046	-3.25397	0.00113806	0.00396148	TOMM22P6	100287573
ENSG00000255181	6.48798	-2.1937	0.864611	-2.53721	0.0111741	0.030148	CCDC166	100130274
ENSG00000226167	189.467	-2.19688	0.228019	-9.63463	5.71e-22	1.41e-20	AP4B1-AS1	100287722
ENSG00000265092	9.56769	-2.19718	0.662282	-3.31759	0.00090797	0.00322732	MIR4484	100616327
ENSG00000171551	154.592	-2.20454	0.252468	-8.73195	2.5e-18	4.93e-17	ECEL1	9427
ENSG00000182759	716.641	-2.21034	0.204612	-10.8026	3.35e-27	1.13e-25	MAFA	389692
ENSG00000167747	29.0758	-2.21727	0.795653	-2.78673	0.00532426	0.0157056	C19orf48	84798
ENSG00000220988	29.0758	-2.21727	0.795653	-2.78673	0.00532426	0.0157056	SNORD88C	692204
ENSG00000221241	29.0758	-2.21727	0.795653	-2.78673	0.00532426	0.0157056	SNORD88A	692202
ENSG00000221381	29.0758	-2.21727	0.795653	-2.78673	0.00532426	0.0157056	SNORD88B	692203
ENSG00000281491	16.2099	-2.21851	0.604148	-3.67213	0.00024054	0.00096941	DNAJB5-DT	101926900
ENSG00000167800	45.2638	-2.23075	0.404611	-5.51333	3.52e-08	2.6e-07	TBX10	347853
ENSG00000067992	6749.1	-2.24013	0.0824424	-27.172	1.39e-162	9.78e-160	PDK3	5165
ENSG00000152556	10.797	-2.24732	0.647426	-3.47116	0.00051821	0.00194592	PFKM	5213
ENSG00000275770	10.797	-2.24732	0.647426	-3.47116	0.00051821	0.00194592	MIR6505	102466657
ENSG00000231811	13.6909	-2.24834	0.928474	-2.42154	0.015455	0.039918	LOC101927888	101927888
ENSG00000175097	50.3784	-2.25033	0.296694	-7.58469	3.33e-14	4.73e-13	RAG2	5897
ENSG00000259540	16.9269	-2.25193	0.954182	-2.36006	0.0182719	0.0461462	LOC102723335	102723335
ENSG00000177669	20.4416	-2.25452	0.478664	-4.71002	2.48e-06	1.41e-05	MBOAT4	619373
ENSG00000232850	207.834	-2.25546	0.233685	-9.6517	4.83e-22	1.2e-20	PTGES2-AS1	389791
ENSG00000134242	25.8721	-2.25682	0.777801	-2.90154	0.00371333	0.0114252	PTPN22	26191
ENSG00000271236	18.7255	-2.25833	0.58574	-3.85552	0.00011548	0.00049613	SUMO2P15	106480417
ENSG00000275846	40.5554	-2.27548	0.549294	-4.14256	3.43e-05	0.00016246	LOC105374989	105374989
ENSG00000226393	9.77408	-2.27621	0.798971	-2.84892	0.00438677	0.0132397	IFNA20P	3463
ENSG00000122729	449.752	-2.27635	0.284693	-7.99582	1.29e-15	2.05e-14	ACO1	48
ENSG00000242048	23.0853	-2.27638	0.492333	-4.62365	3.77e-06	2.09e-05	LOC644090	644090
ENSG00000236081	4156.44	-2.27989	0.12433	-18.3374	4.16e-75	7.01e-73	ELFN1-AS1	101927125
ENSG00000105610	7.60936	-2.28202	0.939972	-2.42775	0.0151928	0.0393334	KLF1	10661
ENSG00000261404	34.0117	-2.28206	0.476301	-4.79121	1.66e-06	9.68e-06	PSMD7-DT	101928035
ENSG00000137207	18.9863	-2.28552	0.597303	-3.8264	0.00013003	0.00055195	YIPF3	25844
ENSG00000204052	18.9863	-2.28552	0.597303	-3.8264	0.00013003	0.00055195	LRRC73	221424
ENSG00000102053	815.056	-2.28555	0.175914	-12.9924	1.35e-38	7.97e-37	ZC3H12B	340554
ENSG00000176641	1236.92	-2.28569	0.46908	-4.87272	1.1e-06	6.6e-06	RNF152	220441
ENSG00000168060	58.1792	-2.28643	0.397806	-5.7476	9.05e-09	7.24e-08	NAALADL1	10004
ENSG00000127588	87.483	-2.28714	0.292026	-7.83198	4.8e-15	7.35e-14	GNG13	51764
ENSG00000124253	1222.15	-2.2934	0.200283	-11.4508	2.33e-30	9.37e-29	PCK1	5105
ENSG00000188032	87.0244	-2.29525	0.268695	-8.5422	1.32e-17	2.49e-16	C19orf67	646457
ENSG00000206938	11.0885	-2.29711	0.572668	-4.01125	6.04e-05	0.00027369	RNU4-31P	106480546
ENSG00000164051	28.4907	-2.29814	0.803751	-2.85927	0.0042462	0.0128687	CCDC51	79714
ENSG00000153292	48.1113	-2.30089	0.860896	-2.67267	0.0075251	0.0213179	ADGRF1	266977
ENSG00000064835	16.5785	-2.30137	0.762828	-3.0169	0.00255378	0.00816161	POU1F1	5449
ENSG00000206597	913.496	-2.30198	0.147902	-15.5643	1.27e-54	1.34e-52	SNORA57	692158
ENSG00000214756	913.496	-2.30198	0.147902	-15.5643	1.27e-54	1.34e-52	CSKMT	751071
ENSG00000228037	29.8487	-2.30882	0.396729	-5.81965	5.9e-09	4.81e-08	LOC100996583	100996583
ENSG00000158104	5366.12	-2.31217	0.710063	-3.25628	0.00112882	0.0039328	HPD	3242
ENSG00000162599	2013.34	-2.31293	0.716608	-3.2276	0.00124832	0.00430685	NFIA	4774
ENSG00000183307	19.6972	-2.31408	0.699299	-3.30915	0.00093579	0.00331542	TMEM121B	27439
ENSG00000230679	84.9653	-2.3167	0.341059	-6.79266	1.1e-11	1.24e-10	ENO1-AS1	100505975
ENSG00000187736	368.548	-2.32117	0.288222	-8.05341	8.05e-16	1.31e-14	NHEJ1	79840
ENSG00000213901	368.548	-2.32117	0.288222	-8.05341	8.05e-16	1.31e-14	SLC23A3	151295
ENSG00000101331	38.8519	-2.32147	0.510051	-4.55146	5.33e-06	2.89e-05	CCM2L	140706
ENSG00000197540	10.1403	-2.32291	0.860374	-2.69989	0.00693625	0.0198568	GZMM	3004
ENSG00000234327	530.249	-2.3252	0.229433	-10.1345	3.88e-24	1.08e-22	ZNF232-AS1	101928000
ENSG00000250635	52.339	-2.32543	0.347816	-6.6858	2.3e-11	2.48e-10	CXXC5-AS1	111082989
ENSG00000243383	5.4667	-2.32573	0.894916	-2.59883	0.00935427	0.0258308	RN7SL89P	106479256
ENSG00000170608	9.93359	-2.32889	0.92565	-2.51595	0.0118711	0.0317501	FOXA3	3171
ENSG00000179157	21.4847	-2.3296	0.504177	-4.62059	3.83e-06	2.12e-05	RPS2P28	100132673
ENSG00000188133	16.2347	-2.33221	1.00002	-2.33217	0.0196919	0.0492084	TMEM215	401498
ENSG00000255559	323.322	-2.33257	0.137535	-16.9599	1.63e-64	2.27e-62	ZNF252P-AS1	286103
ENSG00000206384	217.622	-2.33379	0.170011	-13.7273	6.97e-43	4.82e-41	COL6A6	131873
ENSG00000223570	7.18954	-2.33424	0.991489	-2.35428	0.0185587	0.0467624	RPL34P7	100127995
ENSG00000159650	9.7158	-2.33804	1.00368	-2.32946	0.0198349	0.049522	UROC1	131669
ENSG00000271045	8.11078	-2.33941	0.910381	-2.5697	0.0101786	0.0278372	LOC106050037	106050037
ENSG00000253603	45.8996	-2.34048	0.400976	-5.83697	5.32e-09	4.36e-08	CERNA3	105375847
ENSG00000233791	98.5109	-2.35556	0.330186	-7.13403	9.75e-13	1.21e-11	BTG2-DT	730227
ENSG00000233718	25.0856	-2.35573	0.853923	-2.75871	0.00580293	0.0169475	MYCNOS	10408
ENSG00000163106	8.42945	-2.35675	0.994282	-2.3703	0.0177735	0.0450664	HPGDS	27306
ENSG00000207550	5.77187	-2.3599	0.795489	-2.9666	0.0030111	0.00945661	MIR99B	407056
ENSG00000240270	29.5734	-2.36351	0.527202	-4.48313	7.36e-06	3.9e-05	RPL12P37	100129801
ENSG00000243954	6.01636	-2.36793	0.980462	-2.41511	0.0157304	0.0405333	RN7SL743P	106479492
ENSG00000223549	32.8145	-2.37661	0.432739	-5.49201	3.97e-08	2.92e-07	MTND5P28	100505755
ENSG00000249715	106.66	-2.37786	0.332894	-7.14297	9.13e-13	1.14e-11	FER1L5	90342
ENSG00000112343	172.388	-2.37878	0.366017	-6.49911	8.08e-11	8.2e-10	TRIM38	10475
ENSG00000229780	61.0743	-2.38182	0.357629	-6.66002	2.74e-11	2.94e-10	UBE2Q1-AS1	100874097
ENSG00000069018	29.0506	-2.38241	0.718884	-3.31404	0.00091959	0.00326449	TRPC7	57113
ENSG00000265692	230.158	-2.38646	0.169808	-14.0539	7.29e-45	5.53e-43	LINC01970	101929511
ENSG00000157214	10.685	-2.38913	0.915284	-2.61026	0.00904739	0.0250678	STEAP2	261729
ENSG00000268866	9.90158	-2.39331	0.690022	-3.46845	0.00052348	0.00196235	LOC100419847	100419847
ENSG00000199150	8.47724	-2.39748	0.642201	-3.73322	0.00018905	0.00077815	MIRLET7G	406890
ENSG00000178921	5217.01	-2.4037	0.516954	-4.64974	3.32e-06	1.86e-05	PFAS	5198
ENSG00000201184	5.15698	-2.40479	0.968351	-2.48338	0.0130141	0.034419	RNU4-68P	106479589
ENSG00000215088	16.2304	-2.40668	0.643397	-3.74058	0.00018359	0.00075791	RPS5P3	54022
ENSG00000185291	251.176	-2.40821	0.183337	-13.1354	2.06e-39	1.25e-37	IL3RA	3563
ENSG00000221763	14.3144	-2.4137	0.54916	-4.39526	1.11e-05	5.68e-05	MIR1289-1	100302125
ENSG00000145920	29.5819	-2.41498	0.71987	-3.35475	0.00079437	0.00286569	CPLX2	10814
ENSG00000198829	12.2412	-2.42611	1.04003	-2.33273	0.0196624	0.0491442	SUCNR1	56670
ENSG00000063978	32.449	-2.42845	0.413004	-5.87997	4.1e-09	3.42e-08	RNF4	6047
ENSG00000125386	32.449	-2.42845	0.413004	-5.87997	4.1e-09	3.42e-08	FAM193A	8603
ENSG00000206113	32.449	-2.42845	0.413004	-5.87997	4.1e-09	3.42e-08	CFAP99	402160
ENSG00000170374	169.753	-2.42898	0.267789	-9.0705	1.18e-19	2.54e-18	SP7	121340
ENSG00000102096	945.727	-2.4316	0.180591	-13.4647	2.52e-41	1.61e-39	PIM2	11040
ENSG00000104901	27.2757	-2.44046	0.581326	-4.19809	2.69e-05	0.00012952	DKKL1	27120
ENSG00000154342	19.8887	-2.45067	0.99811	-2.45531	0.0140762	0.0368053	WNT3A	89780
ENSG00000183921	28.09	-2.45095	0.468046	-5.23656	1.64e-07	1.11e-06	SDR42E2	100288072
ENSG00000255314	9.67645	-2.45314	0.690895	-3.55066	0.00038426	0.0014825	LOC101928894	101928894
ENSG00000198331	113.925	-2.46124	0.219964	-11.1893	4.6e-29	1.71e-27	HYLS1	219844
ENSG00000283982	57.1643	-2.46482	0.810112	-3.04256	0.00234572	0.0075847	LOC101929563	101929563
ENSG00000048462	38.2828	-2.4796	0.742771	-3.33832	0.00084288	0.00301964	TNFRSF17	608
ENSG00000229022	8.16648	-2.4804	0.84798	-2.92507	0.00344378	0.0106792	RPL6P3	391181
ENSG00000266290	17.5955	-2.48113	1.0291	-2.41097	0.0159103	0.0409245	DYNLL2-DT	101927666
ENSG00000234006	7.07498	-2.48129	0.71426	-3.47393	0.00051289	0.00192907	DDX39B-AS1	106478957
ENSG00000173250	113.171	-2.48318	0.471477	-5.26681	1.39e-07	9.5e-07	GPR151	134391
ENSG00000182896	13.9858	-2.48542	0.571699	-4.34743	1.38e-05	6.97e-05	TMEM95	339168
ENSG00000265160	6.23487	-2.48843	0.824313	-3.01879	0.00253787	0.00812197	MIR5003	100847029
ENSG00000145198	7.01093	-2.48865	0.797688	-3.11983	0.00180954	0.00601494	VWA5B2	90113
ENSG00000221120	7.01093	-2.48865	0.797688	-3.11983	0.00180954	0.00601494	MIR1224	100187716
ENSG00000256690	133.858	-2.48911	0.236895	-10.5072	8e-26	2.51e-24	STX5-DT	105369332
ENSG00000262154	57.9922	-2.49743	0.358877	-6.95901	3.43e-12	4.07e-11	EIF1P4	100130566
ENSG00000184702	46.2739	-2.49964	0.605151	-4.1306	3.62e-05	0.00017014	SEPTIN5	5413
ENSG00000260257	277.016	-2.50216	0.199882	-12.5182	5.94e-36	3.07e-34	LOC119746555	119746555
ENSG00000253551	15.615	-2.50385	0.998448	-2.50774	0.0121505	0.032394	LOC101929341	101929341
ENSG00000121377	4.49957	-2.51928	1.08199	-2.32838	0.0198917	0.0496448	TAS2R7	50837
ENSG00000197406	122.434	-2.52268	0.333147	-7.57226	3.67e-14	5.2e-13	DIO3	1735
ENSG00000229380	19.7092	-2.52678	0.704642	-3.58591	0.00033591	0.00131437	PRKAR1B-AS2	101927000
ENSG00000183828	4.30711	-2.52916	1.0683	-2.36745	0.0179109	0.0453508	NUDT14	256281
ENSG00000184916	4.30711	-2.52916	1.0683	-2.36745	0.0179109	0.0453508	JAG2	3714
ENSG00000273778	4.30711	-2.52916	1.0683	-2.36745	0.0179109	0.0453508	MIR6765	102465458
ENSG00000269959	836.713	-2.53051	0.194885	-12.9846	1.5e-38	8.76e-37	SPACA6-AS1	102238594
ENSG00000175513	8.58921	-2.53114	0.896511	-2.82332	0.00475292	0.0142064	TSGA10IP	254187
ENSG00000172238	15.9605	-2.53191	1.0808	-2.34263	0.0191484	0.0480209	ATOH1	474
ENSG00000271860	11.7331	-2.53543	0.669457	-3.78729	0.0001523	0.00063802	LOC101927314	101927314
ENSG00000172987	48.83	-2.53664	0.358927	-7.0673	1.58e-12	1.93e-11	HPSE2	60495
ENSG00000131459	679.898	-2.54209	0.189441	-13.4189	4.69e-41	2.97e-39	GFPT2	9945
ENSG00000050767	5.70891	-2.54499	0.998913	-2.54776	0.0108416	0.0293857	COL23A1	91522
ENSG00000222282	10.3544	-2.54728	0.747756	-3.40657	0.00065784	0.0024161	RNU6-584P	106479825
ENSG00000162944	217.834	-2.54888	0.26721	-9.53885	1.44e-21	3.5e-20	RFTN2	130132
ENSG00000165694	27.8668	-2.55426	0.686984	-3.71808	0.00020074	0.00082233	FRMD7	90167
ENSG00000202429	8.41678	-2.55444	0.770532	-3.31517	0.00091588	0.00325336	RNU4-48P	106479580
ENSG00000187733	5.68534	-2.56333	1.00961	-2.53893	0.0111191	0.0300221	AMY1C	278
ENSG00000238228	84.0313	-2.5678	0.364478	-7.04515	1.85e-12	2.25e-11	OR7E7P	392752
ENSG00000204659	41.2392	-2.56864	0.528254	-4.86251	1.16e-06	6.93e-06	CBY3	646019
ENSG00000164530	216.567	-2.57427	0.200451	-12.8424	9.48e-38	5.4e-36	PI16	221476
ENSG00000222522	10.1543	-2.57707	0.745098	-3.4587	0.00054279	0.0020268	RNU6-519P	106479796
ENSG00000185303	13.2486	-2.57931	0.987362	-2.61232	0.00899293	0.0249485	SFTPA2	729238
ENSG00000179580	54.0065	-2.5813	0.335539	-7.69299	1.44e-14	2.1e-13	RNF151	146310
ENSG00000261335	170.133	-2.58482	0.235627	-10.97	5.33e-28	1.87e-26	LOC105274304	105274304
ENSG00000220522	4.89664	-2.59627	1.05988	-2.44959	0.0143019	0.0373162	LOC100287856	100287856
ENSG00000287885	12.0876	-2.59646	0.923289	-2.81218	0.00492066	0.01465	LOC105371272	105371272
ENSG00000121853	8.50692	-2.60004	1.00213	-2.59451	0.00947247	0.0261096	GHSR	2693
ENSG00000174562	4.80423	-2.61311	1.00139	-2.60947	0.00906819	0.0251166	KLK15	55554
ENSG00000283567	27.9137	-2.61542	0.699953	-3.73656	0.00018655	0.00076844	C19orf85	111064650
ENSG00000273540	7.77119	-2.62593	1.08838	-2.41269	0.0158352	0.0407553	AGBL1	123624
ENSG00000285412	4.983	-2.6342	0.971367	-2.71185	0.00669097	0.0192231	LOC101928168	101928168
ENSG00000270930	35.7783	-2.63576	0.607496	-4.33873	1.43e-05	7.23e-05	GRAMD4P8	100631247
ENSG00000254064	54.6064	-2.64164	0.333809	-7.9136	2.5e-15	3.9e-14	PIWIL2-DT	100507071
ENSG00000230321	5.67054	-2.64672	0.936772	-2.82537	0.00472268	0.01413	MTCO2P27	107075291
ENSG00000187997	23.4977	-2.64731	0.737718	-3.58852	0.00033256	0.00130244	C17orf99	100141515
ENSG00000125997	37.3795	-2.64854	0.694484	-3.81369	0.00013691	0.00057865	BPIFB9P	402016
ENSG00000009694	79.3152	-2.65808	0.357298	-7.43938	1.01e-13	1.38e-12	TENM1	10178
ENSG00000135472	127.783	-2.67718	0.379202	-7.06005	1.66e-12	2.03e-11	FAIM2	23017
ENSG00000178460	202.216	-2.68078	0.333348	-8.042	8.84e-16	1.43e-14	MCMDC2	157777
ENSG00000130528	28.9919	-2.68293	0.468373	-5.72819	1.02e-08	8.07e-08	HRC	3270
ENSG00000182586	6.19841	-2.68411	1.10327	-2.43286	0.0149802	0.03888	LINC00334	114042
ENSG00000087495	28.5594	-2.69425	0.65216	-4.13127	3.61e-05	0.00016969	PHACTR3	116154
ENSG00000261432	11.5056	-2.69587	0.879284	-3.06598	0.00216955	0.00707547	LINC01613	106146149
ENSG00000105679	53.9852	-2.69982	0.350074	-7.71216	1.24e-14	1.82e-13	GAPDHS	26330
ENSG00000235629	10.2997	-2.70059	0.854839	-3.15918	0.00158214	0.00532014	LINC02922	121832816
ENSG00000152270	2165.11	-2.70127	0.562156	-4.80519	1.55e-06	9.07e-06	PDE3B	5140
ENSG00000253039	5.00152	-2.7055	1.06027	-2.55172	0.0107192	0.0290886	RNA5SP47	100873286
ENSG00000260804	1320.45	-2.70841	0.155475	-17.4202	5.8e-68	8.45e-66	LINC01963	150967
ENSG00000266909	6.84681	-2.71209	0.893373	-3.03579	0.00239908	0.00772816	SLC25A6P4	100422690
ENSG00000126950	34.4756	-2.71676	0.709606	-3.82855	0.0001289	0.00054793	TMEM35A	59353
ENSG00000126895	37.9338	-2.72392	0.494707	-5.50613	3.67e-08	2.71e-07	AVPR2	554
ENSG00000132698	10.1254	-2.73027	0.760866	-3.58837	0.00033275	0.00130291	RAB25	57111
ENSG00000105379	7.33752	-2.73522	0.965273	-2.83362	0.00460234	0.013814	ETFB	2109
ENSG00000160318	7.33752	-2.73522	0.965273	-2.83362	0.00460234	0.013814	CLDND2	125875
ENSG00000226501	25.3017	-2.74856	0.626767	-4.3853	1.16e-05	5.92e-05	USF1P1	100151645
ENSG00000101251	14.736	-2.76116	0.689402	-4.00515	6.2e-05	0.00028004	SEL1L2	80343
ENSG00000094755	15.1148	-2.76369	0.820038	-3.3702	0.00075114	0.0027247	GABRP	2568
ENSG00000237179	30.5527	-2.7662	0.466643	-5.92788	3.07e-09	2.6e-08	LINC01797	101927577
ENSG00000232528	4.25696	-2.7683	1.0331	-2.67961	0.00737073	0.0209242	LOC100289473	100289473
ENSG00000166855	1241.12	-2.76885	0.505666	-5.47566	4.36e-08	3.18e-07	CLPX	10845
ENSG00000019505	349.078	-2.7707	0.213005	-13.0077	1.11e-38	6.55e-37	SYT13	57586
ENSG00000137474	325.324	-2.77119	0.383324	-7.22937	4.85e-13	6.24e-12	MYO7A	4647
ENSG00000200095	4.12485	-2.7739	1.05356	-2.63288	0.00846641	0.0236914	RNU6-181P	106480559
ENSG00000260941	48.0199	-2.7926	0.54144	-5.15772	2.5e-07	1.65e-06	LINC00622	644242
ENSG00000125965	22.7925	-2.79923	0.582356	-4.80674	1.53e-06	9.01e-06	GDF5	8200
ENSG00000207948	4.35641	-2.79973	1.0893	-2.57021	0.0101638	0.0278031	MIR328	442901
ENSG00000013364	22.4897	-2.80486	0.735383	-3.81415	0.00013665	0.00057763	MVP	9961
ENSG00000103495	22.4897	-2.80486	0.735383	-3.81415	0.00013665	0.00057763	MAZ	4150
ENSG00000167371	22.4897	-2.80486	0.735383	-3.81415	0.00013665	0.00057763	PRRT2	112476
ENSG00000280789	22.4897	-2.80486	0.735383	-3.81415	0.00013665	0.00057763	PAGR1	79447
ENSG00000125998	33.0075	-2.8275	0.939115	-3.01082	0.00260547	0.00831331	FAM83C	128876
ENSG00000188263	342.999	-2.83836	0.203737	-13.9315	4.08e-44	2.99e-42	IL17REL	400935
ENSG00000240534	18.0377	-2.84444	1.12282	-2.5333	0.0112996	0.0304447	RPL34P17	100271001
ENSG00000107105	157.711	-2.84757	0.389093	-7.31847	2.51e-13	3.3e-12	ELAVL2	1993
ENSG00000226428	6.76449	-2.85357	1.2227	-2.33384	0.0196043	0.0490239	RPL15P13	100131338
ENSG00000241525	19.3854	-2.85826	0.710635	-4.02213	5.77e-05	0.00026229	LOC105371430	105371430
ENSG00000286352	14.8863	-2.86454	0.710549	-4.03144	5.54e-05	0.00025281	LOC105376975	105376975
ENSG00000136931	4.52627	-2.86546	1.19631	-2.39525	0.0166091	0.0425083	NR5A1	2516
ENSG00000253513	35.0499	-2.86557	0.594856	-4.81725	1.46e-06	8.58e-06	SQLE-DT	105375744
ENSG00000178772	13.9295	-2.87104	0.876103	-3.27705	0.00104896	0.00367669	CPN2	1370
ENSG00000187955	266.243	-2.87453	0.283558	-10.1374	3.77e-24	1.05e-22	COL14A1	7373
ENSG00000175202	24.5281	-2.87868	0.625851	-4.59962	4.23e-06	2.33e-05	HIGD2B	123346
ENSG00000132305	1281.24	-2.90142	0.839866	-3.45462	0.00055106	0.00205593	IMMT	10989
ENSG00000172349	180.831	-2.9028	0.332279	-8.73604	2.41e-18	4.76e-17	IL16	3603
ENSG00000253943	4.57352	-2.90671	0.98089	-2.96334	0.00304318	0.00954444	KRT18P37	392214
ENSG00000250490	7.28874	-2.91347	1.16887	-2.49255	0.0126828	0.0336288	LINC02145	401172
ENSG00000253176	6.74162	-2.91813	0.969963	-3.0085	0.00262543	0.00836819	LOC100130612	100130612
ENSG00000152092	18.04	-2.92495	0.862789	-3.39011	0.00069865	0.00255124	ASTN1	460
ENSG00000224414	8.28859	-2.93239	1.00209	-2.92627	0.00343055	0.0106432	LOC100533848	100533848
ENSG00000239333	10.6602	-2.93529	0.980568	-2.99346	0.00275835	0.00874022	RN7SL658P	106480524
ENSG00000141371	3.49733	-2.93596	1.13083	-2.59629	0.00942359	0.0259965	C17orf64	124773
ENSG00000207023	13.9861	-2.94681	0.59356	-4.96463	6.88e-07	4.25e-06	RNU6-975P	106479997
ENSG00000128242	7.47752	-2.95	1.16423	-2.53386	0.0112815	0.0304001	GAL3ST1	9514
ENSG00000137486	662.193	-2.95722	0.326505	-9.05718	1.34e-19	2.86e-18	ARRB1	408
ENSG00000080293	27.5045	-2.96233	0.598156	-4.95244	7.33e-07	4.51e-06	SCTR	6344
ENSG00000261803	64.4109	-2.96555	0.657239	-4.51214	6.42e-06	3.43e-05	LINC02140	100996345
ENSG00000135324	117.683	-2.96867	0.273324	-10.8614	1.76e-27	6e-26	MRAP2	112609
ENSG00000104112	30.7525	-2.9687	0.449968	-6.59757	4.18e-11	4.39e-10	SCG3	29106
ENSG00000224164	84.1687	-2.97076	0.719842	-4.12696	3.68e-05	0.00017272	LINC02828	105374978
ENSG00000102239	29.4637	-2.97076	0.518913	-5.72498	1.03e-08	8.21e-08	BRS3	680
ENSG00000272412	27.3129	-2.97245	0.474869	-6.25951	3.86e-10	3.62e-09	RN7SL778P	106479504
ENSG00000200495	3.50012	-2.99596	1.1789	-2.54132	0.0110435	0.0298427	RNU6-1205P	106480093
ENSG00000060718	6.45783	-3.01376	1.16806	-2.58014	0.00987606	0.0271075	COL11A1	1301
ENSG00000251819	3.73705	-3.03015	1.22424	-2.47513	0.0133187	0.0351091	RNU6-322P	107105253
ENSG00000214097	14.2287	-3.03179	0.855699	-3.54306	0.00039551	0.00152365	SMCO1	255798
ENSG00000236502	7.16957	-3.03372	0.978311	-3.10098	0.0019288	0.00636412	SIX3-AS1	100506108
ENSG00000182676	101.403	-3.04301	0.231703	-13.1332	2.12e-39	1.28e-37	PPP1R27	116729
ENSG00000226510	6.59833	-3.04512	1.20564	-2.52574	0.0115455	0.0310014	UPK1A-AS1	100862728
ENSG00000086991	5.139	-3.06634	1.30879	-2.34288	0.0191353	0.0479979	NOX4	50507
ENSG00000197943	7.69587	-3.08592	1.05698	-2.91956	0.00350525	0.0108425	PLCG2	5336
ENSG00000174807	9.33196	-3.09987	0.930512	-3.33136	0.00086424	0.00309055	CD248	57124
ENSG00000204889	3.94554	-3.1176	1.28724	-2.42193	0.0154382	0.0398874	KRT40	125115
ENSG00000271986	21.3852	-3.14825	0.79781	-3.94611	7.94e-05	0.00035164	RN7SL827P	106481762
ENSG00000165124	1588.04	-3.15489	0.743086	-4.24565	2.18e-05	0.00010639	SVEP1	79987
ENSG00000206658	1588.04	-3.15489	0.743086	-4.24565	2.18e-05	0.00010639	RNU6-1039P	106481931
ENSG00000169862	30.9746	-3.1553	0.890795	-3.54212	0.00039693	0.00152852	CTNND2	1501
ENSG00000167580	81.2658	-3.16796	0.455879	-6.94914	3.68e-12	4.35e-11	AQP2	359
ENSG00000233701	4.14676	-3.19064	1.2906	-2.47222	0.0134277	0.035361	PRR23C	389152
ENSG00000131127	2.77661	-3.1972	1.34271	-2.38116	0.017258	0.0439178	ZNF141	7700
ENSG00000013810	3157.12	-3.19827	0.733562	-4.35992	1.3e-05	6.61e-05	TACC3	10460
ENSG00000122882	19.277	-3.20666	0.880137	-3.64336	0.0002691	0.00107452	ECD	11319
ENSG00000221164	19.277	-3.20666	0.880137	-3.64336	0.0002691	0.00107452	SNORA11F	109617000
ENSG00000255647	207.091	-3.20971	0.291411	-11.0144	3.26e-28	1.16e-26	LOC731157	731157
ENSG00000007908	5.89295	-3.23483	1.23173	-2.62625	0.00863313	0.0241065	SELE	6401
ENSG00000108691	418.701	-3.23838	0.313022	-10.3455	4.38e-25	1.31e-23	CCL2	6347
ENSG00000274209	4.28736	-3.24686	1.39054	-2.33496	0.0195454	0.0488889	ANTXRL	195977
ENSG00000111181	2278.07	-3.26298	0.562489	-5.80096	6.59e-09	5.34e-08	SLC6A12	6539
ENSG00000275663	11.6294	-3.26605	0.897974	-3.63713	0.0002757	0.00109797	H4C7	8369
ENSG00000168484	13.9887	-3.27011	0.935572	-3.49531	0.00047351	0.00179586	SFTPC	6440
ENSG00000107147	8.86014	-3.27374	1.14975	-2.84736	0.00440841	0.0132975	KCNT1	57582
ENSG00000176302	4.53487	-3.27488	1.39151	-2.35347	0.0185993	0.0468437	FOXR1	283150
ENSG00000010327	34.7514	-3.29825	0.500194	-6.59394	4.28e-11	4.5e-10	STAB1	23166
ENSG00000236866	9.36248	-3.3077	1.15376	-2.8669	0.00414519	0.0125964	TENT5C-DT	100996263
ENSG00000197353	7.78014	-3.30938	1.22242	-2.70724	0.00678448	0.0194619	LYPD2	137797
ENSG00000205899	4.49659	-3.3128	1.17623	-2.81646	0.00485562	0.0144838	BHLHA9	727857
ENSG00000185668	68.7188	-3.34788	0.392499	-8.52966	1.47e-17	2.77e-16	POU3F1	5453
ENSG00000160352	13.9174	-3.3627	0.850684	-3.95294	7.72e-05	0.00034241	ZNF714	148206
ENSG00000233729	83.9225	-3.3678	0.85741	-3.92788	8.57e-05	0.00037774	NCKAP5-AS1	101928185
ENSG00000284516	7.14894	-3.37602	1.03628	-3.25782	0.00112272	0.00391363	VAMP9P	105377307
ENSG00000231666	6.32001	-3.39104	1.26773	-2.6749	0.00747519	0.0211932	LINC01704	646268
ENSG00000157087	38.6981	-3.39158	0.78864	-4.30054	1.7e-05	8.47e-05	ATP2B2	491
ENSG00000240311	4.6997	-3.39476	1.21087	-2.80356	0.00505412	0.0149884	RPL18P12	390671
ENSG00000204472	3.16022	-3.3987	1.35407	-2.51	0.0120732	0.0322271	AIF1	199
ENSG00000164287	4.86287	-3.40587	1.22426	-2.78199	0.00540262	0.0159117	CDC20B	166979
ENSG00000251856	4.86287	-3.40587	1.22426	-2.78199	0.00540262	0.0159117	MIR449C	100313923
ENSG00000175766	29.4656	-3.42343	0.702358	-4.8742	1.09e-06	6.56e-06	EIF4E1B	253314
ENSG00000231812	4.94168	-3.429	1.28546	-2.66752	0.00764133	0.0216162	SNRPCP9	100310853
ENSG00000010379	193.794	-3.44312	0.629717	-5.46773	4.56e-08	3.32e-07	SLC6A13	6540
ENSG00000232393	3.0925	-3.44403	1.41764	-2.42941	0.0151233	0.039192	RPL5P6	646784
ENSG00000167967	93.8867	-3.48895	0.435599	-8.00955	1.15e-15	1.84e-14	E4F1	1877
ENSG00000167968	93.8867	-3.48895	0.435599	-8.00955	1.15e-15	1.84e-14	DNASE1L2	1775
ENSG00000274098	4.77059	-3.49462	1.15075	-3.03682	0.0023909	0.0077143	RN7SL787P	106479507
ENSG00000188779	4.64111	-3.501	1.30323	-2.68639	0.00722282	0.0205458	SKOR1	390598
ENSG00000184857	360.024	-3.50507	1.34126	-2.61327	0.00896796	0.0248985	TMEM186	25880
ENSG00000202242	5.05109	-3.50762	1.10986	-3.16041	0.00157547	0.00530148	RNU6-1276P	106481583
ENSG00000213669	12.9948	-3.52128	0.79178	-4.44729	8.7e-06	4.56e-05	RPL21P86	100271190
ENSG00000076344	12.5198	-3.52494	1.09349	-3.22357	0.00126604	0.0043611	RGS11	8786
ENSG00000238777	1.99612	-3.52683	1.51195	-2.33263	0.0196674	0.0491536	RNU7-141P	106480822
ENSG00000199051	2.02694	-3.54626	1.40685	-2.52071	0.0117119	0.0313711	MIR361	494323
ENSG00000171357	6.96486	-3.55487	1.23058	-2.88878	0.00386739	0.0118354	LURAP1	541468
ENSG00000186235	8.66693	-3.55645	0.923001	-3.85313	0.00011662	0.00050067	LINC02610	151174
ENSG00000182162	7.05112	-3.56675	1.23573	-2.88634	0.0038975	0.0119229	P2RY8	286530
ENSG00000284662	2.0616	-3.56713	1.43582	-2.48438	0.0129777	0.0343296	OR4F16	81399
ENSG00000166869	4.9737	-3.57156	1.11138	-3.21363	0.0013107	0.00449568	CHP2	63928
ENSG00000231009	3.50778	-3.57207	1.35115	-2.64373	0.00819991	0.0230189	CUBNP1	728064
ENSG00000147443	9.84983	-3.6032	1.01708	-3.54271	0.00039604	0.00152539	DOK2	9046
ENSG00000240935	3.67406	-3.64295	1.26973	-2.86907	0.00411677	0.0125207	PLGLA	285189
ENSG00000258385	9.3059	-3.65402	1.30444	-2.80122	0.00509092	0.0150919	LOC100533628	100533628
ENSG00000104897	203.768	-3.65545	0.780202	-4.68526	2.8e-06	1.58e-05	SF3A2	8175
ENSG00000104899	203.768	-3.65545	0.780202	-4.68526	2.8e-06	1.58e-05	AMH	268
ENSG00000284272	203.768	-3.65545	0.780202	-4.68526	2.8e-06	1.58e-05	MIR4321	100423031
ENSG00000273940	2.17146	-3.66059	1.53948	-2.37781	0.0174158	0.0442765	RN7SL722P	106479486
ENSG00000230319	17.2458	-3.68411	1.16497	-3.16239	0.00156479	0.00526945	TTLL1-AS1	100506679
ENSG00000260220	11.4132	-3.68448	1.03154	-3.57182	0.00035451	0.00138044	CCDC187	399693
ENSG00000167741	28.8291	-3.70035	0.760335	-4.86674	1.13e-06	6.8e-06	GGT6	124975
ENSG00000234572	5.84604	-3.72876	1.24513	-2.99466	0.00274749	0.00870792	LINC01800	101927438
ENSG00000207943	2.30779	-3.73403	1.44305	-2.58759	0.00966512	0.0265792	MIR634	693219
ENSG00000100201	6801.12	-3.74092	1.19282	-3.13621	0.00171148	0.00571844	DDX17	10521
ENSG00000206917	3.7741	-3.74268	1.27876	-2.9268	0.00342474	0.0106277	RNU1-52P	106480164
ENSG00000126233	57.4335	-3.74481	0.908089	-4.12384	3.73e-05	0.00017474	SLURP1	57152
ENSG00000180044	59.6554	-3.74763	0.370898	-10.1042	5.29e-24	1.47e-22	C3orf80	401097
ENSG00000225180	13.4267	-3.74781	0.738136	-5.0774	3.83e-07	2.45e-06	PVALEF	388428
ENSG00000284733	2.35217	-3.77501	1.3793	-2.73691	0.00620194	0.0179715	OR4F29	729759
ENSG00000264271	2.36924	-3.78298	1.59113	-2.37754	0.0174287	0.0443064	RN7SL488P	106479401
ENSG00000186628	324.861	-3.78754	0.400242	-9.46312	2.99e-21	7.11e-20	FSD2	123722
ENSG00000108001	14.6991	-3.79549	1.00284	-3.78475	0.00015386	0.00064429	EBF3	253738
ENSG00000247213	7.70077	-3.81841	1.03238	-3.69864	0.00021676	0.00088088	LINC01498	102723562
ENSG00000166342	51.1506	-3.83771	0.930371	-4.12492	3.71e-05	0.000174	NETO1	81832
ENSG00000166233	303.395	-3.84499	0.671885	-5.72269	1.05e-08	8.31e-08	ARIH1	25820
ENSG00000283798	303.395	-3.84499	0.671885	-5.72269	1.05e-08	8.31e-08	MIR630	693215
ENSG00000243069	6.06652	-3.84916	1.13201	-3.40028	0.00067317	0.00246619	ARHGEF26-AS1	100507524
ENSG00000221598	6.10595	-3.85231	1.01545	-3.79368	0.00014843	0.00062306	MIR1249	100302149
ENSG00000260224	8.67483	-3.85729	1.16113	-3.322	0.00089375	0.00318279	UBL5P4	106480800
ENSG00000218490	18.5825	-3.89362	0.750006	-5.19145	2.09e-07	1.4e-06	FCF1P10	106479046
ENSG00000276562	2.55186	-3.90059	1.41572	-2.75519	0.00586576	0.0171005	RN7SL565P	106481076
ENSG00000126391	740.983	-3.91144	0.597691	-6.54425	5.98e-11	6.18e-10	FRMD8	83786
ENSG00000245532	740.983	-3.91144	0.597691	-6.54425	5.98e-11	6.18e-10	NEAT1	283131
ENSG00000283791	740.983	-3.91144	0.597691	-6.54425	5.98e-11	6.18e-10	MIR612	693197
ENSG00000182631	1.51201	-3.9218	1.64491	-2.3842	0.0171164	0.0436166	RXFP3	51289
ENSG00000138741	11.0379	-3.92475	1.0303	-3.80933	0.00013934	0.00058762	TRPC3	7222
ENSG00000250037	17.2435	-3.93102	0.639925	-6.14295	8.1e-10	7.31e-09	LOC100419318	100419318
ENSG00000143452	6.85583	-3.95268	1.13228	-3.49092	0.00048137	0.00182215	HORMAD1	84072
ENSG00000143595	4.52042	-3.97032	1.30489	-3.04266	0.002345	0.00758299	AQP10	89872
ENSG00000234450	4.59762	-3.98328	1.38456	-2.87694	0.00401558	0.0122527	RPL26P23	100129517
ENSG00000256577	96.7894	-3.98499	0.796029	-5.00608	5.55e-07	3.48e-06	SLC6A12-AS1	101929384
ENSG00000231256	18.5284	-3.98572	0.878272	-4.53815	5.68e-06	3.06e-05	CFAP97D1	284067
ENSG00000255151	1.57528	-3.98845	1.61584	-2.46834	0.0135742	0.0356727	GLYATL1B	100287520
ENSG00000132972	4.41531	-3.99212	1.27514	-3.13072	0.00174379	0.00581555	RNF17	56163
ENSG00000199158	1.6169	-4.02063	1.62674	-2.47158	0.0134517	0.0354115	MIR96	407053
ENSG00000267128	7.04529	-4.02685	1.09929	-3.66314	0.00024914	0.00100151	RNF157-AS1	100507218
ENSG00000222259	11.9079	-4.02843	0.934529	-4.31065	1.63e-05	8.13e-05	RN7SKP114	106480868
ENSG00000182521	1.63502	-4.04819	1.73668	-2.33099	0.0197539	0.0493415	TBPL2	387332
ENSG00000162006	105.826	-4.04867	1.46444	-2.76465	0.00569845	0.0166794	MSLNL	401827
ENSG00000250156	2.85149	-4.05048	1.3653	-2.96672	0.0030099	0.00945363	LINC02060	102546226
ENSG00000227195	801.634	-4.05685	1.23425	-3.28689	0.00101302	0.0035637	MIR663AHG	284801
ENSG00000284419	801.634	-4.05685	1.23425	-3.28689	0.00101302	0.0035637	MIR663A	724033
ENSG00000288531	7.21346	-4.062	1.36039	-2.98592	0.00282731	0.00893571	LOC107984850	107984850
ENSG00000275816	1.65278	-4.06339	1.58966	-2.55613	0.0105843	0.0287774	MIR6500	102466656
ENSG00000256533	86.2492	-4.10698	0.417863	-9.82853	8.49e-23	2.19e-21	LOC100422382	100422382
ENSG00000265272	7.01173	-4.11557	1.20862	-3.40519	0.00066118	0.00242678	RN7SL693P	106479477
ENSG00000246394	4.98807	-4.11612	1.28455	-3.20434	0.00135374	0.00463241	ZNF84-DT	101928597
ENSG00000200366	1.73556	-4.12171	1.57029	-2.6248	0.00866997	0.0241912	RNU6-511P	106479793
ENSG00000253542	5.17588	-4.15806	1.68561	-2.46679	0.0136329	0.035808	SDR16C6P	442388
ENSG00000235214	15.5573	-4.16153	0.797095	-5.22086	1.78e-07	1.2e-06	FAM83C-AS1	140846
ENSG00000264814	1.7752	-4.16425	1.67787	-2.48187	0.0130696	0.0345544	MIR1273C	100422821
ENSG00000237361	7.82346	-4.1841	1.10756	-3.77777	0.00015824	0.00066119	TUSC8	400128
ENSG00000237928	1.81307	-4.19021	1.55274	-2.6986	0.00696325	0.019924	NFIA-AS2	100996570
ENSG00000225922	1.81636	-4.19234	1.69894	-2.46762	0.0136014	0.0357347	RPL21P92	100130400
ENSG00000236483	21.1333	-4.19632	1.00754	-4.16493	3.11e-05	0.0001483	MTND2P40	107075280
ENSG00000229102	1.83693	-4.20592	1.55893	-2.69795	0.00697684	0.0199542	PIK3CA-DT	101928739
ENSG00000243711	3.12257	-4.21074	1.61779	-2.60278	0.0092472	0.0255549	RPL21P116	100271444
ENSG00000115085	19.5357	-4.21384	1.0781	-3.90859	9.28e-05	0.00040628	ZAP70	7535
ENSG00000170419	24.1855	-4.23191	0.776798	-5.44789	5.1e-08	3.69e-07	VSTM2A	222008
ENSG00000018236	3.42931	-4.33334	1.33297	-3.25089	0.00115044	0.00399821	CNTN1	1272
ENSG00000110680	1.99491	-4.33351	1.48504	-2.91811	0.00352156	0.0108862	CALCA	796
ENSG00000239648	13.4146	-4.34972	1.08386	-4.01317	5.99e-05	0.00027154	MTND1P3	100288984
ENSG00000223446	19.5557	-4.40855	0.905808	-4.86699	1.13e-06	6.79e-06	LOC101927993	101927993
ENSG00000189030	6.11498	-4.43125	1.25527	-3.53011	0.00041539	0.00159294	VHLL	391104
ENSG00000130876	5.98899	-4.4445	1.24493	-3.57008	0.00035688	0.00138772	SLC7A10	56301
ENSG00000237818	9.21857	-4.51097	1.10317	-4.08911	4.33e-05	0.00020118	RPS3AP29	730861
ENSG00000235686	3.91818	-4.52973	1.40166	-3.23168	0.00123065	0.00425295	PPIAP20	100500737
ENSG00000236138	6.47756	-4.53765	1.19721	-3.79018	0.00015054	0.00063152	DUX4L26	100996350
ENSG00000234109	2.32855	-4.54713	1.63152	-2.78705	0.00531909	0.015695	RPL7P36	100271218
ENSG00000260675	2.32105	-4.55916	1.61634	-2.82066	0.00479246	0.0143105	TCERG1P2	100421029
ENSG00000239199	6.50755	-4.56204	1.22583	-3.72158	0.00019798	0.00081134	RPL21P6	652975
ENSG00000184344	21.1852	-4.56725	1.17693	-3.88065	0.00010418	0.0004517	GDF3	9573
ENSG00000283051	10.2102	-4.57352	1.03186	-4.43228	9.32e-06	4.86e-05	LINC01668	101928311
ENSG00000286958	2.39926	-4.59267	1.57343	-2.91888	0.0035129	0.0108606	LOC105376435	105376435
ENSG00000233079	2.42841	-4.61496	1.98099	-2.32963	0.0198257	0.0495053	LINC01755	105378738
ENSG00000176571	2.43881	-4.62308	1.4354	-3.22076	0.0012785	0.0043969	CNBD1	168975
ENSG00000274618	2.48291	-4.63918	1.7424	-2.66252	0.00775576	0.0219098	H4C6	8361
ENSG00000260161	2.49901	-4.65816	1.98934	-2.34156	0.0192034	0.0481435	MTCYBP28	107075134
ENSG00000265188	4.34853	-4.67983	1.42328	-3.28805	0.00100882	0.00355149	LOC100422274	100422274
ENSG00000285445	2.56259	-4.68469	1.54141	-3.03922	0.00237194	0.00766067	TUSC2P2	112552163
ENSG00000230447	4.42558	-4.71744	1.79639	-2.62606	0.00863788	0.0241164	CTF2P	100289419
ENSG00000188425	2.671	-4.74479	1.50347	-3.15588	0.00160014	0.00537334	NANOS2	339345
ENSG00000214842	15.3103	-4.76588	1.04978	-4.53987	5.63e-06	3.04e-05	RAD51AP2	729475
ENSG00000232913	2.7537	-4.79683	1.97172	-2.43282	0.0149819	0.038882	PLCE1-AS2	101927049
ENSG00000106633	2.77335	-4.80711	1.52066	-3.16119	0.00157124	0.00528979	GCK	2645
ENSG00000257127	2.79279	-4.81926	1.94523	-2.47748	0.0132314	0.0348999	CLLU1	574028
ENSG00000206599	2.81836	-4.82776	1.96152	-2.46124	0.0138458	0.0362632	RNU6-841P	106480699
ENSG00000178795	2.83002	-4.83373	1.96082	-2.46516	0.0136952	0.0359452	GDPD4	220032
ENSG00000226969	12.0434	-4.83769	1.05216	-4.59788	4.27e-06	2.35e-05	PRKCZ-DT	105378591
ENSG00000204403	2.88751	-4.86753	1.96761	-2.47383	0.0133674	0.0352186	CASP12	100506742
ENSG00000130643	2.94345	-4.88779	1.99546	-2.44946	0.0143072	0.0373228	CALY	50632
ENSG00000154227	2.96325	-4.90286	1.92082	-2.55248	0.0106958	0.0290324	CERS3	204219
ENSG00000171611	2.98103	-4.90483	2.00235	-2.44954	0.0143041	0.037317	PTCRA	171558
ENSG00000214336	3.03492	-4.93517	1.96014	-2.51777	0.01181	0.0316039	FOXI3	344167
ENSG00000173673	3.03094	-4.93894	1.95786	-2.52262	0.0116484	0.0312498	HES3	390992
ENSG00000100804	150.973	-4.94421	1.81018	-2.73134	0.00630769	0.0182458	PSMB5	5693
ENSG00000170310	39.6916	-4.96911	1.18473	-4.1943	2.74e-05	0.00013154	STX8	9482
ENSG00000236611	3.11567	-4.97151	2.01449	-2.46788	0.0135917	0.0357141	LINC02556	102724679
ENSG00000262179	5.33225	-4.99682	1.26435	-3.9521	7.75e-05	0.00034346	MYMX	101929726
ENSG00000104921	3.28088	-5.04715	1.93877	-2.60328	0.0092337	0.0255194	FCER2	2208
ENSG00000177047	3.29205	-5.0567	1.91852	-2.63573	0.00839561	0.0235117	IFNW1	3467
ENSG00000207691	3.3113	-5.05812	1.40321	-3.60469	0.00031253	0.00122985	MIR183	406959
ENSG00000238284	3.30262	-5.06619	1.46365	-3.46133	0.00053752	0.00200978	LINC01448	101928795
ENSG00000166317	3.33014	-5.07	1.8845	-2.69037	0.00713723	0.020342	SYNPO2L	79933
ENSG00000241709	5.69066	-5.08435	1.46869	-3.46182	0.00053653	0.00200627	RN7SL265P	106479318
ENSG00000252688	3.38193	-5.09095	1.38221	-3.68319	0.00023034	0.00093192	RNU6-579P	106481364
ENSG00000096088	14.1904	-5.09149	1.00092	-5.08683	3.64e-07	2.34e-06	PGC	5225
ENSG00000123454	3.38174	-5.09297	1.96482	-2.59208	0.00953979	0.026275	DBH	1621
ENSG00000260172	3.37954	-5.09658	1.40702	-3.62226	0.00029204	0.00115687	LINC01413	101928611
ENSG00000258779	3.44655	-5.11403	1.37435	-3.72105	0.0001984	0.00081297	LINC01568	100506172
ENSG00000252755	3.4503	-5.1158	1.38679	-3.68895	0.00022518	0.00091286	RNU6-703P	106479876
ENSG00000228940	3.44018	-5.11664	1.92796	-2.65392	0.00795632	0.0224105	LOC100128362	100128362
ENSG00000176771	1852.35	-5.13036	0.947854	-5.41261	6.21e-08	4.46e-07	NCKAP5	344148
ENSG00000116882	3.49136	-5.13303	1.99746	-2.56978	0.0101762	0.0278331	HAO2	51179
ENSG00000172938	3.49436	-5.13593	1.9276	-2.66442	0.00771217	0.0217961	MRGPRD	116512
ENSG00000160991	256.543	-5.14159	1.42061	-3.6193	0.0002954	0.00116982	ORAI2	80228
ENSG00000165821	3.50407	-5.14664	1.4373	-3.58078	0.00034257	0.00133816	SALL2	6297
ENSG00000263201	3.60249	-5.17817	1.92178	-2.69446	0.00705025	0.020132	DPEP2NB	100131303
ENSG00000169856	3.60773	-5.18221	1.95398	-2.65213	0.00799859	0.0225215	ONECUT1	3175
ENSG00000241361	3.67828	-5.21435	1.31438	-3.96714	7.27e-05	0.00032421	SLC25A24P1	727941
ENSG00000180999	3.73096	-5.23248	1.88591	-2.77451	0.00552854	0.0162352	C1orf105	92346
ENSG00000231013	3.73496	-5.23635	1.85223	-2.82705	0.00469784	0.0140621	SCTR-AS1	107105282
ENSG00000247809	162.053	-5.27268	0.508886	-10.3612	3.72e-25	1.11e-23	NR2F2-AS1	644192
ENSG00000251389	6.55891	-5.30404	1.46995	-3.60831	0.0003082	0.00121462	YTHDF1P1	402220
ENSG00000167434	3.92426	-5.31275	1.3223	-4.0178	5.87e-05	0.00026669	CA4	762
ENSG00000118156	4.04875	-5.3508	1.26429	-4.23227	2.31e-05	0.00011241	ZNF541	84215
ENSG00000159173	4.10574	-5.37389	1.37075	-3.92041	8.84e-05	0.00038872	TNNI1	7135
ENSG00000236241	4.12657	-5.38015	1.34622	-3.99647	6.43e-05	0.00028951	LOC100421238	100421238
ENSG00000132692	260.503	-5.40078	1.30514	-4.1381	3.5e-05	0.00016533	BCAN	63827
ENSG00000115616	4.30155	-5.4412	1.83903	-2.95873	0.00308911	0.00968001	SLC9A2	6549
ENSG00000189184	4.32825	-5.44496	1.33565	-4.07663	4.57e-05	0.00021109	PCDH18	54510
ENSG00000178722	4.35112	-5.45615	1.55892	-3.49995	0.00046534	0.00176744	C5orf64	285668
ENSG00000129991	4.45224	-5.48683	1.85136	-2.96367	0.00303989	0.00953641	TNNI3	7137
ENSG00000231090	4.45542	-5.48691	1.46446	-3.74671	0.00017917	0.00074119	MIR4422HG	109729135
ENSG00000168621	4.70263	-5.56331	1.9113	-2.91074	0.00360571	0.0111245	GDNF	2668
ENSG00000233633	4.70716	-5.56433	1.33855	-4.15699	3.22e-05	0.00015312	LOC105373352	105373352
ENSG00000143196	4.72827	-5.57866	1.58929	-3.51015	0.00044785	0.00170793	DPT	1805
ENSG00000266524	4.75155	-5.58147	1.42442	-3.91841	8.91e-05	0.00039165	GDF10	2662
ENSG00000168135	4.76641	-5.58721	1.81182	-3.08376	0.00204402	0.00670557	KCNJ4	3761
ENSG00000111058	4.80875	-5.60151	1.92858	-2.90447	0.0036787	0.0113248	ACSS3	79611
ENSG00000182132	5.06624	-5.67432	1.39557	-4.06595	4.78e-05	0.00022024	KCNIP1	30820
ENSG00000142025	5.09476	-5.68517	1.3237	-4.29491	1.75e-05	8.67e-05	DMRTC2	63946
ENSG00000172179	5.17885	-5.70211	1.34786	-4.23049	2.33e-05	0.00011322	PRL	5617
ENSG00000170231	5.20418	-5.71524	1.47366	-3.87825	0.00010521	0.00045563	FABP6	2172
ENSG00000232190	5.27189	-5.73179	1.81455	-3.1588	0.00158422	0.00532666	LINC02181	440390
ENSG00000223382	5.28117	-5.73433	1.24439	-4.60814	4.06e-06	2.24e-05	LINC01778	105378622
ENSG00000197308	5.40956	-5.7752	1.31607	-4.38823	1.14e-05	5.85e-05	GATA3-AS1	399717
ENSG00000002726	5.45547	-5.77845	1.21935	-4.73895	2.15e-06	1.24e-05	AOC1	26
ENSG00000165457	5.9051	-5.89473	1.79788	-3.27871	0.00104281	0.00365774	FOLR2	2350
ENSG00000288611	6.14367	-5.95624	1.32081	-4.50955	6.5e-06	3.48e-05	NPBWR1	2831
ENSG00000234988	6.62047	-6.0621	1.7849	-3.39633	0.00068295	0.00249854	LINC01849	105373507
ENSG00000108242	6.98653	-6.13721	1.79958	-3.41037	0.00064875	0.00238583	CYP2C18	1562
ENSG00000258700	7.31042	-6.20481	1.41576	-4.38266	1.17e-05	5.99e-05	LINC00871	100506412
ENSG00000187616	7.4075	-6.22305	1.28522	-4.84201	1.29e-06	7.65e-06	MYMK	389827
ENSG00000249035	7.56739	-6.25307	1.3147	-4.75626	1.97e-06	1.14e-05	CLMAT3	101927096
ENSG00000182492	7.59565	-6.25883	1.7541	-3.56811	0.00035957	0.00139722	BGN	633
ENSG00000164100	7.65241	-6.26991	1.74343	-3.59632	0.00032275	0.00126718	NDST3	9348
ENSG00000254854	7.90026	-6.31733	1.24358	-5.07996	3.78e-07	2.42e-06	NECTIN1-DT	102724301
ENSG00000104267	8.50914	-6.42337	1.83306	-3.50418	0.00045802	0.0017418	CA2	760
ENSG00000225768	9.03818	-6.50902	1.22066	-5.33238	9.69e-08	6.77e-07	LINC02620	101927523
ENSG00000166147	3626.57	-6.86427	2.32322	-2.95464	0.00313035	0.00979523	FBN1	2200
ENSG00000148671	14.3091	-7.17117	1.71696	-4.17667	2.96e-05	0.00014135	ADIRF	10974
ENSG00000188100	14.3091	-7.17117	1.71696	-4.17667	2.96e-05	0.00014135	FAM25A	643161
ENSG00000240089	14.3091	-7.17117	1.71696	-4.17667	2.96e-05	0.00014135	BMS1P3	414217
ENSG00000271880	14.3091	-7.17117	1.71696	-4.17667	2.96e-05	0.00014135	AGAP11	119385
ENSG00000102678	16.6601	-7.39413	1.10337	-6.70138	2.06e-11	2.24e-10	FGF9	2254
ENSG00000106028	190.026	-8.06966	3.28746	-2.45468	0.0141011	0.0368633	SSBP1	6742
ENSG00000270923	190.026	-8.06966	3.28746	-2.45468	0.0141011	0.0368633	TAS2R6P	448990
ENSG00000258135	52.2595	-9.0431	1.06511	-8.49027	2.06e-17	3.86e-16	LINC02396	283332
ENSG00000007866	104.71	-10.0436	2.80272	-3.58352	0.00033899	0.00132577	TEAD3	7005
ENSG00000112041	104.71	-10.0436	2.80272	-3.58352	0.00033899	0.00132577	TULP1	7287
ENSG00000081051	162.881	-10.681	2.84949	-3.7484	0.00017796	0.00073652	AFP	174
ENSG00000188906	245.119	-11.2707	2.92886	-3.84814	0.00011902	0.00050938	LRRK2	120892
ENSG00000067177	962.082	-13.2433	3.11972	-4.24503	2.19e-05	0.00010668	PHKA1	5255
ENSG00000112130	157.367	-24.9533	3.38359	-7.37479	1.65e-13	2.21e-12	RNF8	9025
ENSG00000239953	157.367	-24.9533	3.38359	-7.37479	1.65e-13	2.21e-12	RN7SL273P	106481834
ENSG00000129226	7192.46	-30	3.38338	-8.86688	7.52e-19	1.52e-17	CD68	968
